# Supplementary material for: Integrating omics reveals that miRNA-guided genetic regulation on plant hormone level and defense response pathways shape resistance to Cladosporium fulvum in the tomato Cf-10-gene-carrying line
Source: Front Genet. 2023 May 25;14:1158631. doi: 10.3389/fgene.2023.1158631 (PMC10248068; doi:10.3389/fgene.2023.1158631)
Supplement: Supplementary file 5 [file Table9.XLSX]

## Sheet: Sheet1
Table S9 Differently expressed genes between before and 3dpi at susceptible line and their GO enrichment results.
#ID	CKMM-1_Count	CKMM-2_Count	CKMM-3_Count	MM-1_Count	MM-2_Count	MM-3_Count	CKMM-1_FPKM	CKMM-2_FPKM	CKMM-3_FPKM	MM-1_FPKM	MM-2_FPKM	MM-3_FPKM	FDR	log1.5(Fold change)	Class	GO_Name	GO_ID	GO_Level	p value	EnrichmentScore	HitsGenesCountsInSelectedSet	HitsGenesCountsInBackground	AllGenesCountsInSelectedSet	AllGenesCountsInBackground	GenesOfSelectedSetInGOterm	Corrected p value(BH method)
Solyc07g063910.4	3557	1740	1508	13	45	48	194.585	94.3852	69.3524	0.704731	2.41787	2.68112	2.52e-30	-9.83825	Molecular function	catalytic activity	GO:0003824	2	3.44169e-15	1.08548	2978	9864	5067	18218	Solyc06g084570.4,Solyc08g082460.4,Solyc08g080050.4,Solyc05g025810.3,Solyc10g011820.4,Solyc11g008960.3,Solyc12g042480.3,Solyc06g082280.3,Solyc05g056170.3,Solyc07g056470.3,Solyc01g111120.4,Solyc11g071610.2,Solyc08g082340.3,Solyc11g007690.3,Solyc01g104970.3,Solyc04g071140.3,Solyc11g071970.2,Solyc07g056350.3,Solyc12g055740.2,Solyc02g063180.4,Solyc11g017270.2,Solyc02g065590.3,Solyc12g099000.3,Solyc08g…
Solyc07g064960.2	83	67	102	0	0	2	2.00203	1.61529	2.06845	0	0	0.049286	5.22e-17	-9.63979	1g017250.2,Solyc04g008400.1,Solyc10g054440.3,Solyc02g084930.3,Solyc11g065890.2,Solyc08g081170.4,Solyc04g081790.3,Solyc10g086760.2,Solyc02g069580.3,Solyc06g071290.3,Solyc06g051940.4,Solyc01g110000.3,Solyc03g117690.3,Solyc01g008280.4,Solyc06g005140.3,Solyc02g092580.3,Solyc09g009780.4,Solyc06g009800.3,Solyc01g111020.3,Solyc02g085950.4,Solyc11g044980.1,Solyc01g057310.4,Solyc06g005260.3,Solyc06g071830…	4.81837e-12
Solyc12g006140.2	13928	14085	29918	114	225	629	366.783	367.846	662.382	3.02783	5.83855	17.1665	1.93e-23	-9.37723	Molecular function	kinase activity	GO:0016301	5	3.16414e-14	1.30485	552	1521	5067	18218	Solyc08g082460.4,Solyc11g008960.3,Solyc11g007690.3,Solyc01g104970.3,Solyc11g071970.2,Solyc07g056350.3,Solyc11g017270.2,Solyc01g094960.3,Solyc01g007970.2,Solyc10g011690.3,Solyc01g010030.3,Solyc11g013180.2,Solyc06g071810.1,Solyc03g111540.2,Solyc02g072470.4,Solyc12g009310.2,Solyc03g121610.3,Solyc11g072630.2,Solyc02g068540.2,Solyc05g023760.3,Solyc02g031790.3,Solyc04g008370.3,Solyc08g074560.3,Solyc03g…	2.21489e-11
Solyc03g123410.1	8398	13846	26292	227	304	625	369.27	603.845	972.042	10.031	13.1422	28.5202	1.46e-28	-8.88288	Molecular function	small molecule binding	GO:0036094	3	9.82547e-14	1.17725	1202	3671	5067	18218	Solyc08g082460.4,Solyc11g008960.3,Solyc11g071610.2,Solyc07g047790.3,Solyc01g104970.3,Solyc04g071140.3,Solyc11g071970.2,Solyc07g056350.3,Solyc02g063180.4,Solyc11g017270.2,Solyc12g099000.3,Solyc01g094960.3,Solyc01g007970.2,Solyc01g005560.3,Solyc10g079300.2,Solyc07g022790.4,Solyc06g083790.3,Solyc05g010260.4,Solyc10g011690.3,Solyc01g010030.3,Solyc11g013180.2,Solyc06g071810.1,Solyc03g111540.2,Solyc07g…	4.58522e-11
Solyc02g070950.1	22333	33401	97355	177	222	999	771.619	1144.53	2828.04	6.15809	7.53879	35.7981	2.08e-09	-8.37396	Molecular function	phosphotransferase activity, alcohol group as acceptor	GO:0016773	5	4.03566e-13	1.30015	520	1438	5067	18218	Solyc08g082460.4,Solyc11g008960.3,Solyc11g007690.3,Solyc01g104970.3,Solyc11g071970.2,Solyc07g056350.3,Solyc11g017270.2,Solyc01g094960.3,Solyc01g007970.2,Solyc10g011690.3,Solyc01g010030.3,Solyc11g013180.2,Solyc06g071810.1,Solyc03g111540.2,Solyc02g072470.4,Solyc12g009310.2,Solyc03g121610.3,Solyc11g072630.2,Solyc02g068540.2,Solyc05g023760.3,Solyc02g031790.3,Solyc04g008370.3,Solyc08g074560.3,Solyc03g…	1.41248e-10
Solyc02g070970.1	42762	58529	129362	103	380	1533	1477.49	2005.57	3757.83	3.57343	12.9216	54.9371	3.02e-09	-8.35468	Molecular function	anion binding	GO:0043168	4	6.24389e-13	1.17484	1160	3550	5067	18218	Solyc08g082460.4,Solyc11g008960.3,Solyc11g071610.2,Solyc07g047790.3,Solyc01g104970.3,Solyc04g071140.3,Solyc11g071970.2,Solyc07g056350.3,Solyc02g063180.4,Solyc11g017270.2,Solyc12g099000.3,Solyc01g094960.3,Solyc01g007970.2,Solyc10g079300.2,Solyc07g022790.4,Solyc06g083790.3,Solyc10g011690.3,Solyc01g010030.3,Solyc11g013180.2,Solyc06g071810.1,Solyc03g111540.2,Solyc07g014650.3,Solyc02g072470.4,Solyc02g…	1.74829e-10
Solyc03g005780.3	59462	78209	123346	590	2465	4055	1233.63	1609.16	2151.46	12.3443	50.4063	87.2834	1.07e-18	-8.32986	Molecular function	transferase activity, transferring phosphorus-containing groups	GO:0016772	4	6.77791e-13	1.26775	610	1730	5067	18218	Solyc08g082460.4,Solyc11g008960.3,Solyc11g007690.3,Solyc01g104970.3,Solyc11g071970.2,Solyc07g056350.3,Solyc11g017270.2,Solyc01g094960.3,Solyc01g007970.2,Solyc10g011690.3,Solyc01g010030.3,Solyc11g013180.2,Solyc06g071810.1,Solyc03g111540.2,Solyc02g072470.4,Solyc12g009310.2,Solyc03g121610.3,Solyc11g072630.2,Solyc02g068540.2,Solyc05g023760.3,Solyc02g031790.3,Solyc04g008370.3,Solyc08g074560.3,Solyc03g…	1.58151e-10
Solyc02g070980.1	13718	21700	51191	66	130	584	473.971	743.556	1487.02	2.28746	4.42125	20.926	3.71e-09	-8.30553	Molecular function	protein kinase activity	GO:0004672	6	8.22487e-12	1.29766	471	1305	5067	18218	Solyc08g082460.4,Solyc11g008960.3,Solyc01g104970.3,Solyc11g071970.2,Solyc07g056350.3,Solyc11g017270.2,Solyc01g094960.3,Solyc01g007970.2,Solyc10g011690.3,Solyc01g010030.3,Solyc06g071810.1,Solyc03g111540.2,Solyc02g072470.4,Solyc12g009310.2,Solyc03g121610.3,Solyc11g072630.2,Solyc02g068540.2,Solyc05g023760.3,Solyc02g031790.3,Solyc04g008370.3,Solyc08g074560.3,Solyc03g117790.2,Solyc01g007120.3,Solyc03g…	1.64497e-09
Solyc02g091920.3	4600	7163	12575	67	245	381	89.9416	138.913	206.739	1.31934	4.70498	7.71921	6.53e-19	-8.25299	Molecular function	nucleotide binding	GO:0000166	5	1.18424e-11	1.16726	1122	3456	5067	18218	Solyc08g082460.4,Solyc11g008960.3,Solyc11g071610.2,Solyc07g047790.3,Solyc01g104970.3,Solyc11g071970.2,Solyc07g056350.3,Solyc02g063180.4,Solyc11g017270.2,Solyc12g099000.3,Solyc01g094960.3,Solyc01g007970.2,Solyc01g005560.3,Solyc10g079300.2,Solyc07g022790.4,Solyc06g083790.3,Solyc05g010260.4,Solyc10g011690.3,Solyc01g010030.3,Solyc11g013180.2,Solyc06g071810.1,Solyc03g111540.2,Solyc07g014650.3,Solyc02g…	2.07242e-09
Solyc09g010220.4	561	633	813	20	30	40	8.75621	9.79334	10.6672	0.313299	0.455255	0.63266	4.8e-55	-7.85222	Molecular function	nucleoside phosphate binding	GO:1901265	4	1.18424e-11	1.16726	1122	3456	5067	18218	Solyc08g082460.4,Solyc11g008960.3,Solyc11g071610.2,Solyc07g047790.3,Solyc01g104970.3,Solyc11g071970.2,Solyc07g056350.3,Solyc02g063180.4,Solyc11g017270.2,Solyc12g099000.3,Solyc01g094960.3,Solyc01g007970.2,Solyc01g005560.3,Solyc10g079300.2,Solyc07g022790.4,Solyc06g083790.3,Solyc05g010260.4,Solyc10g011690.3,Solyc01g010030.3,Solyc11g013180.2,Solyc06g071810.1,Solyc03g111540.2,Solyc07g014650.3,Solyc02g…	2.07242e-09
Solyc03g118310.4	493	671	949	16	30	44	6.82436	9.21998	11.0597	0.222029	0.408995	0.627878	3.57e-31	-7.7798	Molecular function	purine ribonucleoside triphosphate binding	GO:0035639	5	2.63105e-11	1.18654	928	2812	5067	18218	Solyc08g082460.4,Solyc11g008960.3,Solyc07g047790.3,Solyc01g104970.3,Solyc11g071970.2,Solyc07g056350.3,Solyc11g017270.2,Solyc12g099000.3,Solyc01g094960.3,Solyc01g007970.2,Solyc10g079300.2,Solyc07g022790.4,Solyc06g083790.3,Solyc10g011690.3,Solyc01g010030.3,Solyc11g013180.2,Solyc06g071810.1,Solyc03g111540.2,Solyc07g014650.3,Solyc02g072470.4,Solyc12g009310.2,Solyc03g121610.3,Solyc11g072630.2,Solyc10g…	3.68347e-09
Solyc08g063090.2	728	435	1054	9	41	35	12.1574	7.1963	14.7916	0.145369	0.658541	0.599752	1.36e-19	-7.7709	Molecular function	ribonucleotide binding	GO:0032553	6	1.32907e-10	1.16791	1019	3137	5067	18218	Solyc08g082460.4,Solyc11g008960.3,Solyc07g047790.3,Solyc01g104970.3,Solyc11g071970.2,Solyc07g056350.3,Solyc11g017270.2,Solyc12g099000.3,Solyc01g094960.3,Solyc01g007970.2,Solyc10g079300.2,Solyc07g022790.4,Solyc06g083790.3,Solyc10g011690.3,Solyc01g010030.3,Solyc11g013180.2,Solyc06g071810.1,Solyc03g111540.2,Solyc07g014650.3,Solyc02g072470.4,Solyc12g009310.2,Solyc03g121610.3,Solyc11g072630.2,Solyc10g…	1.69155e-08
Solanum_lycopersicum_newGene_1098	38	51	52	0	3	0	1.6154	2.15521	1.8711	0	0.12643	0	1.78e-10	-7.76389	Molecular function	purine ribonucleotide binding	GO:0032555	7	1.58479e-10	1.16834	1008	3102	5067	18218	Solyc08g082460.4,Solyc11g008960.3,Solyc07g047790.3,Solyc01g104970.3,Solyc11g071970.2,Solyc07g056350.3,Solyc11g017270.2,Solyc12g099000.3,Solyc01g094960.3,Solyc01g007970.2,Solyc10g079300.2,Solyc07g022790.4,Solyc06g083790.3,Solyc10g011690.3,Solyc01g010030.3,Solyc11g013180.2,Solyc06g071810.1,Solyc03g111540.2,Solyc07g014650.3,Solyc02g072470.4,Solyc12g009310.2,Solyc03g121610.3,Solyc11g072630.2,Solyc10g…	1.84893e-08
Solyc01g079180.4	54	194	177	2	7	4	0.990444	3.53675	2.72627	0.036996	0.116757	0.061845	2.54e-13	-7.75824	Molecular function	purine nucleotide binding	GO:0017076	6	1.61712e-10	1.16802	1010	3109	5067	18218	Solyc08g082460.4,Solyc11g008960.3,Solyc07g047790.3,Solyc01g104970.3,Solyc11g071970.2,Solyc07g056350.3,Solyc11g017270.2,Solyc12g099000.3,Solyc01g094960.3,Solyc01g007970.2,Solyc10g079300.2,Solyc07g022790.4,Solyc06g083790.3,Solyc10g011690.3,Solyc01g010030.3,Solyc11g013180.2,Solyc06g071810.1,Solyc03g111540.2,Solyc07g014650.3,Solyc02g072470.4,Solyc12g009310.2,Solyc03g121610.3,Solyc11g072630.2,Solyc10g…	1.74151e-08
Solyc02g089350.3	4883	9513	11911	33	64	314	133.681	258.307	274.183	0.891225	1.70995	8.91001	1.59e-08	-7.75496	Molecular function	carbohydrate derivative binding	GO:0097367	3	1.63414e-10	1.16511	1036	3197	5067	18218	Solyc08g082460.4,Solyc11g008960.3,Solyc07g047790.3,Solyc01g104970.3,Solyc11g071970.2,Solyc07g056350.3,Solyc11g017270.2,Solyc12g099000.3,Solyc01g094960.3,Solyc01g007970.2,Solyc10g079300.2,Solyc07g022790.4,Solyc06g083790.3,Solyc10g055810.2,Solyc10g011690.3,Solyc01g010030.3,Solyc11g013180.2,Solyc06g071810.1,Solyc03g111540.2,Solyc07g014650.3,Solyc02g072470.4,Solyc12g009310.2,Solyc03g121610.3,Solyc11g…	1.63414e-08
Solyc12g011280.2	9091	11979	21646	229	602	892	234.68	306.696	469.827	5.95604	15.3096	23.88	3.56e-21	-7.69282	Molecular function	ATP binding	GO:0005524	9	2.90036e-10	1.18757	835	2528	5067	18218	Solyc08g082460.4,Solyc11g008960.3,Solyc07g047790.3,Solyc01g104970.3,Solyc11g071970.2,Solyc07g056350.3,Solyc11g017270.2,Solyc12g099000.3,Solyc01g094960.3,Solyc01g007970.2,Solyc10g079300.2,Solyc07g022790.4,Solyc06g083790.3,Solyc10g011690.3,Solyc01g010030.3,Solyc11g013180.2,Solyc06g071810.1,Solyc03g111540.2,Solyc02g072470.4,Solyc12g009310.2,Solyc03g121610.3,Solyc11g072630.2,Solyc10g086540.3,Solyc02g…	2.707e-08
Solyc06g064550.3	2167	1963	3135	29	141	129	19.0613	17.1231	23.1854	0.253356	1.21873	1.16956	2.28e-20	-7.66844	Molecular function	transferase activity	GO:0016740	3	6.18066e-10	1.14461	1190	3738	5067	18218	Solyc06g084570.4,Solyc08g082460.4,Solyc11g008960.3,Solyc07g056470.3,Solyc08g082340.3,Solyc11g007690.3,Solyc01g104970.3,Solyc11g071970.2,Solyc07g056350.3,Solyc11g017270.2,Solyc12g099000.3,Solyc01g094960.3,Solyc10g055680.1,Solyc01g007970.2,Solyc03g114730.3,Solyc10g011690.3,Solyc01g010030.3,Solyc02g077460.3,Solyc11g013180.2,Solyc06g071810.1,Solyc03g111540.2,Solyc02g072470.4,Solyc01g081340.4,Solyc05g…	5.40808e-08
Solyc08g067320.3	1464	1985	2666	43	92	139	146.157	196.603	223.851	4.26928	8.99787	14.3126	1.94e-27	-7.6244	Molecular function	adenyl nucleotide binding	GO:0030554	7	1.67063e-09	1.16749	917	2824	5067	18218	Solyc08g082460.4,Solyc11g008960.3,Solyc07g047790.3,Solyc01g104970.3,Solyc11g071970.2,Solyc07g056350.3,Solyc11g017270.2,Solyc12g099000.3,Solyc01g094960.3,Solyc01g007970.2,Solyc10g079300.2,Solyc07g022790.4,Solyc06g083790.3,Solyc10g011690.3,Solyc01g010030.3,Solyc11g013180.2,Solyc06g071810.1,Solyc03g111540.2,Solyc02g072470.4,Solyc12g009310.2,Solyc03g121610.3,Solyc11g072630.2,Solyc10g086540.3,Solyc02g…	1.37581e-07
Solyc06g054370.2	40	58	65	0	4	0	1.68478	2.4455	2.2985	0	0.149767	0	5.54e-10	-7.56742	Molecular function	adenyl ribonucleotide binding	GO:0032559	8	1.77333e-09	1.16743	915	2818	5067	18218	Solyc08g082460.4,Solyc11g008960.3,Solyc07g047790.3,Solyc01g104970.3,Solyc11g071970.2,Solyc07g056350.3,Solyc11g017270.2,Solyc12g099000.3,Solyc01g094960.3,Solyc01g007970.2,Solyc10g079300.2,Solyc07g022790.4,Solyc06g083790.3,Solyc10g011690.3,Solyc01g010030.3,Solyc11g013180.2,Solyc06g071810.1,Solyc03g111540.2,Solyc02g072470.4,Solyc12g009310.2,Solyc03g121610.3,Solyc11g072630.2,Solyc10g086540.3,Solyc02g…	1.37926e-07
Solyc02g070990.1	7297	16626	33685	43	32	373	252.097	569.684	978.491	1.4876	1.07907	13.3544	5.01e-07	-7.52879	Molecular function	structural constituent of ribosome	GO:0003735	3	2.98429e-09	1.4338	197	494	5067	18218	Solyc09g065330.3,Solyc06g083180.4,Solyc03g078290.3,Solyc06g082650.4,Solyc08g075090.4,Solyc08g065760.3,Solyc12g096300.2,Solyc06g065390.4,Solyc03g114050.3,Solyc06g066660.4,Solyc07g009330.4,Solyc12g008720.2,Solyc11g068820.3,Solyc10g061970.2,Solyc11g042610.2,Solyc07g063960.3,Solyc03g119040.3,Solyc09g090610.3,Solyc05g054070.4,Solyc06g076010.3,Solyc12g014390.3,Solyc07g062870.3,Solyc06g076620.3,Solyc06g…	2.19895e-07
Solyc06g083480.4	593	1151	1701	13	75	51	21.0952	40.6545	50.9303	0.448351	2.63133	1.8702	4.14e-16	-7.52593	Molecular function	endonuclease activity	GO:0004519	6	7.06916e-09	1.45852	172	424	5067	18218	Solyc01g090510.2,Solyc05g012920.3,Solyc01g080190.3,Solyc08g029150.3,Solyc03g080010.3,Solyc07g062820.1,Solyc03g114120.3,Solyc09g061790.1,Solyc10g008590.1,Solyc01g112020.3,Solyc11g062250.2,Solyc07g049160.4,Solyc05g041920.3,Solyc11g008530.3,Solyc04g009210.1,Solyc01g100340.4,Solyc02g093380.1,Solyc07g047620.3,Solyc03g033530.4,Solyc09g082400.2,Solyc02g082970.1,Solyc05g009140.3,Solyc01g079320.4,Solanum_…	4.94842e-07
Solyc08g014430.3	587	883	1265	25	77	23	6.92515	10.3293	12.5563	0.292391	0.895495	0.280286	6.03e-21	-7.48923	Molecular function	structural molecule activity	GO:0005198	2	9.0475e-07	1.32176	218	593	5067	18218	Solyc09g065330.3,Solyc06g083180.4,Solyc03g078290.3,Solyc06g082650.4,Solyc08g075090.4,Solyc08g065760.3,Solyc12g096300.2,Solyc06g065390.4,Solyc03g114050.3,Solyc06g066660.4,Solyc07g009330.4,Solyc12g008720.2,Solyc11g068820.3,Solyc10g061970.2,Solyc11g042610.2,Solyc07g063960.3,Solyc03g119040.3,Solyc09g090610.3,Solyc05g054070.4,Solyc06g076010.3,Solyc12g014390.3,Solyc06g005910.4,Solyc07g062870.3,Solyc06g…	6.03167e-05
Solyc09g075210.3	18704	6104	3521	399	419	407	580.088	187.748	91.7912	12.4809	12.8027	13.0807	9.64e-16	-7.45746	Molecular function	nuclease activity	GO:0004518	5	1.74131e-06	1.342	187	501	5067	18218	Solyc01g090510.2,Solyc05g012920.3,Solyc01g080190.3,Solyc08g029150.3,Solyc03g080010.3,Solyc07g062820.1,Solyc03g114120.3,Solyc09g092340.4,Solyc09g061790.1,Solyc10g008590.1,Solyc01g112020.3,Solyc11g062250.2,Solyc07g049160.4,Solyc05g041920.3,Solyc11g008530.3,Solyc04g009210.1,Solyc01g100340.4,Solyc02g093380.1,Solyc07g047620.3,Solyc03g033530.4,Solyc09g082400.2,Solyc02g082970.1,Solyc05g009140.3,Solyc01g…	0.000110811
Solyc12g044280.2	8961	12295	22219	269	586	1102	366.004	498.061	763.033	11.0755	23.5788	46.7119	2.51e-18	-7.38419	Molecular function	isomerase activity	GO:0016853	3	8.35054e-06	1.46813	98	240	5067	18218	Solyc01g111120.4,Solyc04g077640.4,Solyc02g085730.3,Solyc05g055760.3,Solyc03g007170.3,Solyc08g081930.3,Solyc03g025990.1,Solyc02g087770.3,Solyc03g113030.4,Solyc04g082660.2,Solyc04g054740.3,Solyc07g042630.4,Solyc12g014380.3,Solyc01g096520.3,Solyc10g039270.2,Solyc06g084260.3,Solyc04g045340.3,Solyc07g007110.4,Solyc08g061480.3,Solyc11g033284.1,Solyc05g012070.3,Solyc02g069620.4,Solyc01g091340.3,Solyc01g…	0.000508294
Solyc01g098740.4	1006	1598	2163	36	83	119	15.4715	24.3822	27.9695	0.550318	1.24576	1.89767	8.83e-23	-7.31517	Molecular function	protein serine/threonine kinase activity	GO:0004674	7	1.17015e-05	1.30308	191	527	5067	18218	Solyc11g008960.3,Solyc01g104970.3,Solyc07g056350.3,Solyc01g094960.3,Solyc06g071810.1,Solyc03g111540.2,Solyc02g072470.4,Solyc12g009310.2,Solyc11g072630.2,Solyc02g068540.2,Solyc02g031790.3,Solyc01g007120.3,Solyc03g117550.1,Solyc03g005130.3,Solyc05g008310.4,Solyc09g074250.3,Solyc03g026040.4,Solyc09g092460.4,Solyc01g098740.4,Solyc03g117180.3,Solyc03g082470.4,Solyc03g006080.4,Solyc03g031670.3,Solyc04g…	0.000682589
Solyc02g086820.3	26998	35007	99354	805	3379	2826	510.202	656.096	1578.57	15.3495	62.9263	55.4147	8.27e-15	-7.30663	Molecular function	chlorophyll binding	GO:0016168	5	1.67532e-05	1.95006	32	59	5067	18218	Solyc00g500206.1,Solyc06g069730.3,Solyc05g056050.3,Solyc02g070980.1,Solyc07g063600.3,Solyc00g500208.1,Solyc10g007690.3,Solyc08g067320.3,Solyc02g071030.2,Solyc12g009200.2,Solyc09g014520.3,Solyc08g067330.1,Solyc02g070970.1,Solyc12g006140.2,Solyc01g105030.3,Solyc02g070950.1,Solyc02g071000.1,Solyc03g005770.3,Solyc01g105050.3,Solyc03g005760.1,Solyc03g115900.4,Solyc07g022900.4,Solyc12g011280.2,Solyc02g…	0.000938178
Solyc01g090965.1	2279	3374	3693	74	128	267	81.2632	119.353	110.745	2.65616	4.47251	9.86259	8.72e-22	-7.28409	Molecular function	ion binding	GO:0043167	3	5.38163e-05	1.06371	1876	6341	5067	18218	Solyc07g045510.4,Solyc08g082460.4,Solyc11g008960.3,Solyc12g042480.3,Solyc11g071610.2,Solyc11g007690.3,Solyc02g086510.4,Solyc07g047790.3,Solyc01g104970.3,Solyc04g071140.3,Solyc11g071970.2,Solyc07g056350.3,Solyc02g063180.4,Solyc11g017270.2,Solyc12g099000.3,Solyc01g094960.3,Solyc01g007970.2,Solyc01g005560.3,Solyc10g079300.2,Solyc07g022790.4,Solyc06g084210.3,Solyc06g083790.3,Solyc02g085360.4,Solyc01g…	0.0028978
Solyc06g065970.1	261	2116	3301	23	93	81	18.8616	151.817	200.816	1.62645	6.58519	6.06162	4.65e-10	-7.23838	Molecular function	fructose 1,6-bisphosphate 1-phosphatase activity	GO:0042132	9	0.000128366	3.59542	7	7	5067	18218	Solyc10g086730.2,Solyc04g071340.5,Solyc01g106010.3,Solyc05g052600.4,Solyc09g011810.3,Solyc12g056530.2,Solyc10g086720.2,	0.00665604
Solyc08g067330.1	3615	4576	6547	63	213	432	335.54	421.303	510.946	5.87649	19.4422	41.5877	4.87e-14	-7.08929	Molecular function	catalytic activity, acting on a protein	GO:0140096	3	0.000148133	1.10236	864	2818	5067	18218	Solyc08g082460.4,Solyc11g008960.3,Solyc01g104970.3,Solyc11g071970.2,Solyc07g056350.3,Solyc11g017270.2,Solyc01g094960.3,Solyc01g007970.2,Solyc04g064750.2,Solyc03g025630.3,Solyc10g011690.3,Solyc01g010030.3,Solyc02g077460.3,Solyc06g071810.1,Solyc03g111540.2,Solyc04g077640.4,Solyc02g072470.4,Solyc12g062250.2,Solyc12g009310.2,Solyc03g121610.3,Solyc11g072630.2,Solyc07g020870.3,Solyc10g086540.3,Solyc02g…	0.00740664
Solyc11g006710.2	205	245	112	6	13	11	3.19043	3.77787	1.46687	0.085975	0.187733	0.172444	4.46e-17	-7.08294	Molecular function	microtubule binding	GO:0008017	6	0.000219227	1.56323	50	115	5067	18218	Solyc02g021360.3,Solyc02g084390.3,Solyc01g005330.3,Solyc06g075580.4,Solyc01g098080.3,Solyc07g042560.4,Solyc11g008350.2,Solyc02g068340.3,Solyc11g010560.3,Solyc12g014490.3,Solyc02g091780.1,Solyc10g008790.3,Solyc07g042580.3,Solyc01g110380.3,Solyc06g069130.4,Solyc07g064970.4,Solyc05g006550.4,Solyc01g110190.4,Solyc08g081100.4,Solyc03g120810.4,Solyc04g040110.3,Solyc11g072820.3,Solyc11g010920.3,Solyc09g…	0.0105834
Solyc03g120790.1	725	755	927	20	50	69	28.9624	29.9172	31.1149	0.779532	1.93099	2.82561	2.96e-25	-7.08018	Molecular function	microtubule motor activity	GO:0003777	3	0.000312859	1.71955	33	69	5067	18218	Solyc02g084390.3,Solyc06g075580.4,Solyc01g098080.3,Solyc07g042560.4,Solyc11g008350.2,Solyc02g068340.3,Solyc11g010560.3,Solyc02g091780.1,Solyc01g110380.3,Solyc06g069130.4,Solyc01g110190.4,Solyc08g081100.4,Solyc03g120810.4,Solyc04g040110.3,Solyc11g072820.3,Solyc11g010920.3,Solyc08g042040.4,Solyc10g054080.3,Solyc03g053080.3,Solyc12g011290.2,Solyc04g081060.3,Solyc07g064030.4,Solyc01g057310.4,Solyc01g…	0.0146001
Solyc02g071000.1	25719	40687	90381	174	322	1951	888.614	1394.18	2625.47	6.06393	10.9646	69.9491	1.39e-06	-7.06775	Molecular function	oxidoreductase activity, acting on CH-OH group of donors	GO:0016614	4	0.000317813	1.51682	54	128	5067	18218	Solyc02g063180.4,Solyc01g005560.3,Solyc05g010260.4,Solyc03g112070.4,Solyc04g071940.3,Solyc02g022930.3,Solyc03g115990.3,Solyc11g011930.3,Solyc12g044600.3,Solyc11g007990.2,Solyc04g016330.3,Solyc02g063190.2,Solyc03g121600.4,Solanum_lycopersicum_newGene_2480,Solyc02g086880.4,Solyc05g050120.3,Solyc02g093830.4,Solyc02g067930.3,Solyc12g099440.3,Solyc06g084460.4,Solyc12g010840.2,Solyc08g078850.3,Solyc08g…	0.0143529
Solyc07g063600.3	40811	54192	97024	1561	3570	5401	994.038	1309.05	1986.85	38.3558	85.6843	136.499	2.45e-19	-7.03919	Molecular function	RNA binding	GO:0003723	5	0.000330849	1.15718	383	1190	5067	18218	Solyc02g088790.3,Solyc02g086510.4,Solyc01g090510.2,Solyc05g012920.3,Solyc01g080190.3,Solyc03g078290.3,Solyc08g029150.3,Solyc04g081820.3,Solyc02g078120.2,Solyc07g062820.1,Solyc09g061790.1,Solyc10g008590.1,Solyc12g014210.3,Solyc01g080810.3,Solyc01g112020.3,Solyc11g062250.2,Solyc06g065390.4,Solyc06g066660.4,Solyc02g067210.3,Solyc10g051377.1,Solyc05g053780.4,Solyc11g008530.3,Solyc11g065320.2,Solyc03g…	0.0144746
Solyc03g121170.3	110	223	502	4	21	12	1.69217	3.42716	6.54078	0.052784	0.316807	0.186996	3.41e-11	-7.01219	Molecular function	cytoskeletal motor activity	GO:0003774	2	0.00033574	1.60646	42	94	5067	18218	Solyc07g063590.4,Solyc02g084390.3,Solyc03g007480.3,Solyc06g075580.4,Solyc09g064200.4,Solyc01g098080.3,Solyc07g042560.4,Solyc11g008350.2,Solyc02g068340.3,Solyc11g010560.3,Solyc02g091780.1,Solyc01g110380.3,Solyc06g069130.4,Solyc01g110190.4,Solyc08g081100.4,Solyc03g120810.4,Solyc04g040110.3,Solyc11g072820.3,Solyc11g010920.3,Solyc08g042040.4,Solyc10g054080.3,Solyc03g053080.3,Solyc12g011290.2,Solyc04g…	0.0142435
Solyc06g074200.4	44119	52118	80675	968	2646	5751	1810.19	2120.73	2782.92	40.0571	106.998	244.832	3.63e-14	-6.91943	Molecular function	translation regulator activity	GO:0045182	2	0.000337784	1.55478	48	111	5067	18218	Solyc03g034430.1,Solyc02g091220.1,Solyc02g078120.2,Solyc08g068340.3,Solyc02g082360.4,Solyc10g080660.3,Solyc01g044490.4,Solyc02g089070.3,Solyc09g098280.3,Solyc09g073000.3,Solyc01g011000.3,Solyc01g088370.3,Solyc06g062900.4,Solyc01g098000.3,Solyc11g069700.2,Solyc11g006660.3,Solyc08g074790.3,Solyc07g005830.3,Solyc12g098350.1,Solyc07g006130.3,Solyc06g008940.4,Solyc08g079490.4,Solyc07g042570.3,Solyc05g…	0.0139087
Solyc02g085770.4	5799	3727	3492	67	109	462	179.047	114.097	90.6262	2.06702	3.31234	14.7868	4.69e-11	-6.86923	Molecular function	oxidoreductase activity, acting on the CH-OH group of donors, NAD or NADP as acceptor	GO:0016616	5	0.000337784	1.55478	48	111	5067	18218	Solyc02g063180.4,Solyc01g005560.3,Solyc05g010260.4,Solyc03g112070.4,Solyc04g071940.3,Solyc02g022930.3,Solyc03g115990.3,Solyc11g011930.3,Solyc12g044600.3,Solyc11g007990.2,Solyc04g016330.3,Solyc02g063190.2,Solanum_lycopersicum_newGene_2480,Solyc02g086880.4,Solyc05g050120.3,Solyc02g093830.4,Solyc02g067930.3,Solyc12g099440.3,Solyc06g084460.4,Solyc12g010840.2,Solyc08g078850.3,Solyc08g013860.3,Solyc03g…	0.0139087
Solyc10g078580.1	1119	700	1116	44	81	79	168.45	104.512	141.285	6.57878	11.9865	12.3165	2.26e-34	-6.78907	Molecular function	translation factor activity, RNA binding	GO:0008135	6	0.000337784	1.55478	48	111	5067	18218	Solyc03g034430.1,Solyc02g091220.1,Solyc02g078120.2,Solyc08g068340.3,Solyc02g082360.4,Solyc10g080660.3,Solyc01g044490.4,Solyc02g089070.3,Solyc09g098280.3,Solyc09g073000.3,Solyc01g011000.3,Solyc01g088370.3,Solyc06g062900.4,Solyc01g098000.3,Solyc11g069700.2,Solyc11g006660.3,Solyc08g074790.3,Solyc07g005830.3,Solyc12g098350.1,Solyc07g006130.3,Solyc06g008940.4,Solyc08g079490.4,Solyc07g042570.3,Solyc05g…	0.0139087
Solyc06g074820.3	29008	39487	68045	1090	3550	3852	734.45	991.514	1448.45	27.8255	88.5908	101.194	2.82e-17	-6.74792	Molecular function	translation regulator activity, nucleic acid binding	GO:0090079	5	0.000337784	1.55478	48	111	5067	18218	Solyc03g034430.1,Solyc02g091220.1,Solyc02g078120.2,Solyc08g068340.3,Solyc02g082360.4,Solyc10g080660.3,Solyc01g044490.4,Solyc02g089070.3,Solyc09g098280.3,Solyc09g073000.3,Solyc01g011000.3,Solyc01g088370.3,Solyc06g062900.4,Solyc01g098000.3,Solyc11g069700.2,Solyc11g006660.3,Solyc08g074790.3,Solyc07g005830.3,Solyc12g098350.1,Solyc07g006130.3,Solyc06g008940.4,Solyc08g079490.4,Solyc07g042570.3,Solyc05g…	0.0139087
Solyc02g071020.3	127671	152816	250932	4616	9791	18819	2945.75	3496.82	4867.67	107.462	222.645	450.583	1.59e-16	-6.70043	Molecular function	intramolecular transferase activity	GO:0016866	4	0.000506162	1.76617	28	57	5067	18218	Solyc07g042630.4,Solyc04g045340.3,Solyc05g012070.3,Solyc06g071030.3,Solyc03g114860.4,Solyc02g081810.4,Solyc04g054820.3,Solyc02g093460.4,Solyc04g070980.4,Solyc04g072800.4,Solyc07g017260.2,Solyc01g097600.2,Solyc08g077260.3,Solyc12g006520.2,Solyc02g088460.4,Solyc11g017240.3,Solyc07g017250.4,Solyc05g026490.3,Solyc01g107580.4,Solyc04g009200.3,Solyc11g008360.3,Solyc01g103560.3,Solyc04g082130.4,Solyc02g…	0.0186481
Solyc12g017240.2	719	151	711	31	35	28	17.8228	3.71294	14.835	0.773818	0.841041	0.701586	6.25e-13	-6.68044	Molecular function	thiamine pyrophosphate binding	GO:0030976	5	0.000922778	2.69657	9	12	5067	18218	Solyc02g091100.3,Solyc04g005200.4,Solyc04g005190.2,Solyc04g011350.3,Solyc07g061940.4,Solyc02g077240.4,Solyc10g076510.2,Solyc03g044330.1,Solyc05g054640.4,	0.0331254
Solyc04g050730.3	3913	7487	14624	278	660	702	72.4517	137.486	227.668	5.17611	12.029	13.4831	2.82e-16	-6.67295	Molecular function	photoreceptor activity	GO:0009881	4	0.000922778	2.69657	9	12	5067	18218	Solyc05g053410.4,Solyc01g059870.4,Solyc12g057040.2,Solyc02g071260.3,Solyc05g018640.3,Solyc09g090100.3,Solyc11g072710.3,Solyc04g074180.4,Solyc07g045480.3,	0.0331254
Solyc05g005870.3	733	410	682	61	26	38	12.7066	7.05422	9.9481	1.06301	0.444109	0.671531	7.04e-22	-6.66528	Molecular function	quaternary ammonium group binding	GO:0050997	3	0.000922778	2.69657	9	12	5067	18218	Solyc02g091100.3,Solyc04g005200.4,Solyc04g005190.2,Solyc04g011350.3,Solyc07g061940.4,Solyc02g077240.4,Solyc10g076510.2,Solyc03g044330.1,Solyc05g054640.4,	0.0331254
Solyc10g011730.3	376	181	236	8	21	23	21.1824	10.0916	11.1658	0.447188	1.13783	1.29469	1.13e-15	-6.64007	Molecular function	ribosome binding	GO:0043022	5	0.00164294	2.09733	14	24	5067	18218	Solyc02g082360.4,Solyc11g008770.2,Solyc01g011000.3,Solyc12g096810.2,Solyc03g058880.4,Solyc07g042570.3,Solyc06g073090.3,Solyc03g063760.4,Solyc03g097370.4,Solyc03g115650.4,Solyc02g071280.3,Solyc04g009810.3,Solyc12g010060.2,Solyc07g066430.3,	0.0547647
Solyc07g047850.3	63375	85915	131101	2966	5728	10057	1749.12	2351.67	3042.1	82.5748	155.814	288.019	1.87e-18	-6.62167	Molecular function	molybdate ion transmembrane transporter activity	GO:0015098	7	0.001662	3.59542	5	5	5067	18218	Solyc03g082660.3,Solyc10g084680.1,Solyc08g066750.3,Solyc03g119930.1,Solyc02g092660.3,	0.0541118
Solyc11g071290.2	280	238	232	10	8	30	6.70342	5.6475	4.67241	0.2238	0.177394	0.735447	1.5e-14	-6.60267	Molecular function	NADP binding	GO:0050661	6	0.00172188	1.61533	31	69	5067	18218	Solyc05g010260.4,Solyc01g112140.4,Solyc04g009030.3,Solyc09g018790.3,Solyc02g022930.3,Solyc03g118640.3,Solyc09g074430.4,Solyc08g068160.2,Solyc06g064550.3,Solyc04g076870.4,Solyc03g115560.3,Solyc06g071920.4,Solyc03g121720.2,Solyc02g093830.4,Solyc02g020940.3,Solyc03g097910.4,Solyc10g006860.4,Solyc09g091840.4,Solyc04g082630.3,Solyc05g015950.3,Solyc02g085820.3,Solyc06g062310.3,Solyc07g045540.4,Solyc10g…	0.0547872
Solyc02g087860.3	84	91	172	0	7	10	4.08047	4.35003	7.01115	0	0.336085	0.488698	8.21e-09	-6.58397	Molecular function	tubulin binding	GO:0015631	5	0.00173799	1.43817	52	130	5067	18218	Solyc02g021360.3,Solyc09g009140.3,Solyc02g084390.3,Solyc01g005330.3,Solyc06g075580.4,Solyc01g098080.3,Solyc07g042560.4,Solyc11g008350.2,Solyc02g068340.3,Solyc11g010560.3,Solyc12g014490.3,Solyc02g091780.1,Solyc10g008790.3,Solyc07g042580.3,Solyc01g110380.3,Solyc06g069130.4,Solyc07g064970.4,Solyc05g006550.4,Solyc01g110190.4,Solyc08g081100.4,Solyc03g120810.4,Solyc12g005230.3,Solyc04g040110.3,Solyc11g…	0.0540708
Solyc01g111660.4	7011	8785	16307	394	773	1066	176.841	219.781	345.843	10.008	19.2103	27.8977	2.25e-20	-6.58189	Molecular function	vitamin binding	GO:0019842	4	0.00243254	1.37938	61	159	5067	18218	Solyc04g071140.3,Solyc09g064430.4,Solyc07g055210.3,Solyc06g054490.3,Solyc02g091100.3,Solyc07g053720.3,Solyc08g068340.3,Solyc08g048450.4,Solyc07g066480.3,Solyc03g123600.4,Solyc08g006750.4,Solyc05g013380.3,Solyc10g006240.3,Solyc03g065340.3,Solyc04g005200.4,Solyc04g005190.2,Solyc08g083110.4,Solyc03g025500.4,Solyc09g074970.3,Solyc08g081535.1,Solyc07g062810.4,Solyc04g054310.3,Solyc04g011350.3,Solyc08g…	0.0740338
Solyc01g087710.2	808	489	855	48	72	44	25.0153	15.0026	22.2606	1.49277	2.1892	1.39849	2.16e-33	-6.58158	Molecular function	rRNA methyltransferase activity	GO:0008649	7	0.00265161	2.79644	7	9	5067	18218	Solyc06g072250.3,Solyc01g100430.3,Solyc01g091800.3,Solyc11g020820.2,Solyc11g020810.2,Solyc02g084730.3,Solyc03g113860.2,	0.0789841
Solyc02g070180.3	164	111	169	0	11	12	2.83073	1.89817	2.44898	0	0.175078	0.199899	5.51e-09	-6.56303	Molecular function	catalytic activity, acting on a rRNA	GO:0140102	5	0.00265161	2.79644	7	9	5067	18218	Solyc06g072250.3,Solyc01g100430.3,Solyc01g091800.3,Solyc11g020820.2,Solyc11g020810.2,Solyc02g084730.3,Solyc03g113860.2,	0.0789841
Solyc12g040790.2	19968	17396	23278	511	1459	2243	298.568	257.965	292.626	7.70174	21.4914	34.7936	1.25e-16	-6.5276	Molecular function	sugar-phosphatase activity	GO:0050308	8	0.00265161	2.79644	7	9	5067	18218	Solyc10g086730.2,Solyc04g071340.5,Solyc01g106010.3,Solyc05g052600.4,Solyc09g011810.3,Solyc12g056530.2,Solyc10g086720.2,	0.0789841
Solyc04g054740.3	3042	3669	8825	141	485	411	43.1665	51.6349	105.285	2.01035	6.77815	6.05015	1.21e-14	-6.51862	Molecular function	ribonucleoprotein complex binding	GO:0043021	4	0.00270212	1.7559	21	43	5067	18218	Solyc07g047670.3,Solyc02g082360.4,Solyc11g008770.2,Solyc01g011000.3,Solyc12g009990.2,Solyc01g103720.4,Solyc02g088780.4,Solyc12g096810.2,Solyc03g058880.4,Solyc07g042570.3,Solyc06g073090.3,Solyc06g053800.3,Solyc03g063760.4,Solyc11g011780.3,Solyc03g097370.4,Solyc03g115650.4,Solyc02g071280.3,Solyc04g009810.3,Solyc03g093970.3,Solyc12g010060.2,Solyc07g066430.3,	0.0756595
Solyc10g083300.2	1939	1407	1706	66	166	167	18.0001	12.9517	13.3145	0.609358	1.51349	1.60719	1.77e-24	-6.43211	Molecular function	peptidyl-prolyl cis-trans isomerase activity	GO:0003755	5	0.00465272	1.55623	29	67	5067	18218	Solyc04g077640.4,Solyc03g007170.3,Solyc04g082660.2,Solyc01g096520.3,Solyc10g039270.2,Solyc07g007110.4,Solyc11g033284.1,Solyc01g091340.3,Solyc01g111170.3,Solyc04g077620.1,Solyc01g108340.3,Solyc11g067090.2,Solyc03g119860.3,Solyc10g078250.1,Solyc06g083190.4,Solyc04g015040.3,Solyc09g092690.3,Solyc08g067090.4,Solyc10g005870.4,Solyc02g086910.4,Solyc08g006540.4,Solyc01g008280.4,Solyc12g013580.3,Solyc04g…	0.127722
Solyc02g071010.1	77615	100443	212804	1342	2557	10262	2681.73	3441.83	6181.73	46.7652	87.0653	367.926	2.4e-06	-6.41916	Molecular function	signaling receptor binding	GO:0005102	4	0.00512208	1.6051	25	56	5067	18218	Solyc01g104970.3,Solyc02g092120.3,Solyc01g099520.3,Solyc07g055260.3,Solyc03g043770.4,Solyc01g067900.3,Solyc06g068520.3,Solanum_lycopersicum_newGene_1221,Solyc11g017460.3,Solyc01g107250.3,Solyc02g080610.4,Solyc12g005230.3,Solyc07g007270.3,Solyc10g047140.2,Solyc12g042760.1,Solyc06g084420.1,Solyc05g010000.1,Solyc04g054480.3,Solyc12g098510.1,Solyc04g072570.3,Solyc09g074260.1,Solyc01g107290.3,Solyc08g…	0.137902
Solyc04g017720.3	2441	2583	2412	119	127	318	119.105	125.005	98.9522	5.85937	6.0613	16.0984	4.72e-20	-6.41693	Molecular function	signaling receptor activity	GO:0038023	3	0.0053445	1.48047	35	85	5067	18218	Solyc01g104970.3,Solyc02g068540.2,Solyc05g014160.4,Solyc06g061180.2,Solyc09g090970.4,Solyc12g096960.2,Solyc10g076410.1,Solyc05g053410.4,Solyc01g059870.4,Solyc08g076960.1,Solyc01g107250.3,Solyc07g056580.3,Solyc03g095780.3,Solyc12g057040.2,Solyc09g005000.1,Solyc02g071260.3,Solyc09g091000.4,Solyc05g018640.3,Solyc09g090100.3,Solyc02g077290.2,Solyc10g047140.2,Solyc06g084420.1,Solyc09g090990.2,Solyc09g…	0.141175
Solyc10g150149.1	68	70	117	0	0	8	4.89083	4.95832	7.08097	0	0	0.598221	4.48e-06	-6.40425	Molecular function	carbohydrate phosphatase activity	GO:0019203	7	0.00564533	2.08156	11	19	5067	18218	Solyc03g007290.4,Solyc08g079060.4,Solyc10g086730.2,Solyc04g071340.5,Solyc01g106010.3,Solyc03g083960.3,Solyc05g052600.4,Solyc09g011810.3,Solyc12g056530.2,Solyc10g086720.2,Solyc11g007830.2,	0.14636
Solyc12g011450.2	91429	109263	165771	3521	7980	15037	2447.47	2900.73	3730.82	95.0788	210.551	417.701	4.58e-15	-6.371	Molecular function	oxidoreductase activity, acting on the CH-CH group of donors	GO:0016627	4	0.00581035	1.5488	28	65	5067	18218	Solyc10g008110.4,Solyc10g005110.3,Solyc10g076600.2,Solyc01g087290.3,Solyc08g078390.4,Solyc03g111360.3,Solyc03g115980.1,Solyc01g005330.3,Solyc01g008930.4,Solyc05g054490.3,Solyc03g026210.4,Solyc03g123760.3,Solyc06g068970.3,Solyc03g118830.3,Solyc02g030170.4,Solyc03g097910.4,Solyc11g007000.2,Solyc04g054890.3,Solyc03g044470.4,Solyc03g044720.2,Solyc12g013710.2,Solyc01g079090.4,Solyc09g011870.3,Solyc11g…	0.1479
Solyc12g013710.2	48242	53768	96946	896	2652	8406	933.423	1031.76	1577.06	17.4851	50.5723	168.765	2.59e-09	-6.34457	Molecular function	hydrolase activity	GO:0016787	3	0.00635666	1.0662	927	3126	5067	18218	Solyc06g082280.3,Solyc12g055740.2,Solyc02g065590.3,Solyc01g110340.4,Solyc01g090510.2,Solyc05g012920.3,Solyc01g091160.4,Solyc10g055810.2,Solyc04g064750.2,Solyc03g025630.3,Solyc04g077640.4,Solyc01g080190.3,Solyc12g062250.2,Solyc10g086170.1,Solyc03g019890.3,Solanum_lycopersicum_newGene_2383,Solyc10g086540.3,Solyc08g029150.3,Solyc08g062820.3,Solyc03g081270.2,Solyc03g080010.3,Solyc05g053600.3,Solyc11g…	0.158916
Solyc03g005900.4	1592	2802	3388	121	152	328	36.3027	63.3695	64.9581	2.76463	3.40208	7.74571	1.52e-17	-6.30245	Molecular function	molecular transducer activity	GO:0060089	2	0.006642	1.46325	35	86	5067	18218	Solyc01g104970.3,Solyc02g068540.2,Solyc05g014160.4,Solyc06g061180.2,Solyc09g090970.4,Solyc12g096960.2,Solyc10g076410.1,Solyc05g053410.4,Solyc01g059870.4,Solyc08g076960.1,Solyc01g107250.3,Solyc07g056580.3,Solyc03g095780.3,Solyc12g057040.2,Solyc09g005000.1,Solyc02g071260.3,Solyc09g091000.4,Solyc05g018640.3,Solyc09g090100.3,Solyc02g077290.2,Solyc10g047140.2,Solyc06g084420.1,Solyc09g090990.2,Solyc09g…	0.163137
Solyc05g043330.3	991	638	1413	70	102	90	20.428	13.0296	24.4972	1.44107	2.0637	1.91522	4.14e-29	-6.25472	Molecular function	carbohydrate binding	GO:0030246	3	0.00666258	1.27945	79	222	5067	18218	Solyc03g019890.3,Solyc06g054490.3,Solyc09g092160.2,Solyc08g081930.3,Solyc02g087770.3,Solyc06g076120.2,Solyc03g113030.4,Solyc02g078170.3,Solyc12g014380.3,Solyc11g006740.3,Solyc02g068300.3,Solyc03g113520.3,Solyc03g062720.3,Solyc12g036330.1,Solyc05g006680.4,Solyc09g098040.3,Solyc03g121300.2,Solyc03g121540.3,Solyc06g062580.3,Solyc04g081400.3,Solyc02g086270.4,Solyc09g014400.3,Solyc12g055970.3,Solyc02g…	0.160821
Solyc09g065350.1	66	72	140	2	10	7	3.71765	4.0169	6.60607	0.098616	0.55428	0.352637	1.67e-10	-6.25314	Molecular function	exopeptidase activity	GO:0008238	5	0.00676071	1.43083	39	98	5067	18218	Solyc04g064750.2,Solyc03g025630.3,Solyc04g077640.4,Solyc02g091950.4,Solyc05g050770.4,Solyc10g049270.2,Solyc11g066520.3,Solyc01g010710.4,Solyc04g082120.3,Solyc12g010040.2,Solyc02g062970.3,Solyc01g099110.4,Solyc11g044310.2,Solyc01g087970.3,Solyc04g077620.1,Solyc05g041540.4,Solyc03g025610.3,Solyc10g049210.3,Solyc07g005960.3,Solyc04g077670.3,Solyc12g088250.2,Solyc07g007250.4,Solyc04g079040.4,Solyc04g…	0.160424
Solyc02g070940.1	128640	162186	260231	8707	15054	21922	4444.72	5557.55	7559.46	303.555	512.666	786.003	8.74e-22	-6.23994	Molecular function	phosphatidylinositol phospholipase C activity	GO:0004435	8	0.00752136	2.69657	6	8	5067	18218	Solyc05g052760.4,Solyc03g096070.3,Solyc06g082000.4,Solyc10g076710.3,Solyc06g051620.3,Solyc09g075420.3,	0.175498
Solyc02g069450.3	10161	11978	21475	357	1145	1772	315.468	368.822	560.586	11.1567	35.0313	57.0858	1.32e-12	-6.20695	Molecular function	phospholipase C activity	GO:0004629	7	0.00752136	2.69657	6	8	5067	18218	Solyc05g052760.4,Solyc03g096070.3,Solyc06g082000.4,Solyc10g076710.3,Solyc06g051620.3,Solyc09g075420.3,	0.175498
Solyc03g116280.3	130	252	293	8	17	27	4.80782	9.24874	9.09551	0.27863	0.584237	1.02042	2.15e-13	-6.19009	Molecular function	adenylate kinase activity	GO:0004017	8	0.00752136	2.69657	6	8	5067	18218	Solyc06g065270.4,Solyc09g007180.3,Solyc11g072410.2,Solyc12g010380.3,Solyc06g075310.4,Solyc05g014980.4,	0.175498
Solyc07g032490.3	1160	770	760	34	82	110	15.3968	10.1277	8.47125	0.445604	1.06997	1.51361	1.8e-16	-6.17105	Molecular function	cis-trans isomerase activity	GO:0016859	4	0.00763327	1.51112	29	69	5067	18218	Solyc04g077640.4,Solyc03g007170.3,Solyc04g082660.2,Solyc01g096520.3,Solyc10g039270.2,Solyc07g007110.4,Solyc11g033284.1,Solyc01g091340.3,Solyc01g111170.3,Solyc04g077620.1,Solyc01g108340.3,Solyc11g067090.2,Solyc03g119860.3,Solyc10g078250.1,Solyc06g083190.4,Solyc04g015040.3,Solyc09g092690.3,Solyc08g067090.4,Solyc10g005870.4,Solyc02g086910.4,Solyc08g006540.4,Solyc01g008280.4,Solyc12g013580.3,Solyc04g…	0.169628
Solyc03g113910.3	62	279	502	11	20	23	2.15397	9.71831	14.8202	0.359121	0.683579	0.827238	1.43e-08	-6.15361	Molecular function	transketolase or transaldolase activity	GO:0016744	4	0.0112728	2.21257	8	13	5067	18218	Solyc10g018300.3,Solyc11g010850.2,Solyc01g067890.4,Solyc04g005200.4,Solyc04g005190.2,Solyc07g061940.4,Solyc03g044330.1,Solyc05g050970.4,	0.246593
Solyc12g010800.2	148	230	348	8	12	33	4.42693	6.81708	8.74566	0.214273	0.328019	0.995801	6.47e-11	-6.14627	Molecular function	pseudouridine synthase activity	GO:0009982	5	0.0115352	1.87587	12	23	5067	18218	Solyc02g081810.4,Solyc02g093460.4,Solyc07g017260.2,Solyc01g097600.2,Solyc07g017250.4,Solyc01g107580.4,Solyc11g008360.3,Solyc01g103560.3,Solyc04g082130.4,Solyc02g080320.4,Solyc04g081910.4,Solyc04g082070.4,	0.24845
Solanum_lycopersicum_newGene_794	1130	942	1274	66	64	157	37.9764	31.3809	36.0036	2.20749	2.09624	5.45885	2.56e-19	-6.13961	Molecular function	polysaccharide binding	GO:0030247	4	0.0115376	1.50776	26	62	5067	18218	Solyc06g076120.2,Solyc12g036330.1,Solyc09g098040.3,Solyc02g086270.4,Solyc09g014400.3,Solyc02g091530.4,Solyc03g119230.1,Solyc02g086210.4,Solyc04g005420.4,Solyc03g119240.3,Solyc02g078750.3,Solyc11g007430.3,Solyc02g079590.3,Solyc02g079600.3,Solyc09g014740.3,Solanum_lycopersicum_newGene_964,Solyc02g020980.4,Solyc02g081480.4,Solyc10g076550.1,Solyc05g012380.3,Solyc11g007410.3,Solyc09g014720.3,Solyc02g0…	0.244736
Solyc05g051580.3	627	566	799	39	100	38	8.42851	7.5403	9.02696	0.51743	1.32561	0.528521	1.51e-20	-6.13464	Molecular function	transaminase activity	GO:0008483	5	0.0116817	1.6265	19	42	5067	18218	Solyc07g055210.3,Solyc07g053720.3,Solyc08g068340.3,Solyc08g048450.4,Solyc03g123600.4,Solyc04g054310.3,Solyc08g048460.2,Solyc12g099930.2,Solyc06g063090.4,Solyc07g053710.3,Solyc03g043880.3,Solyc07g043310.3,Solyc04g054710.3,Solyc10g008200.4,Solyc10g007110.3,Solyc10g076250.2,Solyc04g009200.3,Solyc08g068330.3,Solyc02g080810.3,	0.244096
Solyc05g007010.3	227	285	265	16	12	37	3.66701	4.57665	3.60344	0.257046	0.189603	0.615117	1.1e-15	-6.11097	Molecular function	transferase activity, transferring nitrogenous groups	GO:0016769	4	0.0116817	1.6265	19	42	5067	18218	Solyc07g055210.3,Solyc07g053720.3,Solyc08g068340.3,Solyc08g048450.4,Solyc03g123600.4,Solyc04g054310.3,Solyc08g048460.2,Solyc12g099930.2,Solyc06g063090.4,Solyc07g053710.3,Solyc03g043880.3,Solyc07g043310.3,Solyc04g054710.3,Solyc10g008200.4,Solyc10g007110.3,Solyc10g076250.2,Solyc04g009200.3,Solyc08g068330.3,Solyc02g080810.3,	0.244096
Solyc04g074310.4	63	145	309	7	11	18	1.23022	2.79645	5.07748	0.134927	0.208053	0.35903	5.54e-09	-6.06015	Molecular function	translation elongation factor activity	GO:0003746	7	0.0117556	1.73972	15	31	5067	18218	Solyc01g044490.4,Solyc09g073000.3,Solyc01g011000.3,Solyc01g098000.3,Solyc11g069700.2,Solyc06g008940.4,Solyc11g150146.1,Solyc06g009970.3,Solyc11g069097.1,Solyc03g115650.4,Solyc06g071790.3,Solyc12g010060.2,Solyc06g011280.3,Solyc12g011270.2,Solyc01g090690.4,	0.23852
Solyc10g006230.3	145451	184448	298358	7250	20799	25705	3571.14	4491.24	6158.75	179.595	503.334	654.925	3.16e-15	-6.05548	Molecular function	pyrophosphatase activity	GO:0016462	6	0.015292	1.16694	148	456	5067	18218	Solyc03g080010.3,Solyc05g053600.3,Solyc10g047050.2,Solyc05g053590.4,Solyc12g070270.2,Solyc12g014080.2,Solyc10g008840.3,Solyc01g109110.3,Solyc07g053470.4,Solyc01g111920.3,Solyc10g086350.2,Solyc05g055330.3,Solyc09g008000.3,Solyc05g018510.3,Solyc11g067300.2,Solyc11g012460.3,Solyc06g005910.4,Solyc01g096220.3,Solyc11g069090.2,Solyc12g011130.2,Solyc08g076720.4,Solyc03g122070.3,Solyc09g073000.3,Solyc03g…	0.305839
Solyc07g052980.3	5428	11407	21139	414	1120	1486	133.03	277.262	435.561	10.231	27.0367	37.7812	1.88e-11	-6.02952	Molecular function	intramolecular oxidoreductase activity	GO:0016860	4	0.0155733	1.58867	19	43	5067	18218	Solyc01g111120.4,Solyc02g085730.3,Solyc05g055760.3,Solyc12g014380.3,Solyc02g069620.4,Solyc01g100320.3,Solyc01g097460.3,Solyc11g069690.3,Solyc04g081740.3,Solyc04g076100.4,Solyc04g049450.3,Solyc04g074240.3,Solyc02g063220.3,Solyc08g022210.4,Solyc10g054870.3,Solyc09g091830.4,Solyc03g120720.3,Solyc07g056390.4,Solyc01g108200.3,	0.30708
Solyc10g086720.2	79	70	84	5	5	10	2.29261	2.01595	2.04824	0.14542	0.139353	0.288562	1.93e-13	-5.99853	Molecular function	RNA methyltransferase activity	GO:0008173	6	0.0155733	1.58867	19	43	5067	18218	Solyc03g005010.4,Solyc12g005280.3,Solyc01g080480.4,Solyc02g068650.2,Solyc01g086900.4,Solyc09g014320.4,Solyc06g072250.3,Solyc01g100430.3,Solyc05g051520.3,Solyc01g091800.3,Solyc11g020820.2,Solyc11g010900.2,Solyc01g107040.3,Solyc11g020810.2,Solyc02g084730.3,Solyc08g077850.2,Solyc02g070030.4,Solyc04g072390.3,Solyc03g113860.2,	0.30708
Solyc03g115900.4	107581	127046	208615	3563	9925	21805	2447.38	2866.35	3990.03	81.7791	222.528	514.755	1.53e-10	-5.98217	Molecular function	ribonucleoside triphosphate phosphatase activity	GO:0017111	7	0.0169545	1.17021	138	424	5067	18218	Solyc03g080010.3,Solyc05g053600.3,Solyc10g047050.2,Solyc05g053590.4,Solyc12g070270.2,Solyc12g014080.2,Solyc10g008840.3,Solyc01g109110.3,Solyc07g053470.4,Solyc01g111920.3,Solyc10g086350.2,Solyc05g055330.3,Solyc09g008000.3,Solyc05g018510.3,Solyc11g067300.2,Solyc11g012460.3,Solyc06g005910.4,Solyc01g096220.3,Solyc11g069090.2,Solyc12g011130.2,Solyc08g076720.4,Solyc03g122070.3,Solyc09g073000.3,Solyc03g…	0.325154
Solyc01g005590.2	503	707	710	52	27	91	32.7778	45.6426	38.8632	3.40749	1.70984	6.11848	1.6e-15	-5.97921	Molecular function	GTPase activity	GO:0003924	8	0.0171725	1.25214	70	201	5067	18218	Solyc10g047050.2,Solyc12g014080.2,Solyc10g008840.3,Solyc01g109110.3,Solyc07g053470.4,Solyc10g086350.2,Solyc11g012460.3,Solyc06g005910.4,Solyc01g096220.3,Solyc12g011130.2,Solyc09g073000.3,Solyc03g119290.3,Solyc04g077020.3,Solyc01g005330.3,Solyc08g005310.4,Solyc12g035420.3,Solyc06g005810.3,Solyc12g009990.2,Solyc09g065130.4,Solyc07g064290.3,Solyc04g081490.3,Solyc11g069700.2,Solyc11g073050.2,Solyc07g…	0.324885
Solyc08g006930.3	20321	23445	35598	1003	2103	3883	838.731	959.689	1235.3	41.7474	85.5389	166.286	2.29e-14	-5.96511	Molecular function	oxidoreductase activity, acting on the CH-CH group of donors, oxygen as acceptor	GO:0016634	5	0.0172609	2.39695	6	9	5067	18218	Solyc10g008110.4,Solyc10g005110.3,Solyc08g078390.4,Solyc03g111360.3,Solyc04g054890.3,Solyc01g079090.4,	0.322203
Solyc08g068480.1	130	141	194	8	13	22	15.055	16.2115	18.9596	0.911723	1.46166	2.5989	5.9e-16	-5.91712	Molecular function	oxidoreductase activity, acting on paired donors, with oxidation of a pair of donors resulting in the reduction of molecular oxygen to two molecules of water	GO:0016717	5	0.0173194	1.79771	12	24	5067	18218	Solyc12g045037.1,Solyc04g040120.1,Solyc06g053480.3,Solyc03g116730.4,Solyc12g049030.1,Solyc12g100250.3,Solyc11g008680.2,Solyc10g009030.4,Solyc03g058430.3,Solyc06g051400.3,Solyc04g040130.1,Solyc12g045035.1,	0.319041
Solyc02g085490.2	117	235	422	15	28	25	2.8511	5.71376	8.71748	0.362676	0.654478	0.627508	5.01e-12	-5.87668	Molecular function	translation initiation factor activity	GO:0003743	7	0.0182913	1.43817	28	70	5067	18218	Solyc03g034430.1,Solyc02g091220.1,Solyc02g078120.2,Solyc08g068340.3,Solyc02g082360.4,Solyc10g080660.3,Solyc02g089070.3,Solyc09g098280.3,Solyc01g088370.3,Solyc06g062900.4,Solyc08g074790.3,Solyc07g005830.3,Solyc12g098350.1,Solyc07g042570.3,Solyc05g052180.3,Solyc11g013440.2,Solyc06g076150.3,Solyc10g079880.2,Solyc07g064150.4,Solyc03g115650.4,Solyc03g095840.3,Solyc11g017070.2,Solyc01g111200.3,Solyc08g…	0.332569
Solyc03g116060.4	88	234	362	11	22	25	3.56302	9.4649	12.4152	0.426225	0.86053	1.04117	4.06e-10	-5.83697	Molecular function	hydrolase activity, acting on acid anhydrides, in phosphorus-containing anhydrides	GO:0016818	5	0.0196609	1.15732	150	466	5067	18218	Solyc03g080010.3,Solyc05g053600.3,Solyc10g047050.2,Solyc05g053590.4,Solyc12g070270.2,Solyc12g014080.2,Solyc10g008840.3,Solyc01g109110.3,Solyc07g053470.4,Solyc01g111920.3,Solyc10g086350.2,Solyc05g055330.3,Solyc09g008000.3,Solyc05g018510.3,Solyc11g067300.2,Solyc11g012460.3,Solyc06g005910.4,Solyc01g096220.3,Solyc11g069090.2,Solyc12g011130.2,Solyc08g076720.4,Solyc03g122070.3,Solyc09g073000.3,Solyc03g…	0.352888
Solyc01g079830.3	176	152	81	11	11	16	6.6922	5.72623	2.57176	0.415649	0.39799	0.621395	4.4e-12	-5.83135	Molecular function	hydroxymethyl-, formyl- and related transferase activity	GO:0016742	5	0.0199532	2.05453	8	14	5067	18218	Solyc06g060770.3,Solyc02g091290.3,Solyc02g091560.3,Solyc12g098490.2,Solyc05g053810.3,Solyc08g065490.3,Solyc09g007130.3,Solyc02g080810.3,	0.353601
Solyc12g009650.2	10475	29195	42616	774	2292	3751	309.884	856.575	1059.96	23.0787	66.8261	115.155	2.27e-09	-5.82359	Molecular function	receptor serine/threonine kinase binding	GO:0033612	5	0.0199532	2.05453	8	14	5067	18218	Solyc03g043770.4,Solyc11g017460.3,Solyc01g107250.3,Solyc12g042760.1,Solyc06g084420.1,Solyc04g054480.3,Solyc09g074260.1,Solyc08g042100.3,	0.353601
Solyc03g013340.3	243	378	713	13	36	63	6.70815	10.3557	16.546	0.35887	0.959084	1.77946	1.26e-09	-5.8187	Molecular function	isocitrate dehydrogenase [NAD(P)+] activity	GO:0004448	6	0.0206602	2.56816	5	7	5067	18218	Solyc01g005560.3,Solyc11g011930.3,Solyc02g086610.4,Solyc08g077920.3,Solyc10g074500.2,	0.357089
Solyc04g015620.3	488	892	1635	73	96	121	9.96431	18.081	28.085	1.48572	1.9246	2.54835	1.86e-15	-5.7977	Molecular function	3-hydroxyacyl-CoA dehydrogenase activity	GO:0003857	6	0.0206602	2.56816	5	7	5067	18218	Solyc12g099440.3,Solyc07g019670.4,Solyc01g066620.4,Solyc12g007170.3,Solyc08g068390.3,	0.357089
Solanum_lycopersicum_newGene_2399	1112	14114	31296	73	173	707	15.2598	192.191	361.292	0.999913	2.33322	10.0625	0.000211111	-5.794	Molecular function	phosphatase regulator activity	GO:0019208	4	0.0209929	1.52997	20	47	5067	18218	Solyc06g061180.2,Solyc09g090970.4,Solyc12g096960.2,Solyc10g076410.1,Solyc08g076960.1,Solyc12g006920.2,Solyc06g065690.3,Solyc03g095780.3,Solyc05g014340.3,Solyc02g081140.3,Solyc10g083920.2,Solyc09g091000.4,Solyc02g067980.3,Solyc01g008280.4,Solyc09g090990.2,Solyc02g093790.3,Solyc02g093800.3,Solyc02g093810.3,Solyc05g054380.2,Solyc09g090980.3,	0.354097
Solyc02g091690.3	35	59	80	0	6	6	0.788637	1.34885	1.53248	0	0.134481	0.127061	1.08e-06	-5.79276	Molecular function	phospholipase activity	GO:0004620	6	0.0218172	1.49244	22	53	5067	18218	Solyc05g052760.4,Solyc03g096070.3,Solyc02g077160.3,Solyc04g079250.3,Solyc12g010910.2,Solyc04g082000.4,Solyc02g077100.3,Solyc08g080130.3,Solyc06g082000.4,Solyc08g066800.4,Solyc08g066790.4,Solyc10g076710.3,Solyc06g051620.3,Solyc02g077420.3,Solyc02g077430.4,Solyc01g008780.3,Solyc01g079600.4,Solyc09g075420.3,Solyc07g055160.4,Solyc02g077140.3,Solyc02g083340.4,Solyc08g078440.3,	0.328431
Solyc06g005910.4	328	278	479	22	50	40	5.86178	4.93105	7.21452	0.381194	0.878815	0.742803	8.24e-21	-5.78651	Molecular function	serine-type exopeptidase activity	GO:0070008	6	0.0222671	1.40902	29	74	5067	18218	Solyc04g064750.2,Solyc03g025630.3,Solyc04g077640.4,Solyc05g050770.4,Solyc10g049270.2,Solyc11g066520.3,Solyc01g010710.4,Solyc04g082120.3,Solyc01g087970.3,Solyc04g077620.1,Solyc05g041540.4,Solyc03g025610.3,Solyc10g049210.3,Solyc07g005960.3,Solyc04g077670.3,Solyc12g088250.2,Solyc04g079040.4,Solyc04g015340.3,Solyc05g041530.3,Solyc01g108480.1,Solyc01g108490.3,Solyc03g118370.3,Solyc02g090180.3,Solyc04g…	0.331638
Solyc06g063370.3	173166	189158	323562	6961	17850	36956	3472.41	3761.78	5454.93	140.832	352.801	769.006	1.07e-10	-5.76967	Molecular function	carboxypeptidase activity	GO:0004180	6	0.022365	1.41791	28	71	5067	18218	Solyc04g064750.2,Solyc04g077640.4,Solyc02g091950.4,Solyc05g050770.4,Solyc10g049270.2,Solyc11g066520.3,Solyc01g010710.4,Solyc01g087970.3,Solyc04g077620.1,Solyc05g041540.4,Solyc10g049210.3,Solyc07g005960.3,Solyc04g077670.3,Solyc12g088250.2,Solyc07g007250.4,Solyc04g079040.4,Solyc04g015340.3,Solyc05g041530.3,Solyc01g108480.1,Solyc01g108490.3,Solyc03g118370.3,Solyc04g077650.3,Solyc12g099160.2,Solyc02g…	0.329589
Solyc12g009070.1	1401	1657	2456	44	138	299	169.312	198.647	249.695	5.29336	16.3506	37.499	1.82e-09	-5.75437	Molecular function	abscisic acid binding	GO:0010427	7	0.0223954	1.79771	11	22	5067	18218	Solyc06g061180.2,Solyc09g090970.4,Solyc12g096960.2,Solyc10g076410.1,Solyc08g076960.1,Solyc03g095780.3,Solyc09g091000.4,Solyc09g090990.2,Solyc12g095970.3,Solyc05g054380.2,Solyc09g090980.3,	0.3266
Solyc06g069730.3	5103	11712	26374	31	118	882	140.696	320.25	611.37	0.840231	3.18403	25.2275	0.000214609	-5.74953	Molecular function	isoprenoid binding	GO:0019840	4	0.0223954	1.79771	11	22	5067	18218	Solyc06g061180.2,Solyc09g090970.4,Solyc12g096960.2,Solyc10g076410.1,Solyc08g076960.1,Solyc03g095780.3,Solyc09g091000.4,Solyc09g090990.2,Solyc12g095970.3,Solyc05g054380.2,Solyc09g090980.3,	0.3266
Solyc07g007260.4	690	1216	1203	32	137	129	28.9118	50.5282	42.3591	1.32144	5.62341	5.59064	7.6e-12	-5.74197	Molecular function	carbon-carbon lyase activity	GO:0016830	4	0.0225135	1.32804	41	111	5067	18218	Solyc04g071140.3,Solyc09g064430.4,Solyc05g005180.3,Solyc11g073160.3,Solyc09g009260.3,Solyc08g006750.4,Solyc11g010300.2,Solyc03g118640.3,Solyc11g007020.2,Solyc07g062810.4,Solyc10g079830.3,Solyc04g009650.4,Solyc02g077240.4,Solyc06g006080.3,Solyc05g008600.3,Solyc06g048730.3,Solyc10g076510.2,Solyc02g063150.3,Solyc02g085940.4,Solyc01g104880.3,Solyc03g034220.3,Solyc02g084440.4,Solyc10g054440.3,Solyc02g…	0.321621
Solyc06g083070.3	15702	12310	10466	370	1296	1977	168.978	131.38	94.694	4.01732	13.738	22.0729	7.65e-11	-5.73845	Molecular function	hydrolase activity, acting on acid anhydrides	GO:0016817	4	0.0238185	1.15023	151	472	5067	18218	Solyc03g080010.3,Solyc05g053600.3,Solyc10g047050.2,Solyc05g053590.4,Solyc12g070270.2,Solyc12g014080.2,Solyc10g008840.3,Solyc01g109110.3,Solyc07g053470.4,Solyc01g111920.3,Solyc10g086350.2,Solyc05g055330.3,Solyc09g008000.3,Solyc05g018510.3,Solyc11g067300.2,Solyc11g012460.3,Solyc06g005910.4,Solyc01g096220.3,Solyc11g069090.2,Solyc12g011130.2,Solyc08g076720.4,Solyc03g122070.3,Solyc09g073000.3,Solyc03g…	0.330157
Solyc02g072540.3	1080	958	994	68	124	141	15.4814	13.6125	11.9754	0.977239	1.74501	2.08418	1.12e-28	-5.7299	Molecular function	flavin adenine dinucleotide binding	GO:0050660	6	0.0243525	1.26631	56	159	5067	18218	Solyc11g071610.2,Solyc02g063180.4,Solyc02g070180.3,Solyc03g083440.4,Solyc10g008110.4,Solyc01g112140.4,Solyc08g078040.4,Solyc11g045370.1,Solyc10g076600.2,Solyc09g074430.4,Solyc01g087290.3,Solyc08g078390.4,Solyc08g068160.2,Solyc02g063190.2,Solyc11g071620.3,Solyc03g115560.3,Solyc03g121600.4,Solyc05g006810.4,Solyc09g009390.3,Solyc11g065920.2,Solyc04g077440.4,Solyc06g060880.4,Solyc07g061940.4,Solyc02g…	0.334251
Solyc01g105030.3	45054	55703	93614	2387	5614	10365	1044.77	1281.05	1825.12	55.8479	128.303	249.407	9.05e-12	-5.72902	Molecular function	nucleoside monophosphate kinase activity	GO:0050145	7	0.0249514	1.90346	9	17	5067	18218	Solyc06g065270.4,Solyc07g048010.4,Solyc03g078080.4,Solyc09g007180.3,Solyc11g072410.2,Solyc12g010380.3,Solyc06g075310.4,Solyc05g014980.4,Solyc03g063600.4,	0.339145
Solyc03g026280.3	455	53	216	11	10	31	13.9729	1.60593	5.56881	0.314294	0.284798	0.968643	2.84e-06	-5.70213	Molecular function	fructose-bisphosphate aldolase activity	GO:0004332	6	0.0256869	2.09733	7	12	5067	18218	Solyc09g009260.3,Solyc05g008600.3,Solyc02g084440.4,Solyc01g110360.3,Solyc02g062340.3,Solyc07g065900.3,Solyc10g083570.3,	0.345786
Solyc04g015750.3	32691	40663	64867	3771	6472	5133	194.05	239.375	323.718	22.5836	37.8635	31.6136	8.31e-31	-5.68493	Molecular function	arginine N-methyltransferase activity	GO:0016273	7	0.0256869	2.09733	7	12	5067	18218	Solyc08g005970.3,Solyc02g087640.3,Solyc05g054240.3,Solyc12g098360.2,Solyc01g096550.3,Solyc08g067050.3,Solyc12g008760.3,	0.345786
Solyc04g071340.5	2871	3611	5706	172	748	305	50.6007	63.1217	84.5641	3.05209	12.9819	5.57667	4.69e-12	-5.67523	Molecular function	protein-arginine N-methyltransferase activity	GO:0016274	8	0.0256869	2.09733	7	12	5067	18218	Solyc08g005970.3,Solyc02g087640.3,Solyc05g054240.3,Solyc12g098360.2,Solyc01g096550.3,Solyc08g067050.3,Solyc12g008760.3,	0.345786
Solyc11g007250.2	696	910	1092	49	111	132	14.2366	18.4599	18.7825	0.997048	2.22001	2.79982	1.11e-18	-5.64838	Molecular function	protein phosphatase regulator activity	GO:0019888	5	0.0263167	1.51807	19	45	5067	18218	Solyc06g061180.2,Solyc09g090970.4,Solyc12g096960.2,Solyc10g076410.1,Solyc08g076960.1,Solyc12g006920.2,Solyc06g065690.3,Solyc03g095780.3,Solyc05g014340.3,Solyc02g081140.3,Solyc10g083920.2,Solyc09g091000.4,Solyc02g067980.3,Solyc09g090990.2,Solyc02g093790.3,Solyc02g093800.3,Solyc02g093810.3,Solyc05g054380.2,Solyc09g090980.3,	0.344331
Solyc01g086920.3	5040	7591	12416	354	933	1238	97.1758	145.144	201.263	6.86918	17.7229	24.7527	1.43e-12	-5.63843	Molecular function	aldehyde-lyase activity	GO:0016832	5	0.0290492	1.79771	10	20	5067	18218	Solyc09g009260.3,Solyc03g118640.3,Solyc10g079830.3,Solyc05g008600.3,Solyc02g084440.4,Solyc01g110360.3,Solyc02g065240.3,Solyc02g062340.3,Solyc07g065900.3,Solyc10g083570.3,	0.376564
Solyc03g093540.1	2770	410	1402	115	155	166	111.171	16.3028	47.2832	4.62958	6.09572	6.88232	9.28e-09	-5.61414	Molecular function	vitamin B6 binding	GO:0070279	5	0.0318124	1.28408	45	126	5067	18218	Solyc04g071140.3,Solyc09g064430.4,Solyc07g055210.3,Solyc07g053720.3,Solyc08g068340.3,Solyc08g048450.4,Solyc07g066480.3,Solyc03g123600.4,Solyc08g006750.4,Solyc05g013380.3,Solyc10g006240.3,Solyc03g065340.3,Solyc08g083110.4,Solyc08g081535.1,Solyc07g062810.4,Solyc04g054310.3,Solyc08g048460.2,Solyc06g063090.4,Solyc08g079750.3,Solyc07g053710.3,Solyc08g066020.3,Solyc05g055000.4,Solyc07g043310.3,Solyc04g…	0.408599
Solyc06g069000.3	248	289	474	6	50	37	5.65524	6.53303	9.08826	0.120888	1.11959	0.869082	2.25e-08	-5.606	Molecular function	pyridoxal phosphate binding	GO:0030170	6	0.0318124	1.28408	45	126	5067	18218	Solyc04g071140.3,Solyc09g064430.4,Solyc07g055210.3,Solyc07g053720.3,Solyc08g068340.3,Solyc08g048450.4,Solyc07g066480.3,Solyc03g123600.4,Solyc08g006750.4,Solyc05g013380.3,Solyc10g006240.3,Solyc03g065340.3,Solyc08g083110.4,Solyc08g081535.1,Solyc07g062810.4,Solyc04g054310.3,Solyc08g048460.2,Solyc06g063090.4,Solyc08g079750.3,Solyc07g053710.3,Solyc08g066020.3,Solyc05g055000.4,Solyc07g043310.3,Solyc04g…	0.408599
Solyc02g085940.4	34497	39165	93148	2156	7503	7051	309.114	348.045	701.743	19.4859	66.2597	65.5623	4.48e-11	-5.59768	Molecular function	cellulase activity	GO:0008810	6	0.0323507	1.71955	11	23	5067	18218	Solyc01g110340.4,Solyc12g055970.3,Solyc05g005080.3,Solyc08g083210.3,Solyc09g075360.4,Solyc08g082250.3,Solyc11g008820.2,Solyc11g040340.3,Solyc07g049300.3,Solyc07g049290.3,Solyc04g081300.4,	0.408027
Solyc07g062543.1	644	943	1146	42	119	133	13.5592	19.7099	20.3083	0.878312	2.46849	2.90313	1.65e-14	-5.58339	Molecular function	starch binding	GO:2001070	5	0.033084	2.15725	6	10	5067	18218	Solyc09g098040.3,Solyc09g014400.3,Solyc02g091530.4,Solyc02g020980.4,Solyc02g080570.3,Solyc11g007830.2,	0.41355
Solyc08g013670.3	45324	53264	74367	2993	6442	9444	1616.65	1884.2	2230.14	107.699	226.475	349.567	8.18e-16	-5.57189	Molecular function	organic acid binding	GO:0043177	4	0.0337249	1.46752	20	49	5067	18218	Solyc06g054490.3,Solyc06g061180.2,Solyc09g090970.4,Solyc12g096960.2,Solyc10g076410.1,Solyc08g076960.1,Solyc03g025500.4,Solyc03g095780.3,Solyc11g006350.1,Solyc07g054420.2,Solyc03g025850.3,Solyc09g091000.4,Solyc02g092150.3,Solyc09g090990.2,Solyc12g095970.3,Solyc02g067530.4,Solyc06g059800.3,Solyc02g064750.4,Solyc05g054380.2,Solyc09g090980.3,	0.41783
Solyc08g075080.3	190	420	743	37	39	61	2.63533	5.77571	8.66604	0.508742	0.528847	0.869926	2.5e-11	-5.55745	Molecular function	MAP kinase activity	GO:0004707	8	0.03782	1.79771	9	18	5067	18218	Solyc07g056350.3,Solyc01g094960.3,Solyc11g072630.2,Solyc02g084870.3,Solyc01g080240.4,Solyc06g069010.3,Solyc10g007500.4,Solyc06g068990.4,Solyc08g081490.4,	0.464456
Solyc12g055970.3	752	843	1265	53	87	169	14.908	16.5899	21.1045	1.05583	1.69478	3.46978	9.26e-14	-5.5351	Molecular function	glycosyltransferase activity	GO:0016757	4	0.0380413	1.11602	194	625	5067	18218	Solyc03g114730.3,Solyc02g072470.4,Solyc09g008050.3,Solyc09g098590.4,Solyc12g038670.2,Solyc02g093750.3,Solyc10g017580.3,Solyc12g017690.3,Solyc03g031800.3,Solyc06g068770.3,Solyc06g008920.3,Solyc03g078730.3,Solyc06g064490.2,Solyc10g079350.3,Solyc02g065530.4,Solyc04g008310.3,Solyc07g043150.1,Solyc08g078650.3,Solyc08g082650.2,Solyc03g113520.3,Solyc02g081690.1,Solyc03g065340.3,Solyc11g011190.1,Solyc06g…	0.463111
Solyc02g069460.3	56718	61195	108553	3175	7708	12869	1635.81	1750.37	2632.19	92.371	219.108	385.152	8.78e-12	-5.53259	Molecular function	N-acyltransferase activity	GO:0016410	6	0.0382908	1.35412	29	77	5067	18218	Solyc08g068710.1,Solyc06g065570.3,Solyc02g068580.1,Solyc09g082230.1,Solyc03g043950.4,Solyc03g111710.3,Solyc05g010250.3,Solyc08g068780.3,Solyc03g121830.1,Solyc08g068730.1,Solyc09g082220.1,Solyc02g092260.3,Solyc04g051670.3,Solyc02g089780.3,Solyc12g099940.2,Solyc05g052170.4,Solyc03g097140.3,Solyc05g025890.3,Solyc09g009780.4,Solyc06g071830.2,Solyc03g097130.3,Solyc09g082240.4,Solyc03g031560.4,Solyc03g…	0.46213
Solyc12g019550.2	4531	7537	11567	228	530	1451	218.376	360.302	468.763	11.0636	25.1461	72.5489	2.87e-08	-5.52333	Molecular function	phosphotransferase activity, phosphate group as acceptor	GO:0016776	5	0.0386227	1.573	14	32	5067	18218	Solyc06g065270.4,Solyc07g048010.4,Solyc06g066310.3,Solyc08g008340.4,Solyc08g082430.4,Solyc03g078080.4,Solyc09g007180.3,Solyc11g072410.2,Solyc12g010380.3,Solyc06g075310.4,Solyc05g014980.4,Solyc02g087610.1,Solyc03g063600.4,Solyc06g075470.3,	0.462152
Solyc03g123620.4	2407	2295	4805	387	294	426	28.171	26.6439	47.2956	4.56575	3.38946	5.16576	2.29e-22	-5.4947	Molecular function	anion transmembrane transporter activity	GO:0008509	5	0.0391249	1.30743	36	99	5067	18218	Solyc10g044470.3,Solyc03g044010.4,Solyc03g082660.3,Solyc12g008770.2,Solyc10g084680.1,Solyc01g010760.3,Solyc06g084140.4,Solanum_lycopersicum_newGene_2453,Solyc05g054740.3,Solyc11g012360.2,Solyc06g061170.3,Solyc09g065560.3,Solyc07g007690.4,Solyc07g053830.3,Solyc06g082290.4,Solyc09g011360.4,Solyc08g066750.3,Solyc03g119930.1,Solyc12g056660.3,Solyc02g089110.3,Solyc05g007980.3,Solyc10g005690.3,Solyc08g…	0.464194
Solyc05g056050.3	22301	23596	43932	1426	2926	5362	596.974	626.422	988.714	38.5172	77.1971	148.94	9.7e-12	-5.46539	Molecular function	GTPase regulator activity	GO:0030695	5	0.0399878	1.31083	35	96	5067	18218	Solyc07g064740.3,Solyc07g008000.4,Solyc10g086660.2,Solyc05g014160.4,Solyc02g082730.3,Solyc03g118260.3,Solyc07g055260.3,Solyc12g042180.1,Solyc04g005560.3,Solyc08g016070.3,Solyc01g105200.2,Solyc12g042170.3,Solyc03g118710.3,Solyc10g084690.2,Solyc05g023750.3,Solyc07g064230.4,Solyc03g118720.3,Solyc08g005070.4,Solyc11g012780.3,Solyc09g010520.3,Solyc02g063355.1,Solyc12g044270.2,Solyc09g011480.3,Solyc10g…	0.470444
Solyc02g078620.1	301	164	214	9	24	39	9.70208	5.22247	5.78123	0.260316	0.759042	1.28819	1.54e-09	-5.44982	Molecular function	serine-type carboxypeptidase activity	GO:0004185	7	0.0404875	1.38285	25	65	5067	18218	Solyc04g064750.2,Solyc04g077640.4,Solyc05g050770.4,Solyc10g049270.2,Solyc11g066520.3,Solyc01g010710.4,Solyc01g087970.3,Solyc04g077620.1,Solyc05g041540.4,Solyc10g049210.3,Solyc07g005960.3,Solyc04g077670.3,Solyc12g088250.2,Solyc04g079040.4,Solyc04g015340.3,Solyc05g041530.3,Solyc01g108480.1,Solyc01g108490.3,Solyc03g118370.3,Solyc04g077650.3,Solyc12g099160.2,Solyc02g088820.4,Solyc06g083040.3,Solyc07g…	0.472355
Solyc05g009270.4	1390	3498	5005	155	319	549	21.8213	54.4686	66.0663	2.45448	4.93588	8.93099	1.05e-09	-5.44839	Molecular function	GTPase activator activity	GO:0005096	6	0.041301	1.4016	23	59	5067	18218	Solyc07g064740.3,Solyc07g008000.4,Solyc05g014160.4,Solyc02g082730.3,Solyc03g118260.3,Solyc12g042180.1,Solyc01g105200.2,Solyc12g042170.3,Solyc03g118710.3,Solyc10g084690.2,Solyc05g023750.3,Solyc07g064230.4,Solyc03g118720.3,Solyc08g005070.4,Solyc11g012780.3,Solyc09g010520.3,Solyc02g063355.1,Solyc10g076990.3,Solyc03g006610.3,Solyc11g064880.2,Solyc09g092070.4,Solyc01g008770.3,Solyc04g009560.3,	0.477863
Solyc03g093110.3	63	35	354	6	15	12	1.01458	0.556442	4.84114	0.084868	0.231423	0.199709	2.02e-05	-5.4386	Molecular function	racemase and epimerase activity, acting on carbohydrates and derivatives	GO:0016857	5	0.0450695	1.6479	11	24	5067	18218	Solyc08g081930.3,Solyc02g087770.3,Solyc03g113030.4,Solyc01g097340.3,Solyc03g115820.3,Solyc07g043550.3,Solyc02g069580.3,Solyc01g095470.3,Solyc02g085100.3,Solyc09g082990.3,Solyc02g087800.3,	0.517191
Solyc09g011750.3	447	338	498	33	70	57	6.39188	4.79845	5.98999	0.471303	0.980943	0.843114	3.54e-22	-5.39838	Molecular function	guanyl nucleotide binding	GO:0019001	7	0.0464339	1.16541	94	290	5067	18218	Solyc07g014650.3,Solyc10g047050.2,Solyc12g014080.2,Solyc10g008840.3,Solyc09g061430.3,Solyc01g109110.3,Solyc07g053470.4,Solyc10g086350.2,Solyc02g064640.4,Solyc11g012460.3,Solyc06g005910.4,Solyc01g096220.3,Solyc12g011130.2,Solyc09g073000.3,Solyc03g119290.3,Solyc04g077020.3,Solyc08g081330.4,Solyc01g005330.3,Solyc03g043960.3,Solyc08g005310.4,Solyc01g091580.3,Solyc12g035420.3,Solyc05g005190.3,Solyc06g…	0.528516
Solyc03g093550.1	3863	669	2634	145	178	399	146.677	25.1735	84.0869	5.53691	6.64246	15.7118	1.32e-07	-5.3862	Molecular function	GTP binding	GO:0005525	9	0.0464339	1.16541	94	290	5067	18218	Solyc07g014650.3,Solyc10g047050.2,Solyc12g014080.2,Solyc10g008840.3,Solyc09g061430.3,Solyc01g109110.3,Solyc07g053470.4,Solyc10g086350.2,Solyc02g064640.4,Solyc11g012460.3,Solyc06g005910.4,Solyc01g096220.3,Solyc12g011130.2,Solyc09g073000.3,Solyc03g119290.3,Solyc04g077020.3,Solyc08g081330.4,Solyc01g005330.3,Solyc03g043960.3,Solyc08g005310.4,Solyc01g091580.3,Solyc12g035420.3,Solyc05g005190.3,Solyc06g…	0.528516
Solyc07g040960.1	6010	460	2899	173	152	304	110.458	8.3704	44.7903	3.19239	2.74884	5.78269	9e-05	-5.38531	Molecular function	guanyl ribonucleotide binding	GO:0032561	8	0.0464339	1.16541	94	290	5067	18218	Solyc07g014650.3,Solyc10g047050.2,Solyc12g014080.2,Solyc10g008840.3,Solyc09g061430.3,Solyc01g109110.3,Solyc07g053470.4,Solyc10g086350.2,Solyc02g064640.4,Solyc11g012460.3,Solyc06g005910.4,Solyc01g096220.3,Solyc12g011130.2,Solyc09g073000.3,Solyc03g119290.3,Solyc04g077020.3,Solyc08g081330.4,Solyc01g005330.3,Solyc03g043960.3,Solyc08g005310.4,Solyc01g091580.3,Solyc12g035420.3,Solyc05g005190.3,Solyc06g…	0.528516
Solyc10g008710.3	267	612	472	41	75	48	6.29504	14.3056	9.35211	0.965803	1.73469	1.17342	3.28e-16	-5.38067	Molecular function	N-acetyltransferase activity	GO:0008080	7	0.0468698	1.34828	27	72	5067	18218	Solyc08g068710.1,Solyc06g065570.3,Solyc02g068580.1,Solyc09g082230.1,Solyc03g043950.4,Solyc03g111710.3,Solyc05g010250.3,Solyc08g068780.3,Solyc08g068730.1,Solyc09g082220.1,Solyc02g092260.3,Solyc04g051670.3,Solyc02g089780.3,Solyc12g099940.2,Solyc05g052170.4,Solyc03g097140.3,Solyc05g025890.3,Solyc09g009780.4,Solyc06g071830.2,Solyc03g097130.3,Solyc09g082240.4,Solyc03g025710.3,Solyc12g010680.3,Solyc08g…	0.520776
Solyc02g063030.4	4774	4566	4500	188	858	583	93.4784	88.6607	74.077	3.70858	16.5533	11.8298	6.78e-12	-5.3764	Molecular function	chitinase activity	GO:0004568	6	0.0474228	1.59797	12	27	5067	18218	Solyc10g055810.2,Solyc01g095670.4,Solyc10g055820.3,Solyc02g061770.4,Solyc04g072000.4,Solyc09g098540.3,Solyc09g042770.4,Solyc10g055780.1,Solyc12g098810.2,Solyc02g082930.3,Solyc02g082920.4,Solyc10g055800.2,	0.522771
Solyc10g083170.2	141	525	678	26	42	69	4.24424	15.6774	17.1747	0.772339	1.23733	2.14418	2.76e-08	-5.3761	Molecular function	acyltransferase activity	GO:0016746	4	0.0491571	1.1414	120	378	5067	18218	Solyc08g082340.3,Solyc02g077460.3,Solyc04g078660.2,Solyc08g068710.1,Solyc10g079110.2,Solyc07g065340.1,Solyc07g053350.4,Solyc05g009270.4,Solyc10g008660.2,Solyc03g005320.3,Solyc03g025320.4,Solyc08g078030.4,Solyc07g064800.3,Solyc08g067260.4,Solyc06g065570.3,Solyc08g076470.4,Solyc12g010590.3,Solyc04g009380.3,Solyc10g086565.2,Solyc11g072980.1,Solyc01g011430.4,Solyc01g091950.4,Solyc05g015800.3,Solyc02g…	0.537656
Solyc12g044270.2	89	123	204	19	2	17	1.55348	2.1252	2.9924	0.329576	0.034445	0.303292	1.22e-06	-5.3663	Molecular function	DNA N-glycosylase activity	GO:0019104	6	0.0494621	1.79771	8	16	5067	18218	Solyc02g082120.3,Solyc12g010050.2,Solyc09g083003.1,Solyc03g117510.4,Solyc10g005210.4,Solyc03g116880.3,Solyc02g021060.4,Solyc09g083007.1,	0.536798
Solyc12g099650.2	11801	20244	34179	1198	2466	3800	951.365	1618.56	2316.63	97.4063	195.922	317.863	2.47e-11	-5.36286	Cellular component	photosystem I	GO:0009522	5	3.68594e-14	2.71946	46	64	3586	13568	Solyc08g006930.3,Solyc12g044280.2,Solyc06g069730.3,Solyc05g056050.3,Solyc02g070980.1,Solyc07g063600.3,Solyc00g500208.1,Solyc10g007690.3,Solyc03g120640.3,Solyc08g067320.3,Solyc02g071030.2,Solyc12g009200.2,Solyc06g082950.4,Solyc09g014520.3,Solyc06g074200.4,Solyc08g013670.3,Solyc08g067330.1,Solyc06g083680.3,Solyc06g054260.1,Solyc02g070970.1,Solyc07g066150.1,Solyc12g006140.2,Solyc01g105030.3,Solyc02g…	2.29634e-11
Solyc10g006900.3	12850	17759	38351	942	2104	4217	238.906	327.442	599.47	17.6693	38.5474	81.3596	6.17e-09	-5.36217	Cellular component	photosystem II	GO:0009523	5	2.34295e-11	2.27876	53	88	3586	13568	Solyc10g054420.2,Solyc00g500206.1,Solyc01g087040.2,Solyc06g069730.3,Solyc01g106090.3,Solyc05g056050.3,Solyc02g070980.1,Solyc09g064500.3,Solyc07g063600.3,Solyc10g007690.3,Solyc08g067320.3,Solyc02g071030.2,Solyc12g150101.1,Solyc07g044860.3,Solyc12g009200.2,Solyc09g014520.3,Solyc02g090030.2,Solyc02g065400.3,Solyc08g067330.1,Solyc03g114930.3,Solyc10g077120.3,Solyc02g079950.3,Solyc02g070970.1,Solyc12g…	7.29828e-09
Solyc09g075590.1	70	186	409	10	22	31	4.08803	10.766	20.1297	0.590336	1.22786	1.85203	6.02e-07	-5.35706	Cellular component	ribosome	GO:0005840	6	3.11047e-11	1.49295	204	517	3586	13568	Solyc09g065330.3,Solyc06g083180.4,Solyc03g025630.3,Solyc03g078290.3,Solyc06g082650.4,Solyc08g075090.4,Solyc08g065760.3,Solyc12g096300.2,Solyc06g065390.4,Solyc03g114050.3,Solyc06g066660.4,Solyc07g009330.4,Solyc12g008720.2,Solyc11g068820.3,Solyc10g061970.2,Solyc11g042610.2,Solyc07g063960.3,Solyc03g119040.3,Solyc09g090610.3,Solyc05g054070.4,Solyc12g014390.3,Solyc07g062870.3,Solyc06g068400.3,Solyc05g…	6.4594e-09
Solyc02g080230.3	281	421	687	13	56	76	6.66947	9.91221	13.7388	0.289176	1.31061	1.85501	3.12e-08	-5.35066	Cellular component	photosystem	GO:0009521	4	4.89829e-10	1.94827	69	134	3586	13568	Solyc10g054420.2,Solyc00g500206.1,Solyc08g006930.3,Solyc12g044280.2,Solyc01g087040.2,Solyc06g069730.3,Solyc01g106090.3,Solyc05g056050.3,Solyc02g070980.1,Solyc09g064500.3,Solyc07g063600.3,Solyc00g500208.1,Solyc10g007690.3,Solyc03g120640.3,Solyc08g067320.3,Solyc02g071030.2,Solyc12g150101.1,Solyc07g044860.3,Solyc12g009200.2,Solyc06g082950.4,Solyc09g014520.3,Solyc06g074200.4,Solyc02g090030.2,Solyc02g…	7.62909e-08
Solyc07g065900.3	6302	4917	7940	165	1203	760	125.187	96.8578	132.601	3.28844	23.5486	15.6639	1.58e-08	-5.31525	Cellular component	preribosome	GO:0030684	4	1.55606e-09	2.89334	26	34	3586	13568	Solyc07g047670.3,Solyc11g072320.3,Solyc03g120080.4,Solyc03g112820.4,Solyc07g053660.3,Solyc03g097160.4,Solyc08g008040.3,Solyc01g103720.4,Solyc02g088780.4,Solyc11g072390.2,Solyc02g081680.4,Solyc07g017940.1,Solyc09g011420.3,Solyc01g087670.3,Solyc01g006090.3,Solyc01g096800.3,Solyc08g006470.4,Solyc05g011990.4,Solyc01g006170.4,Solyc10g079430.2,Solyc03g121130.3,Solyc10g080180.3,Solyc03g093480.3,Solyc09g…	1.93885e-07
Solyc09g091430.4	4947	5873	9133	699	693	1145	67.692	79.6882	105.063	9.64003	9.3383	16.2474	5.97e-23	-5.31025	Cellular component	photosynthetic membrane	GO:0034357	4	1.82273e-09	1.66109	108	246	3586	13568	Solyc08g080050.4,Solyc10g054420.2,Solyc10g051110.1,Solyc00g500206.1,Solyc08g006930.3,Solyc12g044280.2,Solyc01g087040.2,Solyc06g069730.3,Solyc01g106090.3,Solyc05g056050.3,Solyc01g095670.4,Solyc12g009980.2,Solyc02g070980.1,Solyc09g064500.3,Solyc07g063600.3,Solyc00g500208.1,Solyc10g007690.3,Solyc03g120640.3,Solyc08g067320.3,Solyc02g071030.2,Solyc12g150101.1,Solyc04g071930.4,Solyc01g006330.4,Solyc07g…	1.8926e-07
Solyc06g049050.3	7987	10608	10486	531	974	1961	184.426	242.934	203.581	12.3521	22.1525	46.9809	2.49e-12	-5.30901	Cellular component	plastid thylakoid	GO:0031976	5	2.20841e-09	1.82173	78	162	3586	13568	Solyc08g080050.4,Solyc10g051110.1,Solyc06g069730.3,Solyc05g056050.3,Solyc01g095670.4,Solyc12g009980.2,Solyc02g070980.1,Solyc07g063600.3,Solyc00g500208.1,Solyc10g007690.3,Solyc08g067320.3,Solyc02g071030.2,Solyc04g071930.4,Solyc01g006330.4,Solyc12g009200.2,Solyc09g014520.3,Solyc11g044530.2,Solyc09g082690.3,Solyc08g067330.1,Solyc05g014310.3,Solyc08g077880.3,Solyc02g070970.1,Solyc12g056620.2,Solyc06g…	1.96548e-07
Solyc08g076820.3	863	2052	3333	50	244	332	16.8912	39.8406	54.8705	0.974959	4.69494	6.73353	3.97e-07	-5.30866	Cellular component	chloroplast thylakoid	GO:0009534	6	2.20841e-09	1.82173	78	162	3586	13568	Solyc08g080050.4,Solyc10g051110.1,Solyc06g069730.3,Solyc05g056050.3,Solyc01g095670.4,Solyc12g009980.2,Solyc02g070980.1,Solyc07g063600.3,Solyc00g500208.1,Solyc10g007690.3,Solyc08g067320.3,Solyc02g071030.2,Solyc04g071930.4,Solyc01g006330.4,Solyc12g009200.2,Solyc09g014520.3,Solyc11g044530.2,Solyc09g082690.3,Solyc08g067330.1,Solyc05g014310.3,Solyc08g077880.3,Solyc02g070970.1,Solyc12g056620.2,Solyc06g…	1.96548e-07
Solyc01g067510.3	355	666	1643	45	119	122	4.86868	9.05337	18.9485	0.614097	1.60352	1.7291	1.7e-08	-5.30404	Cellular component	thylakoid membrane	GO:0042651	5	1.16868e-08	1.70747	88	195	3586	13568	Solyc08g080050.4,Solyc10g054420.2,Solyc10g051110.1,Solyc01g087040.2,Solyc06g069730.3,Solyc01g106090.3,Solyc05g056050.3,Solyc01g095670.4,Solyc12g009980.2,Solyc02g070980.1,Solyc09g064500.3,Solyc07g063600.3,Solyc00g500208.1,Solyc10g007690.3,Solyc08g067320.3,Solyc02g071030.2,Solyc04g071930.4,Solyc01g006330.4,Solyc07g044860.3,Solyc12g009200.2,Solyc09g014520.3,Solyc11g044530.2,Solyc09g082690.3,Solyc02g…	8.08987e-07
Solyc07g022900.4	8163	7394	8841	315	1060	1496	174.872	157.078	159.236	6.79253	22.3833	33.2448	9.89e-11	-5.30049	Cellular component	thylakoid	GO:0009579	4	2.07831e-08	1.54012	127	312	3586	13568	Solyc08g080050.4,Solyc10g054420.2,Solyc10g051110.1,Solyc00g500206.1,Solyc08g006930.3,Solyc12g044280.2,Solyc01g087040.2,Solyc11g010480.2,Solyc01g109040.4,Solyc06g069730.3,Solyc01g106090.3,Solyc05g056050.3,Solyc01g095670.4,Solyc12g009980.2,Solyc02g070980.1,Solyc09g064500.3,Solyc01g095430.3,Solyc07g063600.3,Solyc00g500208.1,Solyc10g007690.3,Solyc03g120640.3,Solyc08g067320.3,Solyc11g011990.2,Solyc02g…	1.29478e-06
Solyc11g006230.3	1513	1130	1134	55	225	180	44.2721	32.7878	27.8918	1.61473	6.47011	5.44857	2.5e-11	-5.29142	Cellular component	chloroplast thylakoid membrane	GO:0009535	7	3.62105e-08	1.78954	70	148	3586	13568	Solyc08g080050.4,Solyc10g051110.1,Solyc06g069730.3,Solyc05g056050.3,Solyc01g095670.4,Solyc12g009980.2,Solyc02g070980.1,Solyc07g063600.3,Solyc00g500208.1,Solyc10g007690.3,Solyc08g067320.3,Solyc02g071030.2,Solyc04g071930.4,Solyc01g006330.4,Solyc12g009200.2,Solyc09g014520.3,Solyc11g044530.2,Solyc09g082690.3,Solyc08g067330.1,Solyc08g077880.3,Solyc02g070970.1,Solyc12g056620.2,Solyc12g006140.2,Solyc03g…	2.05083e-06
Solyc01g091530.4	1766	3425	6661	287	519	587	29.8124	57.3413	94.5432	4.88357	8.62911	10.2698	1.22e-11	-5.28829	Cellular component	plastid thylakoid membrane	GO:0055035	6	5.08039e-08	1.77753	70	149	3586	13568	Solyc08g080050.4,Solyc10g051110.1,Solyc06g069730.3,Solyc05g056050.3,Solyc01g095670.4,Solyc12g009980.2,Solyc02g070980.1,Solyc07g063600.3,Solyc00g500208.1,Solyc10g007690.3,Solyc08g067320.3,Solyc02g071030.2,Solyc04g071930.4,Solyc01g006330.4,Solyc12g009200.2,Solyc09g014520.3,Solyc11g044530.2,Solyc09g082690.3,Solyc08g067330.1,Solyc08g077880.3,Solyc02g070970.1,Solyc12g056620.2,Solyc12g006140.2,Solyc03g…	2.63757e-06
Solyc09g014520.3	95549	111091	204987	6497	14944	26204	1898.05	2188.57	3423.5	130.222	292.595	540.177	1.85e-10	-5.2815	Cellular component	non-membrane-bounded organelle	GO:0043228	4	7.84705e-08	1.24755	396	1201	3586	13568	Solyc09g065330.3,Solyc06g083180.4,Solyc03g025630.3,Solyc07g047670.3,Solyc03g078290.3,Solyc03g120340.3,Solyc06g082650.4,Solyc08g075090.4,Solyc02g021360.3,Solyc08g065760.3,Solyc12g096300.2,Solyc06g065390.4,Solyc03g114050.3,Solyc06g066660.4,Solyc12g008590.3,Solyc09g009140.3,Solyc07g009330.4,Solyc12g008720.2,Solyc11g068820.3,Solyc10g061970.2,Solyc11g068690.2,Solyc10g078950.2,Solyc11g072320.3,Solyc07g…	3.76055e-06
Solyc01g110570.3	383	457	430	43	42	80	22.8836	27.0762	21.6031	2.57331	2.45038	4.90566	3.6e-20	-5.26481	Cellular component	intracellular non-membrane-bounded organelle	GO:0043232	5	7.84705e-08	1.24755	396	1201	3586	13568	Solyc09g065330.3,Solyc06g083180.4,Solyc03g025630.3,Solyc07g047670.3,Solyc03g078290.3,Solyc03g120340.3,Solyc06g082650.4,Solyc08g075090.4,Solyc02g021360.3,Solyc08g065760.3,Solyc12g096300.2,Solyc06g065390.4,Solyc03g114050.3,Solyc06g066660.4,Solyc12g008590.3,Solyc09g009140.3,Solyc07g009330.4,Solyc12g008720.2,Solyc11g068820.3,Solyc10g061970.2,Solyc11g068690.2,Solyc10g078950.2,Solyc11g072320.3,Solyc07g…	3.76055e-06
Solyc10g005210.4	635	663	981	58	117	122	11.7037	12.1265	15.201	1.07526	2.10955	2.32602	1.82e-20	-5.26429	Cellular component	plastid envelope	GO:0009526	5	8.48175e-08	1.58419	103	246	3586	13568	Solyc08g080050.4,Solyc10g051110.1,Solyc10g017580.3,Solyc06g069730.3,Solyc05g056050.3,Solyc01g095670.4,Solyc12g009980.2,Solyc02g070980.1,Solyc12g019740.2,Solyc07g063600.3,Solyc00g500208.1,Solyc10g007690.3,Solyc04g081210.4,Solyc08g067320.3,Solyc02g071030.2,Solyc08g079660.3,Solyc04g071930.4,Solyc01g006330.4,Solyc12g009200.2,Solyc04g051190.3,Solyc01g088490.3,Solyc09g014520.3,Solyc11g044530.2,Solyc01g…	3.52275e-06
Solyc06g082950.4	34152	38390	60187	1927	5263	8543	1000.68	1115.58	1482.66	56.969	151.994	259.749	1.75e-10	-5.24882	Cellular component	photosystem II oxygen evolving complex	GO:0009654	5	8.92279e-08	3.09568	18	22	3586	13568	Solyc10g054420.2,Solyc01g087040.2,Solyc01g106090.3,Solyc09g064500.3,Solyc07g044860.3,Solyc02g090030.2,Solyc02g065400.3,Solyc03g114930.3,Solyc02g079950.3,Solyc04g064670.3,Solyc08g067840.3,Solyc04g009420.3,Solyc11g008480.2,Solyc05g007780.3,Solyc10g006530.4,Solyc07g066310.3,Solyc06g065490.3,Solyc12g094720.3,	3.47431e-06
Solyc02g080200.4	272	3403	7248	10	31	191	3.97429	49.3313	89.0795	0.142762	0.434411	2.89287	0.0011645	-5.21861	Cellular component	obsolete chloroplast part	GO:0044434	0	5.29237e-07	1.76183	61	131	3586	13568	Solyc10g051110.1,Solyc10g017580.3,Solyc01g095670.4,Solyc12g009980.2,Solyc12g019740.2,Solyc04g081210.4,Solyc08g079660.3,Solyc04g071930.4,Solyc02g066920.3,Solyc11g005340.3,Solyc11g065740.2,Solyc02g091530.4,Solyc11g044530.2,Solyc01g104170.3,Solyc02g094420.3,Solyc03g019880.3,Solyc08g068590.4,Solyc05g014310.3,Solyc06g071580.3,Solyc08g077880.3,Solyc12g056620.2,Solyc03g096545.1,Solyc08g006160.4,Solyc10g…	1.9395e-05
Solyc02g071030.2	4797	6651	28658	0	11	51	165.712	227.875	832.467	0	0.346878	1.81388	0.00148405	-5.19952	Cellular component	obsolete plastid part	GO:0044435	0	7.78254e-07	1.73765	62	135	3586	13568	Solyc10g051110.1,Solyc10g017580.3,Solyc01g095670.4,Solyc12g009980.2,Solyc12g019740.2,Solyc04g081210.4,Solyc08g079660.3,Solyc04g071930.4,Solyc02g066920.3,Solyc11g005340.3,Solyc11g065740.2,Solyc01g088490.3,Solyc02g091530.4,Solyc11g044530.2,Solyc01g104170.3,Solyc02g094420.3,Solyc03g019880.3,Solyc08g068590.4,Solyc05g014310.3,Solyc06g071580.3,Solyc08g077880.3,Solyc12g056620.2,Solyc03g096545.1,Solyc08g…	2.69362e-05
Solyc01g099630.4	2036	2164	3186	132	371	440	42.7348	45.0523	56.2437	2.79053	7.66349	9.5826	7.55e-13	-5.19119	Cellular component	small-subunit processome	GO:0032040	5	2.7178e-06	2.88275	16	21	3586	13568	Solyc11g072320.3,Solyc03g120080.4,Solyc07g053660.3,Solyc03g097160.4,Solyc08g008040.3,Solyc11g072390.2,Solyc09g011420.3,Solyc01g087670.3,Solyc05g011990.4,Solyc10g079430.2,Solyc03g121130.3,Solyc10g080180.3,Solyc03g093480.3,Solyc09g005760.3,Solyc10g039190.2,Solyc05g008190.3,	8.91152e-05
Solyc08g076290.3	10613	15667	29050	1267	3141	2706	149.067	218.232	343.051	17.9498	43.4757	39.4415	7.23e-13	-5.16263	Cellular component	obsolete thylakoid part	GO:0044436	0	3.82418e-06	2.22081	27	46	3586	13568	Solyc10g051110.1,Solyc01g095670.4,Solyc12g009980.2,Solyc04g071930.4,Solyc11g044530.2,Solyc08g077880.3,Solyc12g056620.2,Solyc03g096545.1,Solyc10g006370.3,Solyc10g081100.3,Solyc08g007180.3,Solyc09g042770.4,Solyc10g077090.2,Solyc06g068670.3,Solyc06g053140.3,Solyc02g081170.4,Solyc12g019290.1,Solyc03g120230.3,Solyc09g091830.4,Solyc08g079110.4,Solyc06g005710.3,Solyc02g091640.3,Solyc02g014150.4,Solyc03g…	0.000119123
Solyc06g066640.3	14176	16296	25454	966	2476	3639	512.943	584.778	774.325	35.2446	88.2883	136.622	2.45e-11	-5.15175	Cellular component	nucleolus	GO:0005730	6	4.22611e-06	1.74375	53	115	3586	13568	Solyc07g047670.3,Solyc11g072320.3,Solyc02g082360.4,Solyc02g068420.4,Solyc03g119040.3,Solyc12g038980.2,Solyc04g007850.3,Solyc01g104470.3,Solyc03g120080.4,Solyc03g112820.4,Solyc04g016380.3,Solyc06g082090.4,Solyc07g053660.3,Solyc01g111420.3,Solyc04g074090.4,Solyc08g008160.4,Solyc01g103720.4,Solyc02g088780.4,Solyc11g072390.2,Solyc02g081680.4,Solyc10g007650.3,Solyc04g054510.4,Solyc12g005230.3,Solyc11g…	0.000125374
Solyc06g075580.4	1914	1886	2769	129	301	429	14.2739	13.9511	17.3658	0.964911	2.20965	3.31961	5.74e-13	-5.14034	Cellular component	plastid membrane	GO:0042170	5	5.71235e-06	1.53538	84	207	3586	13568	Solyc08g080050.4,Solyc10g051110.1,Solyc10g017580.3,Solyc06g069730.3,Solyc05g056050.3,Solyc01g095670.4,Solyc12g009980.2,Solyc02g070980.1,Solyc12g019740.2,Solyc07g063600.3,Solyc00g500208.1,Solyc10g007690.3,Solyc08g067320.3,Solyc02g071030.2,Solyc04g071930.4,Solyc01g006330.4,Solyc12g009200.2,Solyc01g088490.3,Solyc09g014520.3,Solyc11g044530.2,Solyc01g104170.3,Solyc09g082690.3,Solyc08g067330.1,Solyc08g…	0.000161763
Solyc05g055650.3	117	240	208	16	27	31	2.32211	4.72125	3.46888	0.307789	0.517448	0.630482	8.3e-13	-5.13519	Cellular component	photosystem I reaction center	GO:0009538	4	1.37805e-05	3.43964	10	11	3586	13568	Solyc12g044280.2,Solyc03g120640.3,Solyc06g082950.4,Solyc06g083680.3,Solyc06g054260.1,Solyc09g063130.3,Solyc02g069460.3,Solyc06g066640.3,Solyc02g069450.3,Solyc06g082940.3,	0.000373271
Solyc07g062710.4	1104	1248	1552	28	60	304	28.9718	32.4913	34.248	0.718055	1.52897	8.28097	8.35e-06	-5.1254	Cellular component	organelle subcompartment	GO:0031984	3	1.72046e-05	1.37028	134	370	3586	13568	Solyc08g080050.4,Solyc01g090990.3,Solyc10g051110.1,Solyc02g080130.4,Solyc06g069730.3,Solyc05g056050.3,Solyc01g095670.4,Solyc12g009980.2,Solyc02g070980.1,Solyc06g035810.1,Solyc07g063600.3,Solyc00g500208.1,Solyc10g007690.3,Solyc08g067320.3,Solyc02g071030.2,Solyc02g082840.3,Solyc10g005780.3,Solyc01g107620.4,Solyc01g109420.3,Solyc04g071930.4,Solyc11g005710.2,Solyc10g079000.1,Solyc01g006330.4,Solyc02g…	0.000446604
Solyc09g063130.3	58648	58524	90642	3477	9885	13482	1202.27	1189.83	1562.21	71.9213	199.716	286.8	2.82e-11	-5.11865	Cellular component	preribosome, large subunit precursor	GO:0030687	5	0.000163087	3.3632	8	9	3586	13568	Solyc07g047670.3,Solyc01g103720.4,Solyc02g088780.4,Solyc02g081680.4,Solyc01g006090.3,Solyc01g096800.3,Solyc08g006470.4,Solyc01g006170.4,	0.00406414
Solyc01g108610.3	301	315	642	18	65	71	8.14677	8.45649	14.6235	0.473991	1.71234	1.97238	5.94e-09	-5.11756	Cellular component	obsolete cell part	GO:0044464	0	0.000172838	1.13381	537	1792	3586	13568	Solyc01g091530.4,Solyc01g090510.2,Solyc05g012920.3,Solyc03g025630.3,Solyc10g051110.1,Solyc10g086170.1,Solyc04g078780.3,Solyc08g029150.3,Solyc11g007570.2,Solyc02g068540.2,Solyc09g007390.3,Solyc07g008000.4,Solyc10g017580.3,Solyc07g062820.1,Solyc02g080130.4,Solyc02g083835.1,Solyc09g061790.1,Solyc12g056390.1,Solyc10g008590.1,Solyc06g076120.2,Solyc02g091710.3,Solyc01g112020.3,Solyc11g062250.2,Solyc04g…	0.00414146
Solyc05g025590.4	15637	19087	30308	1506	3005	4171	121.621	147.23	198.185	11.8183	23.0337	33.6613	5.08e-14	-5.10615	Cellular component	organelle envelope	GO:0031967	4	0.000193297	1.27423	163	484	3586	13568	Solyc08g080050.4,Solyc03g044010.4,Solyc10g051110.1,Solyc09g007390.3,Solyc10g017580.3,Solyc12g008770.2,Solyc06g069730.3,Solyc05g056050.3,Solyc03g095730.4,Solyc02g094470.3,Solyc01g095670.4,Solyc12g009980.2,Solyc02g070980.1,Solyc12g019740.2,Solyc07g063600.3,Solyc01g022750.3,Solyc00g500208.1,Solyc10g007690.3,Solyc01g010760.3,Solyc11g071790.2,Solyc04g081210.4,Solyc08g067320.3,Solyc02g071030.2,Solyc08g…	0.00446016
Solyc07g042390.3	217	466	732	12	68	77	10.571	22.5452	30.0851	0.579773	3.25511	3.89958	1.32e-06	-5.09413	Cellular component	envelope	GO:0031975	3	0.000193297	1.27423	163	484	3586	13568	Solyc08g080050.4,Solyc03g044010.4,Solyc10g051110.1,Solyc09g007390.3,Solyc10g017580.3,Solyc12g008770.2,Solyc06g069730.3,Solyc05g056050.3,Solyc03g095730.4,Solyc02g094470.3,Solyc01g095670.4,Solyc12g009980.2,Solyc02g070980.1,Solyc12g019740.2,Solyc07g063600.3,Solyc01g022750.3,Solyc00g500208.1,Solyc10g007690.3,Solyc01g010760.3,Solyc11g071790.2,Solyc04g081210.4,Solyc08g067320.3,Solyc02g071030.2,Solyc08g…	0.00446016
Solyc02g067930.3	144	391	539	37	29	64	2.31963	6.24422	7.31099	0.587464	0.447604	1.07129	9.82e-09	-5.08997	Cellular component	obsolete cell	GO:0005623	0	0.000311026	1.12752	537	1802	3586	13568	Solyc01g091530.4,Solyc01g090510.2,Solyc05g012920.3,Solyc03g025630.3,Solyc10g051110.1,Solyc10g086170.1,Solyc04g078780.3,Solyc08g029150.3,Solyc11g007570.2,Solyc02g068540.2,Solyc09g007390.3,Solyc07g008000.4,Solyc10g017580.3,Solyc07g062820.1,Solyc02g080130.4,Solyc02g083835.1,Solyc09g061790.1,Solyc12g056390.1,Solyc10g008590.1,Solyc06g076120.2,Solyc02g091710.3,Solyc01g112020.3,Solyc11g062250.2,Solyc04g…	0.0066817
Solyc03g120640.3	36185	41680	65304	2923	6460	9644	1289.01	1472.51	1955.81	105.048	226.796	356.498	3.05e-12	-5.07728	Cellular component	chloroplast envelope	GO:0009941	6	0.000507201	1.54634	47	115	3586	13568	Solyc10g051110.1,Solyc10g017580.3,Solyc01g095670.4,Solyc12g009980.2,Solyc12g019740.2,Solyc04g081210.4,Solyc08g079660.3,Solyc01g006330.4,Solyc04g051190.3,Solyc01g104170.3,Solyc08g067330.1,Solyc05g014310.3,Solyc05g005020.4,Solyc07g055340.3,Solyc06g071580.3,Solyc10g083790.3,Solyc08g006160.4,Solyc10g006370.3,Solyc10g076700.2,Solyc12g015680.1,Solyc10g081100.3,Solyc10g079260.2,Solyc10g077090.2,Solyc03g…	0.0105329
Solyc06g060310.3	2932	3496	5327	337	568	739	39.9121	47.2019	60.9782	4.62474	7.60958	10.4373	5.18e-18	-5.06792	Cellular component	intrinsic component of plasma membrane	GO:0031226	4	0.000852039	1.71445	29	64	3586	13568	Solyc01g091530.4,Solyc06g076120.2,Solyc02g080500.3,Solyc03g078000.3,Solyc09g075820.3,Solyc05g054740.3,Solyc07g053540.1,Solyc04g005420.4,Solyc11g072030.3,Solyc02g079220.4,Solyc02g083540.3,Solyc10g005100.3,Solyc03g096950.4,Solyc02g065765.1,Solyc07g049370.2,Solyc11g017010.2,Solyc03g032040.3,Solyc12g015690.3,Solyc05g012380.3,Solyc04g054730.3,Solyc07g048090.2,Solyc11g012450.2,Solyc01g107290.3,Solyc07g…	0.0171232
Solyc08g076150.4	1141	1443	2135	91	161	351	16.991	21.316	26.7287	1.35417	2.36099	5.41681	7.31e-10	-5.06451	Cellular component	microtubule cytoskeleton	GO:0015630	7	0.000919854	1.43681	60	158	3586	13568	Solyc02g021360.3,Solyc09g009140.3,Solyc11g068690.2,Solyc04g081210.4,Solyc06g005910.4,Solyc11g017460.3,Solyc02g067990.3,Solyc04g077020.3,Solyc08g081330.4,Solyc07g042560.4,Solyc08g036600.3,Solyc02g091780.1,Solyc10g008790.3,Solyc04g081490.3,Solyc07g042580.3,Solyc01g110380.3,Solyc06g069130.4,Solyc07g064970.4,Solyc05g006550.4,Solyc03g025730.3,Solyc03g120810.4,Solyc12g005230.3,Solyc08g008460.2,Solyc08g…	0.0179084
Solyc10g007690.3	100761	105104	160986	6850	18996	23500	2374.53	2456.43	3189.59	162.873	441.226	574.694	4.46e-12	-5.06128	Cellular component	ribonucleoprotein complex	GO:1990904	3	0.00100668	1.2748	125	371	3586	13568	Solyc03g025630.3,Solyc07g047670.3,Solyc03g078290.3,Solyc08g075090.4,Solyc02g078120.2,Solyc08g068340.3,Solyc10g078950.2,Solyc11g072320.3,Solyc11g042610.2,Solyc03g119040.3,Solyc09g090610.3,Solyc06g068400.3,Solyc01g096580.3,Solyc07g008370.4,Solyc02g089070.3,Solyc09g098280.3,Solyc03g120080.4,Solyc11g071490.2,Solyc01g088370.3,Solyc03g112820.4,Solyc01g009100.4,Solyc06g082090.4,Solyc07g053660.3,Solyc04g…	0.0190049
Solyc01g107730.3	190	558	968	47	79	86	3.29113	9.60431	14.1354	0.808183	1.34906	1.54435	2.01e-08	-5.04366	Cellular component	chloroplast	GO:0009507	7	0.00112497	1.18392	240	767	3586	13568	Solyc08g080050.4,Solyc03g025630.3,Solyc10g051110.1,Solyc04g015490.4,Solyc10g017580.3,Solyc07g062820.1,Solyc02g083835.1,Solyc06g069730.3,Solyc05g056050.3,Solyc11g062250.2,Solyc01g095670.4,Solyc12g009980.2,Solyc02g070980.1,Solyc04g071700.3,Solyc12g019740.2,Solyc11g066950.2,Solyc07g063600.3,Solyc00g500208.1,Solyc10g007690.3,Solyc04g081210.4,Solyc08g067320.3,Solyc12g019010.2,Solyc02g071030.2,Solyc08g…	0.0206133
Solyc05g005230.3	103	108	366	4	15	37	4.9956	5.22394	15.0325	0.180707	0.703672	1.83615	3.5e-05	-5.03271	Cellular component	extrinsic component of membrane	GO:0019898	3	0.00138687	1.94585	18	35	3586	13568	Solyc10g054420.2,Solyc01g087040.2,Solyc01g106090.3,Solyc07g055260.3,Solyc04g014610.4,Solyc07g044860.3,Solyc03g114930.3,Solyc02g079950.3,Solyc06g048510.4,Solyc04g064670.3,Solyc08g067840.3,Solyc04g009420.3,Solyc11g008480.2,Solyc05g007780.3,Solyc10g006530.4,Solyc01g007880.4,Solyc06g065490.3,Solyc12g094720.3,	0.0246862
Solyc01g112260.4	523	552	961	72	118	105	14.9304	15.641	23.0622	2.05598	3.29576	3.08365	6.3e-21	-5.02418	Cellular component	translation preinitiation complex	GO:0070993	4	0.00157914	2.27016	12	20	3586	13568	Solyc02g078120.2,Solyc08g068340.3,Solyc02g089070.3,Solyc09g098280.3,Solyc01g088370.3,Solyc08g074790.3,Solyc07g042570.3,Solyc11g013440.2,Solyc06g076150.3,Solyc10g079880.2,Solyc11g017070.2,Solyc08g068330.3,	0.027328
Solyc01g112190.3	198	57	104	21	6	14	1.75472	0.496439	0.771957	0.187103	0.05184	0.120617	3.55e-06	-5.02333	Cellular component	eukaryotic 48S preinitiation complex	GO:0033290	5	0.00157914	2.27016	12	20	3586	13568	Solyc02g078120.2,Solyc08g068340.3,Solyc02g089070.3,Solyc09g098280.3,Solyc01g088370.3,Solyc08g074790.3,Solyc07g042570.3,Solyc11g013440.2,Solyc06g076150.3,Solyc10g079880.2,Solyc11g017070.2,Solyc08g068330.3,	0.027328
Solyc02g086650.3	339	1679	2736	52	313	151	4.88246	24.0166	33.1847	0.754818	4.44019	2.25847	1.35e-05	-4.99966	Cellular component	eukaryotic translation initiation factor 3 complex	GO:0005852	3	0.00157914	2.27016	12	20	3586	13568	Solyc02g078120.2,Solyc08g068340.3,Solyc02g089070.3,Solyc09g098280.3,Solyc01g088370.3,Solyc08g074790.3,Solyc07g042570.3,Solyc11g013440.2,Solyc06g076150.3,Solyc10g079880.2,Solyc11g017070.2,Solyc08g068330.3,	0.027328
Solyc07g055950.3	76	1824	4482	72	99	140	1.78041	42.7165	89.0288	1.70265	2.29493	3.4132	0.00120546	-4.99781	Cellular component	eukaryotic 43S preinitiation complex	GO:0016282	5	0.00157914	2.27016	12	20	3586	13568	Solyc02g078120.2,Solyc08g068340.3,Solyc02g089070.3,Solyc09g098280.3,Solyc01g088370.3,Solyc08g074790.3,Solyc07g042570.3,Solyc11g013440.2,Solyc06g076150.3,Solyc10g079880.2,Solyc11g017070.2,Solyc08g068330.3,	0.027328
Solyc11g019910.1	2982	3135	4604	154	653	634	139.83	145.766	181.487	7.2821	30.1554	30.8203	1.19e-09	-4.99488	Cellular component	oxidoreductase complex	GO:1990204	4	0.001586	1.64504	30	69	3586	13568	Solyc10g054420.2,Solyc01g087040.2,Solyc01g106090.3,Solyc09g064500.3,Solyc01g022750.3,Solyc11g071790.2,Solyc07g064800.3,Solyc06g061070.3,Solyc07g044860.3,Solyc04g016330.3,Solyc02g086880.4,Solyc02g067930.3,Solyc02g090030.2,Solyc02g065400.3,Solyc07g006790.3,Solyc03g114930.3,Solyc02g079950.3,Solyc04g064670.3,Solyc08g067840.3,Solyc04g009420.3,Solyc11g008380.3,Solyc12g005080.2,Solyc11g008480.2,Solyc05g…	0.024702
Solyc07g055780.3	55	70	73	0	9	11	1.3004	1.64218	1.45539	0	0.193674	0.256464	4.73e-05	-4.99335	Cellular component	outer mitochondrial membrane protein complex	GO:0098799	4	0.00184044	3.24309	6	7	3586	13568	Solyc03g150155.1,Solyc07g009320.3,Solyc02g094140.4,Solyc05g047390.1,Solyc01g109220.4,Solyc07g015970.3,	0.0279657
Solyc11g069115.1	42	52	74	5	5	11	1.70838	2.10013	2.5555	0.201373	0.192621	0.45178	8.9e-08	-4.99111	Cellular component	mitochondrial outer membrane translocase complex	GO:0005742	5	0.00184044	3.24309	6	7	3586	13568	Solyc03g150155.1,Solyc07g009320.3,Solyc02g094140.4,Solyc05g047390.1,Solyc01g109220.4,Solyc07g015970.3,	0.0279657
Solyc10g009570.3	4949	5792	10469	414	1005	1447	70.7723	82.1453	125.864	5.97329	14.1649	21.4663	1.78e-10	-4.98446	Cellular component	microtubule	GO:0005874	7	0.00378052	1.46347	41	106	3586	13568	Solyc02g021360.3,Solyc09g009140.3,Solyc06g005910.4,Solyc11g017460.3,Solyc04g077020.3,Solyc08g081330.4,Solyc07g042560.4,Solyc02g091780.1,Solyc10g008790.3,Solyc04g081490.3,Solyc07g042580.3,Solyc01g110380.3,Solyc06g069130.4,Solyc05g006550.4,Solyc03g025730.3,Solyc03g120810.4,Solyc12g005230.3,Solyc08g008460.2,Solyc08g006890.3,Solyc09g063030.4,Solyc08g079760.4,Solyc06g076640.3,Solyc10g084280.2,Solyc10g…	0.0547736
Solyc08g062960.4	946	772	1096	61	171	171	21.1705	17.1182	20.6083	1.37691	3.77004	3.95546	1.97e-13	-4.98284	Cellular component	exoribonuclease complex	GO:1905354	4	0.00405172	2.5224	8	12	3586	13568	Solyc06g075390.4,Solyc06g071460.3,Solyc06g005860.3,Solyc01g095480.4,Solyc09g074090.3,Solyc08g066700.3,Solyc07g045370.3,Solyc10g080130.3,	0.0573687
Solyc08g075490.4	17012	11234	10424	764	2729	2007	228.474	149.619	117.693	10.3506	36.122	27.969	7.06e-11	-4.97712	Cellular component	microtubule associated complex	GO:0005875	3	0.00473307	1.75338	19	41	3586	13568	Solyc02g021360.3,Solyc04g081210.4,Solyc02g067990.3,Solyc12g005050.2,Solyc03g097190.3,Solyc01g066590.3,Solyc01g057310.4,Solyc05g007130.4,Solyc06g072730.4,Solyc03g113540.3,Solyc07g063180.3,Solyc02g093790.3,Solyc02g093800.3,Solyc06g071180.3,Solyc04g008720.4,Solyc02g093810.3,Solyc08g080470.3,Solyc07g063610.4,Solyc12g044240.3,	0.0655268
Solyc03g045070.1	4293	3614	3448	321	826	563	85.5872	71.4451	57.7775	6.45058	16.2243	11.6391	2.04e-17	-4.96439	Cellular component	polymeric cytoskeletal fiber	GO:0099513	6	0.00539283	1.43163	42	111	3586	13568	Solyc02g021360.3,Solyc09g009140.3,Solyc06g005910.4,Solyc11g017460.3,Solyc04g077020.3,Solyc08g081330.4,Solyc07g042560.4,Solyc02g091780.1,Solyc10g008790.3,Solyc04g081490.3,Solyc07g042580.3,Solyc01g110380.3,Solyc06g069130.4,Solyc05g006550.4,Solyc08g065890.3,Solyc03g025730.3,Solyc03g120810.4,Solyc12g005230.3,Solyc08g008460.2,Solyc08g006890.3,Solyc09g063030.4,Solyc08g079760.4,Solyc06g076640.3,Solyc10g…	0.0730377
Solyc06g005710.3	11293	10933	16489	623	1783	2828	166.763	160.116	204.722	9.27573	25.9532	43.3267	1.35e-09	-4.96413	Cellular component	cytosolic ribosome	GO:0022626	7	0.00549745	1.51344	32	80	3586	13568	Solyc03g025630.3,Solyc08g075090.4,Solyc03g119040.3,Solyc09g090610.3,Solyc06g068400.3,Solyc07g008370.4,Solyc11g071490.2,Solyc01g009100.4,Solyc11g065670.1,Solyc09g072865.1,Solyc06g073090.3,Solyc01g010540.3,Solyc06g072490.3,Solyc01g099670.3,Solyc08g006470.4,Solyc06g064460.4,Solyc02g021400.2,Solyc06g072120.3,Solyc02g086240.3,Solyc07g055230.4,Solyc05g007250.3,Solyc10g083740.3,Solyc01g097760.3,Solyc12g…	0.0728705
Solyc02g065400.3	84751	86239	135965	5319	15517	21406	1237.7	1249.03	1669.39	78.378	223.359	324.405	2.85e-10	-4.95568	Cellular component	anchored component of plasma membrane	GO:0046658	5	0.00643879	1.8918	14	28	3586	13568	Solyc01g091530.4,Solyc06g076120.2,Solyc02g080500.3,Solyc07g053540.1,Solyc04g005420.4,Solyc11g072030.3,Solyc10g005100.3,Solyc02g065765.1,Solyc07g049370.2,Solyc12g015690.3,Solyc05g012380.3,Solyc07g048090.2,Solyc07g045440.1,Solyc11g012870.2,	0.0835701
Solyc03g083960.3	3246	2768	2752	507	505	368	55.0683	46.5648	39.2452	8.66601	8.44504	6.47363	7.57e-44	-4.94963	Cellular component	supramolecular fiber	GO:0099512	5	0.00722602	1.39898	44	119	3586	13568	Solyc02g021360.3,Solyc09g009140.3,Solyc06g005910.4,Solyc11g017460.3,Solyc04g077020.3,Solyc01g105200.2,Solyc08g081330.4,Solyc07g042560.4,Solyc02g091780.1,Solyc10g008790.3,Solyc04g081490.3,Solyc07g042580.3,Solyc01g110380.3,Solyc06g069130.4,Solyc05g006550.4,Solyc08g065890.3,Solyc03g025730.3,Solyc03g120810.4,Solyc12g005230.3,Solyc08g008460.2,Solyc08g006890.3,Solyc09g063030.4,Solyc09g074280.1,Solyc08g…	0.0918737
Solanum_lycopersicum_newGene_1942	328	341	437	41	39	81	8.93979	9.21562	10.0092	1.11065	1.02375	2.2792	2.41e-15	-4.9466	Cellular component	supramolecular polymer	GO:0099081	4	0.00722602	1.39898	44	119	3586	13568	Solyc02g021360.3,Solyc09g009140.3,Solyc06g005910.4,Solyc11g017460.3,Solyc04g077020.3,Solyc01g105200.2,Solyc08g081330.4,Solyc07g042560.4,Solyc02g091780.1,Solyc10g008790.3,Solyc04g081490.3,Solyc07g042580.3,Solyc01g110380.3,Solyc06g069130.4,Solyc05g006550.4,Solyc08g065890.3,Solyc03g025730.3,Solyc03g120810.4,Solyc12g005230.3,Solyc08g008460.2,Solyc08g006890.3,Solyc09g063030.4,Solyc09g074280.1,Solyc08g…	0.0918737
Solyc11g007540.2	2630	2949	4064	268	653	523	42.795	47.5904	55.6055	4.40103	10.474	8.8258	4.4e-18	-4.94584	Cellular component	obsolete intracellular part	GO:0044424	0	0.00741498	1.09496	483	1669	3586	13568	Solyc01g090510.2,Solyc05g012920.3,Solyc03g025630.3,Solyc10g051110.1,Solyc10g086170.1,Solyc04g078780.3,Solyc08g029150.3,Solyc11g007570.2,Solyc02g068540.2,Solyc09g007390.3,Solyc07g008000.4,Solyc10g017580.3,Solyc07g062820.1,Solyc02g080130.4,Solyc02g083835.1,Solyc09g061790.1,Solyc12g056390.1,Solyc10g008590.1,Solyc01g112020.3,Solyc11g062250.2,Solyc04g071940.3,Solyc09g007090.4,Solyc03g095730.4,Solyc01g…	0.0905791
Solyc06g084050.4	4563	4486	8014	258	773	1251	201.604	196.556	297.713	11.4935	33.6273	57.3608	1.15e-08	-4.93132	Cellular component	nucleoid	GO:0009295	3	0.00810362	2.32837	8	13	3586	13568	Solyc07g055260.3,Solyc03g082420.3,Solyc05g012100.3,Solyc02g079730.4,Solyc06g048410.4,Solyc03g120230.3,Solyc09g091830.4,Solyc06g005710.3,	0.0970876
Solyc07g054170.3	56	565	856	36	48	72	1.30319	13.0482	16.7728	0.825536	1.09735	1.72571	3.58e-05	-4.92152	Cellular component	exosome (RNase complex)	GO:0000178	5	0.0104464	2.40775	7	11	3586	13568	Solyc06g075390.4,Solyc06g071460.3,Solyc06g005860.3,Solyc01g095480.4,Solyc09g074090.3,Solyc08g066700.3,Solyc10g080130.3,	0.122794
Solyc04g016220.4	786	950	1131	97	198	149	21.5382	25.8187	26.0421	2.67537	5.3336	4.23502	1.71e-24	-4.9188	Cellular component	plastid nucleoid	GO:0042646	6	0.0104464	2.40775	7	11	3586	13568	Solyc03g082420.3,Solyc05g012100.3,Solyc02g079730.4,Solyc06g048410.4,Solyc03g120230.3,Solyc09g091830.4,Solyc06g005710.3,	0.122794
Solyc09g083130.3	9283	5867	6776	540	1138	1561	92.168	57.7648	56.5564	5.40984	11.1309	16.0774	2.04e-12	-4.90627	Cellular component	cytosolic large ribosomal subunit	GO:0022625	6	0.0117908	1.63383	19	44	3586	13568	Solyc08g075090.4,Solyc09g090610.3,Solyc06g068400.3,Solyc07g008370.4,Solyc11g071490.2,Solyc01g009100.4,Solyc11g065670.1,Solyc09g072865.1,Solyc08g006470.4,Solyc06g064460.4,Solyc02g086240.3,Solyc07g055230.4,Solyc10g083740.3,Solyc01g097760.3,Solyc10g085480.2,Solyc10g078660.2,Solyc12g010930.2,Solyc10g007980.3,Solyc06g008170.3,	0.133558
Solyc06g075450.2	36	89	122	8	0	13	0.596768	1.47085	1.72029	0.128567	0	0.219929	0.000309413	-4.90322	Cellular component	mitochondrial matrix	GO:0005759	6	0.0117908	1.63383	19	44	3586	13568	Solyc03g079930.3,Solyc12g005280.3,Solyc03g114050.3,Solyc07g064930.3,Solyc07g055260.3,Solyc05g009140.3,Solyc01g095420.3,Solyc07g006790.3,Solyc07g007450.3,Solyc03g058880.4,Solyc09g089880.3,Solyc06g065800.3,Solyc01g098230.3,Solyc12g005200.3,Solyc03g117080.4,Solyc09g011250.3,Solyc12g014470.2,Solyc10g024320.2,Solyc12g011270.2,	0.133558
Solyc01g095430.3	13189	15258	34115	1360	3487	3911	389.34	446.683	846.688	40.5015	101.444	119.788	4.54e-10	-4.89773	Cellular component	cytoskeleton	GO:0005856	6	0.0118873	1.25091	81	245	3586	13568	Solyc02g021360.3,Solyc12g008590.3,Solyc09g009140.3,Solyc11g068690.2,Solyc07g063590.4,Solyc04g081210.4,Solyc06g005910.4,Solyc03g007480.3,Solyc11g017460.3,Solyc09g010440.3,Solyc02g067990.3,Solyc04g077020.3,Solyc03g025740.4,Solyc08g081330.4,Solyc09g064200.4,Solyc07g042560.4,Solyc08g036600.3,Solyc02g068340.3,Solyc01g099720.2,Solyc02g091780.1,Solyc10g008790.3,Solyc04g081490.3,Solyc05g054480.3,Solyc07g…	0.129926
Solyc12g015690.3	212	400	611	31	60	79	7.27872	13.6453	17.6661	1.05357	2.00993	2.80269	1.09e-09	-4.8931	Cellular component	mitochondrial outer membrane	GO:0005741	7	0.0125782	1.82173	13	27	3586	13568	Solyc03g044010.4,Solyc01g010760.3,Solyc06g007710.4,Solyc09g065130.4,Solyc03g005700.1,Solyc03g150155.1,Solyc07g009320.3,Solyc06g082793.1,Solyc02g094140.4,Solyc05g047390.1,Solyc01g109220.4,Solyc07g015970.3,Solyc02g067460.3,	0.135107
Solyc09g097910.4	2371	2253	2939	214	532	430	41.2093	38.8445	42.9555	3.7423	9.10044	7.7528	4.86e-18	-4.87202	Cellular component	chloroplast nucleoid	GO:0042644	7	0.013293	2.5224	6	9	3586	13568	Solyc03g082420.3,Solyc05g012100.3,Solyc02g079730.4,Solyc06g048410.4,Solyc09g091830.4,Solyc06g005710.3,	0.140365
Solyc02g088100.3	2360	2999	5194	300	433	794	40.9138	51.5604	75.7148	5.24226	7.39686	14.2783	1.8e-11	-4.8639	Cellular component	large ribosomal subunit	GO:0015934	5	0.0141572	1.41365	34	91	3586	13568	Solyc08g075090.4,Solyc09g090610.3,Solyc06g068400.3,Solyc07g008370.4,Solyc11g071490.2,Solyc01g009100.4,Solyc01g095420.3,Solyc03g112360.1,Solyc11g065670.1,Solyc01g087730.4,Solyc02g068770.4,Solyc09g072865.1,Solyc05g009370.4,Solyc03g111230.4,Solyc02g081310.3,Solyc06g071720.1,Solyc06g074300.4,Solyc08g006470.4,Solyc06g064460.4,Solyc02g086240.3,Solyc07g055230.4,Solyc04g017680.3,Solyc10g083740.3,Solyc00g…	0.146999
Solyc02g070920.3	312	324	430	45	61	64	2.26544	2.33538	2.62606	0.323388	0.435392	0.475638	1.77e-29	-4.85812	Cellular component	plastid stroma	GO:0009532	3	0.0151379	1.32426	49	140	3586	13568	Solyc12g009980.2,Solyc12g019740.2,Solyc08g079660.3,Solyc08g076470.4,Solyc02g066920.3,Solyc11g005340.3,Solyc11g065740.2,Solyc02g091530.4,Solyc11g044530.2,Solyc03g082420.3,Solyc02g094420.3,Solyc03g019880.3,Solyc08g068590.4,Solyc03g026210.4,Solyc08g067330.1,Solyc05g005020.4,Solyc06g068480.3,Solyc06g073090.3,Solyc10g006370.3,Solyc01g087190.4,Solyc05g012100.3,Solyc03g120430.3,Solyc07g045540.4,Solyc07g…	0.154605
Solyc12g096870.1	485	388	517	39	91	86	9.1383	7.24364	8.18824	0.740829	1.68158	1.66545	7.39e-16	-4.84868	Cellular component	chloroplast stroma	GO:0009570	4	0.0157613	1.32564	48	137	3586	13568	Solyc12g009980.2,Solyc12g019740.2,Solyc08g079660.3,Solyc08g076470.4,Solyc02g066920.3,Solyc11g005340.3,Solyc11g065740.2,Solyc02g091530.4,Solyc11g044530.2,Solyc03g082420.3,Solyc02g094420.3,Solyc03g019880.3,Solyc08g068590.4,Solyc03g026210.4,Solyc08g067330.1,Solyc05g005020.4,Solyc06g068480.3,Solyc06g073090.3,Solyc10g006370.3,Solyc01g087190.4,Solyc05g012100.3,Solyc03g120430.3,Solyc07g045540.4,Solyc07g…	0.158376
Solyc04g074450.1	443	211	498	22	65	75	12.9064	6.08779	12.2104	0.624138	1.84534	2.26116	2.36e-08	-4.84629	Cellular component	ribosomal subunit	GO:0044391	4	0.0168389	1.30215	53	154	3586	13568	Solyc03g078290.3,Solyc08g075090.4,Solyc11g042610.2,Solyc09g090610.3,Solyc06g068400.3,Solyc01g096580.3,Solyc07g008370.4,Solyc11g071490.2,Solyc01g009100.4,Solyc04g063290.3,Solyc01g095420.3,Solyc03g112360.1,Solyc09g007350.3,Solyc11g065670.1,Solyc01g087730.4,Solyc02g068770.4,Solyc09g072865.1,Solyc07g008660.3,Solyc06g073090.3,Solyc05g009370.4,Solyc01g010540.3,Solyc06g072490.3,Solyc07g041310.3,Solyc03g…	0.166518
Solyc06g048620.3	531	871	1147	118	167	114	3.91911	6.37882	7.12459	0.878743	1.21428	0.871064	6.57e-20	-4.84539	Cellular component	90S preribosome	GO:0030686	5	0.0193989	2.2071	7	12	3586	13568	Solyc03g120080.4,Solyc03g112820.4,Solyc02g081680.4,Solyc10g080180.3,Solyc03g093480.3,Solyc10g039190.2,Solyc05g008190.3,	0.180381
Solyc03g116730.4	2088	3842	5760	252	684	752	41.7964	76.2818	96.9518	5.08143	13.4981	15.6071	1.02e-09	-4.82872	Cellular component	organelle outer membrane	GO:0031968	6	0.0199888	1.58383	18	43	3586	13568	Solyc03g044010.4,Solyc10g017580.3,Solyc01g010760.3,Solyc06g007710.4,Solyc01g104170.3,Solyc09g065130.4,Solyc03g005700.1,Solyc03g150155.1,Solyc07g009320.3,Solyc06g082793.1,Solyc02g094140.4,Solyc05g047390.1,Solyc01g060070.3,Solyc01g109220.4,Solyc01g007880.4,Solyc03g095220.3,Solyc07g015970.3,Solyc02g067460.3,	0.183132
Solyc12g150101.1	2999	3769	5843	268	596	970	115.467	143.931	189.168	10.3962	22.6101	38.7336	5.53e-10	-4.82093	Cellular component	obsolete organelle part	GO:0044422	0	0.0212513	1.15027	159	523	3586	13568	Solyc03g025630.3,Solyc10g051110.1,Solyc10g086170.1,Solyc09g007390.3,Solyc10g017580.3,Solyc02g080130.4,Solyc03g095730.4,Solyc01g095670.4,Solyc12g009980.2,Solyc11g068690.2,Solyc11g072320.3,Solyc12g019740.2,Solyc01g022750.3,Solyc07g055260.3,Solyc02g068420.4,Solyc04g081210.4,Solyc03g119040.3,Solyc02g082840.3,Solyc05g009140.3,Solyc08g079660.3,Solyc04g071930.4,Solyc11g005710.2,Solyc11g017460.3,Solyc04g…	0.191878
Solyc06g082940.3	60713	67721	111645	4676	11076	18903	1815.59	2008.46	2806.99	141.074	326.47	586.604	2.33e-09	-4.81207	Cellular component	obsolete intracellular organelle part	GO:0044446	0	0.0213562	1.15121	157	516	3586	13568	Solyc03g025630.3,Solyc10g051110.1,Solyc10g086170.1,Solyc09g007390.3,Solyc10g017580.3,Solyc02g080130.4,Solyc03g095730.4,Solyc01g095670.4,Solyc12g009980.2,Solyc11g068690.2,Solyc11g072320.3,Solyc12g019740.2,Solyc01g022750.3,Solyc07g055260.3,Solyc02g068420.4,Solyc04g081210.4,Solyc03g119040.3,Solyc02g082840.3,Solyc05g009140.3,Solyc08g079660.3,Solyc04g071930.4,Solyc11g005710.2,Solyc11g017460.3,Solyc04g…	0.19007
Solyc08g065850.1	390	424	920	87	86	93	55.0117	59.3395	109.295	12.3821	11.9764	13.6108	9.14e-15	-4.80832	Cellular component	plasma membrane	GO:0005886	4	0.021588	1.13391	193	644	3586	13568	Solyc01g091530.4,Solyc06g071810.1,Solyc02g068540.2,Solyc11g013310.2,Solyc03g097600.3,Solyc05g008060.4,Solyc11g066770.3,Solyc06g076120.2,Solyc02g091710.3,Solyc05g054560.3,Solyc05g014160.4,Solyc07g054490.3,Solyc02g080500.3,Solyc12g098150.2,Solyc07g055260.3,Solyc02g068300.3,Solyc07g063350.3,Solyc11g011870.3,Solyc02g088620.3,Solyc04g081210.4,Solyc05g054190.4,Solyc03g078000.3,Solyc06g082840.4,Solyc01g…	0.189427
Solyc05g010710.3	186	101	173	6	27	30	4.32198	2.31239	3.36342	0.127924	0.605099	0.704783	6.5e-07	-4.8074	Cellular component	outer membrane	GO:0019867	4	0.0249964	1.51344	20	50	3586	13568	Solyc10g079300.2,Solyc03g044010.4,Solyc10g017580.3,Solyc01g010760.3,Solyc06g007710.4,Solyc01g104170.3,Solyc09g065130.4,Solyc03g005700.1,Solyc03g150155.1,Solyc07g009320.3,Solyc06g082793.1,Solyc02g094140.4,Solyc05g047390.1,Solyc11g071890.3,Solyc01g060070.3,Solyc01g109220.4,Solyc01g007880.4,Solyc03g095220.3,Solyc07g015970.3,Solyc02g067460.3,	0.216289
Solyc01g098570.2	459	265	356	22	90	49	10.7667	6.16149	7.01555	0.513191	2.07644	1.18192	1.05e-08	-4.79586	Cellular component	membrane	GO:0016020	3	0.0253306	1.02531	2040	7528	3586	13568	Solyc08g080050.4,Solyc06g051920.4,Solyc10g011820.4,Solyc11g008960.3,Solyc01g091530.4,Solyc06g051800.3,Solyc10g044470.3,Solyc08g082340.3,Solyc03g113710.4,Solyc08g007460.3,Solyc01g104970.3,Solyc12g042240.2,Solyc08g081320.3,Solyc04g050470.4,Solyc12g055740.2,Solyc01g006950.3,Solyc06g050900.3,Solyc01g005930.3,Solyc11g017270.2,Solyc02g065590.3,Solyc05g013450.4,Solyc02g085480.4,Solyc07g032490.3,Solyc09g…
Solyc06g074030.1	1900	257	1471	134	59	244	65.8865	8.83616	42.8667	4.66254	1.98516	8.77122	2.74e-05	-4.79327	09460.3,Solyc01g057260.4,Solyc06g070960.3,Solyc03g110970.2,Solyc01g111310.3,Solyc12g006540.2,Solyc02g080200.4,Solyc10g078160.2,Solyc04g081300.4,Solyc09g065780.3,Solyc03g113250.4,Solyc10g078280.3,Solyc09g064520.3,Solyc02g081340.3,Solyc08g079280.3,Solyc12g098210.3,Solyc09g011223.1,Solyc08g061100.3,Solyc10g086040.2,Solyc01g007880.4,Solyc12g005140.2,Solyc03g123420.1,Solyc03g121920.3,Solyc07g053130.4,…	0.216178
Solyc08g077060.3	3970	3324	3997	189	844	670	110.993	92.1615	93.9491	5.32668	23.2485	19.4206	2.08e-09	-4.78456	Cellular component	obsolete plasma membrane part	GO:0044459	0	0.0318555	1.49768	19	48	3586	13568	Solyc01g091530.4,Solyc06g076120.2,Solyc02g080500.3,Solyc07g055260.3,Solyc04g014610.4,Solyc07g053540.1,Solyc04g005420.4,Solyc11g072030.3,Solyc02g083540.3,Solyc09g074280.1,Solyc12g015690.3,Solyc08g006970.4,Solyc04g054480.3,Solyc05g012380.3,Solyc07g048090.2,Solyc01g107290.3,Solyc07g007180.4,Solyc07g045440.1,Solyc11g012870.2,	0.268189
Solyc01g080100.3	158	83	90	17	16	17	7.46714	3.88474	3.56402	0.7834	0.708186	0.824072	1.42e-09	-4.78418	Cellular component	integral component of plasma membrane	GO:0005887	5	0.0336131	1.5765	15	36	3586	13568	Solyc03g078000.3,Solyc09g075820.3,Solyc05g054740.3,Solyc02g079220.4,Solyc02g083540.3,Solyc03g096950.4,Solyc11g017010.2,Solyc03g032040.3,Solyc04g054730.3,Solyc11g012450.2,Solyc01g107290.3,Solyc07g007180.4,Solyc10g076480.2,Solyc01g109460.3,Solyc02g086160.4,	0.279213
Solyc09g009010.4	217	638	930	59	60	126	4.79932	13.998	17.3125	1.30555	1.2943	2.88762	1.47e-07	-4.78285	Cellular component	sno(s)RNA-containing ribonucleoprotein complex	GO:0005732	4	0.0344351	2.36475	5	8	3586	13568	Solyc03g112820.4,Solyc09g011420.3,Solyc11g007800.3,Solyc07g054460.4,Solyc05g008190.3,	0.282277
Solyc06g065380.4	524	633	1262	37	154	151	7.7021	9.22638	15.5901	0.549006	2.22277	2.30043	1.24e-07	-4.77225	Biological process	photosynthesis, light harvesting	GO:0009765	5	7.77156e-16	3.49332	31	32	2995	10800	Solyc06g069730.3,Solyc05g056050.3,Solyc02g070980.1,Solyc07g063600.3,Solyc10g007690.3,Solyc08g067320.3,Solyc02g071030.2,Solyc12g009200.2,Solyc09g014520.3,Solyc08g067330.1,Solyc02g070970.1,Solyc12g006140.2,Solyc01g105030.3,Solyc02g070950.1,Solyc02g071000.1,Solyc03g005770.3,Solyc01g105050.3,Solyc03g005760.1,Solyc03g115900.4,Solyc07g022900.4,Solyc12g011280.2,Solyc12g009600.2,Solyc02g071010.1,Solyc02g…	2.60425e-12
Solyc02g089540.3	1268	1848	1066	207	175	292	21.6875	31.352	15.3273	3.55884	2.93642	5.16994	1.82e-16	-4.76386	Biological process	RNA modification	GO:0009451	8	1.12466e-13	1.58866	189	429	2995	10800	Solyc01g090510.2,Solyc05g012920.3,Solyc01g080190.3,Solyc08g029150.3,Solyc07g062820.1,Solyc12g017690.3,Solyc09g061790.1,Solyc10g008590.1,Solyc01g112020.3,Solyc11g062250.2,Solyc04g009210.1,Solyc01g100340.4,Solyc02g093380.1,Solyc07g047620.3,Solyc10g080110.3,Solyc09g082400.2,Solyc02g082970.1,Solyc10g054730.1,Solyc02g079210.3,Solyc01g079320.4,Solyc02g079820.4,Solyc02g077650.2,Solyc02g062910.3,Solyc12g…	1.88436e-10
Solyc01g111330.4	97	262	647	15	61	48	1.83638	4.93866	10.343	0.280708	1.12976	0.947433	2.08e-05	-4.75898	Biological process	ribosome biogenesis	GO:0042254	6	1.04694e-12	1.96276	86	158	2995	10800	Solyc03g123530.4,Solyc07g047670.3,Solyc08g075090.4,Solyc11g072320.3,Solyc10g083600.2,Solyc02g082360.4,Solyc02g068420.4,Solyc03g119040.3,Solyc06g068400.3,Solyc07g008370.4,Solyc02g079415.1,Solyc01g104470.3,Solyc03g120080.4,Solyc03g112820.4,Solyc04g016380.3,Solyc04g081030.3,Solyc07g053660.3,Solyc03g097160.4,Solyc10g005520.3,Solyc11g065670.1,Solyc10g046930.3,Solyc08g008160.4,Solyc01g103720.4,Solyc02g…	1.16943e-09
Solyc03g111690.4	3252	4896	5575	748	533	931	48.5122	72.4402	69.9233	11.2598	7.83216	14.407	3.91e-20	-4.75896	Biological process	organonitrogen compound biosynthetic process	GO:1901566	5	3.35687e-12	1.30542	446	1232	2995	10800	Solyc09g065330.3,Solyc12g055740.2,Solyc06g083180.4,Solyc01g091160.4,Solyc03g120090.1,Solyc08g014340.3,Solyc03g078290.3,Solyc10g086170.1,Solyc06g082650.4,Solyc04g015490.4,Solyc03g083440.4,Solyc01g107550.3,Solyc11g011380.2,Solyc08g065760.3,Solyc02g078120.2,Solyc11g073160.3,Solyc03g112070.4,Solyc12g096300.2,Solyc06g066000.3,Solyc10g005110.3,Solyc04g051860.3,Solyc01g080810.3,Solyc06g068770.3,Solyc06g…	2.81222e-09
Solanum_lycopersicum_newGene_1442	1245	10852	484	156	414	264	61.9955	536.516	20.2521	7.81073	20.2554	13.5682	0.00189019	-4.75804	Biological process	ribonucleoprotein complex biogenesis	GO:0022613	5	1.90267e-11	1.7693	105	214	2995	10800	Solyc03g123530.4,Solyc07g047670.3,Solyc08g075090.4,Solyc02g078120.2,Solyc08g068340.3,Solyc11g072320.3,Solyc10g083600.2,Solyc02g082360.4,Solyc02g068420.4,Solyc03g119040.3,Solyc06g068400.3,Solyc07g008370.4,Solyc02g089070.3,Solyc02g079415.1,Solyc09g098280.3,Solyc01g104470.3,Solyc03g120080.4,Solyc01g088370.3,Solyc03g112820.4,Solyc04g016380.3,Solyc04g081030.3,Solyc07g053660.3,Solyc03g097160.4,Solyc10g…	1.27517e-08
Solyc03g095500.3	45	54	184	0	2	17	1.61855	1.9495	5.64678	0	0.046794	0.627079	0.0015674	-4.75115	Biological process	nucleic acid phosphodiester bond hydrolysis	GO:0090305	7	2.0747e-11	1.58787	155	352	2995	10800	Solyc01g090510.2,Solyc05g012920.3,Solyc01g080190.3,Solyc08g029150.3,Solyc07g062820.1,Solyc09g061790.1,Solyc10g008590.1,Solyc01g112020.3,Solyc11g062250.2,Solyc04g009210.1,Solyc01g100340.4,Solyc02g093380.1,Solyc07g047620.3,Solyc09g082400.2,Solyc01g094650.4,Solyc02g082970.1,Solyc05g009140.3,Solyc01g079320.4,Solyc02g079820.4,Solyc02g077650.2,Solyc02g062910.3,Solyc12g099620.1,Solyc02g070010.1,Solyc11g…	1.15872e-08
Solyc02g090030.2	51500	54173	91150	3739	10632	15061	1137.8	1186.97	1693.08	83.3438	231.505	345.301	2.9e-09	-4.74682	Biological process	cellular amide metabolic process	GO:0043603	5	2.81927e-11	1.3873	287	746	2995	10800	Solyc09g065330.3,Solyc06g083180.4,Solyc03g078290.3,Solyc06g082650.4,Solyc08g065760.3,Solyc02g078120.2,Solyc12g096300.2,Solyc01g080810.3,Solyc06g065390.4,Solyc03g114050.3,Solyc06g066660.4,Solyc08g068340.3,Solyc07g009330.4,Solyc12g008720.2,Solyc11g068820.3,Solyc10g061970.2,Solyc08g080910.3,Solyc09g065270.3,Solyc03g119280.3,Solyc11g042610.2,Solyc07g063960.3,Solyc03g119040.3,Solyc09g090610.3,Solyc05g…	1.34962e-08
Solyc07g045080.3	2032	2430	4133	141	519	605	38.4679	45.6314	65.7935	2.6769	9.67761	11.8729	2.51e-08	-4.73817	Biological process	peptide metabolic process	GO:0006518	6	3.34843e-11	1.39835	273	704	2995	10800	Solyc09g065330.3,Solyc06g083180.4,Solyc03g078290.3,Solyc06g082650.4,Solyc08g065760.3,Solyc02g078120.2,Solyc12g096300.2,Solyc01g080810.3,Solyc06g065390.4,Solyc03g114050.3,Solyc06g066660.4,Solyc08g068340.3,Solyc07g009330.4,Solyc12g008720.2,Solyc11g068820.3,Solyc10g061970.2,Solyc08g080910.3,Solyc09g065270.3,Solyc03g119280.3,Solyc11g042610.2,Solyc07g063960.3,Solyc03g119040.3,Solyc09g090610.3,Solyc05g…	1.40257e-08
Solyc12g089050.3	47	176	269	29	15	20	1.33179	5.0304	6.52425	0.842025	0.401289	0.598848	5.7e-06	-4.7329	Biological process	translation	GO:0006412	8	1.28198e-10	1.40931	247	632	2995	10800	Solyc09g065330.3,Solyc06g083180.4,Solyc03g078290.3,Solyc06g082650.4,Solyc08g065760.3,Solyc02g078120.2,Solyc12g096300.2,Solyc01g080810.3,Solyc06g065390.4,Solyc03g114050.3,Solyc06g066660.4,Solyc08g068340.3,Solyc07g009330.4,Solyc12g008720.2,Solyc11g068820.3,Solyc10g061970.2,Solyc09g065270.3,Solyc03g119280.3,Solyc11g042610.2,Solyc07g063960.3,Solyc03g119040.3,Solyc09g090610.3,Solyc05g054070.4,Solyc06g…	4.77325e-08
Solyc11g009020.2	1466	1671	3686	130	332	525	34.3918	38.8775	72.7185	3.06783	7.66392	12.7656	7.5e-08	-4.72224	Biological process	amide biosynthetic process	GO:0043604	6	1.70509e-10	1.39747	255	658	2995	10800	Solyc09g065330.3,Solyc06g083180.4,Solyc03g078290.3,Solyc06g082650.4,Solyc08g065760.3,Solyc02g078120.2,Solyc12g096300.2,Solyc01g080810.3,Solyc06g065390.4,Solyc03g114050.3,Solyc06g066660.4,Solyc08g068340.3,Solyc07g009330.4,Solyc12g008720.2,Solyc11g068820.3,Solyc10g061970.2,Solyc09g065270.3,Solyc03g119280.3,Solyc11g042610.2,Solyc07g063960.3,Solyc03g119040.3,Solyc09g090610.3,Solyc05g054070.4,Solyc06g…	5.71377e-08
Solyc01g089850.4	523	785	759	46	79	184	16.0292	23.9008	19.5728	1.40264	2.36904	5.85127	2.27e-08	-4.70399	Biological process	peptide biosynthetic process	GO:0043043	7	1.84713e-10	1.40487	247	634	2995	10800	Solyc09g065330.3,Solyc06g083180.4,Solyc03g078290.3,Solyc06g082650.4,Solyc08g065760.3,Solyc02g078120.2,Solyc12g096300.2,Solyc01g080810.3,Solyc06g065390.4,Solyc03g114050.3,Solyc06g066660.4,Solyc08g068340.3,Solyc07g009330.4,Solyc12g008720.2,Solyc11g068820.3,Solyc10g061970.2,Solyc09g065270.3,Solyc03g119280.3,Solyc11g042610.2,Solyc07g063960.3,Solyc03g119040.3,Solyc09g090610.3,Solyc05g054070.4,Solyc06g…	5.62702e-08
Solyc10g054810.2	122	33	42	0	0	10	2.89298	0.767389	0.826694	0	0	0.224112	0.00290807	-4.70395	Biological process	rRNA processing	GO:0006364	10	1.67851e-09	2.12118	50	85	2995	10800	Solyc07g047670.3,Solyc08g075090.4,Solyc11g072320.3,Solyc10g083600.2,Solyc06g068400.3,Solyc07g008370.4,Solyc02g079415.1,Solyc03g120080.4,Solyc03g112820.4,Solyc04g016380.3,Solyc07g053660.3,Solyc03g097160.4,Solyc10g005520.3,Solyc10g046930.3,Solyc01g103720.4,Solyc02g088780.4,Solyc11g072390.2,Solyc08g066180.3,Solyc07g017940.1,Solyc09g011420.3,Solyc01g087670.3,Solyc06g005860.3,Solyc01g095480.4,Solyc01g…	4.68725e-07
Solyc08g074480.1	36091	42152	43025	3391	8939	7831	2512.9	2910.64	2518.59	238.201	613.463	565.806	2.27e-15	-4.6972	Biological process	rRNA metabolic process	GO:0016072	9	2.3816e-09	2.08985	51	88	2995	10800	Solyc07g047670.3,Solyc08g075090.4,Solyc11g072320.3,Solyc10g083600.2,Solyc06g068400.3,Solyc07g008370.4,Solyc02g079415.1,Solyc03g120080.4,Solyc03g112820.4,Solyc04g016380.3,Solyc07g053660.3,Solyc03g097160.4,Solyc10g005520.3,Solyc10g046930.3,Solyc01g103720.4,Solyc02g088780.4,Solyc11g072390.2,Solyc08g066180.3,Solyc07g017940.1,Solyc09g011420.3,Solyc01g087670.3,Solyc06g005860.3,Solyc01g095480.4,Solyc01g…	6.13903e-07
Solyc06g073260.3	12104	17508	25926	1095	3443	3986	229.36	329.023	413.054	20.9326	64.2904	78.3832	3.34e-09	-4.695	Biological process	tetrapyrrole biosynthetic process	GO:0033014	6	1.15183e-08	2.51582	30	43	2995	10800	Solyc04g015490.4,Solyc10g005110.3,Solyc04g079320.4,Solyc07g063350.3,Solyc01g067890.4,Solyc07g066470.3,Solyc03g111360.3,Solyc03g115980.1,Solyc06g073290.1,Solyc04g076870.4,Solyc01g008930.4,Solyc09g014760.4,Solyc01g086650.3,Solyc10g008740.3,Solyc08g077880.3,Solyc01g080860.3,Solyc08g065480.3,Solyc06g048730.3,Solyc08g007180.3,Solyc11g007000.2,Solyc10g077040.2,Solyc03g118240.4,Solyc12g013710.2,Solyc01g…	2.75698e-06
Solyc06g067910.3	251	431	359	54	39	76	4.96938	8.44797	5.97692	1.07168	0.748272	1.54308	1.15e-13	-4.68658	Biological process	porphyrin-containing compound biosynthetic process	GO:0006779	7	3.40488e-08	2.56217	27	38	2995	10800	Solyc04g015490.4,Solyc10g005110.3,Solyc04g079320.4,Solyc07g063350.3,Solyc01g067890.4,Solyc03g111360.3,Solyc03g115980.1,Solyc06g073290.1,Solyc04g076870.4,Solyc09g014760.4,Solyc01g086650.3,Solyc10g008740.3,Solyc08g077880.3,Solyc01g080860.3,Solyc08g065480.3,Solyc06g048730.3,Solyc08g007180.3,Solyc11g007000.2,Solyc10g077040.2,Solyc03g118240.4,Solyc12g013710.2,Solyc01g079090.4,Solyc10g007320.3,Solyc01g…	7.6065e-06
Solyc03g095650.3	290	165	287	56	30	33	4.34824	2.44866	3.61635	0.84479	0.43321	0.503476	1.8e-11	-4.68654	Biological process	carboxylic acid metabolic process	GO:0019752	6	5.70595e-08	1.35301	224	597	2995	10800	Solyc05g056170.3,Solyc01g111120.4,Solyc04g071140.3,Solyc01g005560.3,Solyc05g010260.4,Solyc01g091160.4,Solyc08g014340.3,Solyc10g086170.1,Solyc09g064430.4,Solyc02g085730.3,Solyc07g055210.3,Solyc03g083440.4,Solyc01g107550.3,Solyc11g011380.2,Solyc10g008110.4,Solyc03g112070.4,Solyc04g051860.3,Solyc01g080810.3,Solyc04g071940.3,Solyc07g053720.3,Solyc09g009260.3,Solyc08g068340.3,Solyc08g048450.4,Solyc02g…	1.19504e-05
Solyc09g097860.4	260	237	342	29	48	62	1.6643	1.50558	1.84328	0.186898	0.298924	0.40736	2.83e-15	-4.67884	Biological process	chlorophyll biosynthetic process	GO:0015995	8	9.96098e-08	3.20534	16	18	2995	10800	Solyc04g015490.4,Solyc07g063350.3,Solyc01g067890.4,Solyc03g115980.1,Solyc06g073290.1,Solyc09g014760.4,Solyc10g008740.3,Solyc08g077880.3,Solyc08g007180.3,Solyc10g077040.2,Solyc03g118240.4,Solyc12g013710.2,Solyc01g067290.3,Solyc07g054210.3,Solyc04g015750.3,Solyc10g006900.3,	1.96349e-05
Solyc12g044330.2	2454	6560	7240	511	660	1298	72.6686	192.656	180.259	15.2673	19.2506	39.8767	6.54e-09	-4.67767	Biological process	oxoacid metabolic process	GO:0043436	5	1.12485e-07	1.33837	229	617	2995	10800	Solyc05g056170.3,Solyc01g111120.4,Solyc04g071140.3,Solyc01g005560.3,Solyc05g010260.4,Solyc01g091160.4,Solyc08g014340.3,Solyc10g086170.1,Solyc09g064430.4,Solyc02g085730.3,Solyc07g055210.3,Solyc03g083440.4,Solyc01g107550.3,Solyc11g011380.2,Solyc10g008110.4,Solyc03g112070.4,Solyc04g051860.3,Solyc01g080810.3,Solyc04g071940.3,Solyc07g053720.3,Solyc09g009260.3,Solyc08g068340.3,Solyc08g048450.4,Solyc02g…	2.09409e-05
Solyc02g085760.2	24748	19848	19128	1755	2010	6018	445.107	354.03	289.231	31.8406	35.6305	112.309	1.45e-08	-4.67713	Biological process	organic acid metabolic process	GO:0006082	4	1.59059e-07	1.32883	234	635	2995	10800	Solyc05g056170.3,Solyc01g111120.4,Solyc04g071140.3,Solyc01g005560.3,Solyc05g010260.4,Solyc01g091160.4,Solyc08g014340.3,Solyc10g086170.1,Solyc09g064430.4,Solyc03g006880.3,Solyc02g085730.3,Solyc07g055210.3,Solyc03g083440.4,Solyc01g107550.3,Solyc11g011380.2,Solyc10g008110.4,Solyc03g112070.4,Solyc04g051860.3,Solyc01g080810.3,Solyc04g071940.3,Solyc07g053720.3,Solyc09g009260.3,Solyc08g068340.3,Solyc08g…	2.8053e-05
Solyc05g056060.4	99481	103959	177179	8758	20915	30536	996.695	1032.96	1492.44	88.5337	206.535	317.476	6.82e-10	-4.65399	Biological process	tetrapyrrole metabolic process	GO:0033013	5	1.79894e-07	2.26259	32	51	2995	10800	Solyc04g015490.4,Solyc10g005110.3,Solyc04g079320.4,Solyc07g063350.3,Solyc01g067890.4,Solyc07g066470.3,Solyc03g111360.3,Solyc03g115980.1,Solyc06g073290.1,Solyc04g076870.4,Solyc01g008930.4,Solyc09g014760.4,Solyc01g086650.3,Solyc10g008740.3,Solyc08g077880.3,Solyc06g053980.3,Solyc01g080860.3,Solyc08g065480.3,Solyc06g048730.3,Solyc08g007180.3,Solyc11g007000.2,Solyc10g077040.2,Solyc03g118240.4,Solyc12g…	3.01412e-05
Solyc03g114530.4	40	509	633	28	48	63	0.900409	11.3925	12.0157	0.631313	1.06511	1.47133	0.000146514	-4.65347	Biological process	porphyrin-containing compound metabolic process	GO:0006778	6	5.87749e-07	2.27335	29	46	2995	10800	Solyc04g015490.4,Solyc10g005110.3,Solyc04g079320.4,Solyc07g063350.3,Solyc01g067890.4,Solyc03g111360.3,Solyc03g115980.1,Solyc06g073290.1,Solyc04g076870.4,Solyc09g014760.4,Solyc01g086650.3,Solyc10g008740.3,Solyc08g077880.3,Solyc06g053980.3,Solyc01g080860.3,Solyc08g065480.3,Solyc06g048730.3,Solyc08g007180.3,Solyc11g007000.2,Solyc10g077040.2,Solyc03g118240.4,Solyc12g013710.2,Solyc09g065620.3,Solyc01g…	9.3788e-05
Solyc01g099010.3	1721	1095	1031	210	309	139	32.8818	20.7454	16.5578	4.04723	5.80889	2.74994	1.56e-13	-4.64871	Biological process	pigment biosynthetic process	GO:0046148	4	6.17816e-07	2.10351	35	60	2995	10800	Solyc04g015490.4,Solyc04g079320.4,Solyc07g063350.3,Solyc11g011990.2,Solyc12g041880.2,Solyc01g067890.4,Solyc02g081330.4,Solyc03g115980.1,Solyc06g073290.1,Solyc04g051190.3,Solyc04g076870.4,Solyc09g014760.4,Solyc01g086650.3,Solyc03g123760.3,Solyc10g008740.3,Solyc08g077880.3,Solyc10g083790.3,Solyc08g074682.1,Solyc01g080860.3,Solyc12g008980.3,Solyc08g065480.3,Solyc06g048730.3,Solyc08g007180.3,Solyc11g…	9.41046e-05
Solyc01g094690.4	784	1149	1696	123	201	273	16.6619	24.2133	30.3069	2.63369	4.19798	6.00816	7.66e-13	-4.63586	Biological process	obsolete protein-chromophore linkage	GO:0018298	0	8.57608e-07	2.06058	36	63	2995	10800	Solyc00g500206.1,Solyc06g069730.3,Solyc05g056050.3,Solyc02g070980.1,Solyc07g063600.3,Solyc00g500208.1,Solyc10g007690.3,Solyc08g067320.3,Solyc02g071030.2,Solyc05g053410.4,Solyc01g059870.4,Solyc12g009200.2,Solyc09g014520.3,Solyc08g067330.1,Solyc02g070970.1,Solyc02g071260.3,Solyc12g006140.2,Solyc01g105030.3,Solyc02g070950.1,Solyc02g071000.1,Solyc03g005770.3,Solyc01g105050.3,Solyc03g005760.1,Solyc03g…	0.00012495
Solyc07g005680.4	276	650	728	49	104	111	4.78846	11.1839	10.6254	0.851222	1.77413	1.99769	1.22e-09	-4.62998	Biological process	cellular amino acid metabolic process	GO:0006520	7	1.49243e-06	1.43344	128	322	2995	10800	Solyc05g056170.3,Solyc01g091160.4,Solyc08g014340.3,Solyc09g064430.4,Solyc07g055210.3,Solyc03g083440.4,Solyc01g107550.3,Solyc11g011380.2,Solyc03g112070.4,Solyc04g051860.3,Solyc01g080810.3,Solyc04g071940.3,Solyc07g053720.3,Solyc08g068340.3,Solyc08g048450.4,Solyc02g022930.3,Solyc07g065340.1,Solyc10g083840.1,Solyc09g065640.3,Solyc02g089630.3,Solyc03g119280.3,Solyc09g065520.4,Solyc10g083110.3,Solyc06g…	0.00020838
Solyc09g097890.2	2268	2372	3293	210	612	511	39.9273	41.4037	48.7435	3.7153	10.6202	9.33452	1.09e-12	-4.62584	Biological process	pigment metabolic process	GO:0042440	3	1.50837e-06	1.98592	38	69	2995	10800	Solyc04g015490.4,Solyc04g079320.4,Solyc07g063350.3,Solyc11g011990.2,Solyc12g041880.2,Solyc01g067890.4,Solyc02g081330.4,Solyc03g115980.1,Solyc06g073290.1,Solyc04g051190.3,Solyc04g076870.4,Solyc09g014760.4,Solyc01g086650.3,Solyc03g123760.3,Solyc10g008740.3,Solyc08g077880.3,Solyc10g083790.3,Solyc06g053980.3,Solyc08g074682.1,Solyc01g080860.3,Solyc12g008980.3,Solyc08g065480.3,Solyc06g048730.3,Solyc08g…	0.000202182
Solyc12g005310.2	35	112	71	0	8	14	0.503607	1.60004	0.853875	0	0.11307	0.206296	0.000787365	-4.62026	Biological process	chlorophyll metabolic process	GO:0015994	7	1.98828e-06	2.70451	18	24	2995	10800	Solyc04g015490.4,Solyc07g063350.3,Solyc01g067890.4,Solyc03g115980.1,Solyc06g073290.1,Solyc09g014760.4,Solyc10g008740.3,Solyc08g077880.3,Solyc06g053980.3,Solyc08g007180.3,Solyc10g077040.2,Solyc03g118240.4,Solyc12g013710.2,Solyc09g065620.3,Solyc01g067290.3,Solyc07g054210.3,Solyc04g015750.3,Solyc10g006900.3,	0.000256258
Solyc07g066150.1	30896	34112	59344	2574	7038	10151	1931.66	2115.12	3119.37	162.35	433.698	658.57	1.08e-08	-4.59853	Biological process	ribosomal large subunit biogenesis	GO:0042273	6	2.54929e-06	2.19496	28	46	2995	10800	Solyc07g047670.3,Solyc08g075090.4,Solyc10g083600.2,Solyc02g082360.4,Solyc02g068420.4,Solyc06g068400.3,Solyc07g008370.4,Solyc01g104470.3,Solyc04g016380.3,Solyc11g065670.1,Solyc08g008160.4,Solyc01g103720.4,Solyc02g088780.4,Solyc02g081680.4,Solyc09g011420.3,Solyc01g006090.3,Solyc01g096800.3,Solyc08g006470.4,Solyc04g072260.3,Solyc02g086240.3,Solyc07g055230.4,Solyc10g083740.3,Solyc01g006170.4,Solyc10g…	0.000316395
Solyc04g064940.3	641	894	941	123	179	143	5.26882	7.28333	6.50041	1.01879	1.44932	1.21833	1.85e-33	-4.59689	Biological process	small molecule metabolic process	GO:0044281	3	3.56199e-06	1.21064	374	1114	2995	10800	Solyc05g056170.3,Solyc01g111120.4,Solyc04g071140.3,Solyc12g099000.3,Solyc01g005560.3,Solyc03g114730.3,Solyc05g010260.4,Solyc01g091160.4,Solyc03g120090.1,Solyc02g072470.4,Solyc08g014340.3,Solyc10g086170.1,Solyc09g064430.4,Solyc03g006880.3,Solyc02g085730.3,Solyc07g055210.3,Solyc03g083440.4,Solyc01g107550.3,Solyc12g038670.2,Solyc09g007390.3,Solyc11g011380.2,Solyc10g008110.4,Solyc05g005180.3,Solyc11g…	0.000426294
Solyc08g078020.1	7832	8992	14614	1332	1804	2314	470.416	535.679	738.035	80.6836	106.781	144.239	8.47e-19	-4.59167	Biological process	photosynthesis	GO:0015979	4	4.42214e-06	1.47787	100	244	2995	10800	Solyc08g080050.4,Solyc10g054420.2,Solyc00g500206.1,Solyc08g006930.3,Solyc12g044280.2,Solyc04g015490.4,Solyc01g087040.2,Solyc06g069730.3,Solyc01g106090.3,Solyc05g056050.3,Solyc01g095670.4,Solyc02g070980.1,Solyc09g064500.3,Solyc07g063600.3,Solyc00g500208.1,Solyc10g007690.3,Solyc03g120640.3,Solyc04g005180.4,Solyc08g067320.3,Solyc02g071030.2,Solyc12g150101.1,Solyc07g044860.3,Solyc12g009200.2,Solyc03g…	0.000510986
Solyc04g008040.4	3693	4006	6569	492	1135	856	41.6182	44.7756	62.2467	5.58529	12.6037	10.0101	3.53e-15	-4.57511	Biological process	proline metabolic process	GO:0006560	10	7.22099e-05	3.24541	9	10	2995	10800	Solyc04g071940.3,Solyc08g048450.4,Solyc02g089630.3,Solyc08g048460.2,Solyc02g068640.3,Solyc02g091320.4,Solyc04g071960.3,Solyc08g043170.4,Solyc06g019170.3,	0.00806585
Solyc04g009030.3	58896	63372	111425	5407	15628	17470	1046.32	1116.55	1664.27	96.9208	273.654	322.062	1.06e-09	-4.57249	Biological process	alpha-amino acid metabolic process	GO:1901605	8	0.00012349	1.46244	73	180	2995	10800	Solyc05g056170.3,Solyc01g091160.4,Solyc08g014340.3,Solyc03g083440.4,Solyc01g107550.3,Solyc11g011380.2,Solyc03g112070.4,Solyc04g071940.3,Solyc08g048450.4,Solyc02g022930.3,Solyc07g065340.1,Solyc10g083840.1,Solyc02g089630.3,Solyc09g065520.4,Solyc10g083110.3,Solyc06g061070.3,Solyc08g083110.4,Solyc08g065220.3,Solyc10g081510.2,Solyc08g048460.2,Solyc03g026210.4,Solyc12g099930.2,Solyc03g043950.4,Solyc03g…	0.0133489
Solyc06g060520.1	620	678	944	63	135	181	18.9291	20.5024	24.2092	1.93342	4.0403	5.70522	1.42e-11	-4.57075	Biological process	proline biosynthetic process	GO:0006561	11	0.00012549	3.60601	7	7	2995	10800	Solyc04g071940.3,Solyc08g048450.4,Solyc08g048460.2,Solyc02g068640.3,Solyc04g071960.3,Solyc08g043170.4,Solyc06g019170.3,	0.0131411
Solyc10g047110.2	96	119	86	6	19	23	3.0495	3.75267	2.30447	0.172981	0.578466	0.732211	2.02e-07	-4.56586	Biological process	phototropism	GO:0009638	7	0.000235747	3.20534	8	9	2995	10800	Solyc03g116160.1,Solyc01g105680.4,Solyc10g047530.2,Solyc10g081340.1,Solyc06g069880.1,Solyc07g043130.3,Solyc11g072710.3,Solyc05g007480.1,	0.023939
Solyc10g079350.3	53	1396	904	9	22	94	0.998577	26.2728	14.4184	0.160838	0.406903	1.84485	0.00436488	-4.54433	Biological process	response to blue light	GO:0009637	6	0.000259304	2.18936	17	28	2995	10800	Solyc10g081490.2,Solyc03g116160.1,Solyc09g098160.3,Solyc01g105680.4,Solyc11g068380.1,Solyc10g047530.2,Solyc10g081340.1,Solyc06g069880.1,Solyc02g086350.3,Solyc04g080040.3,Solyc09g009420.1,Solyc02g087870.3,Solyc01g005300.4,Solyc07g043130.3,Solyc11g072710.3,Solyc01g068580.4,Solyc05g007480.1,	0.0255567
Solyc06g150138.1	245	324	256	53	66	27	10.474	13.756	9.2255	2.27863	2.77774	1.17788	3.01e-13	-4.54061	Biological process	microtubule-based process	GO:0007017	3	0.000274279	1.42698	74	187	2995	10800	Solyc03g114970.3,Solyc02g021360.3,Solyc09g009140.3,Solyc11g068690.2,Solyc08g013990.3,Solyc02g084390.3,Solyc06g005910.4,Solyc02g067990.3,Solyc04g077020.3,Solyc06g075580.4,Solyc01g098080.3,Solyc07g042560.4,Solyc11g008350.2,Solyc02g068340.3,Solyc11g010560.3,Solyc12g014490.3,Solyc02g091780.1,Solyc04g081490.3,Solyc01g110380.3,Solyc06g069130.4,Solyc07g064970.4,Solyc01g110190.4,Solyc03g025730.3,Solyc08g…	0.0262603
Solyc03g115980.1	37563	40360	78652	3598	10485	11837	742.429	791.122	1306.97	71.7527	204.263	242.784	5.88e-09	-4.53177	Biological process	organonitrogen compound metabolic process	GO:1901564	4	0.0002984	1.09817	765	2512	2995	10800	Solyc05g056170.3,Solyc01g111120.4,Solyc09g065330.3,Solyc12g055740.2,Solyc06g083180.4,Solyc05g010260.4,Solyc01g091160.4,Solyc10g055810.2,Solyc03g025630.3,Solyc03g120090.1,Solyc02g077460.3,Solyc06g071810.1,Solyc08g014340.3,Solyc03g078290.3,Solyc10g086170.1,Solyc09g064430.4,Solyc02g068540.2,Solyc08g062820.3,Solyc06g082650.4,Solyc07g055210.3,Solyc04g015490.4,Solyc03g083440.4,Solyc01g107550.3,Solyc09g…	0.027776
Solyc05g008240.2	218	343	136	4	38	52	23.4923	36.7384	12.3275	0.388406	3.99303	5.81754	0.0001494	-4.52631	Biological process	pyruvate metabolic process	GO:0006090	8	0.000357854	1.83836	26	51	2995	10800	Solyc01g111120.4,Solyc09g009260.3,Solyc07g066610.3,Solyc12g014380.3,Solyc01g109300.3,Solyc04g081400.3,Solyc07g006790.3,Solyc09g092260.4,Solyc04g054820.3,Solyc05g024160.3,Solyc03g114500.4,Solyc04g072800.4,Solyc05g008600.3,Solyc04g076100.4,Solyc03g097680.4,Solyc10g085550.3,Solyc02g084440.4,Solyc10g054870.3,Solyc06g066440.3,Solyc11g065220.2,Solyc01g110360.3,Solyc01g080460.3,Solyc02g062340.3,Solyc07g…	0.03241
Solyc03g113280.3	1184	1828	2432	215	352	396	29.9355	45.8407	51.7208	5.47253	8.75241	10.3858	1.1e-15	-4.52482	Biological process	glutamine family amino acid metabolic process	GO:0009064	9	0.000372833	1.77245	29	59	2995	10800	Solyc01g091160.4,Solyc03g083440.4,Solyc11g011380.2,Solyc04g071940.3,Solyc08g048450.4,Solyc10g083840.1,Solyc02g089630.3,Solyc08g048460.2,Solyc03g043950.4,Solyc03g063560.3,Solyc03g115640.3,Solyc08g081150.4,Solyc03g034320.3,Solyc02g092260.3,Solyc02g068640.3,Solyc04g014510.3,Solyc01g107270.4,Solyc01g080280.3,Solyc10g054440.3,Solyc02g091320.4,Solyc04g071960.3,Solyc02g082190.3,Solyc04g025530.3,Solyc01g…	0.0328779
Solyc11g006040.2	4921	5501	5172	356	1118	1216	44.1481	48.9498	39.0112	3.21741	9.8818	11.3168	4.38e-10	-4.52093	Biological process	cellular component biogenesis	GO:0044085	4	0.000503662	1.2095	215	641	2995	10800	Solyc03g123530.4,Solyc07g047670.3,Solyc03g120340.3,Solyc09g007390.3,Solyc08g075090.4,Solyc12g006000.1,Solyc02g078120.2,Solyc03g031800.3,Solyc02g093690.3,Solyc08g068340.3,Solyc09g009140.3,Solyc11g068690.2,Solyc10g079350.3,Solyc11g072320.3,Solyc10g083600.2,Solyc02g082360.4,Solyc08g013990.3,Solyc02g072160.4,Solyc02g068420.4,Solyc01g094650.4,Solyc03g119040.3,Solyc06g084020.4,Solyc08g079170.3,Solyc03g…	0.0432762
Solyc01g007810.1	499	676	630	38	103	159	15.3245	20.5834	16.2702	1.16177	3.09862	5.06077	2.64e-08	-4.51343	Biological process	small molecule biosynthetic process	GO:0044283	4	0.000552562	1.28018	131	369	2995	10800	Solyc05g056170.3,Solyc03g120090.1,Solyc08g014340.3,Solyc10g086170.1,Solyc03g006880.3,Solyc02g085730.3,Solyc03g083440.4,Solyc01g107550.3,Solyc11g011380.2,Solyc05g005180.3,Solyc11g073160.3,Solyc03g112070.4,Solyc04g051860.3,Solyc04g071940.3,Solyc08g048450.4,Solyc04g054740.3,Solyc07g065340.1,Solyc05g009270.4,Solyc12g014380.3,Solyc10g083840.1,Solyc04g079320.4,Solyc12g011033.1,Solyc04g005180.4,Solyc12g…	0.0462908
Solyc07g054580.3	230	493	619	42	88	95	3.25134	6.93333	7.37692	0.592412	1.22545	1.39204	3.31e-09	-4.5122	Biological process	photosynthesis, light reaction	GO:0019684	5	0.000561943	1.48645	54	131	2995	10800	Solyc08g080050.4,Solyc00g500206.1,Solyc06g069730.3,Solyc05g056050.3,Solyc01g095670.4,Solyc02g070980.1,Solyc07g063600.3,Solyc10g007690.3,Solyc04g005180.4,Solyc08g067320.3,Solyc02g071030.2,Solyc12g009200.2,Solyc09g014520.3,Solyc06g074200.4,Solyc02g090030.2,Solyc03g026210.4,Solyc02g065400.3,Solyc08g067330.1,Solyc07g054290.1,Solyc02g079950.3,Solyc02g070970.1,Solyc09g076030.4,Solyc03g122000.4,Solyc12g…	0.0459286
Solyc11g007690.3	6023	5409	5616	499	1107	1418	80.1	71.3473	62.7951	6.69332	14.5117	19.5589	2.19e-12	-4.50861	Biological process	nucleoside diphosphate metabolic process	GO:0009132	8	0.000642333	1.94919	20	37	2995	10800	Solyc01g111120.4,Solyc09g009260.3,Solyc07g066610.3,Solyc12g014380.3,Solyc04g081400.3,Solyc07g048010.4,Solyc04g054820.3,Solyc03g114500.4,Solyc04g072800.4,Solyc05g008600.3,Solyc04g076100.4,Solyc10g085550.3,Solyc02g084440.4,Solyc10g054870.3,Solyc06g066440.3,Solyc11g065220.2,Solyc01g110360.3,Solyc02g062340.3,Solyc07g065900.3,Solyc10g083570.3,	0.051249
Solyc05g032680.4	40	66	77	12	4	12	0.764513	1.25544	1.25912	0.225004	0.059327	0.238944	3.06e-06	-4.50309	Biological process	nucleotide phosphorylation	GO:0046939	7	0.000642333	1.94919	20	37	2995	10800	Solyc01g111120.4,Solyc09g009260.3,Solyc07g066610.3,Solyc12g014380.3,Solyc04g081400.3,Solyc04g054820.3,Solyc03g114500.4,Solyc04g072800.4,Solyc05g008600.3,Solyc04g076100.4,Solyc10g085550.3,Solyc02g084440.4,Solyc11g072410.2,Solyc10g054870.3,Solyc06g066440.3,Solyc11g065220.2,Solyc01g110360.3,Solyc02g062340.3,Solyc07g065900.3,Solyc10g083570.3,	0.051249
Solyc09g015170.4	122	155	291	30	23	42	1.19882	1.51033	2.41436	0.289381	0.221505	0.428541	3.84e-09	-4.49193	Biological process	alpha-amino acid biosynthetic process	GO:1901607	9	0.000749781	1.53085	45	106	2995	10800	Solyc08g014340.3,Solyc03g083440.4,Solyc01g107550.3,Solyc11g011380.2,Solyc03g112070.4,Solyc04g071940.3,Solyc08g048450.4,Solyc07g065340.1,Solyc10g083840.1,Solyc09g065520.4,Solyc10g083110.3,Solyc10g081510.2,Solyc08g048460.2,Solyc03g026210.4,Solyc12g099930.2,Solyc03g043950.4,Solyc03g063560.3,Solyc07g061940.4,Solyc12g010840.2,Solyc12g035190.2,Solyc03g044660.3,Solyc10g012370.3,Solyc02g092260.3,Solyc02g…	0.0571027
Solyc02g085950.4	40246	64124	118745	3711	18911	13009	1302.41	2058.02	3230.78	121.155	603.209	436.861	1.19e-06	-4.48981	Biological process	protein-tetrapyrrole linkage	GO:0017006	7	0.000760729	3.15526	7	8	2995	10800	Solyc05g053410.4,Solyc01g059870.4,Solyc02g071260.3,Solyc09g005870.1,Solyc07g045480.3,Solyc06g068760.3,Solyc03g033990.1,	0.056649
Solyc01g109700.3	5624	5907	4929	502	743	1599	87.2586	90.8925	64.2947	7.85565	11.3507	25.7422	1.05e-09	-4.48761	Biological process	ribosomal large subunit assembly	GO:0000027	8	0.000885179	2.19496	14	23	2995	10800	Solyc10g083600.2,Solyc02g068420.4,Solyc01g104470.3,Solyc04g016380.3,Solyc11g065670.1,Solyc01g096800.3,Solyc04g072260.3,Solyc02g086240.3,Solyc07g055230.4,Solyc10g083740.3,Solyc10g085480.2,Solyc10g078660.2,Solyc12g010930.2,Solyc10g007980.3,	0.0644833
Solyc07g053540.1	1847	1538	2391	86	371	482	68.4235	56.4918	74.4957	3.20268	13.5316	18.5225	6.74e-07	-4.48241	Biological process	response to heat	GO:0009408	5	0.000903039	1.60267	36	81	2995	10800	Solyc04g071940.3,Solyc11g012830.3,Solyc08g079170.3,Solyc07g040690.3,Solyc09g011650.4,Solyc04g054180.4,Solyc03g082420.3,Solyc08g062437.1,Solyc12g015880.2,Solyc09g011590.4,Solyc06g011380.2,Solyc04g009770.3,Solyc09g005120.3,Solyc09g011540.2,Solyc02g088610.4,Solyc11g011210.2,Solyc06g011370.4,Solyc02g080410.3,Solyc06g076520.1,Solyc09g011550.3,Solyc06g084420.1,Solyc11g006460.3,Solyc06g076570.4,Solyc09g…	0.0643847
Solyc08g068490.3	1464	1392	2157	116	358	392	27.6225	26.0398	34.2243	2.19555	6.6447	7.67471	2e-09	-4.47971	Biological process	plastid organization	GO:0009657	6	0.00103856	1.68668	29	62	2995	10800	Solyc04g063240.3,Solyc02g092310.4,Solyc03g082420.3,Solyc02g094420.3,Solyc04g008570.4,Solyc12g010650.1,Solyc11g010560.3,Solyc06g008510.3,Solyc01g107200.4,Solyc09g042710.3,Solyc10g006370.3,Solyc10g081100.3,Solyc02g086350.3,Solyc10g077090.2,Solyc05g012100.3,Solyc11g005190.3,Solyc02g087560.1,Solyc04g080040.3,Solyc01g008160.4,Solyc07g065050.4,Solyc10g006330.3,Solyc11g012670.1,Solyc11g072710.3,Solyc02g…	0.0725045
Solyc01g110600.2	163	204	175	16	23	52	8.99955	11.1748	8.1254	0.873262	1.24687	2.96553	5.24e-08	-4.47384	Biological process	cellular macromolecule biosynthetic process	GO:0034645	6	0.00126864	1.13792	367	1163	2995	10800	Solyc09g065330.3,Solyc12g055740.2,Solyc06g083180.4,Solyc03g078290.3,Solyc06g082650.4,Solyc08g006907.1,Solyc08g065760.3,Solyc02g078120.2,Solyc12g096300.2,Solyc01g080810.3,Solyc06g068770.3,Solyc06g065390.4,Solyc03g114050.3,Solyc06g066660.4,Solyc06g064490.2,Solyc08g068340.3,Solyc07g009330.4,Solyc12g008720.2,Solyc11g068820.3,Solyc10g061970.2,Solyc10g078950.2,Solyc01g111920.3,Solyc07g055260.3,Solyc08g…	0.0867595
Solyc05g032690.2	35	60	114	8	10	14	1.52807	2.59935	4.19248	0.322063	0.419952	0.615829	5.66e-06	-4.47288	Biological process	purine nucleoside diphosphate metabolic process	GO:0009135	9	0.00128117	1.90317	19	36	2995	10800	Solyc01g111120.4,Solyc09g009260.3,Solyc07g066610.3,Solyc12g014380.3,Solyc04g081400.3,Solyc04g054820.3,Solyc03g114500.4,Solyc04g072800.4,Solyc05g008600.3,Solyc04g076100.4,Solyc10g085550.3,Solyc02g084440.4,Solyc10g054870.3,Solyc06g066440.3,Solyc11g065220.2,Solyc01g110360.3,Solyc02g062340.3,Solyc07g065900.3,Solyc10g083570.3,	0.085864
Solyc01g105050.3	52081	57772	103931	4104	11129	19593	1340.79	1475.01	2249.52	106.6	282.397	523.42	3.13e-07	-4.46966	Biological process	purine ribonucleoside diphosphate metabolic process	GO:0009179	10	0.00128117	1.90317	19	36	2995	10800	Solyc01g111120.4,Solyc09g009260.3,Solyc07g066610.3,Solyc12g014380.3,Solyc04g081400.3,Solyc04g054820.3,Solyc03g114500.4,Solyc04g072800.4,Solyc05g008600.3,Solyc04g076100.4,Solyc10g085550.3,Solyc02g084440.4,Solyc10g054870.3,Solyc06g066440.3,Solyc11g065220.2,Solyc01g110360.3,Solyc02g062340.3,Solyc07g065900.3,Solyc10g083570.3,	0.085864
Solyc05g014260.3	4645	6095	5503	1099	1123	924	70.1266	91.2707	69.8592	16.7297	16.7048	14.4749	8.76e-60	-4.45319	Biological process	ribonucleoside diphosphate metabolic process	GO:0009185	9	0.00128117	1.90317	19	36	2995	10800	Solyc01g111120.4,Solyc09g009260.3,Solyc07g066610.3,Solyc12g014380.3,Solyc04g081400.3,Solyc04g054820.3,Solyc03g114500.4,Solyc04g072800.4,Solyc05g008600.3,Solyc04g076100.4,Solyc10g085550.3,Solyc02g084440.4,Solyc10g054870.3,Solyc06g066440.3,Solyc11g065220.2,Solyc01g110360.3,Solyc02g062340.3,Solyc07g065900.3,Solyc10g083570.3,	0.085864
Solyc10g081810.3	318	373	711	22	108	96	15.2125	17.7105	28.6492	1.04902	5.07499	4.73893	2.14e-06	-4.45174	Biological process	ADP metabolic process	GO:0046031	11	0.00128117	1.90317	19	36	2995	10800	Solyc01g111120.4,Solyc09g009260.3,Solyc07g066610.3,Solyc12g014380.3,Solyc04g081400.3,Solyc04g054820.3,Solyc03g114500.4,Solyc04g072800.4,Solyc05g008600.3,Solyc04g076100.4,Solyc10g085550.3,Solyc02g084440.4,Solyc10g054870.3,Solyc06g066440.3,Solyc11g065220.2,Solyc01g110360.3,Solyc02g062340.3,Solyc07g065900.3,Solyc10g083570.3,	0.085864
Solyc10g052550.1	47	42	67	7	5	13	2.95076	2.60791	3.558	0.443008	0.289885	0.839306	2.01e-06	-4.44739	Biological process	glycolytic process	GO:0006096	13	0.00128117	1.90317	19	36	2995	10800	Solyc01g111120.4,Solyc09g009260.3,Solyc07g066610.3,Solyc12g014380.3,Solyc04g081400.3,Solyc04g054820.3,Solyc03g114500.4,Solyc04g072800.4,Solyc05g008600.3,Solyc04g076100.4,Solyc10g085550.3,Solyc02g084440.4,Solyc10g054870.3,Solyc06g066440.3,Solyc11g065220.2,Solyc01g110360.3,Solyc02g062340.3,Solyc07g065900.3,Solyc10g083570.3,	0.085864
Solyc05g007830.3	2568	2727	3768	577	278	745	61.2472	64.5018	75.54	13.8795	6.51459	18.4379	2.53e-11	-4.44552	Biological process	nucleoside diphosphate phosphorylation	GO:0006165	9	0.00128117	1.90317	19	36	2995	10800	Solyc01g111120.4,Solyc09g009260.3,Solyc07g066610.3,Solyc12g014380.3,Solyc04g081400.3,Solyc04g054820.3,Solyc03g114500.4,Solyc04g072800.4,Solyc05g008600.3,Solyc04g076100.4,Solyc10g085550.3,Solyc02g084440.4,Solyc10g054870.3,Solyc06g066440.3,Solyc11g065220.2,Solyc01g110360.3,Solyc02g062340.3,Solyc07g065900.3,Solyc10g083570.3,	0.085864
Solyc10g086580.2	152966	161574	188322	11245	38246	39579	2352.26	2464.12	2434.75	174.472	579.697	631.587	1.74e-09	-4.44336	Biological process	ATP generation from ADP	GO:0006757	12	0.00128117	1.90317	19	36	2995	10800	Solyc01g111120.4,Solyc09g009260.3,Solyc07g066610.3,Solyc12g014380.3,Solyc04g081400.3,Solyc04g054820.3,Solyc03g114500.4,Solyc04g072800.4,Solyc05g008600.3,Solyc04g076100.4,Solyc10g085550.3,Solyc02g084440.4,Solyc10g054870.3,Solyc06g066440.3,Solyc11g065220.2,Solyc01g110360.3,Solyc02g062340.3,Solyc07g065900.3,Solyc10g083570.3,	0.085864
Solyc01g065700.3	319	266	203	17	65	55	5.94261	4.92761	3.17783	0.305732	1.1903	1.0658	1.6e-07	-4.43429	Biological process	chloroplast organization	GO:0009658	7	0.00139002	1.73366	25	52	2995	10800	Solyc04g063240.3,Solyc02g092310.4,Solyc03g082420.3,Solyc02g094420.3,Solyc04g008570.4,Solyc12g010650.1,Solyc11g010560.3,Solyc06g008510.3,Solyc01g107200.4,Solyc09g042710.3,Solyc10g006370.3,Solyc02g086350.3,Solyc05g012100.3,Solyc11g005190.3,Solyc02g087560.1,Solyc04g080040.3,Solyc01g008160.4,Solyc07g065050.4,Solyc10g006330.3,Solyc11g012670.1,Solyc11g072710.3,Solyc02g079730.4,Solyc09g091830.4,Solyc01g…	0.0817187
Solyc03g112540.4	71	89	148	23	13	17	1.49297	1.85343	2.6294	0.47893	0.269305	0.361578	1.4e-08	-4.4249	Biological process	lipid metabolic process	GO:0006629	4	0.00156697	1.18879	210	637	2995	10800	Solyc10g011820.4,Solyc12g055740.2,Solyc10g055680.1,Solyc02g085360.4,Solyc03g006880.3,Solyc02g085730.3,Solyc09g007390.3,Solyc12g096660.3,Solyc10g005840.4,Solyc10g008110.4,Solyc10g017580.3,Solyc05g055760.3,Solyc06g054010.3,Solyc11g010850.2,Solyc05g052760.4,Solyc03g119720.4,Solyc04g071940.3,Solyc04g054740.3,Solyc05g009270.4,Solyc07g042630.4,Solyc01g101240.4,Solyc11g011990.2,Solyc03g005320.3,Solyc11g…	0.090533
Solyc03g005770.3	123584	155357	189717	12006	32520	39653	3748.6	4673.47	4838.12	367.434	972.249	1248.15	5.18e-10	-4.41264	Biological process	dicarboxylic acid biosynthetic process	GO:0043650	8	0.00159574	2.3333	11	17	2995	10800	Solyc03g083440.4,Solyc04g049350.4,Solyc01g008930.4,Solyc07g062810.4,Solyc10g079830.3,Solyc03g063560.3,Solyc02g083590.3,Solyc01g091190.3,Solyc04g074480.3,Solyc05g050980.3,Solyc11g009080.2,	0.0906327
Solyc01g090180.4	245	283	328	47	81	33	6.13843	7.02942	6.90306	1.17608	1.9816	0.84	1.65e-13	-4.40548	Biological process	ribosomal small subunit biogenesis	GO:0042274	6	0.00166796	1.98952	16	29	2995	10800	Solyc11g072320.3,Solyc03g120080.4,Solyc04g081030.3,Solyc07g053660.3,Solyc11g072390.2,Solyc09g011420.3,Solyc05g012120.3,Solyc04g051670.3,Solyc01g099670.3,Solyc02g021400.2,Solyc06g072120.3,Solyc02g032920.3,Solyc10g080180.3,Solyc03g093480.3,Solyc10g039190.2,Solyc05g008190.3,	0.0931556
Solyc07g044860.3	127400	130001	219669	11340	32396	40641	2475.48	2505.17	3588.56	222.334	620.434	819.471	8.99e-09	-4.39734	Biological process	microtubule-based movement	GO:0007018	4	0.00178301	1.58664	33	75	2995	10800	Solyc02g084390.3,Solyc06g075580.4,Solyc01g098080.3,Solyc07g042560.4,Solyc11g008350.2,Solyc02g068340.3,Solyc11g010560.3,Solyc02g091780.1,Solyc01g110380.3,Solyc06g069130.4,Solyc01g110190.4,Solyc08g081100.4,Solyc03g120810.4,Solyc04g040110.3,Solyc11g072820.3,Solyc11g010920.3,Solyc08g042040.4,Solyc10g054080.3,Solyc03g053080.3,Solyc12g011290.2,Solyc04g081060.3,Solyc07g064030.4,Solyc01g057310.4,Solyc01g…	0.0979488
Solyc01g087970.3	1111	1542	1894	218	284	363	16.6301	22.899	23.8381	3.28143	4.18866	5.64116	5.07e-20	-4.3961	Biological process	monocarboxylic acid metabolic process	GO:0032787	7	0.00181245	1.34553	75	201	2995	10800	Solyc05g056170.3,Solyc01g111120.4,Solyc05g010260.4,Solyc10g086170.1,Solyc02g085730.3,Solyc10g008110.4,Solyc04g051860.3,Solyc04g071940.3,Solyc09g009260.3,Solyc07g066610.3,Solyc05g009270.4,Solyc12g014380.3,Solyc03g005320.3,Solyc01g109300.3,Solyc08g067260.4,Solyc08g078390.4,Solyc04g081400.3,Solyc02g086880.4,Solyc11g072980.1,Solyc12g009260.3,Solyc12g094450.3,Solyc12g006930.2,Solyc12g099440.3,Solyc07g…	0.0979599
Solyc04g049340.3	386	447	736	57	130	103	5.9901	6.88319	9.60075	0.890273	1.98875	1.65815	4.43e-12	-4.39461	Biological process	glycine metabolic process	GO:0006544	10	0.00220123	2.49647	9	13	2995	10800	Solyc06g061070.3,Solyc08g065220.3,Solyc12g099930.2,Solyc02g091560.3,Solyc12g098490.2,Solyc05g053810.3,Solyc08g065490.3,Solyc08g007040.3,Solyc02g080810.3,	0.117084
Solyc07g047940.4	989	848	740	75	196	207	15.0528	12.7913	9.47111	1.14409	2.94027	3.25963	2e-10	-4.39147	Biological process	formation of cytoplasmic translation initiation complex	GO:0001732	8	0.00247754	2.16361	12	20	2995	10800	Solyc02g078120.2,Solyc08g068340.3,Solyc02g089070.3,Solyc09g098280.3,Solyc01g088370.3,Solyc08g074790.3,Solyc07g042570.3,Solyc11g013440.2,Solyc06g076150.3,Solyc10g079880.2,Solyc11g017070.2,Solyc08g068330.3,	0.129722
Solyc09g065620.3	784	482	950	66	159	177	18.1563	11.0607	18.5049	1.52089	3.61215	4.23949	1.46e-09	-4.38758	Biological process	cellular amino acid biosynthetic process	GO:0008652	8	0.00285563	1.43048	48	121	2995	10800	Solyc08g014340.3,Solyc03g083440.4,Solyc01g107550.3,Solyc11g011380.2,Solyc03g112070.4,Solyc04g051860.3,Solyc04g071940.3,Solyc08g048450.4,Solyc07g065340.1,Solyc10g083840.1,Solyc09g065520.4,Solyc10g083110.3,Solyc06g064550.3,Solyc10g081510.2,Solyc08g048460.2,Solyc03g026210.4,Solyc12g099930.2,Solyc03g043950.4,Solyc03g063560.3,Solyc07g061940.4,Solyc12g010840.2,Solyc12g035190.2,Solyc03g044660.3,Solyc10g…	0.147219
Solyc04g074640.4	2706	2846	6500	239	751	1030	52.4621	54.7241	105.952	4.66335	14.3416	20.7062	8.95e-07	-4.38689	Biological process	dicarboxylic acid metabolic process	GO:0043648	7	0.00287081	1.72461	22	46	2995	10800	Solyc03g083440.4,Solyc03g115990.3,Solyc10g083110.3,Solyc09g075450.3,Solyc11g007990.2,Solyc04g049350.4,Solyc01g008930.4,Solyc07g062810.4,Solyc03g026210.4,Solyc10g079830.3,Solyc03g063560.3,Solyc03g044660.3,Solyc02g083590.3,Solyc01g091190.3,Solyc02g088460.4,Solyc04g074480.3,Solyc11g017240.3,Solyc05g050980.3,Solyc03g071590.3,Solyc04g025530.3,Solyc03g098240.3,Solyc11g009080.2,	0.145759
Solanum_lycopersicum_newGene_1438	65	39	44	0	10	9	3.14507	1.84528	1.78571	0	0.470293	0.412957	0.00084943	-4.38646	Biological process	lipid catabolic process	GO:0016042	5	0.00300237	1.54543	33	77	2995	10800	Solyc10g008110.4,Solyc05g052760.4,Solyc03g096070.3,Solyc08g078390.4,Solyc02g090490.3,Solyc02g065090.4,Solyc04g079250.3,Solyc04g082000.4,Solyc12g094450.3,Solyc08g080130.3,Solyc06g082000.4,Solyc08g066800.4,Solyc08g066790.4,Solyc07g056670.3,Solyc10g076710.3,Solyc01g103230.3,Solyc11g032200.2,Solyc04g079240.3,Solyc06g051620.3,Solyc04g079230.4,Solyc10g079770.3,Solyc03g005020.3,Solyc04g054890.3,Solyc01g…	0.150164
Solyc08g006790.4	37	39	106	7	2	15	1.47427	1.52711	3.56726	0.25054	0.076744	0.612792	0.000396802	-4.37778	Biological process	maturation of SSU-rRNA	GO:0030490	11	0.00307903	2.20367	11	18	2995	10800	Solyc11g072320.3,Solyc03g120080.4,Solyc07g053660.3,Solyc11g072390.2,Solyc09g011420.3,Solyc02g021400.2,Solyc02g032920.3,Solyc10g080180.3,Solyc03g093480.3,Solyc10g039190.2,Solyc05g008190.3,	0.151733
Solyc06g083680.3	14604	15770	24958	1798	3126	5157	479.907	513.969	689.575	59.6092	101.248	175.858	1.87e-10	-4.37286	Biological process	translational elongation	GO:0006414	7	0.00341414	2.03818	13	23	2995	10800	Solyc07g009330.4,Solyc01g011000.3,Solyc06g074430.4,Solyc06g073090.3,Solyc01g104370.4,Solyc01g009447.1,Solyc12g099820.1,Solyc04g081310.3,Solyc03g115650.4,Solyc12g010060.2,Solyc01g016470.3,Solyc12g011270.2,Solyc01g090690.4,	0.165808
Solyc06g073290.1	7362	8449	14110	1057	1925	2554	256.28	291.695	412.983	37.1088	66.0491	92.2466	8.06e-12	-4.36948	Biological process	cellular polysaccharide catabolic process	GO:0044247	7	0.00410071	1.86117	16	31	2995	10800	Solyc01g110340.4,Solyc12g062250.2,Solyc12g055970.3,Solyc05g005020.4,Solyc05g005080.3,Solyc08g083210.3,Solyc09g075360.4,Solyc02g020980.4,Solyc08g082250.3,Solyc11g008820.2,Solyc11g040340.3,Solyc07g049300.3,Solyc07g049290.3,Solyc04g081300.4,Solyc11g007830.2,Solyc12g013750.2,	0.196307
Solyc02g080310.2	793	899	1304	116	243	216	11.8427	13.304	16.3627	1.74819	3.5722	3.33418	3.47e-15	-4.35576	Biological process	ribonucleoprotein complex assembly	GO:0022618	7	0.00415597	1.47342	38	93	2995	10800	Solyc02g078120.2,Solyc08g068340.3,Solyc10g083600.2,Solyc02g068420.4,Solyc02g089070.3,Solyc09g098280.3,Solyc01g104470.3,Solyc03g120080.4,Solyc01g088370.3,Solyc04g016380.3,Solyc11g065670.1,Solyc02g062240.3,Solyc08g074790.3,Solyc09g064660.4,Solyc07g042570.3,Solyc05g055260.4,Solyc10g006250.3,Solyc11g013440.2,Solyc06g076150.3,Solyc07g054460.4,Solyc01g099670.3,Solyc01g096800.3,Solyc02g021400.2,Solyc06g…	0.19615
Solyc03g121900.1	22	412	1286	23	27	65	1.85075	35.0228	92.8613	1.92351	2.24526	5.72492	0.00590091	-4.35304	Biological process	ribonucleoprotein complex subunit organization	GO:0071826	6	0.00415597	1.47342	38	93	2995	10800	Solyc02g078120.2,Solyc08g068340.3,Solyc10g083600.2,Solyc02g068420.4,Solyc02g089070.3,Solyc09g098280.3,Solyc01g104470.3,Solyc03g120080.4,Solyc01g088370.3,Solyc04g016380.3,Solyc11g065670.1,Solyc02g062240.3,Solyc08g074790.3,Solyc09g064660.4,Solyc07g042570.3,Solyc05g055260.4,Solyc10g006250.3,Solyc11g013440.2,Solyc06g076150.3,Solyc07g054460.4,Solyc01g099670.3,Solyc01g096800.3,Solyc02g021400.2,Solyc06g…	0.19615
Solyc01g102610.3	7827	7873	5560	969	2154	1033	75.9272	75.7447	45.3453	9.48239	20.5928	10.3994	4.46e-13	-4.35177	Biological process	cytoplasmic translational initiation	GO:0002183	5	0.0043323	2.06058	12	21	2995	10800	Solyc02g078120.2,Solyc08g068340.3,Solyc02g089070.3,Solyc09g098280.3,Solyc01g088370.3,Solyc08g074790.3,Solyc07g042570.3,Solyc11g013440.2,Solyc06g076150.3,Solyc10g079880.2,Solyc11g017070.2,Solyc08g068330.3,	0.198871
Solyc01g088620.3	56	60	101	2	13	18	1.71396	1.81748	2.6151	0.058505	0.37249	0.553053	9.8e-05	-4.34913	Biological process	carboxylic acid biosynthetic process	GO:0046394	7	0.00434732	1.27108	92	261	2995	10800	Solyc05g056170.3,Solyc08g014340.3,Solyc10g086170.1,Solyc02g085730.3,Solyc03g083440.4,Solyc01g107550.3,Solyc11g011380.2,Solyc03g112070.4,Solyc04g051860.3,Solyc04g071940.3,Solyc08g048450.4,Solyc07g065340.1,Solyc05g009270.4,Solyc10g083840.1,Solyc04g079320.4,Solyc12g011033.1,Solyc03g005320.3,Solyc09g065520.4,Solyc10g083110.3,Solyc08g067260.4,Solyc06g064550.3,Solyc04g049350.4,Solyc01g008930.4,Solyc11g…	0.196863
Solyc03g064010.4	60	157	313	17	22	43	0.768792	2.00759	3.40753	0.22114	0.279817	0.577994	3.68e-05	-4.34707	Biological process	glucose metabolic process	GO:0006006	7	0.00435365	1.9417	14	26	2995	10800	Solyc04g009030.3,Solyc12g014380.3,Solyc06g071920.4,Solyc02g093830.4,Solyc02g020940.3,Solyc04g076100.4,Solyc04g082630.3,Solyc05g015950.3,Solyc02g020980.4,Solyc07g045540.4,Solyc10g005510.3,Solyc05g052600.4,Solyc12g094640.3,Solyc06g073320.3,	0.194521
Solyc05g014700.3	109	185	184	3	21	45	3.36705	5.68676	4.7986	0.091275	0.616578	1.42183	0.000267918	-4.34062	Biological process	protein refolding	GO:0042026	4	0.00465007	2.31815	9	14	2995	10800	Solyc05g053470.3,Solyc09g091180.3,Solyc06g011380.2,Solyc02g088610.4,Solyc06g011370.4,Solyc03g121640.3,Solyc04g011440.4,Solyc05g010240.4,Solyc02g068730.3,	0.205031
Solyc06g060640.1	8196	13654	19844	1161	3981	2493	557.963	921.832	1135.8	79.7244	267.121	176.125	1.46e-08	-4.33428	Biological process	ribosome assembly	GO:0042255	8	0.00467141	1.71715	20	42	2995	10800	Solyc10g083600.2,Solyc02g082360.4,Solyc02g068420.4,Solyc01g104470.3,Solyc03g120080.4,Solyc04g016380.3,Solyc11g065670.1,Solyc01g099670.3,Solyc01g096800.3,Solyc02g021400.2,Solyc06g072120.3,Solyc04g072260.3,Solyc02g086240.3,Solyc07g055230.4,Solyc10g083740.3,Solyc10g085480.2,Solyc10g078660.2,Solyc12g010930.2,Solyc01g098100.2,Solyc10g007980.3,	0.203298
Solyc02g079950.3	71555	74034	125097	6944	18881	23678	1808.35	1855.58	2658.01	177.073	470.316	620.979	7.51e-09	-4.33112	Biological process	macromolecule modification	GO:0043412	5	0.00488711	1.1168	367	1185	2995	10800	Solyc12g055740.2,Solyc01g090510.2,Solyc05g012920.3,Solyc03g025630.3,Solyc02g077460.3,Solyc06g071810.1,Solyc01g080190.3,Solyc08g029150.3,Solyc02g068540.2,Solyc07g062820.1,Solyc12g017690.3,Solyc09g061790.1,Solyc10g008590.1,Solyc06g068770.3,Solyc02g091710.3,Solyc01g112020.3,Solyc11g062250.2,Solyc01g107730.3,Solyc06g064490.2,Solyc03g031670.3,Solyc02g082730.3,Solyc08g076910.3,Solyc06g061180.2,Solyc04g…	0.209958
Solyc03g097380.4	1892	3183	4741	309	691	803	35.7128	59.6102	75.2691	5.8861	12.8557	15.7225	2.45e-09	-4.32689	Biological process	glutamine family amino acid biosynthetic process	GO:0009084	10	0.00526164	1.86518	15	29	2995	10800	Solyc03g083440.4,Solyc11g011380.2,Solyc04g071940.3,Solyc08g048450.4,Solyc10g083840.1,Solyc08g048460.2,Solyc03g043950.4,Solyc03g063560.3,Solyc02g092260.3,Solyc02g068640.3,Solyc04g014510.3,Solyc01g080280.3,Solyc04g071960.3,Solyc08g043170.4,Solyc06g019170.3,	0.223187
Solyc12g057010.3	35	54	65	0	9	11	0.605661	0.933301	0.963038	0	0.147838	0.186968	0.00101541	-4.32006	Biological process	glucan catabolic process	GO:0009251	7	0.00526164	1.86518	15	29	2995	10800	Solyc01g110340.4,Solyc12g062250.2,Solyc12g055970.3,Solyc05g005020.4,Solyc05g005080.3,Solyc08g083210.3,Solyc09g075360.4,Solyc02g020980.4,Solyc08g082250.3,Solyc11g008820.2,Solyc11g040340.3,Solyc07g049300.3,Solyc07g049290.3,Solyc04g081300.4,Solyc11g007830.2,	0.223187
Solyc10g008720.4	953	1062	1430	124	262	281	24.3586	26.9292	30.7354	3.18559	6.59587	7.44975	1.19e-13	-4.31846	Biological process	maturation of SSU-rRNA from tricistronic rRNA transcript (SSU-rRNA, 5.8S rRNA, LSU-rRNA)	GO:0000462	12	0.00560259	2.40401	8	12	2995	10800	Solyc11g072320.3,Solyc03g120080.4,Solyc07g053660.3,Solyc11g072390.2,Solyc02g032920.3,Solyc10g080180.3,Solyc03g093480.3,Solyc05g008190.3,	0.231781
Solyc02g020940.3	10348	13118	22203	1735	3250	3726	184.671	232.173	333.122	31.2246	57.1545	68.9935	5.63e-12	-4.30643	Biological process	organic acid biosynthetic process	GO:0016053	5	0.00582131	1.24823	99	286	2995	10800	Solyc05g056170.3,Solyc08g014340.3,Solyc10g086170.1,Solyc03g006880.3,Solyc02g085730.3,Solyc03g083440.4,Solyc01g107550.3,Solyc11g011380.2,Solyc03g112070.4,Solyc04g051860.3,Solyc04g071940.3,Solyc08g048450.4,Solyc07g065340.1,Solyc05g009270.4,Solyc10g083840.1,Solyc04g079320.4,Solyc12g011033.1,Solyc03g005320.3,Solyc09g065520.4,Solyc10g083110.3,Solyc08g067260.4,Solyc06g064550.3,Solyc11g008780.3,Solyc04g…	0.237893
Solyc09g009000.4	32	76	114	13	10	14	4.01382	9.39645	12.0634	1.5816	1.17476	1.72721	9.99e-06	-4.30068	Biological process	amino sugar metabolic process	GO:0006040	5	0.0061168	1.80301	16	32	2995	10800	Solyc10g055810.2,Solyc01g095670.4,Solyc10g055820.3,Solyc02g061770.4,Solyc08g077260.3,Solyc04g072000.4,Solyc09g098540.3,Solyc09g042770.4,Solyc05g052170.4,Solyc10g055780.1,Solyc09g009780.4,Solyc12g098810.2,Solyc07g062543.1,Solyc02g082930.3,Solyc02g082920.4,Solyc10g055800.2,	0.241146
Solyc07g053450.4	217	184	391	11	55	66	4.30784	3.62621	6.54689	0.211072	1.06442	1.36414	1.99e-05	-4.30008	Biological process	ether metabolic process	GO:0018904	4	0.00658414	2.52421	7	10	2995	10800	Solyc04g071560.4,Solyc10g006970.3,Solyc04g080850.3,Solyc07g063190.3,Solyc05g006830.3,Solyc12g013810.2,Solyc10g008390.3,	0.256552
Solyc02g085933.1	72574	61916	133938	5615	25350	17688	7172.1	6068.37	11128.4	559.85	2469.24	1813.94	4.36e-07	-4.29272	Biological process	glycerol ether metabolic process	GO:0006662	5	0.00658414	2.52421	7	10	2995	10800	Solyc04g071560.4,Solyc10g006970.3,Solyc04g080850.3,Solyc07g063190.3,Solyc05g006830.3,Solyc12g013810.2,Solyc10g008390.3,	0.256552
Solyc04g077380.2	130	155	230	23	50	26	3.71538	4.39979	5.53094	0.637027	1.40903	0.747242	4.2e-10	-4.28287	Biological process	mitochondrial RNA modification	GO:1900864	9	0.00676127	1.86978	14	27	2995	10800	Solyc01g080190.3,Solyc02g062910.3,Solyc02g085650.4,Solyc09g092150.1,Solyc04g080120.1,Solyc01g100800.2,Solyc05g009253.1,Solyc04g009000.1,Solyc03g112420.3,Solyc11g017370.3,Solyc01g094850.3,Solyc06g082880.2,Solyc01g049810.4,Solyc12g011400.3,	0.257466
Solyc08g083370.4	148	356	372	24	67	67	4.69957	11.2058	9.92739	0.753866	2.08376	2.18463	4.98e-07	-4.28251	Biological process	pseudouridine synthesis	GO:0001522	9	0.00676127	1.86978	14	27	2995	10800	Solyc02g081810.4,Solyc02g093460.4,Solyc07g017260.2,Solyc01g097600.2,Solyc07g054460.4,Solyc07g017250.4,Solyc10g078540.3,Solyc01g107580.4,Solyc11g008360.3,Solyc01g103560.3,Solyc04g082130.4,Solyc02g080320.4,Solyc04g081910.4,Solyc04g082070.4,	0.257466
Solyc01g108630.3	1953	1785	2958	253	491	567	26.2031	23.7555	33.3768	3.41621	6.49646	7.88802	4.87e-13	-4.28016	Biological process	isopentenyl diphosphate biosynthetic process	GO:0009240	8	0.00739493	2.70451	6	8	2995	10800	Solyc05g055760.3,Solyc01g109300.3,Solyc11g007020.2,Solyc09g092260.4,Solyc04g009650.4,Solyc01g098840.3,	0.275338
Solyc06g054260.1	80233	80977	145926	10771	19899	27992	3528.21	3531.53	5395.09	477.909	862.475	1277.38	1.31e-10	-4.27749	Biological process	isopentenyl diphosphate metabolic process	GO:0046490	7	0.00739493	2.70451	6	8	2995	10800	Solyc05g055760.3,Solyc01g109300.3,Solyc11g007020.2,Solyc09g092260.4,Solyc04g009650.4,Solyc01g098840.3,	0.275338
Solyc10g086660.2	2349	3627	5496	392	827	961	25.804	39.5203	50.7769	4.3411	8.94872	10.9552	5.47e-10	-4.27482	Biological process	chloroplast accumulation movement	GO:0009904	9	0.00755088	3.00501	5	6	2995	10800	Solyc11g010560.3,Solyc09g042710.3,Solyc02g086350.3,Solyc04g080040.3,Solyc11g072710.3,	0.275033
Solyc01g095450.4	80	102	164	10	5	37	1.63331	2.06695	2.82642	0.198476	0.081004	0.768994	0.000254412	-4.25789	Biological process	regulation of protein serine/threonine phosphatase activity	GO:0080163	11	0.00755088	3.00501	5	6	2995	10800	Solyc06g061180.2,Solyc09g090970.4,Solyc08g076960.1,Solyc09g090990.2,Solyc09g090980.3,	0.275033
Solyc01g107650.3	821	1384	1672	195	341	243	8.4292	14.0915	14.4308	2.01916	3.44954	2.58469	1.59e-15	-4.25462	Biological process	isoprenoid biosynthetic process	GO:0008299	7	0.00771442	1.45069	35	87	2995	10800	Solyc03g006880.3,Solyc10g005840.4,Solyc05g055760.3,Solyc11g010850.2,Solyc04g071940.3,Solyc07g042630.4,Solyc11g011990.2,Solyc12g041880.2,Solyc01g109300.3,Solyc01g067890.4,Solyc02g081330.4,Solyc07g052150.4,Solyc04g051190.3,Solanum_lycopersicum_newGene_2480,Solyc11g007020.2,Solyc03g123760.3,Solyc09g092260.4,Solyc04g009650.4,Solyc08g077880.3,Solyc10g083790.3,Solyc04g077860.4,Solyc04g070980.4,Solyc09g…	0.275011
Solyc02g005180.3	1091	1704	1619	208	390	303	17.5138	27.1243	21.8473	3.35999	6.16465	5.04485	1.77e-18	-4.25446	Biological process	mRNA modification	GO:0016556	9	0.00786105	1.80301	15	30	2995	10800	Solyc01g080190.3,Solyc02g062910.3,Solyc07g042760.1,Solyc02g085650.4,Solyc09g092150.1,Solyc04g080120.1,Solyc01g100800.2,Solyc05g009253.1,Solyc04g009000.1,Solyc08g013850.1,Solyc04g016540.2,Solyc11g017370.3,Solyc01g094850.3,Solyc06g082880.2,Solyc01g049810.4,	0.277288
Solyc12g098900.2	396	197	108	27	46	54	12.0538	5.93164	2.74588	0.809326	1.35453	1.70369	8.76e-06	-4.25409	Biological process	glucan metabolic process	GO:0044042	6	0.00845833	1.32608	57	155	2995	10800	Solyc01g110340.4,Solyc12g062250.2,Solyc03g031800.3,Solyc10g078950.2,Solyc08g082650.2,Solyc11g066270.3,Solyc11g017460.3,Solyc01g073750.4,Solyc03g113450.4,Solyc12g055970.3,Solyc01g105200.2,Solyc02g091530.4,Solyc09g009190.4,Solyc08g082660.2,Solyc01g079790.4,Solyc05g005020.4,Solyc07g056000.2,Solyc07g052980.3,Solyc04g071650.4,Solyc05g005080.3,Solyc03g083090.4,Solyc02g071020.3,Solyc08g082670.4,Solyc07g…	0.295249
Solyc11g006460.3	56159	62679	43347	12753	10841	10186	920.035	1018.37	597.045	210.804	175.056	173.159	2.61e-26	-4.25078	Biological process	cellular glucan metabolic process	GO:0006073	7	0.00845833	1.32608	57	155	2995	10800	Solyc01g110340.4,Solyc12g062250.2,Solyc03g031800.3,Solyc10g078950.2,Solyc08g082650.2,Solyc11g066270.3,Solyc11g017460.3,Solyc01g073750.4,Solyc03g113450.4,Solyc12g055970.3,Solyc01g105200.2,Solyc02g091530.4,Solyc09g009190.4,Solyc08g082660.2,Solyc01g079790.4,Solyc05g005020.4,Solyc07g056000.2,Solyc07g052980.3,Solyc04g071650.4,Solyc05g005080.3,Solyc03g083090.4,Solyc02g071020.3,Solyc08g082670.4,Solyc07g…	0.295249
Solyc07g007250.4	164	9192	122	90	126	90	8.64849	482.409	5.39944	4.79636	6.55094	4.9405	0.0104614	-4.2384	Biological process	lipid biosynthetic process	GO:0008610	5	0.00884065	1.21662	111	329	2995	10800	Solyc12g055740.2,Solyc10g055680.1,Solyc02g085360.4,Solyc03g006880.3,Solyc02g085730.3,Solyc10g005840.4,Solyc10g017580.3,Solyc05g055760.3,Solyc11g010850.2,Solyc04g071940.3,Solyc04g054740.3,Solyc05g009270.4,Solyc07g042630.4,Solyc11g011990.2,Solyc03g005320.3,Solyc11g017400.2,Solyc11g011200.2,Solyc12g041880.2,Solyc01g109300.3,Solyc08g067260.4,Solyc01g067890.4,Solyc02g081330.4,Solyc08g076470.4,Solyc07g…	0.302296
Solyc10g017960.2	423	437	233	40	93	82	11.9747	12.2792	5.55553	1.13212	2.59531	2.38969	1.05e-08	-4.23706	Biological process	isoprenoid metabolic process	GO:0006720	6	0.00931154	1.40634	39	100	2995	10800	Solyc03g006880.3,Solyc10g005840.4,Solyc05g055760.3,Solyc11g010850.2,Solyc04g071940.3,Solyc07g042630.4,Solyc11g011990.2,Solyc12g041880.2,Solyc01g109300.3,Solyc01g067890.4,Solyc02g081330.4,Solyc07g052150.4,Solyc04g051190.3,Solanum_lycopersicum_newGene_2480,Solyc11g007020.2,Solyc07g056670.3,Solyc03g123760.3,Solyc09g092260.4,Solyc04g009650.4,Solyc08g077880.3,Solyc10g083790.3,Solyc04g077860.4,Solyc04g…	0.315182
Solyc07g039310.1	219	198	318	43	58	49	3.89934	3.50516	4.76662	0.763791	1.01916	0.905141	1.52e-17	-4.2355	Biological process	beta-glucan metabolic process	GO:0051273	8	0.00944163	1.4512	33	82	2995	10800	Solyc01g110340.4,Solyc08g082650.2,Solyc11g017460.3,Solyc01g073750.4,Solyc03g113450.4,Solyc12g055970.3,Solyc01g105200.2,Solyc08g082660.2,Solyc04g071650.4,Solyc05g005080.3,Solyc08g082670.4,Solyc08g083210.3,Solyc09g075550.3,Solyc11g005560.3,Solyc11g005980.3,Solyc09g075360.4,Solyc02g065765.1,Solyc08g082250.3,Solyc07g051820.3,Solyc11g008820.2,Solyc12g014430.2,Solyc08g076320.3,Solyc04g054480.3,Solyc01g…	0.316389
Solyc08g069010.4	1739	2158	3889	171	522	730	21.6517	26.6454	40.7186	2.14494	6.40008	9.42135	9.64e-07	-4.22635	Biological process	response to abiotic stimulus	GO:0009628	3	0.00992172	1.16875	164	506	2995	10800	Solyc03g006880.3,Solyc08g006907.1,Solyc10g081490.2,Solyc06g069730.3,Solyc06g076120.2,Solyc02g091710.3,Solyc04g071940.3,Solyc05g014160.4,Solyc07g063350.3,Solyc03g116160.1,Solyc08g080660.1,Solyc10g084430.2,Solyc11g012830.3,Solyc08g079170.3,Solyc07g040690.3,Solyc02g082350.3,Solyc04g071930.4,Solyc05g053410.4,Solyc11g017460.3,Solyc01g059870.4,Solyc08g080670.1,Solyc09g098160.3,Solyc09g011650.4,Solyc09g…	0.329185
Solyc11g072840.1	41	133	325	22	20	36	3.54021	11.5917	24.0891	1.90468	1.65964	3.2495	0.00018466	-4.21429	Biological process	cellular lipid metabolic process	GO:0044255	5	0.0103127	1.19568	126	380	2995	10800	Solyc12g055740.2,Solyc03g006880.3,Solyc12g096660.3,Solyc10g005840.4,Solyc10g008110.4,Solyc10g017580.3,Solyc05g055760.3,Solyc06g054010.3,Solyc11g010850.2,Solyc04g071940.3,Solyc04g054740.3,Solyc05g009270.4,Solyc07g042630.4,Solyc11g011990.2,Solyc03g005320.3,Solyc11g017400.2,Solyc11g011200.2,Solyc12g041880.2,Solyc01g109300.3,Solyc08g067260.4,Solyc01g067890.4,Solyc08g078390.4,Solyc02g081330.4,Solyc08g…	0.338803
Solyc12g038343.1	168	125	174	18	39	37	7.13284	5.26505	6.22316	0.771971	1.61047	1.63124	2.27e-10	-4.19961	Biological process	chorismate metabolic process	GO:0046417	8	0.0110448	2.21908	8	13	2995	10800	Solyc04g049350.4,Solyc02g083590.3,Solyc01g091190.3,Solyc02g088460.4,Solyc04g074480.3,Solyc11g017240.3,Solyc05g050980.3,Solyc11g009080.2,	0.359331
Solyc03g110990.1	46	38	67	8	8	12	6.35834	5.18261	7.74734	1.03791	1.04315	1.66859	1.46e-06	-4.19646	Biological process	response to carbohydrate	GO:0009743	5	0.0112242	1.8814	12	23	2995	10800	Solyc02g068540.2,Solyc10g081490.2,Solyc04g071940.3,Solyc05g014160.4,Solyc03g120080.4,Solyc02g077780.3,Solyc01g100800.2,Solyc04g009000.1,Solyc04g071960.3,Solyc06g068670.3,Solyc03g117890.3,Solyc06g010260.3,	0.361657
Solyc10g074540.1	601	764	1351	85	183	253	15.9942	20.1814	30.2434	2.27928	4.79081	6.985	4.75e-08	-4.19072	Biological process	translational initiation	GO:0006413	4	0.0112242	1.8814	12	23	2995	10800	Solyc02g078120.2,Solyc08g068340.3,Solyc02g089070.3,Solyc09g098280.3,Solyc01g088370.3,Solyc08g074790.3,Solyc07g042570.3,Solyc11g013440.2,Solyc06g076150.3,Solyc10g079880.2,Solyc11g017070.2,Solyc08g068330.3,	0.361657
Solyc04g074440.1	671	168	560	68	77	116	19.5158	4.83763	13.6912	1.97703	2.20204	3.49288	3.03e-06	-4.18692	Biological process	mitochondrial mRNA modification	GO:0080156	10	0.0112242	1.8814	12	23	2995	10800	Solyc01g080190.3,Solyc02g062910.3,Solyc02g085650.4,Solyc09g092150.1,Solyc04g080120.1,Solyc01g100800.2,Solyc05g009253.1,Solyc04g009000.1,Solyc11g017370.3,Solyc01g094850.3,Solyc06g082880.2,Solyc01g049810.4,	0.361657
Solyc01g006330.4	2341	2551	4193	228	746	791	45.5818	49.2568	68.6315	4.4664	14.3176	15.9779	7.77e-08	-4.1781	Biological process	glucan biosynthetic process	GO:0009250	8	0.0115895	1.4424	32	80	2995	10800	Solyc10g078950.2,Solyc08g082650.2,Solyc11g017460.3,Solyc01g073750.4,Solyc03g113450.4,Solyc01g105200.2,Solyc02g091530.4,Solyc09g009190.4,Solyc08g082660.2,Solyc01g079790.4,Solyc04g071650.4,Solyc03g083090.4,Solyc02g071020.3,Solyc08g082670.4,Solyc09g075550.3,Solyc11g005560.3,Solyc11g005980.3,Solyc02g065765.1,Solyc07g051820.3,Solyc12g014430.2,Solyc05g052600.4,Solyc08g076320.3,Solyc08g083320.4,Solyc04g…	0.362956
Solyc08g083240.3	178	290	363	29	59	75	2.70944	4.3895	4.65413	0.443536	0.888417	1.18268	1.46e-08	-4.17406	Biological process	cell redox homeostasis	GO:0045454	6	0.0115895	1.4424	32	80	2995	10800	Solyc05g056300.4,Solyc04g078910.3,Solyc02g084710.3,Solyc12g019740.2,Solyc04g071560.4,Solyc10g006970.3,Solyc02g064950.3,Solyc01g100320.3,Solyc11g069690.3,Solyc04g081740.3,Solyc05g053100.3,Solyc09g009820.4,Solyc11g012730.3,Solyc03g095500.3,Solyc04g080850.3,Solyc06g083690.3,Solyc05g005460.3,Solyc09g091840.4,Solyc10g078920.3,Solyc04g049450.3,Solyc04g074240.3,Solyc07g063190.3,Solyc02g087630.3,Solyc07g…	0.362956
Solyc11g042630.3	652	331	407	23	155	78	21.0003	10.5569	11.0185	0.738212	4.92212	2.60471	3.56e-05	-4.17354	Biological process	tricarboxylic acid cycle	GO:0006099	4	0.0118534	1.60267	20	45	2995	10800	Solyc01g005560.3,Solyc06g083790.3,Solyc01g007910.3,Solyc03g115990.3,Solyc07g064800.3,Solyc09g075450.3,Solyc11g007990.2,Solyc04g011350.3,Solyc01g106480.4,Solyc12g011000.2,Solyc02g086610.4,Solyc08g077920.3,Solyc12g005080.2,Solanum_lycopersicum_newGene_2665,Solyc07g055060.3,Solyc05g054640.4,Solyc02g093680.3,Solyc10g074500.2,Solyc09g015490.3,Solyc01g073740.4,	0.364409
Solyc10g084880.3	889	133	463	94	63	106	14.5454	2.1575	6.36186	1.54424	1.00752	1.79782	6.22e-05	-4.17048	Biological process	tropism	GO:0009606	4	0.0128085	1.55553	22	51	2995	10800	Solyc02g091710.3,Solyc03g116160.1,Solyc10g084430.2,Solyc05g010030.4,Solyc01g107180.3,Solyc01g105680.4,Solyc12g088930.1,Solyc10g047530.2,Solyc07g062310.4,Solyc05g010010.1,Solyc10g081340.1,Solyc06g069880.1,Solyc02g083110.1,Solyc09g007060.2,Solyc05g015880.3,Solyc06g072360.3,Solyc02g087870.3,Solyc07g043130.3,Solyc11g072710.3,Solyc05g007480.1,Solyc03g114390.1,Solyc02g072140.1,	0.390192
Solyc12g010380.3	4048	3405	4798	569	1100	936	48.7979	40.7114	48.6285	6.91111	13.0596	11.6987	7.11e-19	-4.16694	Biological process	cytidine to uridine editing	GO:0016554	10	0.0137895	2.29473	7	11	2995	10800	Solyc02g079210.3,Solyc01g066060.4,Solyc05g054960.4,Solyc05g006460.3,Solyc06g082880.2,Solyc12g014230.2,Solyc10g007180.2,	0.416295
Solyc10g077040.2	29394	38849	57897	3482	8158	12765	581.375	762.057	962.779	69.4806	159.029	262.003	9.02e-08	-4.16625	Biological process	mitochondrial RNA metabolic process	GO:0000959	8	0.0143076	1.6227	18	40	2995	10800	Solyc01g080190.3,Solyc07g047620.3,Solyc02g062910.3,Solyc12g099620.1,Solyc02g085650.4,Solyc09g092150.1,Solyc04g080120.1,Solyc01g100800.2,Solyc05g009253.1,Solyc04g009000.1,Solyc03g112420.3,Solyc11g068470.3,Solyc11g017370.3,Solyc01g094850.3,Solyc06g082880.2,Solyc01g049810.4,Solyc07g005930.4,Solyc12g011400.3,	0.428079
Solyc08g068100.3	1184	1068	1320	193	303	275	13.0352	11.6624	12.2113	2.13918	3.28682	3.13712	1.2e-29	-4.16611	Biological process	heme biosynthetic process	GO:0006783	8	0.0151852	2.02838	9	16	2995	10800	Solyc04g079320.4,Solyc04g076870.4,Solyc01g086650.3,Solyc01g080860.3,Solyc08g065480.3,Solyc06g048730.3,Solyc11g007000.2,Solyc01g079090.4,Solyc10g007320.3,	0.450315
Solyc03g116870.3	7389	6795	9862	503	1858	2303	128.684	117.368	144.404	8.83121	31.8978	41.6251	5.94e-07	-4.15014	Biological process	recognition of pollen	GO:0048544	4	0.0161225	1.37028	38	100	2995	10800	Solyc04g008370.3,Solyc03g005130.3,Solyc05g008310.4,Solyc03g078360.1,Solyc04g077330.4,Solyc07g063770.3,Solyc02g079700.1,Solyc04g077380.2,Solyc04g078410.4,Solyc04g077320.2,Solyc07g063710.2,Solyc02g079710.4,Solyc03g006770.4,Solyc04g077370.2,Solyc02g078750.3,Solyc11g005630.1,Solyc01g094830.4,Solyc04g077310.3,Solyc10g006710.4,Solyc09g075920.1,Solyc02g079590.3,Solyc02g079600.3,Solyc03g006730.3,Solyc04g…	0.473918
Solyc03g019890.3	1869	4445	6665	361	761	1279	16.792	39.6168	50.3552	3.26679	6.73711	11.92	3.92e-06	-4.14684	Biological process	glucose 6-phosphate metabolic process	GO:0051156	6	0.0168725	1.80301	12	24	2995	10800	Solyc05g010260.4,Solyc12g014380.3,Solyc04g081400.3,Solyc02g069620.4,Solyc02g093830.4,Solyc01g097460.3,Solyc05g015950.3,Solyc06g053200.3,Solyc07g045540.4,Solyc04g005160.3,Solyc01g010250.4,Solyc05g012110.4,	0.491651
Solyc06g068910.3	139	395	567	53	70	86	1.52685	4.29844	5.24194	0.581011	0.752033	0.978088	9.08e-07	-4.14016	Biological process	chloroplast relocation	GO:0009902	8	0.0169885	2.40401	6	9	2995	10800	Solyc11g010560.3,Solyc09g042710.3,Solyc02g086350.3,Solyc04g080040.3,Solyc10g006330.3,Solyc11g072710.3,	0.490762
Solyc04g077690.3	174	253	390	37	54	73	6.36372	9.18463	11.9901	1.35062	1.92222	2.74728	2.09e-09	-4.13928	Biological process	photosystem II assembly	GO:0010207	7	0.0169885	2.40401	6	9	2995	10800	Solyc02g090030.2,Solyc02g065400.3,Solyc07g054290.1,Solyc09g076030.4,Solyc07g054820.4,Solyc07g066310.3,	0.490762
Solyc09g082980.3	10097	7816	8215	951	2372	2190	133.256	102.308	91.1537	12.6547	30.8493	29.9893	1.82e-11	-4.13632	Biological process	plastid localization	GO:0051644	4	0.0169885	2.40401	6	9	2995	10800	Solyc11g010560.3,Solyc09g042710.3,Solyc02g086350.3,Solyc04g080040.3,Solyc10g006330.3,Solyc11g072710.3,	0.490762
Solyc06g071030.3	701	813	1071	69	189	255	10.9721	12.6167	14.0932	1.08288	2.91135	4.13468	8.02e-08	-4.13394	Biological process	establishment of plastid localization	GO:0051667	5	0.0169885	2.40401	6	9	2995	10800	Solyc11g010560.3,Solyc09g042710.3,Solyc02g086350.3,Solyc04g080040.3,Solyc10g006330.3,Solyc11g072710.3,	0.490762
Solyc08g061560.3	3940	5041	6770	404	1473	1290	27.973	35.4988	40.4149	2.889	10.307	9.50363	6.07e-08	-4.12447	Biological process	chloroplast localization	GO:0019750	5	0.0169885	2.40401	6	9	2995	10800	Solyc11g010560.3,Solyc09g042710.3,Solyc02g086350.3,Solyc04g080040.3,Solyc10g006330.3,Solyc11g072710.3,	0.490762
Solyc03g083100.3	5840	5557	7686	959	1797	1404	91.6309	86.4735	101.398	15.1801	27.7814	22.8539	2.76e-21	-4.11797	Biological process	non-membrane-bounded organelle assembly	GO:0140694	7	0.0174404	1.45317	27	67	2995	10800	Solyc03g120340.3,Solyc10g083600.2,Solyc02g082360.4,Solyc08g013990.3,Solyc02g068420.4,Solyc01g104470.3,Solyc02g067990.3,Solyc03g120080.4,Solyc04g016380.3,Solyc11g065670.1,Solyc12g005050.2,Solyc01g099670.3,Solyc01g096800.3,Solyc02g021400.2,Solyc06g072120.3,Solyc04g072260.3,Solyc02g086240.3,Solyc07g055230.4,Solyc10g083740.3,Solyc10g085480.2,Solyc02g093790.3,Solyc02g093800.3,Solyc10g078660.2,Solyc12g…	0.482997
Solyc09g010530.3	645	61	242	28	67	63	6.4178	0.600031	2.02081	0.274652	0.655357	0.646791	0.000649087	-4.11738	Biological process	cellulose metabolic process	GO:0030243	9	0.017464	1.4424	28	70	2995	10800	Solyc01g110340.4,Solyc08g082650.2,Solyc11g017460.3,Solyc03g113450.4,Solyc12g055970.3,Solyc08g082660.2,Solyc04g071650.4,Solyc05g005080.3,Solyc08g082670.4,Solyc08g083210.3,Solyc09g075550.3,Solyc11g005560.3,Solyc09g075360.4,Solyc02g065765.1,Solyc08g082250.3,Solyc07g051820.3,Solyc11g008820.2,Solyc12g014430.2,Solyc08g076320.3,Solyc04g054480.3,Solyc01g087210.3,Solyc11g040340.3,Solyc07g049300.3,Solyc12g…	0.479688
Solyc02g080810.3	10073	13032	22495	1726	3554	4054	176.1	225.955	330.664	30.4354	61.234	73.5438	7.24e-10	-4.11431	Biological process	sulfur compound metabolic process	GO:0006790	4	0.0186688	1.25106	68	196	2995	10800	Solyc12g099000.3,Solyc08g014340.3,Solyc01g107550.3,Solyc07g065340.1,Solyc08g080910.3,Solyc09g065640.3,Solyc09g065520.4,Solyc12g094430.1,Solyc03g119420.3,Solyc08g083110.4,Solyc09g011650.4,Solyc12g011320.2,Solyc01g101060.4,Solyc11g007020.2,Solyc09g074970.3,Solyc10g081510.2,Solyc05g006740.4,Solyc09g011590.4,Solyc05g044630.3,Solyc07g053150.3,Solyc05g024160.3,Solyc04g009530.4,Solyc04g009650.4,Solyc04g…	0.50861
Solyc04g079690.3	272	350	493	45	105	83	3.04504	3.88872	4.64126	0.504682	1.15791	0.956783	8.08e-11	-4.11172	Biological process	aromatic amino acid family biosynthetic process	GO:0009073	9	0.0188942	1.73623	13	27	2995	10800	Solyc04g051860.3,Solyc04g049350.4,Solyc12g035190.2,Solyc02g083590.3,Solyc01g091190.3,Solyc02g088460.4,Solyc04g074480.3,Solyc11g017240.3,Solyc05g050980.3,Solyc04g054710.3,Solyc06g071550.3,Solyc09g011870.3,Solyc11g009080.2,	0.5106
Solyc08g080050.4	12305	13787	20547	1337	4483	3732	257.789	286.459	361.927	28.2523	92.5773	81.1232	1.15e-08	-4.11144	Biological process	starch metabolic process	GO:0005982	8	0.0188942	1.73623	13	27	2995	10800	Solyc12g062250.2,Solyc10g078950.2,Solyc02g091530.4,Solyc01g079790.4,Solyc05g005020.4,Solyc03g083090.4,Solyc02g071020.3,Solyc02g020980.4,Solyc05g052600.4,Solyc08g083320.4,Solyc02g080570.3,Solyc11g007830.2,Solyc07g056140.3,	0.5106
Solyc09g075460.3	3477	3572	4087	497	827	1067	52.7598	53.7428	52.1372	7.59483	12.3676	16.7934	1.42e-15	-4.10992	Biological process	protein folding	GO:0006457	3	0.0194675	1.27666	57	161	2995	10800	Solyc07g047790.3,Solyc05g006820.4,Solyc05g053470.3,Solyc07g064930.3,Solyc07g055260.3,Solyc01g096520.3,Solyc07g008800.4,Solyc05g013990.3,Solyc11g065740.2,Solanum_lycopersicum_newGene_2411,Solyc01g103450.3,Solyc01g111170.3,Solyc08g062437.1,Solyc06g036290.3,Solyc12g015880.2,Solyc09g091180.3,Solyc11g069690.3,Solyc09g092260.4,Solyc06g011380.2,Solyc04g009770.3,Solyc01g108340.3,Solyc03g098440.4,Solyc11g…	0.517743
Solyc10g052540.1	69	60	65	4	23	9	6.95805	5.99981	5.51762	0.34785	2.26174	0.862224	6.5e-05	-4.10761	Biological process	maturation of LSU-rRNA	GO:0000470	11	0.019571	2.06058	8	14	2995	10800	Solyc07g047670.3,Solyc08g075090.4,Solyc10g083600.2,Solyc06g068400.3,Solyc07g008370.4,Solyc01g103720.4,Solyc02g088780.4,Solyc09g011420.3,	0.516398
Solyc02g089550.3	971	1327	1638	123	308	376	9.14751	12.4085	12.9791	1.16914	2.86075	3.67679	7.46e-09	-4.10062	Biological process	defense response to bacterium	GO:0042742	7	0.0196912	1.36649	36	95	2995	10800	Solyc02g068540.2,Solyc01g095670.4,Solyc08g080660.1,Solyc07g040690.3,Solyc11g017460.3,Solyc07g044980.3,Solyc08g080670.1,Solyc09g098160.3,Solyc01g097240.3,Solyc11g016930.1,Solyc03g033480.4,Solyc02g092560.3,Solyc10g079460.1,Solyc06g036420.3,Solyc03g118710.3,Solyc11g066020.2,Solyc09g005000.1,Solyc02g069180.4,Solyc01g097280.2,Solyc06g076050.4,Solyc03g118720.3,Solyc02g063355.1,Solyc05g053870.3,Solyc10g…	0.515508
Solyc02g077330.3	377	2564	5280	307	547	523	6.93518	46.8582	81.8077	5.69777	9.92694	9.99481	0.000255688	-4.10043	Biological process	serine family amino acid metabolic process	GO:0009069	9	0.0197046	1.55714	19	44	2995	10800	Solyc08g014340.3,Solyc03g112070.4,Solyc07g065340.1,Solyc06g061070.3,Solyc08g083110.4,Solyc08g065220.3,Solyc12g099930.2,Solyc10g012370.3,Solyc07g066580.3,Solyc09g082060.3,Solyc05g055000.4,Solyc02g091560.3,Solyc12g098490.2,Solyc05g053810.3,Solyc08g065490.3,Solyc08g007040.3,Solyc02g080810.3,Solyc06g076510.3,Solyc01g094790.3,	0.511862
Solyc03g119990.4	56	103	347	18	28	39	0.680847	1.24608	3.57009	0.220972	0.334596	0.484185	0.000214275	-4.09977	Biological process	response to temperature stimulus	GO:0009266	4	0.0202088	1.29713	50	139	2995	10800	Solyc10g081490.2,Solyc04g071940.3,Solyc11g012830.3,Solyc08g079170.3,Solyc07g040690.3,Solyc09g011650.4,Solyc04g054180.4,Solyc03g082420.3,Solyc08g062437.1,Solyc01g094520.3,Solyc12g015880.2,Solyc09g011590.4,Solyc05g005020.4,Solyc06g011380.2,Solyc04g009770.3,Solyc09g005120.3,Solyc09g011540.2,Solyc04g076400.3,Solyc02g088610.4,Solyc11g011210.2,Solyc03g096545.1,Solyc10g076700.2,Solyc06g011370.4,Solyc02g…	0.52092
Solyc03g033295.1	303	60	86	17	40	23	5.26406	1.03276	1.25601	0.281955	0.669538	0.398617	0.000338246	-4.0964	Biological process	protoporphyrinogen IX metabolic process	GO:0046501	7	0.0203799	2.57572	5	7	2995	10800	Solyc04g079320.4,Solyc04g076870.4,Solyc06g048730.3,Solyc01g079090.4,Solyc10g007320.3,	0.521321
Solyc03g093790.3	98	131	203	14	36	36	2.62742	3.49545	4.60142	0.360777	0.954869	1.00121	3.41e-07	-4.09635	Biological process	protoporphyrinogen IX biosynthetic process	GO:0006782	8	0.0203799	2.57572	5	7	2995	10800	Solyc04g079320.4,Solyc04g076870.4,Solyc06g048730.3,Solyc01g079090.4,Solyc10g007320.3,	0.521321
Solyc10g005100.3	13708	9799	9371	1471	3167	2551	336.546	238.599	193.427	36.4253	76.6218	64.993	6.99e-13	-4.08815	Biological process	tricarboxylic acid metabolic process	GO:0072350	7	0.0203799	2.57572	5	7	2995	10800	Solyc01g005560.3,Solyc11g011930.3,Solyc01g100490.4,Solyc02g086610.4,Solyc01g073740.4,	0.521321
Solyc11g069430.2	20181	20086	23031	2283	5650	5651	442.31	436.595	424.388	50.4835	122.044	128.523	8.71e-12	-4.08514	Biological process	generation of precursor metabolites and energy	GO:0006091	4	0.0216984	1.1781	115	352	2995	10800	Solyc08g080050.4,Solyc01g111120.4,Solyc01g005560.3,Solyc06g083790.3,Solyc05g010260.4,Solyc00g500206.1,Solyc09g007390.3,Solyc06g069730.3,Solyc05g056050.3,Solyc01g095670.4,Solyc09g009260.3,Solyc02g070980.1,Solyc07g066610.3,Solyc01g007910.3,Solyc12g014380.3,Solyc07g063600.3,Solyc10g007690.3,Solyc04g005180.4,Solyc08g067320.3,Solyc02g071030.2,Solyc03g115990.3,Solyc07g064800.3,Solyc09g075450.3,Solyc12g…	0.491292
Solyc04g054190.3	6623	8452	12271	1238	2527	2127	59.6523	75.499	92.9233	11.25	22.4275	19.8756	4.66e-14	-4.08278	Biological process	cell recognition	GO:0008037	3	0.0224904	1.34342	38	102	2995	10800	Solyc04g008370.3,Solyc03g005130.3,Solyc05g008310.4,Solyc03g078360.1,Solyc04g077330.4,Solyc07g063770.3,Solyc02g079700.1,Solyc04g077380.2,Solyc04g078410.4,Solyc04g077320.2,Solyc07g063710.2,Solyc02g079710.4,Solyc03g006770.4,Solyc04g077370.2,Solyc02g078750.3,Solyc11g005630.1,Solyc01g094830.4,Solyc04g077310.3,Solyc10g006710.4,Solyc09g075920.1,Solyc02g079590.3,Solyc02g079600.3,Solyc03g006730.3,Solyc04g…	0.505807
Solyc06g066420.4	529	344	396	20	64	149	20.2828	13.0762	12.7515	0.75842	2.39841	5.92744	9.65e-05	-4.07115	Biological process	protein transmembrane import into intracellular organelle	GO:0044743	9	0.0244136	1.73088	12	25	2995	10800	Solyc08g077440.3,Solyc06g007710.4,Solyc10g006020.3,Solyc02g087400.1,Solyc06g082793.1,Solyc01g098230.3,Solyc05g047390.1,Solyc06g068820.3,Solyc01g060070.3,Solyc06g007700.4,Solyc04g008770.3,Solyc07g015970.3,	0.514528
Solyc02g078450.3	3143	2199	1997	204	699	632	72.3895	50.2345	38.6563	4.73557	15.8614	15.1059	1.86e-07	-4.06751	Biological process	starch biosynthetic process	GO:0019252	9	0.0244453	1.90906	9	17	2995	10800	Solyc10g078950.2,Solyc02g091530.4,Solyc01g079790.4,Solyc03g083090.4,Solyc02g071020.3,Solyc05g052600.4,Solyc08g083320.4,Solyc02g080570.3,Solyc07g056140.3,	0.511977
Solanum_lycopersicum_newGene_2192	109	83	72	8	14	29	1.6665	1.51235	1.05962	0.112054	0.198892	0.442846	1.89e-05	-4.06629	Biological process	base conversion or substitution editing	GO:0016553	9	0.0252513	2.10351	7	12	2995	10800	Solyc02g079210.3,Solyc01g066060.4,Solyc05g054960.4,Solyc05g006460.3,Solyc06g082880.2,Solyc12g014230.2,Solyc10g007180.2,	0.525572
Solyc01g108900.4	211	164	257	9	36	70	2.49266	1.92016	2.55607	0.107315	0.409075	0.848215	0.000110677	-4.06409	Biological process	tetraterpenoid biosynthetic process	GO:0016109	9	0.0252513	2.10351	7	12	2995	10800	Solyc11g011990.2,Solyc12g041880.2,Solyc02g081330.4,Solyc04g051190.3,Solyc03g123760.3,Solyc10g083790.3,Solyc12g008980.3,	0.525572
Solyc03g083050.3	326	291	239	47	64	77	9.35884	8.28619	5.7819	1.3566	1.81405	2.2924	1.46e-13	-4.06325	Biological process	carotenoid biosynthetic process	GO:0016117	10	0.0252513	2.10351	7	12	2995	10800	Solyc11g011990.2,Solyc12g041880.2,Solyc02g081330.4,Solyc04g051190.3,Solyc03g123760.3,Solyc10g083790.3,Solyc12g008980.3,	0.525572
Solyc05g053850.3	615	415	635	84	153	131	17.8234	11.9259	15.4716	2.45657	4.36067	3.92414	2.13e-14	-4.05207	Biological process	organophosphate metabolic process	GO:0019637	5	0.0254087	1.14951	146	458	2995	10800	Solyc01g111120.4,Solyc12g055740.2,Solyc05g010260.4,Solyc03g120090.1,Solyc09g007390.3,Solyc12g096660.3,Solyc05g055760.3,Solyc06g054010.3,Solyc12g095880.2,Solyc06g066000.3,Solyc07g049280.3,Solyc09g009260.3,Solyc04g054740.3,Solyc07g066610.3,Solyc07g066480.3,Solyc12g014380.3,Solyc06g060770.3,Solyc10g024410.2,Solyc05g005250.3,Solyc11g017400.2,Solyc04g039650.4,Solyc11g011200.2,Solyc01g109300.3,Solyc08g…	0.519175
Solyc04g077140.3	109	226	298	16	43	62	1.61295	3.31692	3.70782	0.229273	0.613631	0.942277	1.77e-05	-4.05038	Biological process	organic acid catabolic process	GO:0016054	5	0.0264755	1.45506	23	57	2995	10800	Solyc05g056170.3,Solyc10g008110.4,Solyc02g022930.3,Solyc02g089630.3,Solyc06g061070.3,Solyc08g078390.4,Solyc04g005200.4,Solyc04g005190.2,Solyc08g065220.3,Solyc02g086880.4,Solyc12g094450.3,Solyc07g056670.3,Solyc09g007890.1,Solyc01g107700.4,Solyc09g007920.4,Solyc04g054890.3,Solyc10g054440.3,Solyc07g061720.3,Solyc07g061730.3,Solyc03g098240.3,Solyc08g007040.3,Solyc10g049970.2,Solyc02g080810.3,	0.537693
Solyc10g008160.3	232	357	180	40	58	67	5.61356	8.58244	3.66494	0.961876	1.37931	1.68606	3.15e-09	-4.04556	Biological process	carbohydrate metabolic process	GO:0005975	4	0.0286447	1.10007	277	908	2995	10800	Solyc01g111120.4,Solyc01g110340.4,Solyc03g114730.3,Solyc05g010260.4,Solyc10g055810.2,Solyc02g072470.4,Solyc12g062250.2,Solyc03g019890.3,Solyc09g098590.4,Solyc08g006907.1,Solyc12g038670.2,Solyc12g008530.2,Solyc03g007290.4,Solyc09g092160.2,Solyc08g081930.3,Solyc03g071570.3,Solyc12g100120.2,Solyc03g031800.3,Solyc02g087770.3,Solyc04g009030.3,Solyc12g096610.2,Solyc03g113030.4,Solyc09g009260.3,Solyc04g…	0.578244
Solyc07g064160.3	140572	93480	233046	9356	47510	35717	2404.39	1585.71	3351.28	161.457	800.968	633.965	9.49e-06	-4.03997	Biological process	protein transmembrane transport	GO:0071806	8	0.0295241	1.59089	15	34	2995	10800	Solyc08g077440.3,Solyc12g009980.2,Solyc06g007710.4,Solyc10g006020.3,Solyc03g025310.3,Solyc02g087400.1,Solyc06g082793.1,Solyc01g098230.3,Solyc05g047390.1,Solyc09g013100.3,Solyc06g068820.3,Solyc01g060070.3,Solyc06g007700.4,Solyc04g008770.3,Solyc07g015970.3,	0.592427
Solyc03g005020.3	127	142	292	29	41	47	2.25794	2.50569	4.36051	0.50559	0.704804	0.862512	2.91e-08	-4.02631	Biological process	metabolic process	GO:0008152	2	0.0314242	1.02015	2070	7317	2995	10800	Solyc06g084570.4,Solyc08g080050.4,Solyc05g025810.3,Solyc10g011820.4,Solyc05g056170.3,Solyc01g111120.4,Solyc09g065330.3,Solyc04g071140.3,Solyc07g056350.3,Solyc12g055740.2,Solyc06g083180.4,Solyc12g099000.3,Solyc06g062520.1,Solyc01g094960.3,Solyc10g055680.1,Solyc01g005560.3,Solyc01g110340.4,Solyc06g083790.3,Solyc03g114730.3,Solyc05g010260.4,Solyc02g085360.4,Solyc01g090510.2,Solyc05g012920.3,Solyc01g…
Solyc01g105020.3	5514	6686	8499	998	1759	1861	42.3359	50.9114	54.8624	7.72701	13.3063	14.8279	1.37e-16	-4.02393	07g066310.3,Solyc09g092360.3,Solyc05g009220.3,Solyc10g074500.2,Solyc11g011120.2,Solyc10g049970.2,Solyc02g021060.4,Solyc08g006740.3,Solyc06g034150.4,Solyc12g006540.2,Solyc02g070330.4,Solyc09g007560.4,Solyc02g080200.4,Solyc04g081300.4,Solyc09g065780.3,Solyc12g070100.2,Solyc11g006320.2,Solyc09g074680.3,Solyc02g081340.3,Solyc04g072390.3,Solyc03g113370.3,Solyc06g064600.1,Solyc01g067120.4,Solyc02g08032…	0.6268
Solyc05g052820.3	315	271	357	39	75	92	5.66866	4.83293	5.40161	0.700925	1.32971	1.70467	7.47e-11	-4.02163	Biological process	hexose transmembrane transport	GO:0008645	9	0.0319012	1.92321	8	15	2995	10800	Solyc03g078000.3,Solyc09g075820.3,Solyc02g079220.4,Solyc03g096950.4,Solyc03g032040.3,Solyc11g012450.2,Solyc01g109460.3,Solyc02g086160.4,	0.632549
Solyc09g065910.3	10397	12016	18335	1636	3345	3869	1345.82	1542.49	1995.39	213.65	426.687	519.706	5.57e-11	-4.01795	Biological process	carbohydrate transmembrane transport	GO:0034219	7	0.0319012	1.92321	8	15	2995	10800	Solyc03g078000.3,Solyc09g075820.3,Solyc02g079220.4,Solyc03g096950.4,Solyc03g032040.3,Solyc11g012450.2,Solyc01g109460.3,Solyc02g086160.4,	0.632549
Solyc03g115020.3	8443	8083	9819	1219	2650	2089	236.337	224.39	231.08	34.4151	73.0951	60.6582	2.45e-16	-4.01707	Biological process	glucose transmembrane transport	GO:1904659	10	0.0319012	1.92321	8	15	2995	10800	Solyc03g078000.3,Solyc09g075820.3,Solyc02g079220.4,Solyc03g096950.4,Solyc03g032040.3,Solyc11g012450.2,Solyc01g109460.3,Solyc02g086160.4,	0.632549
Solyc08g080190.4	1186	2131	3085	367	502	521	15.0013	26.7394	32.8135	4.6739	6.25868	6.84035	7.1e-12	-4.01665	Biological process	glucose import	GO:0046323	11	0.0319012	1.92321	8	15	2995	10800	Solyc03g078000.3,Solyc09g075820.3,Solyc02g079220.4,Solyc03g096950.4,Solyc03g032040.3,Solyc11g012450.2,Solyc01g109460.3,Solyc02g086160.4,	0.632549
Solyc09g092110.4	39564	19626	13685	904	4153	8358	2548.71	1253.87	741.186	58.7284	263.687	558.743	0.000384917	-4.00388	Biological process	monosaccharide transmembrane transport	GO:0015749	8	0.0319012	1.92321	8	15	2995	10800	Solyc03g078000.3,Solyc09g075820.3,Solyc02g079220.4,Solyc03g096950.4,Solyc03g032040.3,Solyc11g012450.2,Solyc01g109460.3,Solyc02g086160.4,	0.632549
Solyc05g150152.1	817	879	769	57	224	236	31.187	33.2904	24.6649	2.17157	8.4135	9.34642	1.3e-06	-4.00267	Biological process	auxin-activated signaling pathway	GO:0009734	7	0.0320544	1.32466	36	98	2995	10800	Solyc06g053840.3,Solyc09g083290.3,Solyc05g008060.4,Solyc01g097290.4,Solyc07g042260.4,Solyc03g120390.3,Solyc09g090910.3,Solyc06g082090.4,Solyc02g091650.4,Solyc08g021820.3,Solyc10g078370.2,Solyc02g063450.4,Solyc03g120500.4,Solyc05g056040.3,Solyc03g118290.3,Solyc11g069190.2,Solyc06g007200.4,Solyc12g056995.2,Solyc11g069500.2,Solyc12g005310.2,Solyc08g008380.4,Solyc04g007690.3,Solyc06g066020.3,Solyc10g…	0.617324
Solyc01g087750.4	2661	4043	6378	827	905	1140	52.8601	79.6369	106.513	16.5762	17.7171	23.4825	3.56e-13	-4.00006	Biological process	organic hydroxy compound biosynthetic process	GO:1901617	5	0.0324912	1.41876	24	61	2995	10800	Solyc02g085360.4,Solyc03g120090.1,Solyc04g071940.3,Solyc04g054740.3,Solyc03g094175.1,Solyc07g056160.4,Solyc03g094177.1,Solyc02g069010.4,Solyc11g007020.2,Solyc04g077440.4,Solyc04g009650.4,Solyc06g076410.4,Solyc08g077880.3,Solyc06g006080.3,Solyc08g007180.3,Solyc07g064160.3,Solyc04g071960.3,Solyc02g090890.4,Solyc03g118000.1,Solyc02g005520.2,Solyc03g113780.3,Solyc11g069290.2,Solyc01g098840.3,Solyc02g…	0.622161
Solyc09g065480.2	967	1195	729	67	221	309	14.8084	18.15	9.37896	1.03526	3.33544	4.91148	5.65e-06	-3.99398	Biological process	maturation of LSU-rRNA from tricistronic rRNA transcript (SSU-rRNA, 5.8S rRNA, LSU-rRNA)	GO:0000463	12	0.032595	2.16361	6	10	2995	10800	Solyc07g047670.3,Solyc08g075090.4,Solyc06g068400.3,Solyc07g008370.4,Solyc01g103720.4,Solyc02g088780.4,	0.620601
Solyc07g006320.4	265	199	244	46	58	58	5.13701	3.82659	3.98209	0.886491	1.10825	1.16574	3.96e-17	-3.9898	Biological process	regulation of response to water deprivation	GO:2000070	6	0.032595	2.16361	6	10	2995	10800	Solyc10g081490.2,Solyc05g006740.4,Solyc12g010900.1,Solyc05g053870.3,Solyc05g015390.3,Solyc01g099680.3,	0.620601
Solyc02g079190.3	6407	7305	6688	736	1559	2189	66.0349	74.667	57.9506	7.65086	15.8345	23.406	1.49e-09	-3.98648	Biological process	detection of light stimulus	GO:0009583	6	0.032595	2.16361	6	10	2995	10800	Solyc05g053410.4,Solyc01g059870.4,Solyc02g071260.3,Solyc07g047950.1,Solyc07g045480.3,Solyc12g070100.2,	0.620601
Solyc01g111160.3	10589	10995	23700	2736	3591	3679	481.772	496.104	906.584	125.594	161.017	173.706	1.15e-12	-3.98573	Biological process	red, far-red light phototransduction	GO:0009585	8	0.032595	2.16361	6	10	2995	10800	Solyc05g053410.4,Solyc01g059870.4,Solyc02g071260.3,Solyc07g047950.1,Solyc07g045480.3,Solyc12g070100.2,	0.620601
Solyc03g093560.1	2606	413	2128	348	307	371	97.7234	15.3587	67.0994	13.1657	11.324	14.4309	3.57e-05	-3.98195	Biological process	regulation of lipid biosynthetic process	GO:0046890	7	0.032595	2.16361	6	10	2995	10800	Solyc04g071940.3,Solyc09g092260.4,Solyc08g077880.3,Solyc08g007180.3,Solyc04g071960.3,Solyc12g087990.3,	0.620601
Solyc07g056360.1	74	112	159	4	19	38	6.44526	9.69537	11.6887	0.3262	1.62834	3.40156	0.000524751	-3.98116	Biological process	phototransduction	GO:0007602	7	0.032595	2.16361	6	10	2995	10800	Solyc05g053410.4,Solyc01g059870.4,Solyc02g071260.3,Solyc07g047950.1,Solyc07g045480.3,Solyc12g070100.2,	0.620601
Solanum_lycopersicum_newGene_2191	150	206	80	18	29	43	5.61048	7.62783	2.51061	0.641738	1.03299	1.6606	1.01e-05	-3.98034	Biological process	serine family amino acid biosynthetic process	GO:0009070	10	0.0341518	1.66431	12	26	2995	10800	Solyc08g014340.3,Solyc03g112070.4,Solyc07g065340.1,Solyc12g099930.2,Solyc10g012370.3,Solyc09g082060.3,Solyc02g091560.3,Solyc12g098490.2,Solyc05g053810.3,Solyc08g065490.3,Solyc06g076510.3,Solyc01g094790.3,	0.628805
Solyc05g005000.4	766	1040	859	210	203	209	10.5148	14.1618	9.91136	2.90479	2.7392	2.97242	9.41e-32	-3.9773	Biological process	NADP metabolic process	GO:0006739	11	0.0341518	1.66431	12	26	2995	10800	Solyc05g010260.4,Solyc01g008560.3,Solyc02g069620.4,Solyc02g093830.4,Solyc01g097460.3,Solyc05g015950.3,Solyc06g053200.3,Solyc07g045540.4,Solyc04g005160.3,Solyc01g010250.4,Solyc05g012110.4,Solyc06g060060.4,	0.628805
Solyc11g073130.2	2838	3081	3576	384	876	886	92.0512	99.1088	97.5046	12.5429	28	29.8128	3.55e-12	-3.96998	Biological process	heme metabolic process	GO:0042168	7	0.037093	1.80301	9	18	2995	10800	Solyc04g079320.4,Solyc04g076870.4,Solyc01g086650.3,Solyc01g080860.3,Solyc08g065480.3,Solyc06g048730.3,Solyc11g007000.2,Solyc01g079090.4,Solyc10g007320.3,	0.675537
Solyc08g082400.1	3712	3987	4637	704	989	1171	135.907	144.757	142.73	26.0071	35.6715	44.46	1.34e-23	-3.96576	Biological process	RNA methylation	GO:0001510	9	0.037093	1.80301	9	18	2995	10800	Solyc12g088810.3,Solyc10g046930.3,Solyc06g008700.3,Solyc09g014320.4,Solyc06g072250.3,Solyc04g081360.3,Solyc11g020820.2,Solyc01g107040.3,Solyc11g020810.2,	0.675537
Solyc12g042170.3	214	216	411	37	97	48	8.1389	8.15381	13.1281	1.41463	3.60655	1.88196	1.32e-07	-3.96485	Biological process	intracellular protein transmembrane transport	GO:0065002	9	0.0376313	1.57763	14	32	2995	10800	Solyc08g077440.3,Solyc12g009980.2,Solyc06g007710.4,Solyc10g006020.3,Solyc02g087400.1,Solyc06g082793.1,Solyc01g098230.3,Solyc05g047390.1,Solyc09g013100.3,Solyc06g068820.3,Solyc01g060070.3,Solyc06g007700.4,Solyc04g008770.3,Solyc07g015970.3,	0.677971
Solyc10g005050.3	21919	23420	42130	2303	7766	8418	583.33	618.152	942.668	61.8253	203.703	232.484	8.58e-07	-3.96089	Biological process	organelle assembly	GO:0070925	6	0.0407748	1.32635	32	87	2995	10800	Solyc03g120340.3,Solyc11g068690.2,Solyc10g083600.2,Solyc02g082360.4,Solyc08g013990.3,Solyc02g068420.4,Solyc01g104470.3,Solyc02g067990.3,Solyc03g120080.4,Solyc04g016380.3,Solyc11g065670.1,Solyc02g081140.3,Solyc06g048510.4,Solyc09g066290.3,Solyc12g005050.2,Solyc01g099670.3,Solyc01g096800.3,Solyc02g021400.2,Solyc06g072120.3,Solyc04g072260.3,Solyc02g086240.3,Solyc07g055230.4,Solyc10g083740.3,Solyc10g…	0.730676
Solyc10g055630.2	2178	3627	4547	287	851	1051	51.3146	84.7482	90.0819	6.81549	19.7642	25.6893	7.84e-07	-3.95846	Biological process	pentose-phosphate shunt	GO:0006098	13	0.0410821	1.71715	10	21	2995	10800	Solyc05g010260.4,Solyc02g069620.4,Solyc02g093830.4,Solyc01g097460.3,Solyc05g015950.3,Solyc06g053200.3,Solyc07g045540.4,Solyc04g005160.3,Solyc01g010250.4,Solyc05g012110.4,	0.732267
Solyc06g070900.3	452	413	537	44	87	166	8.02443	7.26914	8.01303	0.783632	1.50896	3.05692	8.34e-07	-3.95823	Biological process	NADPH regeneration	GO:0006740	12	0.0410821	1.71715	10	21	2995	10800	Solyc05g010260.4,Solyc02g069620.4,Solyc02g093830.4,Solyc01g097460.3,Solyc05g015950.3,Solyc06g053200.3,Solyc07g045540.4,Solyc04g005160.3,Solyc01g010250.4,Solyc05g012110.4,	0.732267
Solyc05g014000.4	1923	3103	3832	324	663	935	34.8589	55.7806	58.3905	5.91556	11.8354	17.5884	2.5e-08	-3.95502	Biological process	cellular response to heat	GO:0034605	6	0.0418255	1.9417	7	13	2995	10800	Solyc08g079170.3,Solyc04g054180.4,Solyc12g015880.2,Solyc09g005120.3,Solyc06g084420.1,Solyc03g083970.3,Solyc09g074260.1,	0.73767
Solyc03g071570.3	151	427	924	78	83	130	2.1395	5.99619	11.0079	1.10563	1.15826	1.90507	4.7e-05	-3.95134	Biological process	tRNA wobble uridine modification	GO:0002098	13	0.0418255	1.9417	7	13	2995	10800	Solyc10g080110.3,Solyc07g064850.3,Solyc02g086100.4,Solyc05g054630.4,Solyc11g010950.2,Solyc04g072390.3,Solyc03g110910.4,	0.73767
Solyc04g079040.4	2847	2822	3619	547	1089	520	53.4363	52.5162	57.1006	10.3452	20.1383	10.124	2.44e-14	-3.95125	Biological process	fructose 6-phosphate metabolic process	GO:0006002	6	0.0418255	1.9417	7	13	2995	10800	Solyc12g095880.2,Solyc07g049280.3,Solyc03g093520.3,Solyc07g045160.3,Solyc11g010450.2,Solyc04g014270.3,Solyc05g052600.4,	0.73767
Solyc12g099540.2	596	783	1114	148	187	232	5.79809	7.55425	9.10499	1.44905	1.78388	2.34185	6.32e-15	-3.95039	Biological process	tetraterpenoid metabolic process	GO:0016108	8	0.0418255	1.9417	7	13	2995	10800	Solyc11g011990.2,Solyc12g041880.2,Solyc02g081330.4,Solyc04g051190.3,Solyc03g123760.3,Solyc10g083790.3,Solyc12g008980.3,	0.73767
Solyc02g081470.4	178	108	107	19	36	32	3.84486	2.31193	1.93429	0.395758	0.764627	0.707701	1.36e-07	-3.95003	Biological process	carotenoid metabolic process	GO:0016116	9	0.0418255	1.9417	7	13	2995	10800	Solyc11g011990.2,Solyc12g041880.2,Solyc02g081330.4,Solyc04g051190.3,Solyc03g123760.3,Solyc10g083790.3,Solyc12g008980.3,	0.73767
Solyc01g100210.3	171	226	118	32	30	51	3.44586	4.5183	2.00291	0.642682	0.58714	1.06041	8.99e-08	-3.94831	Biological process	photosynthetic electron transport in photosystem I	GO:0009773	7	0.0420215	2.25376	5	8	2995	10800	Solyc08g080050.4,Solyc05g026570.3,Solyc09g090570.2,Solyc12g036170.2,Solyc03g116870.3,	0.722123
Solyc09g010630.3	188391	182549	120494	43120	36836	35732	2207.54	2121.44	1187.07	509.836	425.439	434.498	5.18e-18	-3.9428	Biological process	regulation of isoprenoid metabolic process	GO:0019747	7	0.0420215	2.25376	5	8	2995	10800	Solyc04g071940.3,Solyc09g092260.4,Solyc08g077880.3,Solyc08g007180.3,Solyc04g071960.3,	0.722123
Solyc10g079230.3	38	72	199	5	13	32	0.623911	1.16697	2.76298	0.072387	0.201104	0.54864	0.00180566	-3.94164	Biological process	glycine biosynthetic process	GO:0006545	11	0.0420215	2.25376	5	8	2995	10800	Solyc12g099930.2,Solyc02g091560.3,Solyc12g098490.2,Solyc05g053810.3,Solyc08g065490.3,	0.722123
Solyc09g014970.4	7	319	395	22	30	46	0.17596	8.26245	8.68614	0.571925	0.756889	1.24306	0.00576942	-3.93909	Biological process	monocarboxylic acid catabolic process	GO:0072329	8	0.0420215	2.25376	5	8	2995	10800	Solyc10g008110.4,Solyc08g078390.4,Solyc02g086880.4,Solyc12g094450.3,Solyc04g054890.3,	0.722123
Solyc04g050050.3	811	833	873	188	213	203	12.499	12.7296	11.3117	2.91277	3.23203	3.24117	1.23e-58	-3.93668	Biological process	beta-glucan catabolic process	GO:0051275	9	0.0441053	1.65275	11	24	2995	10800	Solyc01g110340.4,Solyc12g055970.3,Solyc05g005080.3,Solyc08g083210.3,Solyc09g075360.4,Solyc08g082250.3,Solyc11g008820.2,Solyc11g040340.3,Solyc07g049300.3,Solyc07g049290.3,Solyc04g081300.4,	0.742698
Solanum_lycopersicum_newGene_1633	62	140	60	19	13	22	0.345731	0.772741	0.277821	0.102092	0.07167	0.122147	2.02e-05	-3.93501	Biological process	cellulose catabolic process	GO:0030245	10	0.0441053	1.65275	11	24	2995	10800	Solyc01g110340.4,Solyc12g055970.3,Solyc05g005080.3,Solyc08g083210.3,Solyc09g075360.4,Solyc08g082250.3,Solyc11g008820.2,Solyc11g040340.3,Solyc07g049300.3,Solyc07g049290.3,Solyc04g081300.4,	0.742698
Solyc02g030130.4	163	233	420	26	69	76	2.0213	2.86566	4.38513	0.314177	0.8416	0.976492	3.85e-06	-3.93063	Biological process	hexose metabolic process	GO:0019318	6	0.0453059	1.3043	34	94	2995	10800	Solyc03g114730.3,Solyc02g072470.4,Solyc12g038670.2,Solyc02g087770.3,Solyc04g009030.3,Solyc03g113030.4,Solyc12g014380.3,Solyc06g063240.3,Solyc06g071920.4,Solyc11g010600.2,Solyc02g093830.4,Solyc02g069240.1,Solyc08g078540.3,Solyc02g020940.3,Solyc04g045470.4,Solyc02g072480.4,Solyc10g045420.3,Solyc01g086640.2,Solyc06g069380.4,Solyc04g076100.4,Solyc04g082630.3,Solyc05g015950.3,Solyc07g043550.3,Solyc02g…	0.755323
Solyc10g018645.1	170	51	65	4	27	21	2.19557	0.64757	0.70824	0.047679	0.333866	0.277775	0.00129876	-3.92866	Biological process	glucosamine-containing compound catabolic process	GO:1901072	7	0.0463578	1.60267	12	27	2995	10800	Solyc10g055810.2,Solyc01g095670.4,Solyc10g055820.3,Solyc02g061770.4,Solyc04g072000.4,Solyc09g098540.3,Solyc09g042770.4,Solyc10g055780.1,Solyc12g098810.2,Solyc02g082930.3,Solyc02g082920.4,Solyc10g055800.2,	0.769035
Solyc07g049690.3	11834	14250	17422	2203	4059	3913	167.154	199.62	206.891	31.3923	56.5021	57.3491	4.87e-17	-3.92467	Biological process	glucosamine-containing compound metabolic process	GO:1901071	6	0.0463578	1.60267	12	27	2995	10800	Solyc10g055810.2,Solyc01g095670.4,Solyc10g055820.3,Solyc02g061770.4,Solyc04g072000.4,Solyc09g098540.3,Solyc09g042770.4,Solyc10g055780.1,Solyc12g098810.2,Solyc02g082930.3,Solyc02g082920.4,Solyc10g055800.2,	0.769035
Solyc06g076630.3	433	1047	1360	142	254	226	9.97063	23.9404	26.3777	3.30068	5.75826	5.40473	5.23e-08	-3.92421	Biological process	amino sugar catabolic process	GO:0046348	6	0.0463578	1.60267	12	27	2995	10800	Solyc10g055810.2,Solyc01g095670.4,Solyc10g055820.3,Solyc02g061770.4,Solyc04g072000.4,Solyc09g098540.3,Solyc09g042770.4,Solyc10g055780.1,Solyc12g098810.2,Solyc02g082930.3,Solyc02g082920.4,Solyc10g055800.2,	0.769035
Solyc10g045240.2	974	781	819	138	175	280	15.5176	12.3417	10.9657	2.20485	2.7482	4.61927	6.68e-12	-3.92307	Biological process	aminoglycan metabolic process	GO:0006022	5	0.0463578	1.60267	12	27	2995	10800	Solyc10g055810.2,Solyc01g095670.4,Solyc10g055820.3,Solyc02g061770.4,Solyc04g072000.4,Solyc09g098540.3,Solyc09g042770.4,Solyc10g055780.1,Solyc12g098810.2,Solyc02g082930.3,Solyc02g082920.4,Solyc10g055800.2,	0.769035
Solyc10g051110.1	13381	13398	17368	1825	4225	4158	142.119	141.123	155.088	19.5546	44.228	45.8219	8.14e-12	-3.91388	Biological process	aminoglycan catabolic process	GO:0006026	6	0.0463578	1.60267	12	27	2995	10800	Solyc10g055810.2,Solyc01g095670.4,Solyc10g055820.3,Solyc02g061770.4,Solyc04g072000.4,Solyc09g098540.3,Solyc09g042770.4,Solyc10g055780.1,Solyc12g098810.2,Solyc02g082930.3,Solyc02g082920.4,Solyc10g055800.2,	0.769035
Solyc11g005150.3	106	224	504	43	60	67	1.56648	3.28156	6.27229	0.633207	0.87365	1.02278	2e-05	-3.90771	Biological process	chitin metabolic process	GO:0006030	7	0.0463578	1.60267	12	27	2995	10800	Solyc10g055810.2,Solyc01g095670.4,Solyc10g055820.3,Solyc02g061770.4,Solyc04g072000.4,Solyc09g098540.3,Solyc09g042770.4,Solyc10g055780.1,Solyc12g098810.2,Solyc02g082930.3,Solyc02g082920.4,Solyc10g055800.2,	0.769035
Solyc12g055840.2	3564	4564	6202	472	1212	1498	55.1612	70.0601	80.7166	7.36693	18.4801	24.0592	5.28e-08	-3.90692	Biological process	chitin catabolic process	GO:0006032	8	0.0463578	1.60267	12	27	2995	10800	Solyc10g055810.2,Solyc01g095670.4,Solyc10g055820.3,Solyc02g061770.4,Solyc04g072000.4,Solyc09g098540.3,Solyc09g042770.4,Solyc10g055780.1,Solyc12g098810.2,Solyc02g082930.3,Solyc02g082920.4,Solyc10g055800.2,	0.769035
Solyc06g052010.2	517	995	1060	129	212	244	9.93365	18.9735	17.1448	2.50177	4.01943	4.8625	2.2e-10	-3.90543	Biological process	terpenoid metabolic process	GO:0006721	7	0.0474607	1.37372	24	63	2995	10800	Solyc03g006880.3,Solyc11g010850.2,Solyc04g071940.3,Solyc07g042630.4,Solyc11g011990.2,Solyc12g041880.2,Solyc01g067890.4,Solyc02g081330.4,Solyc07g052150.4,Solyc04g051190.3,Solyc07g056670.3,Solyc03g123760.3,Solyc08g077880.3,Solyc10g083790.3,Solyc04g077860.4,Solyc04g070980.4,Solyc12g008980.3,Solyc12g006520.2,Solyc08g007180.3,Solyc04g071960.3,Solyc02g090890.4,Solyc07g061720.3,Solyc07g052120.4,Solyc07g…	0.760961
Solyc08g083220.1	91	122	165	25	39	22	3.27138	4.3814	5.02187	0.911246	1.37161	0.797185	2.55e-09	-3.90012	Biological process	organic substance metabolic process	GO:0071704	3	0.0479606	1.02109	1855	6551	2995	10800	Solyc10g011820.4,Solyc05g056170.3,Solyc01g111120.4,Solyc09g065330.3,Solyc04g071140.3,Solyc07g056350.3,Solyc12g055740.2,Solyc06g083180.4,Solyc12g099000.3,Solyc06g062520.1,Solyc01g094960.3,Solyc10g055680.1,Solyc01g005560.3,Solyc01g110340.4,Solyc03g114730.3,Solyc05g010260.4,Solyc02g085360.4,Solyc01g090510.2,Solyc05g012920.3,Solyc01g091160.4,Solyc10g055810.2,Solyc03g025630.3,Solyc03g120090.1,Solyc02g…	0.765314
Solyc08g076220.3	56268	63670	89621	6771	20266	20102	863.825	969.394	1156.74	104.882	306.659	320.238	2.79e-08	-3.89991	Biological process	cellular metabolic process	GO:0044237	3	0.0484322	1.02307	1721	6066	2995	10800	Solyc08g080050.4,Solyc05g056170.3,Solyc01g111120.4,Solyc09g065330.3,Solyc04g071140.3,Solyc12g055740.2,Solyc06g083180.4,Solyc12g099000.3,Solyc06g062520.1,Solyc01g005560.3,Solyc01g110340.4,Solyc06g083790.3,Solyc05g010260.4,Solyc01g090510.2,Solyc05g012920.3,Solyc01g091160.4,Solyc10g055810.2,Solyc03g025630.3,Solyc03g120090.1,Solyc10g054420.2,Solyc06g071810.1,Solyc07g047670.3,Solyc00g500206.1,Solyc08g…	0.769177
Solyc07g049300.3	110	248	448	35	48	81	1.60851	3.59084	5.50021	0.503291	0.689343	1.22435	2.74e-05	-3.89755	Biological process	steroid biosynthetic process	GO:0006694	6	0.0491385	1.52982	14	33	2995	10800	Solyc10g055680.1,Solyc02g085360.4,Solyc07g056160.4,Solyc11g007020.2,Solyc04g077440.4,Solyc10g080150.2,Solyc04g009650.4,Solyc06g076410.4,Solyc01g111830.3,Solyc10g080160.2,Solyc01g087560.3,Solyc04g082750.3,Solyc02g086770.3,Solyc01g098840.3,	0.776713
Solyc06g066000.3	10815	12211	19917	2160	4304	3552	443.722	496.861	687.025	89.4191	174.025	151.232	5.74e-13	-3.8931
Solyc09g075360.4	471	888	1655	198	194	266	6.64237	12.4222	19.6317	2.8074	2.69612	3.89088	1.16e-07	-3.8903
Solyc12g044310.2	357	442	509	46	97	149	4.89592	6.02511	5.87125	0.624845	1.30745	2.11985	1.36e-07	-3.88403
Solyc03g114450.3	7056	8407	14482	1380	2922	2605	137.475	162.449	237.242	27.1192	56.1173	52.6628	1.53e-10	-3.88056
Solyc03g110860.3	2235	2644	3462	372	702	864	52.3021	61.3594	68.119	8.76219	16.1849	20.9704	2.23e-11	-3.88001
Solyc06g083650.3	1741	1496	2761	245	530	596	34.759	29.6089	46.3404	4.92308	10.4111	12.3361	2.93e-09	-3.87958
Solyc02g089080.2	4788	4128	5088	641	1240	1426	136.22	116.48	121.711	18.398	34.7613	42.1061	1.15e-12	-3.87888
Solyc04g006950.4	301	135	87	18	33	56	25.5463	11.3543	6.20644	1.52215	2.76241	4.89007	0.000229881	-3.87822
Solyc07g054120.2	94	46	101	14	22	17	1.41589	0.681547	1.27555	0.212682	0.317282	0.252578	2.89e-06	-3.87801
Solyc04g007290.4	420	276	107	20	92	53	5.36995	3.48941	1.14379	0.251716	1.15783	0.697888	0.000346037	-3.87784
Solyc03g005760.1	299064	352228	532176	45737	107867	117957	10256.1	11979.6	15343.8	1582.65	3646.09	4197.83	2.83e-09	-3.8708
Solyc12g056220.2	12450	18810	24603	2740	5024	5296	267.347	400.57	444.164	59.3657	106.327	117.997	7.07e-12	-3.86756
Solyc10g084430.2	113	121	103	14	41	22	3.44184	3.67432	2.63922	0.416517	1.22941	0.693275	3.95e-07	-3.86725
Solyc10g054820.2	1360	635	1038	45	342	244	29.6011	13.7084	19.0055	0.975135	7.32284	5.51401	0.000193334	-3.86148
Solyc03g005820.3	2514	2051	1840	325	707	516	48.1325	38.9307	29.6079	6.27742	13.3393	10.246	2.25e-12	-3.85878
Solyc10g009320.3	440	483	515	83	132	135	9.46153	10.3092	9.32111	1.78346	2.79355	2.99644	8.74e-20	-3.85228
Solyc01g101100.4	2206	2691	3396	429	711	838	23.3597	28.2626	30.2398	4.58382	7.416	9.20085	2.45e-14	-3.85179
Solyc06g074800.1	352	328	235	76	54	87	9.88075	9.13637	5.53197	2.13306	1.49337	2.52833	1.6e-10	-3.84573
Solyc06g072430.3	351	258	285	84	77	56	8.60634	6.28539	5.88729	2.06573	1.85478	1.40976	2.4e-14	-3.84432
Solyc01g097860.4	10418	7656	11449	1355	2668	3012	206.649	150.603	190.924	27.1076	52.1634	61.9896	2.32e-11	-3.84178
Solyc07g066610.3	27213	33642	64645	4767	13116	10734	386.353	473.693	771.641	68.2902	183.542	158.139	1.22e-07	-3.83834
Solyc12g100120.2	7565	8203	10979	1318	3366	1734	64.9722	69.8712	79.2822	11.4197	28.49	15.4522	7e-11	-3.83662
Solyc10g006970.3	2515	2256	3569	301	908	744	67.1146	59.7142	80.079	8.10272	23.8661	20.5873	1.78e-08	-3.83063
Solyc04g076400.3	44	145	315	29	42	29	0.551446	1.8197	3.36144	0.366	0.518358	0.371992	0.00032453	-3.82564
Solyc12g098850.2	3639	5214	6203	1195	1571	924	81.5726	115.9	116.902	27.0253	34.7063	21.4929	2.37e-18	-3.82522
Solyc08g077380.4	727	758	968	104	290	193	13.8043	14.2784	15.4557	1.98526	5.41475	3.79005	6.54e-10	-3.82399
Solyc08g008305.1	955	1019	1099	239	150	338	26.2002	27.7129	25.329	6.60124	4.0492	9.60761	7.06e-11	-3.82203
Solyc02g086910.4	5959	6507	10343	1062	1673	2600	96.9229	104.965	141.45	17.418	26.8113	43.8783	1.9e-09	-3.8182
Solyc09g056450.4	1489	1020	1599	341	338	338	19.0952	12.9711	17.2366	4.41163	4.26115	4.49198	1.27e-22	-3.81712
Solyc03g083510.4	88	194	328	19	46	62	1.92763	4.24336	6.07053	0.419657	0.985674	1.40094	9.98e-05	-3.81515
Solanum_lycopersicum_newGene_1242	224	104	94	16	42	36	6.33344	2.85938	2.19804	0.427472	1.12985	1.03441	4.99e-05	-3.81325
Solyc08g076520.3	832	769	770	124	206	250	24.4719	22.4144	19.0381	3.67755	5.95685	7.61159	2.25e-13	-3.81031
Solyc03g119860.3	3377	3641	5585	402	1053	1434	69.0535	73.8433	96.0273	8.2825	21.2212	30.4271	5.41e-07	-3.80424
Solyc03g117560.3	719	967	1326	124	249	332	25.3258	33.7953	39.2915	4.38949	8.63656	12.123	2.29e-08	-3.79958
Solyc10g079240.2	48	44	76	6	18	13	0.926855	0.83979	1.24281	0.10831	0.336971	0.252753	3.16e-05	-3.79907
Solyc02g080570.3	6097	6088	8493	1056	2239	1794	38.8577	38.4769	45.5099	6.79007	14.063	11.8614	3.48e-14	-3.79846
Solyc05g013560.3	1847	1737	1718	227	480	577	85.4414	79.6667	66.8071	10.5724	21.8636	27.6762	4.65e-10	-3.79592
Solyc10g077120.3	43094	45396	70397	5378	13462	18033	2110.43	2204.85	2898.52	265.714	649.826	916.431	2.17e-07	-3.79377
Solyc06g069880.1	2446	2115	2290	348	822	530	47.7225	40.9288	37.5579	6.8501	15.8059	10.7203	1.84e-12	-3.79367
Solyc01g097340.3	618	909	1533	167	214	330	10.123	14.7723	21.1217	2.75878	3.45281	5.60543	2.49e-08	-3.79203
Solyc01g005985.1	2984	4569	6144	757	1466	1111	92.3317	140.205	159.84	23.6106	44.6941	35.6616	4.29e-12	-3.78907
Solyc07g052950.3	2441	2255	2363	232	875	580	124.844	114.368	101.587	11.9313	44.101	30.7772	1.96e-07	-3.78755
Solyc04g082010.1	46295	51237	99703	4492	15955	22695	2488.22	2731.08	4505.31	243.558	845.196	1265.78	3.24e-05	-3.7849
Solyc08g008300.1	72	76	77	17	9	25	12.5525	13.2248	11.3697	2.88318	1.45756	4.47288	4.6e-06	-3.78338
Solyc10g054870.3	2193	3786	7569	422	1333	1246	51.0102	87.3487	148.052	9.90092	30.5495	30.0834	1.55e-05	-3.78266
Solyc11g072825.1	32	44	63	8	14	9	4.42456	6.04746	7.31572	1.06601	1.92067	1.23603	2.11e-05	-3.78054
Solyc01g097770.4	14190	16867	17812	1583	5880	4217	113.57	133.875	119.85	12.7823	46.38	35.024	1.42e-07	-3.77844
Solyc06g076400.3	1614	1561	1727	286	655	273	26.896	25.8013	24.1944	4.79431	10.7493	4.70979	2.35e-10	-3.77724
Solyc04g063245.1	2433	1613	1157	15	339	369	38.6369	25.3969	15.4369	0.23016	5.30197	6.06822	0.0123614	-3.7744
Solyc06g069820.4	112	159	181	40	45	25	3.02639	4.27736	4.13191	1.08654	1.20589	0.687286	2.97e-10	-3.77245
Solyc11g042820.2	152	208	188	26	52	55	2.33761	3.17723	2.44352	0.397907	0.787648	0.88161	1.76e-09	-3.77238
Solyc02g067340.4	1284	1108	1543	322	352	329	27.4188	23.4533	27.6946	6.93182	7.40412	7.28743	1.67e-38	-3.7714
Solyc09g065475.1	108	146	71	10	31	32	12.4506	16.8103	6.94141	1.09954	3.44545	3.86211	5.94e-05	-3.76915
Solyc12g036170.2	2742	3368	5302	327	1210	1106	95.4575	116.269	155.179	11.4636	41.5082	39.933	2.56e-06	-3.76473
Solyc03g081320.3	2179	2906	4312	604	837	882	30.7621	40.6854	51.1754	8.59465	11.6335	12.9098	4.04e-15	-3.76394
Solyc04g050170.4	302	235	258	39	108	46	2.51967	1.94285	1.81132	0.322964	0.889791	0.39805	2.31e-07	-3.76266
Solyc02g081330.4	1848	3510	5884	491	1033	1080	20.4282	38.475	54.69	5.47586	11.2559	12.3894	6.54e-07	-3.76262
Solyc01g007800.3	91	128	177	10	29	47	2.8056	3.91196	4.57704	0.288183	0.868155	1.47412	9.35e-05	-3.75956
Solyc04g007780.3	692	257	221	36	114	111	24.2657	8.91545	6.4921	1.25137	3.93522	4.0349	0.000207418	-3.75615
Solyc07g006700.1	61	77	120	20	26	15	2.80388	3.52104	4.68524	0.912938	1.16616	0.690707	3.94e-07	-3.75144
Solyc05g050980.3	531	820	1204	99	244	260	7.29446	11.1813	13.9201	1.36617	3.29909	3.70033	3.57e-07	-3.74773
Solyc05g046310.3	275	248	284	52	100	51	5.51526	4.9283	4.78682	1.05278	1.97948	1.04809	1.29e-11	-3.74753
Solyc09g092490.3	177	270	239	59	72	41	5.5045	8.33054	6.24234	1.8381	2.20625	1.29543	3.34e-12	-3.74136
Solyc03g112460.3	230	352	489	51	113	95	3.61643	5.49978	6.47495	0.800616	1.73985	1.53735	2.42e-08	-3.73935
Solyc12g009200.2	1125	2293	4980	303	726	831	39.5956	80.0663	147.414	10.7388	25.1885	30.3307	3.95e-05	-3.73637
Solyc06g053140.3	9218	7799	11884	1235	2767	3114	243.213	204.062	263.613	32.8571	71.9487	85.2376	1.77e-09	-3.73487
Solyc10g009150.3	401	159	486	19	124	81	14.5939	5.74094	14.8917	0.678848	4.45109	3.03335	0.000499706	-3.73468
Solyc06g071730.3	56	49	95	7	14	23	0.935828	0.817086	1.34205	0.102902	0.22011	0.401236	9.7e-05	-3.73446
Solyc01g107460.2	5358	6337	3251	984	1723	1087	142.445	167.087	72.6609	26.3949	45.1496	29.9918	2.85e-10	-3.73196
Solyc08g067530.1	94	166	386	49	59	37	7.31522	12.7902	25.2212	3.80748	4.47265	2.96527	2.69e-05	-3.7307
Solyc10g044530.1	94	61	77	12	24	20	7.9888	5.17136	5.53748	1.0048	1.97998	1.77262	1.14e-06	-3.72534
Solyc06g068950.4	884	799	2088	177	415	306	13.2738	11.8966	26.3603	2.67667	6.13998	4.76085	6.53e-07	-3.72084
Solyc12g007010.2	4395	4448	5418	742	1441	1449	59.8046	60.0244	61.9836	10.1847	19.3249	20.4567	4.08e-14	-3.7181
Solyc04g081870.4	3184	4170	5292	782	934	1445	71.0639	92.3279	99.3201	17.6128	20.5527	33.4634	1.6e-12	-3.71504
Solyc03g034220.3	105615	143241	283117	20762	49673	55227	3232.01	4347.26	7284.09	641.081	1498.26	1753.81	1.17e-06	-3.71444
Solyc07g056540.3	104053	79628	98394	9849	32328	27490	1584.19	1202.32	1259.46	151.294	485.126	434.315	1.39e-07	-3.71422
Solyc06g008590.3	274	406	362	33	67	140	7.80394	11.4869	8.68697	0.930737	1.87956	4.13179	2.47e-05	-3.70857
Solyc01g090440.2	143	215	362	40	54	77	1.28129	1.91789	2.74047	0.362635	0.47868	0.713258	5.94e-07	-3.7081
Solyc06g065990.1	3592	3915	6416	712	1434	1343	147.366	159.298	221.32	29.4585	57.9819	57.1814	5.41e-11	-3.70809
Solyc12g056830.1	30327	28969	45904	4753	9775	11618	1110.46	1051.96	1413.13	175.608	352.779	441.442	1.43e-09	-3.70565
Solyc01g096240.4	5376	6527	11356	762	2572	2230	122.582	147.615	217.731	17.5299	57.7968	52.7583	1.86e-06	-3.70245
Solyc07g066040.1	185	102	160	27	19	57	7.52317	4.114	5.49364	1.07163	0.742786	2.39923	3.49e-05	-3.69901
Solyc07g042630.4	2034	938	878	92	504	299	21.5123	9.84158	7.80328	0.97812	5.25542	3.27513	0.000191607	-3.69793
Solyc11g006250.2	638	4214	7761	857	927	851	12.2263	80.1873	125.192	16.5797	17.5249	16.9264	0.000542899	-3.69723
Solyc01g109100.2	321	328	414	87	91	99	17.7701	18.0065	19.2487	4.83725	4.91381	5.68684	2.94e-25	-3.69568
Solyc07g042990.1	476	602	867	51	188	216	10.6848	13.3981	16.3619	1.14248	4.15012	5.02468	1.84e-05	-3.69284
Solyc07g044970.1	98	48	43	0	24	3	4.17392	2.01067	1.51737	0	0.98604	0.089136	0.0162759	-3.68999
Solyc01g098190.3	3430	3242	2975	670	1050	839	39.9603	37.4653	29.1459	7.86735	12.0496	10.1454	9.02e-24	-3.68467
Solanum_lycopersicum_newGene_211	75	60	60	18	10	19	3.83996	3.0374	2.58124	0.887039	0.485966	0.981767	3.9e-06	-3.68222
Solyc05g007895.1	104	103	81	20	21	31	6.96753	6.89427	4.57562	1.32969	1.36108	2.11042	6e-08	-3.68037
Solyc07g041720.1	72727	96393	134451	15934	22245	37358	3152.88	4144.37	4900.51	697.012	950.507	1680.66	5.98e-09	-3.67039
Solyc10g055240.2	3270	2739	2572	575	871	832	68.2928	56.7315	45.16	12.1006	17.9287	18.023	1.3e-18	-3.6667
Solyc12g005020.2	384	914	1123	121	300	169	13.4279	31.7317	33.0655	4.26616	10.3495	6.11083	2.32e-06	-3.6659
Solyc10g044520.3	27762	27311	43196	3588	9831	10961	1759.63	1716.79	2301.89	229.477	614.157	720.972	2.3e-07	-3.66296
Solyc03g026040.4	13	421	437	43	26	75	0.085305	2.89706	2.55259	0.296049	0.17451	0.539797	0.00889705	-3.65564
Solyc10g055730.3	100	284	461	25	62	96	2.97363	8.37527	11.5336	0.740496	1.80493	2.94974	0.000487929	-3.65524
Solyc09g011810.3	11715	11865	17833	1452	4536	4341	216.493	217.439	277.057	27.0617	82.6177	83.2337	3.28e-07	-3.65506
Solyc02g062340.3	17845	24470	45672	2569	9471	8916	317.634	431.957	683.49	46.1268	166.149	164.684	1.9e-05	-3.64916
Solyc01g102720.3	397	462	415	90	115	133	9.6629	11.1681	8.49392	2.19421	2.75203	3.36056	4.49e-19	-3.64899
Solyc03g080100.4	201	158	144	31	46	53	3.78581	2.95262	2.27696	0.583667	0.853043	1.02223	3.63e-09	-3.64673
Solyc09g011140.4	3075	3107	3088	596	1008	880	81.7388	81.9155	69.014	15.9673	26.4043	24.2792	1.59e-21	-3.64652
Solyc02g091950.4	833	926	1402	204	261	352	12.2135	13.4616	17.2913	3.01709	3.76131	5.35109	1.41e-12	-3.64233
Solyc02g083810.4	36557	39167	67783	6422	14305	15570	581.948	618.356	907.197	103.157	224.455	257.204	2.24e-08	-3.6384
Solyc09g092130.3	86	156	587	26	85	61	0.638956	1.15943	3.69396	0.194203	0.627461	0.469386	0.00153449	-3.63674
Solyc11g067110.2	345	170	423	62	105	71	6.71029	3.28201	6.91707	1.20925	2.0023	1.41905	2.13e-07	-3.63254
Solyc07g020800.3	119	151	322	12	65	55	3.14117	3.95659	7.1907	0.304415	1.6928	1.49419	0.000526998	-3.63012
Solyc05g013380.3	17090	19012	23602	2773	6930	5886	232.568	256.599	270.047	38.0736	92.95	83.1206	3.12e-10	-3.62741
Solyc10g007600.3	10354	10513	12709	1514	1532	5039	175.451	176.688	181.072	25.8813	25.5746	88.6013	1.39e-05	-3.62429
Solyc04g071490.3	74	91	94	18	30	19	1.7835	2.18242	1.92605	0.418878	0.707718	0.476541	1.04e-08	-3.62405
Solyc06g035920.3	536	430	477	70	188	120	15.2641	12.1313	11.4039	2.00094	5.25717	3.54092	1.13e-08	-3.62345
Solyc03g118780.3	27	133	308	33	18	40	0.69503	3.40525	6.71524	0.8627	0.439532	1.0659	0.00317289	-3.62223
Solyc03g006840.4	279	227	543	27	72	139	3.21946	2.59985	5.27108	0.309306	0.809608	1.6604	0.000280304	-3.61935
Solyc02g069910.2	152	219	596	59	87	83	13.0497	18.6154	42.9951	5.094	7.35286	7.36804	2.95e-05	-3.61905
Solyc10g052530.1	104	111	88	15	13	43	6.5032	6.87988	4.65175	0.950241	0.75036	2.79377	0.000145731	-3.61614
Solyc08g079090.4	806	1714	3760	272	575	628	9.28371	19.58	36.4189	3.15114	6.52773	7.50688	5.35e-05	-3.6152
Solyc10g080940.3	12040	13120	18169	2087	4523	4699	232.464	251.219	294.934	40.6459	86.0703	94.15	3.57e-10	-3.61383
Solyc11g013270.2	290	432	811	92	134	157	4.80513	7.1014	11.3023	1.52353	2.18537	2.68607	2.84e-07	-3.61329
Solyc01g110160.4	398	416	1053	99	181	182	8.23874	8.54319	18.3664	2.05362	3.69199	3.91638	1.72e-06	-3.61028
Solyc11g005710.2	117	468	673	45	116	122	1.17869	4.67498	5.70148	0.457003	1.14567	1.26812	0.000458488	-3.60493
Solyc06g065670.4	1513	2025	2632	425	522	686	9.51664	12.6351	13.9252	2.69811	3.23309	4.4747	4.11e-14	-3.60038
Solyc08g079100.3	756	783	1000	167	272	250	18.8416	19.3455	20.9583	4.18492	6.67242	6.44192	6.31e-19	-3.5916
Solyc03g098320.4	900	634	587	144	274	154	12.6947	8.87127	6.96265	2.04184	3.8104	2.24318	1.3e-09	-3.58966
Solyc08g080780.4	2620	3477	5741	562	1093	1370	18.4431	24.2761	33.9817	3.98717	7.58018	10.0057	1.18e-07	-3.58742
Solyc09g064520.3	286	321	420	49	110	110	2.40858	2.6756	2.96829	0.414924	0.911483	0.955739	8.17e-09	-3.58731
Solyc11g009080.2	27275	31679	28682	5776	9927	8352	376.013	433.118	332.434	80.3435	134.89	119.485	1.81e-20	-3.58723
Solyc09g011720.3	1544	2261	2638	304	579	786	13.9272	20.2292	20.0125	2.76828	5.15023	7.35625	2.93e-08	-3.58432
Solyc02g069620.4	1115	1062	1503	142	374	435	24.851	23.4909	28.1722	3.19119	8.21152	10.0509	3.8e-07	-3.57625
Solyc06g074260.4	480	800	1373	237	232	217	8.01578	13.2344	19.2647	3.98181	3.80795	3.75362	9.05e-09	-3.576
Solyc07g006550.2	553	797	773	70	281	194	19.7197	28.226	23.2066	2.52145	9.86413	7.17221	5.83e-06	-3.56917
Solyc08g083360.3	3689	4152	7310	377	1614	1720	127.442	142.275	212.327	13.1099	54.9646	61.6456	6.03e-05	-3.56687
Solyc07g066310.3	202158	165415	193605	29467	60829	62009	7127.82	5784.16	5739.08	1048.34	2113.95	2268.84	4.07e-11	-3.56056
Solyc04g064610.3	14	300	306	31	45	43	0.334058	7.40677	6.4024	0.760264	1.08152	1.09795	0.00698441	-3.55915
Solyc03g063560.3	26670	29292	38698	5339	10546	9827	125.72	136.939	153.368	25.3906	48.9988	48.0723	5.94e-13	-3.55715
Solyc06g071370.1	393	218	260	74	104	57	22.9817	12.6374	12.7674	4.36094	5.99812	3.42826	4.29e-08	-3.5533
Solyc09g010140.3	606	357	342	65	140	141	23.0819	13.4918	10.9352	2.47911	5.24841	5.55739	1.1e-06	-3.55075
Solyc01g095530.2	10430	4237	3716	1037	2153	1648	524.734	211.394	157.151	52.6444	106.753	86.0261	1.24e-05	-3.54986
Solyc06g076120.2	805	740	1122	162	260	301	23.6604	21.5686	27.7131	4.78122	7.52244	9.17084	4.37e-12	-3.54543
Solyc11g073260.2	112	207	461	50	49	87	5.0939	9.30713	17.6166	2.27987	2.16786	4.1021	0.000113425	-3.54539
Solyc01g008220.3	351	161	162	82	38	51	13.3185	6.06081	5.16403	3.13261	1.42149	2.00808	4.35e-05	-3.54499
Solyc01g110580.2	607	848	751	146	147	292	29.9846	41.5183	31.1626	7.24599	7.1406	14.9556	1.05e-08	-3.54216
Solyc08g061590.4	3461	3388	2311	828	844	885	67.8187	65.8424	38.0692	16.3657	16.2959	17.983	2.4e-16	-3.53938
Solyc04g063240.3	3549	4258	5578	662	1437	1503	81.8002	97.3473	108.109	15.3807	32.6373	35.9338	1.53e-09	-3.53589
Solyc09g059460.4	417	332	344	93	83	124	6.18659	4.88377	4.28558	1.38162	1.20376	1.9071	1.83e-12	-3.53494
Solyc06g072710.3	2270	3131	4880	643	1188	943	28.0983	38.4386	50.7863	8.02294	14.4973	12.1056	2.02e-10	-3.53332
Solyc01g109550.2	444	379	644	78	158	158	12.5094	10.5794	15.2449	2.21053	4.38647	4.61921	5.48e-09	-3.53258
Solyc07g066050.4	83	54	87	15	25	19	4.27456	2.7451	3.76473	0.742647	1.26812	0.972139	1.46e-06	-3.53104
Solyc10g086410.3	3446	3399	3065	1380	761	519	39.3551	38.5011	29.4278	15.8965	8.56117	6.1415	4.96e-08	-3.52729
Solyc10g050510.1	286	187	142	18	35	93	46.0172	29.8223	19.2056	2.81249	5.43323	15.3962	0.000873371	-3.52143
Solyc06g074000.1	537	802	1310	122	300	271	10.6703	15.8163	21.8962	2.44771	5.87679	5.59221	1.29e-06	-3.51656
Solyc06g007160.4	2436	2351	3432	224	912	971	39.3827	37.6902	46.6542	3.64814	14.5364	16.2797	2.96e-05	-3.5156
Solyc04g082000.4	6448	6814	12615	611	2335	3408	51.0982	53.5518	84.0532	4.87877	18.2373	28.0285	0.000162948	-3.51487
Solyc01g100770.2	2232	2675	3370	405	1332	477	80.3122	95.4683	101.96	14.6976	47.2321	17.8144	2.58e-06	-3.51216
Solyc01g097000.3	889	1237	2121	115	495	453	10.5312	14.535	21.133	1.37166	5.78317	5.56768	9.2e-05	-3.51114
Solyc03g119540.3	8227	9168	8894	1097	2440	3499	148.541	164.171	135.004	19.9759	43.4112	65.5493	3.37e-07	-3.50787
Solyc10g008020.3	3303	3465	5111	521	1243	1420	62.4189	64.9385	81.1968	9.92653	23.1384	27.8412	1.04e-07	-3.50733
Solyc09g009940.3	10620	10032	12772	1673	3325	4133	142.898	133.871	144.488	22.7062	44.0967	57.7056	2.05e-09	-3.50596
Solyc06g074510.4	1981	1955	3100	306	898	692	29.5369	28.9097	38.8636	4.58983	13.1862	10.7078	1.77e-07	-3.50454
Solyc12g038347.1	132	115	176	14	58	37	7.27191	6.27667	8.18196	0.778125	3.12325	2.11363	5.4e-05	-3.50384
Solyc03g025710.3	96	322	429	42	121	41	2.3974	8.01671	9.0532	1.04448	2.97627	1.05696	0.000626201	-3.50367
Solyc06g071220.1	106	69	54	13	19	27	7.15825	4.56862	3.02908	0.834637	1.25137	1.86757	8.18e-05	-3.49989
Solyc12g009820.2	104	213	252	25	31	82	1.41379	2.89309	2.90451	0.346115	0.409072	1.16692	0.000266488	-3.4968
Solyc11g066060.3	12740	14450	21028	5783	4120	3460	160.691	180.747	222.988	73.5963	51.2088	45.2779	1.35e-13	-3.49335
Solyc07g065860.3	337	332	447	52	131	121	2.70969	2.64425	3.0221	0.422174	1.03231	1.00856	5.93e-08	-3.49265
Solyc03g121600.4	279	2230	4137	529	456	497	3.6	28.5964	44.9731	6.89615	5.80434	6.65823	0.0020122	-3.48696
Solyc12g009920.1	140	159	89	13	55	32	6.15532	6.89797	3.27987	0.562933	2.35018	1.41923	0.000218484	-3.48637
Solyc06g062580.3	422	1168	2015	200	219	459	3.85262	10.5867	15.4807	1.83845	1.96923	4.35376	0.000194417	-3.48318
Solyc06g065690.3	883	1236	1723	293	336	433	9.09957	12.6252	14.9261	3.042	3.40649	4.6258	3.55e-12	-3.4813
Solyc10g050460.1	87	73	52	11	12	30	11.7056	9.67074	5.79756	1.46653	1.59863	4.13108	0.000356707	-3.47721
Solyc12g013810.2	4746	5327	7998	981	1814	2170	173.758	193.438	246.199	36.2148	65.441	82.4234	2.26e-09	-3.47655
Solyc08g066610.3	286	346	660	53	156	130	16.7311	20.0849	32.4733	3.1133	8.98064	7.86738	1.43e-05	-3.47073
Solyc01g098640.3	6898	7001	9472	840	2644	2805	145.068	146.007	167.471	17.8086	54.7911	61.2126	2.29e-06	-3.47072
Solyc03g118510.3	804	1401	2296	270	401	525	9.17431	15.8647	22.0411	3.10068	4.50509	6.21799	7.04e-07	-3.47047
Solyc01g110590.4	100	165	132	21	28	55	7.71458	12.5993	8.53878	1.56251	2.07753	4.35221	2.03e-05	-3.46644
Solyc03g083060.3	1822	1780	2571	394	689	666	17.045	16.5089	20.2174	3.71497	6.34561	6.46153	9.4e-14	-3.46322
Solanum_lycopersicum_newGene_1452	79	72	67	19	23	0	1.4194	1.29236	1.00772	0.332566	0.39523	0	0.014342	-3.463
Solyc12g042180.1	207	190	379	51	101	60	7.42752	6.7368	11.4381	1.82516	3.5627	2.23425	2.62e-07	-3.462
Solyc09g011010.3	891	1123	1273	229	320	385	36.9403	46.1524	44.3566	9.57829	13.0693	16.5481	4.37e-15	-3.45652
Solyc11g068530.1	376	237	309	57	93	108	10.5865	6.60356	7.31383	1.61409	2.55928	3.15599	1.86e-08	-3.45517
Solyc03g118120.3	1058	1063	2183	115	530	459	32.8863	32.7491	57.0296	3.60642	16.2103	14.7754	0.000141749	-3.45473
Solyc07g016170.4	440	693	943	141	170	256	3.86952	6.04816	6.97437	1.24877	1.4668	2.33387	2.49e-08	-3.45371
Solyc07g065840.2	182676	161861	117865	45847	43774	44423	2060.87	1810.98	1117.94	521.898	486.747	520.072	3.93e-16	-3.45204
Solyc03g113450.4	143	275	439	75	46	99	1.64599	3.15796	4.27327	0.875763	0.520155	1.19061	3.21e-05	-3.45137
Solyc10g009030.4	1105	1242	1433	248	363	463	24.4151	27.2336	26.627	5.51159	7.89223	10.608	2.18e-13	-3.44985
Solyc07g045440.1	2085	3121	6168	568	1051	1378	46.7297	69.3684	116.232	12.8314	23.2094	32.0366	6.88e-06	-3.44964
Solyc03g025850.3	8471	9163	10102	2832	2577	2690	233.309	250.307	233.926	78.695	69.9476	76.8857	3.6e-59	-3.44962
Solyc11g068515.1	1920	2390	3488	534	702	944	85.6496	105.712	130.83	24.0137	30.8596	43.6845	4.11e-11	-3.44847
Solanum_lycopersicum_newGene_1856	255	220	275	41	87	83	6.90437	5.89682	6.25564	1.10027	2.30989	2.3209	5.72e-09	-3.44753
Solyc07g054210.3	21680	21931	35658	3490	8706	9521	361.404	362.569	499.741	58.6979	143.046	164.691	3.39e-07	-3.44596
Solyc10g076710.3	1525	1499	2519	308	644	598	19.4962	19.003	27.084	3.97054	8.11744	7.92609	2.87e-09	-3.44522
Solyc10g008120.4	275	67	176	28	53	52	5.48012	1.31543	2.94501	0.552273	1.02882	1.06136	0.000430013	-3.4437
Solyc04g074430.2	378	175	771	149	75	109	26.6926	12.2605	45.7909	10.5847	5.17845	7.94088	0.000170895	-3.4432
Solyc09g074450.1	602	770	961	84	279	268	41.5754	52.7646	55.7877	5.83665	18.9938	19.2023	6.66e-06	-3.44068
Solyc10g005690.3	391	571	753	94	186	196	3.63044	5.26781	5.89207	0.877468	1.69832	1.89264	4.12e-08	-3.43432
Solyc03g119930.1	2426	2786	3801	507	1082	968	48.5706	55.3203	63.9847	10.2268	21.3413	20.0996	2.24e-10	-3.4335
Solyc09g075790.3	135	271	376	47	87	77	1.77628	3.5515	4.17687	0.624181	1.12224	1.04833	3.82e-06	-3.43177
Solyc10g005400.3	81	1184	3700	261	130	297	1.76646	25.6119	67.855	5.72331	2.78261	6.71342	0.0293236	-3.43085
Solyc01g102310.3	3733	4835	6108	1352	1599	1322	37.2488	47.8464	51.2448	13.613	15.7219	13.6841	3.02e-26	-3.43006
Solyc03g046270.4	144	259	201	61	55	55	2.72912	4.87704	3.20343	1.15411	1.01345	1.07606	7.1e-10	-3.42878
Solyc04g055250.4	98	363	528	80	79	91	2.93366	10.7628	13.2817	2.39325	2.31794	2.80307	0.000202764	-3.42773
Solyc01g079790.4	4920	6477	10021	918	2272	2642	70.3902	91.9042	120.549	13.2425	32.0315	39.2261	1.91e-06	-3.42649
Solyc06g084420.1	124	295	315	39	72	85	2.82292	6.67278	6.04888	0.892156	1.60567	2.00368	1.56e-05	-3.42598
Solyc01g098990.4	2766	2717	4140	571	998	1159	59.9012	58.3487	75.3767	12.4635	21.2996	26.032	1.87e-10	-3.42583
Solyc06g069760.3	4606	5100	4521	1539	1366	1295	59.5368	65.3798	49.1302	20.0636	17.3958	17.365	6.51e-35	-3.42415
Solyc02g083410.4	1811	2121	3021	423	745	809	16.7162	19.4141	23.4379	3.93361	6.77705	7.74	8.69e-11	-3.4209
Solyc03g114930.3	2418	2553	4342	319	935	1233	61.5565	64.4544	92.9351	8.17417	23.4543	32.567	2.53e-05	-3.41857
Solyc03g059170.2	1902	1964	2431	324	666	794	87.9627	90.0755	94.5375	15.0894	30.3671	38.1094	7.04e-09	-3.41666
Solyc07g007440.1	80	113	201	14	52	36	1.72929	2.43685	3.68806	0.287537	1.11189	0.797894	0.000284813	-3.40922
Solyc10g005000.4	81	182	174	16	52	47	1.50159	3.36204	2.71843	0.290565	0.945582	0.900104	0.000177694	-3.40309
Solyc03g062720.3	1115	1341	2617	167	680	505	21.4803	25.6187	42.3928	3.23875	12.8968	10.0861	7.84e-05	-3.40224
Solyc07g018240.1	1004	1871	2754	335	588	634	33.6476	62.2098	77.6454	11.3266	19.4143	22.0617	5.04e-07	-3.40049
Solyc07g064970.4	3718	5695	7299	1068	1744	1955	45.1894	68.6555	74.5936	13.0945	20.8972	24.6596	4.41e-10	-3.39917
Solyc11g008810.2	804	1293	1786	211	421	455	11.1972	17.8663	20.921	2.96638	5.77678	6.57018	2.31e-07	-3.39296
Solyc01g090760.4	117	155	105	7	10	65	2.99615	3.94368	2.25293	0.170473	0.25173	1.72091	0.00823819	-3.3914
Solyc09g092340.4	216	367	559	71	87	151	4.56041	7.70656	9.94348	1.51514	1.79668	3.32048	8.55e-06	-3.39033
Solyc03g053110.3	9938	10452	14719	1958	3591	4508	235.403	245.523	293.12	46.7927	83.831	110.804	3.35e-09	-3.38628
Solyc04g049800.3	795	638	820	174	247	248	16.1643	12.8571	14.0053	3.56513	4.9317	5.21218	1.06e-17	-3.38378
Solyc08g083320.4	5746	6316	9992	1173	2641	2488	65.8688	71.8055	96.3095	13.5578	29.8354	29.5945	1.94e-08	-3.38328
Solyc01g067700.3	90	118	257	28	64	32	1.77232	2.32433	4.29579	0.551336	1.25491	0.65792	0.000116411	-3.383
Solyc05g056300.4	5690	6166	7561	1194	2592	1931	195.84	210.492	218.804	41.4456	87.9157	68.9732	6.41e-12	-3.37863
Solyc08g067030.3	11809	13127	16839	1399	4280	5820	211.703	233.385	253.789	25.302	75.6234	108.258	2.39e-05	-3.37083
Solyc07g061940.4	26166	26930	22490	6585	9656	6641	376.929	384.739	272.373	95.7093	137.099	99.2681	1.16e-20	-3.36946
Solyc03g115560.3	1114	924	1036	196	419	298	17.1009	14.0723	13.3699	3.02661	6.32898	4.73926	5.04e-11	-3.36897
Solyc06g082410.1	80	65	104	19	31	21	5.78834	4.64173	6.34068	1.33138	2.22097	1.57369	6.48e-07	-3.36881
Solyc12g006520.2	2443	2315	2621	419	971	787	32.0229	30.0977	28.8827	5.53682	12.5418	10.7038	2.63e-10	-3.36774
Solyc04g071480.1	3630	2209	3028	848	898	903	85.7433	51.7394	60.1309	20.1947	20.8903	22.1391	1.78e-15	-3.36759
Solyc10g084950.3	623	675	753	122	226	253	9.31347	9.99862	9.46199	1.83997	3.32977	3.91092	1.78e-10	-3.36602
Solyc03g006410.3	1831	1038	1211	48	633	347	40.0259	22.5012	22.2513	1.05902	13.6217	7.85121	0.00330727	-3.36408
Solyc12g008490.2	371	574	820	140	162	204	4.62711	7.0928	8.59898	1.75958	1.98241	2.64104	3.21e-09	-3.36405
Solyc12g014140.3	8784	8711	13009	1289	3455	3892	204.369	200.992	254.468	30.2438	79.2315	93.9671	1.47e-06	-3.36344
Solyc01g080280.3	28747	34660	59308	5328	12920	15894	434.074	519.037	752.914	81.1653	192.285	249.038	4.88e-06	-3.36331
Solyc03g118630.3	573	495	645	85	208	203	16.7252	14.3272	15.8377	2.50077	5.97697	6.1483	1.06e-07	-3.36107
Solyc12g096890.1	63	43	67	6	12	26	2.32491	1.56241	2.09953	0.207096	0.410135	0.98123	0.00130569	-3.35837
Solyc05g047600.4	192	291	460	33	103	117	2.67006	4.02199	5.38607	0.462704	1.40654	1.67991	0.000143769	-3.35665
Solyc11g008630.3	4265	5903	7674	1008	2343	1850	74.5688	102.355	112.799	17.7771	40.3737	33.5597	8.44e-09	-3.35285
Solyc04g010285.1	406	264	141	0	14	56	15.2277	9.80771	4.43023	0	0.485551	2.17597	0.0463808	-3.35193
Solyc12g089220.3	7877	3872	3724	1346	1904	1335	139.925	68.2034	55.6202	24.1238	33.3388	24.6109	1.94e-07	-3.34987
Solyc10g047530.2	84	130	247	4	52	49	1.13793	1.75384	2.81974	0.049094	0.697067	0.678227	0.00765103	-3.3487
Solyc06g007580.1	230	187	192	27	86	62	7.01929	5.66198	4.94376	0.829485	2.5824	1.96856	9.61e-06	-3.34469
Solyc02g085145.1	52	32	411	30	33	40	4.4763	2.72622	29.896	2.59274	2.78206	3.54048	0.0117404	-3.34453
Solyc01g096880.4	2196	2532	2614	488	904	815	30.1614	34.4924	30.184	6.75873	12.2276	11.6133	2.63e-14	-3.3436
Solyc11g012860.3	1193	1653	1909	327	529	557	12.9397	17.7871	17.416	3.57726	5.64949	6.26453	1.88e-12	-3.33874
Solyc04g014510.3	1203	1106	1767	303	375	522	21.6924	19.7912	26.8035	5.5126	6.6602	9.76577	3.95e-11	-3.33817
Solyc03g098795.1	58	12944	48	108	203	82	1.79501	401.283	1.24071	3.40332	6.24326	2.65235	0.047606	-3.33231
Solyc08g079740.3	549	895	1254	204	333	254	4.22298	6.83225	8.11594	1.58065	2.52582	2.02161	3.5e-09	-3.33093
Solyc11g009060.2	3035	3055	2959	481	1092	1114	55.8486	55.764	45.776	8.93201	19.7947	21.2659	9.43e-09	-3.33092
Solyc11g067140.2	1909	1207	2269	339	564	676	14.2287	8.91823	14.2175	2.54794	4.13908	5.22795	2.56e-08	-3.32955
Solyc06g019170.3	630	315	734	97	196	190	6.66946	3.30763	6.53073	1.02649	2.03998	2.08123	3.18e-06	-3.32917
Solyc02g088320.4	48	53	40	11	18	11	0.720094	0.796643	0.503549	0.166297	0.264073	0.167437	4.69e-05	-3.32594
Solyc11g066080.2	425	490	686	113	163	198	14.175	16.225	19.2566	3.77717	5.35102	6.84139	8.84e-11	-3.3258
Solyc03g115640.3	1145	1114	1476	114	424	504	32.3651	31.2322	35.081	3.23326	11.794	14.7892	7.69e-05	-3.32436
Solyc10g079300.2	379	507	523	67	123	210	3.34031	4.42811	3.87183	0.589415	1.06406	1.91911	7.54e-06	-3.32395
Solyc06g048950.3	808	1018	1698	270	363	402	6.79119	8.48353	11.9994	2.2883	3.00336	3.49982	5.45e-10	-3.32377
Solyc01g010710.4	199	354	451	50	100	132	3.16227	5.59656	6.04155	0.79592	1.56929	2.1747	1.64e-05	-3.32035
Solyc03g006870.3	3826	3970	7215	1028	1783	1629	40.8662	42.0577	64.7951	11.0768	18.7698	18.0515	6.59e-10	-3.31925
Solanum_lycopersicum_newGene_52	252	376	930	131	154	146	6.77529	10.0257	21.0621	3.53726	4.08935	4.07272	2.43e-05	-3.31893
Solyc02g068170.1	943	402	130	102	153	140	51.8843	21.9016	6.00797	5.64347	8.24681	7.96854	0.00207889	-3.31816
Solyc05g012030.1	264	340	281	23	114	107	7.85034	10.0339	7.04934	0.671644	3.32666	3.30512	0.000352574	-3.31445
Solyc04g079230.4	2380	1396	767	271	548	501	153.999	89.5726	41.6891	17.6362	34.9194	33.5924	5.49e-05	-3.31253
Solyc03g059180.4	6080	6294	8531	1270	2554	2456	87.481	89.8251	103.204	18.4378	36.2208	36.6692	1.17e-10	-3.3091
Solyc09g065180.3	6474	7700	14529	1218	3015	3844	113.834	134.281	214.786	21.6029	52.2394	70.1326	2.23e-05	-3.30659
Solyc08g078190.2	753	112	718	149	76	176	21.4113	3.14935	17.1676	4.27695	2.10796	5.17638	0.00267028	-3.30532
Solyc01g100530.3	1886	2039	3067	395	787	886	15.4303	16.5418	21.0986	3.25446	6.34048	7.51757	2.57e-08	-3.30159
Solyc01g106480.4	20548	18884	21434	3032	7680	7480	310.779	283.256	272.546	46.264	114.488	117.397	6.43e-08	-3.30157
Solyc06g051250.1	445	356	317	54	161	116	25.7183	20.3922	15.3692	3.13985	9.14248	6.95623	5.36e-06	-3.30059
Solyc04g015490.4	5269	5295	8113	996	1867	2604	56.8499	56.6643	73.5999	10.8407	19.8488	29.1542	2.53e-07	-3.29977
Solyc11g011020.2	721	1182	1689	245	395	416	8.00174	13.0088	15.7543	2.74024	4.31838	4.78322	4.02e-08	-3.29793
Solyc03g121540.3	1783	2028	1617	306	612	713	15.8708	17.9066	12.1059	2.74104	5.37034	6.58739	2.55e-08	-3.29602
Solyc08g077020.1	147	89	212	66	18	35	10.8644	6.50052	13.183	4.89771	1.28432	2.63274	0.000671659	-3.29569
Solyc04g005660.4	151	275	318	25	84	96	8.84782	16.0065	15.7154	1.46047	4.84507	5.8348	0.000254791	-3.2952
Solyc03g118240.4	7102	7440	12257	1179	2908	3646	153.202	159.17	222.314	25.661	61.821	81.6155	5.33e-06	-3.29331
Solyc10g008840.3	336	233	114	25	68	94	9.06593	6.2298	2.57715	0.67783	1.81267	2.61829	0.0011856	-3.29012
Solyc02g078850.1	314	671	978	149	165	244	19.7091	41.8578	51.7487	9.42026	10.1767	15.9216	7.39e-06	-3.2895
Solyc09g092500.1	2279	1880	2347	362	1214	328	44.4691	36.3691	38.495	7.10809	23.3446	6.63702	6.13e-05	-3.28801
Solyc01g111830.3	4950	5711	6753	1194	2173	1975	97.7494	111.865	112.125	23.7901	42.2898	40.4677	5.88e-14	-3.28691
Solyc08g005610.3	946	446	1023	375	144	161	13.0414	6.09946	11.8589	5.21845	1.94626	2.29398	8.46e-05	-3.28394
Solyc04g077020.3	87886	102414	136609	22185	38063	39314	1408.03	1627.24	1840.06	358.629	601.056	653.605	3.12e-12	-3.28141
Solyc01g109040.4	5877	7033	12388	1263	2856	3241	257.202	305.232	455.789	55.7696	123.193	147.163	2.61e-06	-3.28008
Solyc06g082970.3	1802	1897	3060	400	771	847	63.1805	65.9896	90.2384	14.138	26.6532	30.8327	2.37e-08	-3.2791
Solyc03g098060.3	252	361	329	43	83	144	12.8429	18.2494	14.0878	2.16456	4.16308	7.60604	3.35e-05	-3.2787
Solyc12g010540.1	1057	606	1339	250	248	390	22.4286	12.7512	23.887	5.33936	5.1814	8.57985	1.83e-07	-3.27704
Solyc05g009820.4	2076	2922	4104	592	999	1132	36.0066	50.2688	59.8587	10.3484	17.0735	20.3802	6.9e-09	-3.27586
Solyc06g076020.3	963	454	839	351	137	158	11.4325	5.3427	8.36737	4.20474	1.59478	1.94243	5.51e-05	-3.27312
Solyc03g112580.3	2183	2440	2758	361	996	865	16.0159	17.7534	17.0151	2.6711	7.20427	6.58359	1.94e-07	-3.27287
Solyc11g044940.1	548	863	1169	212	311	258	5.68313	8.868	10.1923	2.2116	3.17035	2.76862	2.12e-10	-3.27187
Solyc03g097320.3	909	646	978	67	340	308	13.5182	9.5152	12.2214	0.999404	4.97239	4.74111	0.000341789	-3.27049
Solyc01g080870.3	1055	901	364	102	265	299	12.6664	10.7248	3.67472	1.23588	3.12913	3.72173	0.000333212	-3.26985
Solyc10g005340.3	103	269	415	44	99	75	3.07197	7.96976	10.4238	1.30416	2.9081	2.32547	0.000275711	-3.2693
Solanum_lycopersicum_newGene_1921	191	258	385	25	107	100	5.0068	6.81729	9.17356	0.645663	2.86578	2.78854	0.000373929	-3.26809
Solyc03g007970.2	58	62	139	12	20	37	0.872595	0.913884	1.75973	0.177261	0.285982	0.57215	0.00102569	-3.26504
Solyc02g063150.3	51943	68614	145947	10230	29957	34593	1678.97	2199.55	3966.24	333.648	954.419	1160.37	0.000137835	-3.26125
Solyc02g078950.4	917	1088	1437	153	481	389	8.54867	10.062	11.2692	1.43814	4.41962	3.76277	3.6e-06	-3.26086
Solyc02g093525.1	593	509	512	108	225	168	19.8825	16.9366	14.4561	3.63175	7.42611	5.82477	6.37e-10	-3.25949
Solyc01g090790.4	7931	5892	6870	1832	2704	1997	116.493	85.8259	84.8341	27.148	39.149	30.437	9.95e-18	-3.25917
Solyc08g008020.1	125	145	327	46	47	76	1.14733	1.31348	2.52123	0.423944	0.422327	0.718033	4.64e-05	-3.25837
Solyc06g065680.3	99	448	801	122	98	131	1.26177	5.68165	8.62194	1.57387	1.23617	1.73957	0.00167487	-3.25323
Solyc06g069150.1	593	397	538	79	228	157	22.1353	14.673	16.8848	2.95731	8.36293	6.07363	3e-06	-3.24553
Solyc07g056650.4	678	990	1227	184	274	410	13.9188	20.1398	21.1668	3.80272	5.54449	8.71962	2.04e-07	-3.24201
Solyc05g051560.4	561	581	600	120	227	199	9.2936	9.53823	8.3545	2.00299	3.70022	3.40544	3.33e-12	-3.24007
Solyc12g036650.2	226	139	242	27	54	93	10.3333	6.27899	9.31764	1.22161	2.43568	4.37714	0.000180809	-3.23775
Solyc04g080040.3	1393	1081	872	298	406	355	14.4104	11.0936	7.58092	3.10309	4.13735	3.8035	1.98e-11	-3.23365
Solyc08g080400.2	62	76	164	3	40	30	0.834065	1.00892	1.85737	0.027289	0.524698	0.415649	0.0104954	-3.23169
Solyc08g008630.4	7264	5878	7147	1120	2773	2397	189.279	151.898	156.591	29.4416	71.2081	64.8176	3.91e-08	-3.23109
Solyc07g007240.3	83	381	410	98	71	71	4.38058	19.9075	18.192	5.18548	3.68361	3.84061	0.000694302	-3.23081
Solyc07g005370.4	1466	1710	1835	418	634	543	54.5311	63.0666	57.3787	15.686	23.2346	20.9386	3.32e-23	-3.22987
Solyc11g032050.2	44	35	58	7	15	17	1.00262	0.784628	1.10929	0.144568	0.320127	0.397279	0.00037334	-3.22782
Solyc01g100120.4	32	51	88	5	15	24	0.2491	0.396119	0.586481	0.034894	0.111396	0.196425	0.00417661	-3.22779
Solyc08g015940.3	122	97	71	20	18	45	5.95085	4.69353	2.90175	0.938227	0.821085	2.27955	0.000390932	-3.22737
Solyc01g067890.4	11516	15827	24225	3312	6035	6343	115.001	156.747	203.391	33.3705	59.3948	65.7237	3.54e-08	-3.22724
Solyc02g084610.1	700	725	850	121	250	322	15.4545	15.882	15.7864	2.68909	5.43913	7.37563	4.1e-07	-3.22535
Solyc02g081060.4	910	581	1257	120	352	343	38.3232	24.2794	44.5369	5.08581	14.6192	14.9795	4.14e-05	-3.21653
Solyc02g086370.4	186	282	260	55	106	66	3.35543	5.03499	3.94656	0.994013	1.87856	1.22565	1.48e-08	-3.21542
Solyc06g063330.3	324	381	384	124	118	106	3.74439	4.37125	3.73216	1.43776	1.34518	1.27085	8.46e-23	-3.21406
Solyc12g015880.2	8132	8113	11564	3044	3049	2783	104.965	103.849	125.492	39.644	38.789	37.2674	7.28e-30	-3.21342
Solyc12g036150.1	180	262	322	60	113	63	4.41484	6.36224	6.65105	1.47405	2.71832	1.60269	1.02e-07	-3.21285
Solyc09g075560.1	698	683	1047	152	258	335	17.4223	16.9126	21.9739	3.82593	6.33763	8.66814	5.96e-08	-3.2118
Solyc11g032220.2	136	75	54	29	32	17	3.98586	2.16508	1.32133	0.837794	0.912831	0.492098	0.00050864	-3.20734
Solyc05g007780.3	2920	2852	5175	414	1415	1407	92.7536	89.833	138.183	13.2425	44.2744	46.3629	6.06e-05	-3.20586
Solyc01g104750.4	256	356	219	92	104	66	4.49772	6.19805	3.22548	1.61828	1.7907	1.19238	1.4e-08	-3.20262
Solyc01g006780.4	192	103	119	29	54	44	8.46405	4.47419	4.39897	1.25218	2.31467	2.0142	1.84e-05	-3.20141
Solyc03g118370.3	515	923	1388	154	375	316	7.99063	14.2166	18.1151	2.41108	5.74013	5.0928	1.62e-05	-3.19955
Solyc02g064640.4	754	683	715	138	318	227	24.1688	21.7123	19.2609	4.45938	10.0215	7.53601	4.48e-09	-3.19874
Solyc01g094700.4	3893	4796	6399	1382	2115	1310	62.9129	76.8611	86.9448	22.5372	33.6897	21.964	3.87e-14	-3.19831
Solyc09g065040.1	73	62	103	24	27	22	4.78889	4.04903	5.71246	1.5861	1.75878	1.44825	1.06e-06	-3.19638
Solyc04g081790.3	231	387	728	81	175	141	4.84779	8.05097	12.843	1.69602	3.61529	3.05609	5e-05	-3.19599
Solyc08g007040.3	3048	3839	6944	475	1609	1924	125.792	157.147	240.951	19.7511	65.4401	82.3949	0.000229083	-3.19268
Solyc02g077090.4	1519	2348	3576	631	780	891	18.7852	28.7966	37.1881	7.87091	9.50132	11.4373	5.24e-09	-3.19095
Solyc11g007530.2	381	385	311	48	172	111	15.598	15.6332	10.7001	1.96212	6.93061	4.72481	3.7e-05	-3.1892
Solyc06g049030.4	537	491	574	91	187	222	12.977	11.7663	11.6786	2.21007	4.45772	5.55239	2.08e-07	-3.18675
Solyc08g006990.3	562	485	480	113	213	165	9.68346	8.29251	6.95454	1.94934	3.61581	2.94168	8.28e-11	-3.18527
Solyc05g009720.3	484	640	519	123	233	171	10.0988	13.2584	9.10643	2.57739	4.78866	3.69456	8.65e-11	-3.18363
Solyc10g005960.1	2367	2926	4680	673	1209	1227	52.2728	64.1085	86.9129	14.994	26.3204	28.114	1.84e-08	-3.18036
Solyc05g005760.4	920	1588	2886	290	638	671	12.2001	20.9019	32.2068	3.88256	8.34241	9.23496	5e-05	-3.17877
Solyc03g122070.3	161	30	75	5	27	34	2.2067	0.408053	0.861599	0.066182	0.354842	0.483123	0.0151213	-3.17763
Solyc06g035580.3	4	420	421	61	41	63	0.050045	5.89865	5.01761	0.859695	0.561439	0.918906	0.0334813	-3.17649
Solyc05g055740.4	468	415	482	117	168	158	16.5689	14.5646	14.3609	4.14958	5.86722	5.80112	2.01e-17	-3.17583
Solyc07g054490.3	1031	1446	2054	259	568	576	20.4415	28.4339	34.252	5.16668	11.0878	11.8496	8.72e-07	-3.16869
Solyc10g044840.2	747	846	1088	190	423	243	17.1207	19.2347	20.9731	4.39701	9.55111	5.7615	6.87e-09	-3.16842
Solyc11g066660.3	4802	4270	4221	943	1750	1614	66.4203	58.5746	49.0852	13.1523	23.8559	23.1643	1.29e-11	-3.16841
Solyc12g088250.2	1296	582	606	162	325	289	22.8468	10.1724	8.9787	2.87053	5.64337	5.27709	3.37e-05	-3.16701
Solyc10g084840.2	144	455	715	92	103	175	5.34907	16.8455	22.4313	3.44159	3.77523	6.78176	0.000748487	-3.16694
Solyc10g006860.4	41	53	107	8	15	31	1.00451	1.27788	2.19563	0.174895	0.350078	0.783747	0.00351686	-3.16662
Solyc06g069380.4	425	579	1073	141	232	261	4.76109	6.43527	10.1185	1.5904	2.56518	3.03396	3.23e-06	-3.16542
Solyc03g113090.3	57	194	363	35	61	71	1.10574	3.7337	5.92665	0.672003	1.16801	1.41468	0.0025873	-3.16337
Solyc11g005980.3	161	45	53	25	16	31	0.763391	0.21136	0.210747	0.118562	0.072209	0.150798	0.00431387	-3.16237
Solyc00g500080.1	95	61	103	31	3	31	6.44747	4.08955	5.92332	2.09069	0.186783	2.19569	0.010237	-3.16188
Solyc01g009080.4	808	837	1229	176	358	373	29.3217	30.1517	37.5328	6.41627	12.8073	14.0464	4.95e-08	-3.15963
Solyc07g009380.4	7205	5305	5258	825	2479	2279	157.399	114.938	96.573	18.1733	53.372	51.6607	1.09e-05	-3.15813
Solyc01g008920.4	2993	2290	2995	436	1048	1128	57.8178	43.863	48.649	8.48106	19.9546	22.598	9.37e-07	-3.15666
Solyc06g069790.4	183	1271	1231	264	169	301	8.87412	61.3742	50.3765	12.9469	8.08741	15.2099	0.00242958	-3.15648
Solyc08g081390.4	1130	1269	1622	147	677	405	23.1611	25.7896	27.9465	3.02855	13.6621	8.60112	0.000117666	-3.15467
Solyc02g090100.1	2533	2790	3926	717	1102	1160	142.801	155.975	186.081	40.785	61.1916	67.8252	8.44e-13	-3.15298
Solyc05g008300.3	217	422	678	81	148	166	7.33023	14.182	19.3056	2.74357	4.9346	5.81029	5.85e-05	-3.15084
Solyc05g055330.3	4594	5035	6006	1491	2111	1555	25.8944	28.1448	28.462	8.48013	11.7249	9.0918	1.93e-27	-3.15043
Solyc05g052040.1	9114	2290	5000	1589	1605	1856	228.865	57.0057	105.552	40.2432	39.7155	48.3503	0.000111159	-3.14874
Solyc02g085930.3	59	47	120	25	21	21	1.32684	1.03641	2.27097	0.55465	0.44862	0.483737	0.000201976	-3.14547
Solyc01g106400.3	447	356	622	98	167	187	16.2882	12.842	19.0459	3.59321	5.99235	7.06384	7.13e-08	-3.14404
Solyc09g092720.3	793	2067	1708	258	825	310	22.5364	58.3035	40.8468	7.39492	23.1173	9.13934	0.000229083	-3.14217
Solyc03g044330.1	19434	17386	16172	4476	7286	5797	270.615	240.096	189.335	62.8819	99.9939	83.767	8.94e-16	-3.14165
Solyc04g078610.4	8446	11577	13569	2358	4004	4430	65.7989	89.4494	88.8789	18.5315	30.741	35.8127	3.67e-10	-3.14109
Solyc01g095610.4	825	674	784	233	218	296	12.7989	10.369	10.215	3.63497	3.32659	4.76504	8.18e-15	-3.13713
Solyc08g005450.3	6192	5874	4854	2096	1898	1614	173.482	163.222	114.328	59.2523	52.3989	46.9305	1.07e-17	-3.13677
Solyc03g034070.1	565	650	1471	149	327	339	42.2043	48.1588	92.4	11.2054	24.0815	26.2823	5.08e-05	-3.13412
Solyc05g010685.1	938	798	1250	212	359	392	14.4433	12.182	16.1832	3.29068	5.44994	6.2608	1.65e-09	-3.13165
Solyc10g086400.2	5362	5363	4636	1509	2081	1545	100.364	99.5425	72.9563	28.489	38.3779	30.0012	2.27e-21	-3.13134
Solyc12g056390.1	32	94	100	18	13	32	1.26655	3.73685	3.37369	0.713699	0.501441	1.29873	0.00241284	-3.13132
Solyc02g077750.4	1436	1056	703	323	383	339	125.617	91.606	51.6974	28.4595	33.0193	30.7812	6.15e-08	-3.12993
Solyc11g044910.2	4926	4442	3712	696	1721	1780	52.1338	46.6187	33.0308	7.43089	17.9454	19.5469	1.88e-06	-3.12923
Solyc01g094790.3	2015	1871	1387	263	770	652	34.5422	31.8169	19.9862	4.53404	13.0137	11.5844	1.01e-05	-3.12886
Solyc12g094640.3	10873	13079	21618	1719	7389	4842	208.328	248.532	348.237	33.2261	139.539	96.2656	0.000151524	-3.12634
Solyc09g065485.1	48	85	50	8	14	30	6.07441	10.7303	5.27156	0.953993	1.69435	3.89274	0.00282673	-3.1255
Solyc07g018140.3	1020	1122	1351	180	569	368	19.5025	21.29	21.7309	3.46192	10.7205	7.29131	3.24e-06	-3.12233
Solyc10g006700.1	1316	189	689	290	122	209	98.3329	13.9999	43.2645	21.7971	8.95842	16.1544	0.00413472	-3.12162
Solyc02g081150.1	1605	1756	1886	435	643	662	42.1215	45.7183	41.6275	11.5247	16.6227	18.0344	5.05e-18	-3.11937
Solyc06g050900.3	1246	1948	2600	358	894	593	17.9327	27.8062	31.4639	5.19272	12.6799	8.85993	1.54e-06	-3.11696
Solyc10g079460.1	181	143	143	35	60	57	3.35744	2.62657	2.22508	0.647498	1.09024	1.08272	1.51e-07	-3.11418
Solyc04g009130.4	353	307	288	71	86	147	4.16246	3.59082	2.85821	0.844173	1.00129	1.79833	9e-07	-3.11253
Solyc02g081980.3	696	2759	2670	163	776	793	10.831	42.6181	34.9626	2.55898	11.9002	12.8139	0.00340746	-3.11066
Solyc02g065590.3	303	232	256	84	96	83	8.39463	6.36001	5.94245	2.32906	2.59516	2.3589	6.33e-13	-3.10982
Solyc10g018260.1	200	243	400	82	93	96	4.21173	5.07411	7.08218	1.74017	1.92966	2.08237	1.01e-08	-3.10889
Solyc06g084090.4	46	122	274	30	30	60	1.34612	3.60741	6.86819	0.889555	0.87452	1.86026	0.00443783	-3.10807
Solyc09g014350.3	1502	2838	3140	530	1082	798	21.8246	40.9048	38.3632	7.75915	15.4899	12.0234	1.99e-07	-3.10671
Solyc02g084240.3	8598	6525	4757	1834	2877	1911	228.376	171.886	106.226	49.1341	75.3187	52.6616	1.37e-08	-3.10636
Solyc05g052890.3	259	216	240	50	90	94	9.49965	7.84453	7.38631	1.83179	3.24046	3.56332	3.14e-08	-3.104
Solyc10g075107.1	1845	10062	16179	2376	3252	2404	88.4555	478.464	652.223	114.925	153.666	119.592	0.00192019	-3.10298
Solyc06g060630.1	476	780	840	168	299	219	5.18961	8.43583	7.7049	1.84476	3.21301	2.47607	2.39e-09	-3.1017
Solyc11g012850.2	4153	5000	5536	990	1780	2040	52.3296	62.4804	58.6421	12.5866	22.1046	26.6686	1.34e-09	-3.10048
Solyc05g026490.3	2157	2607	3796	353	1112	1203	26.6708	31.9777	39.474	4.39465	13.5495	15.4339	6.18e-05	-3.09792
Solyc06g049040.4	1064	1049	1097	227	326	493	20.3523	19.8885	17.6325	4.37726	6.13919	9.77512	2.47e-08	-3.09773
Solanum_lycopersicum_newGene_2383	154	84	64	24	24	44	1.99543	1.08134	0.698429	0.3031	0.295481	0.585905	0.000873371	-3.09749
Solyc10g006530.4	761	732	1042	98	316	374	30.5936	29.2044	35.2529	3.94804	12.5016	15.5987	0.000116523	-3.09606
Solyc03g121720.2	2094	2329	3652	427	969	1164	42.233	46.5692	61.9217	8.6815	19.248	24.3444	5.81e-06	-3.09507
Solyc06g034390.1	104	282	342	50	80	92	2.74981	7.38159	7.61511	1.31258	2.0732	2.51605	0.000199926	-3.09
Solyc11g008480.2	712	713	819	146	277	314	15.0107	14.9069	14.5193	3.10369	5.74975	6.86238	1.39e-08	-3.08957
Solyc10g086170.1	1357	1478	1968	207	510	782	29.2054	31.5313	35.5983	4.47934	10.8185	17.4573	7.7e-05	-3.08557
Solyc12g010050.2	373	576	742	87	252	198	8.99792	13.8128	15.085	2.10237	5.997	4.96406	2.36e-05	-3.08487
Solyc01g008420.3	98	161	432	50	92	62	1.37072	2.23919	5.11309	0.701213	1.2716	0.900801	0.00105489	-3.08374
Solyc05g054130.4	5795	5207	3909	1638	1731	1680	111.642	99.4866	63.3078	31.8396	32.8636	33.5799	2.34e-14	-3.08262
Solyc01g111630.3	22133	21717	27707	3802	10633	8959	383.799	373.486	403.944	66.5109	181.731	161.22	9.37e-07	-3.07975
Solyc02g076690.3	26140	23058	24076	3546	11023	9336	368.467	322.338	285.328	50.4315	153.146	136.563	6.12e-06	-3.07974
Solyc07g005510.3	3326	5416	7602	1138	2010	2125	47.4322	76.6158	91.1648	16.3691	28.2467	31.4503	3.68e-07	-3.07837
Solyc06g150130.1	6702	6612	8770	2019	2559	2853	139.451	136.455	153.432	42.3818	52.4869	61.5936	1.32e-19	-3.07655
Solyc05g013960.3	2647	2488	2931	701	1167	881	23.4169	21.8308	21.7984	6.25067	10.1759	8.08726	1.81e-17	-3.06658
Solyc07g052610.3	484	578	1000	96	288	266	14.8478	17.59	25.8237	2.94671	8.72545	8.48094	8.42e-05	-3.06493
Solyc08g005240.3	432	493	782	98	187	260	5.23558	5.92726	7.97322	1.19738	2.22624	3.27478	1.48e-05	-3.05963
Solyc10g075100.2	2012	10870	17418	2647	3612	2595	70.2837	376.715	511.724	93.306	124.388	94.0853	0.00217612	-3.05863
Solyc09g064720.3	5984	4872	5403	1313	2163	2057	142.353	114.929	108.059	31.5062	50.6967	50.7684	4.96e-13	-3.05823
Solyc01g096360.3	3042	4169	5439	729	1608	1779	40.2006	54.6388	60.4321	9.71005	20.9433	24.3916	1.6e-06	-3.05778
Solyc12g009800.3	1110	1026	1427	224	505	455	17.2288	15.8022	18.6336	3.50595	7.73132	7.33238	6.92e-08	-3.05678
Solyc04g009020.4	2526	2746	3455	470	1249	1150	24.5256	26.4447	28.2106	4.59656	11.9555	11.586	1.34e-06	-3.05675
Solyc06g066620.4	3391	3704	5100	837	1619	1614	91.3779	98.9839	115.557	22.7427	42.9964	45.1241	4.16e-09	-3.05013
Solyc04g079700.3	915	779	666	89	402	269	16.304	13.7669	9.98399	1.58709	7.05506	4.96274	0.000330284	-3.04781
Solyc07g042260.4	2311	2827	3609	787	1272	916	17.5383	21.281	23.0318	6.02461	9.5168	7.21119	1.96e-14	-3.04632
Solyc08g077970.2	150	162	247	77	68	38	5.07399	5.40189	7.01615	2.62207	2.2484	1.30883	1.91e-06	-3.04582
Solyc02g080540.1	21821	22060	39585	4701	11280	11185	530.553	531.925	809.189	115.325	270.307	282.205	4.58e-06	-3.04554
Solyc09g007830.3	717	839	1323	206	253	466	16.661	19.3571	25.8695	4.83185	5.79962	11.2284	6.57e-06	-3.04481
Solyc12g014040.1	240	442	531	73	168	151	8.71294	15.9169	16.2022	2.6746	5.99202	5.67077	2.02e-05	-3.04186
Solyc09g007480.3	623	1028	935	143	397	311	25.0273	40.9376	31.5731	5.7876	15.6962	12.955	7.11e-06	-3.04183
Solyc01g096660.3	4961	6103	9755	1418	2779	2682	123.222	150.328	203.721	35.517	68.0268	69.1089	1.73e-07	-3.03923
Solyc04g053080.4	8809	8846	5407	2785	2591	2522	177.798	177.079	91.7502	56.7053	51.5344	52.8175	2.01e-10	-3.03663
Solyc05g015880.3	428	90	189	48	88	82	7.36962	1.52303	2.73989	0.81834	1.48716	1.45205	0.00286631	-3.0362
Solyc02g081270.4	45	141	297	33	42	62	0.369773	1.14892	2.05613	0.270729	0.336095	0.522942	0.00491045	-3.03601
Solyc02g079920.3	247	316	437	147	96	87	4.05235	5.13935	6.04062	2.4224	1.54522	1.4796	1.25e-07	-3.03569
Solyc04g081320.4	1743	2482	3523	487	965	1086	49.9009	70.4652	84.7896	14.0599	27.2071	32.2609	1.62e-06	-3.03556
Solyc02g077880.3	41539	42448	26203	9048	14944	13678	1378.24	1396.78	730.942	302.897	488.706	470.944	1.16e-08	-3.0342
Solyc07g039190.4	2817	3319	4526	691	1423	1444	35.1689	41.0992	47.5089	8.7014	17.5081	18.711	7.23e-08	-3.0325
Solyc02g091560.3	65270	57681	77145	7179	34055	23429	923.834	809.675	918.013	102.52	475.104	344.119	0.000226238	-3.03047
Solyc10g018300.3	34322	34701	51543	6000	16584	16962	382.966	384.002	483.538	67.5446	182.385	196.409	1.04e-05	-3.02938
Solyc04g070980.4	2248	3104	3925	692	1385	1054	22.8797	31.3337	33.5908	7.10791	13.897	11.1333	4.39e-09	-3.02853
Solyc10g086570.3	6788	6785	6195	389	1822	3672	298.463	295.893	229.012	17.2282	78.9626	167.53	0.0042239	-3.02513
Solyc08g077880.3	7831	9956	16090	2334	4165	4692	173.006	218.14	298.859	52.0102	90.6844	107.562	4.28e-07	-3.02484
Solyc07g005960.3	480	681	1098	147	257	328	7.74304	10.894	14.8905	2.38003	4.07317	5.47911	1.17e-05	-3.02439
Solyc12g039070.2	119	517	860	155	97	180	3.23219	14.035	19.7748	4.27255	2.61314	5.11335	0.00353638	-3.02366
Solyc07g063350.3	118	206	284	37	55	98	0.846867	1.47132	1.7174	0.268669	0.389159	0.731347	0.000315014	-3.02282
Solyc11g056680.1	2080	3617	3705	492	1541	1063	52.3665	90.3047	78.4269	12.4952	38.2331	27.7539	2.25e-05	-3.02273
Solyc08g078030.4	213	413	596	115	96	177	4.26556	8.22165	10.0749	2.33231	1.89385	3.6834	5.69e-05	-3.02067
Solyc04g054370.1	553	678	871	125	229	335	30.5879	37.1804	40.5276	6.93222	12.4456	19.2245	7.08e-06	-3.02007
Solyc12g014390.3	3147	2660	3485	601	905	1569	95.452	80.0034	88.8712	18.3847	27.0326	49.3695	3.04e-06	-3.01717
Solyc10g055390.2	566	311	746	104	209	218	7.63045	4.15877	8.46412	1.40627	2.77621	3.04427	3.22e-05	-3.01573
Solyc01g111560.3	2127	2821	3596	751	1120	1052	46.1634	60.731	65.6199	16.4439	23.9514	23.694	4.09e-13	-3.01472
Solyc06g068750.3	714	799	909	106	330	356	19.2693	21.3974	20.616	2.87459	8.76116	9.95367	6.31e-05	-3.01458
Solyc09g014380.3	3566	4703	5115	1171	1837	1614	41.7628	54.6219	50.3678	13.8388	21.1984	19.6126	8.51e-16	-3.01432
Solyc09g018890.3	1979	2110	3130	403	1023	976	61.7045	65.2488	82.0719	12.6751	31.4394	31.572	3.23e-06	-3.01202
Solyc05g006820.4	1028	1291	1528	428	468	438	20.7795	25.8972	25.9788	8.73487	9.31813	9.1758	3.26e-25	-3.01126
Solyc04g082930.3	142	179	223	36	81	65	22.1098	27.5796	29.1	5.54434	12.3611	10.3846	2.26e-06	-3.00904
Solyc01g100490.4	998	183	89	42	204	103	22.2722	4.05145	1.65239	0.945937	4.4684	2.38269	0.0257401	-3.00802
Solyc10g054080.3	2224	2874	3971	671	1137	1255	17.1314	21.96	25.7228	5.21147	8.63593	10.0346	1.56e-08	-3.00454
Solyc06g007620.3	1315	1026	887	236	423	448	29.8091	23.0673	16.899	5.391	9.43514	10.5399	1.89e-07	-3.00422
Solyc01g106690.3	2383	1807	2095	509	832	837	37.3737	28.106	27.6147	8.04044	12.8503	13.6214	7.08e-11	-3.00324
Solyc02g085290.3	601	706	981	136	323	307	16.8122	19.5845	23.0847	3.81719	8.88446	8.8928	2.21e-06	-3.0013
Solyc10g075160.1	3940	5603	5683	828	2412	1885	249.729	352.186	302.802	52.9346	150.683	123.931	4.6e-06	-2.99986
Solyc07g016160.3	35	53	54	15	0	17	1.99348	3.05649	2.63048	0.861612	0	1.00803	0.0412416	-2.99698
Solyc10g079700.2	284	382	318	117	105	119	8.32032	11.0784	7.81323	3.44191	3.02372	3.59265	1.68e-13	-2.99665
Solyc09g098490.4	80	87	153	30	51	24	0.651176	0.70494	1.05258	0.244098	0.412181	0.201027	7.56e-05	-2.99611
Solyc04g008260.3	1106	1046	1431	366	428	456	24.6352	23.1103	26.8015	8.23099	9.39081	10.5258	6.03e-21	-2.99361
Solyc03g118140.3	87	88	110	36	36	25	3.80247	3.83212	4.06234	1.57641	1.53431	1.13477	1.36e-07	-2.99333
Solyc08g075990.3	955	1138	1758	253	498	540	21.8071	25.7609	33.7513	5.82336	11.2115	12.7954	9.85e-07	-2.99326
Solyc12g070270.2	1870	1896	2408	525	760	862	32.4821	32.6687	35.1646	9.19779	12.9995	15.5314	2.77e-13	-2.98327
Solyc02g065780.1	282	254	341	82	117	107	26.6305	23.7927	27.1456	7.77656	10.91	10.5195	4e-13	-2.98287
Solyc02g070540.3	600	1344	2118	348	377	581	10.4408	23.2011	30.9818	6.1085	6.45792	10.4855	0.0001	-2.98091
Solyc06g019200.4	4597	3833	4701	679	1971	1807	85.6364	70.8077	73.6309	12.7466	36.1827	34.9241	9.42e-06	-2.98069
Solyc02g088610.4	2572	2311	3110	605	1246	934	20.6576	18.4122	21.0051	4.8992	9.86308	7.7789	6.23e-10	-2.98001
Solanum_lycopersicum_newGene_1566	66	45	40	12	12	24	1.81435	1.22136	0.929573	0.310242	0.312697	0.67778	0.00160831	-2.9766
Solyc08g082170.4	5784	7010	7625	1436	2588	3012	80.6158	96.8981	89.3598	20.1849	35.5546	43.5589	9.2e-09	-2.97644
Solyc08g067430.4	650	700	810	231	276	259	20.8839	22.3005	21.8645	7.48232	8.71322	8.6106	2.39e-30	-2.97137
Solyc08g075680.4	299	520	642	169	141	185	5.27973	9.12608	9.5434	3.00158	2.45376	3.38432	1.25e-07	-2.96793
Solyc07g056140.3	8440	10587	16898	2003	5257	4793	119.578	148.756	201.285	28.6226	73.4052	70.4601	1.52e-05	-2.96699
Solyc01g008790.4	1214	1418	2168	211	626	741	17.557	20.3369	26.362	3.07022	8.92427	11.1171	0.000170783	-2.96262
Solyc03g119910.4	589	581	506	98	108	333	11.6904	11.4501	8.44616	1.95718	2.09733	6.84972	0.000760085	-2.96253
Solyc06g068990.4	660	391	595	97	224	238	9.09621	5.3451	6.89737	1.33693	3.03988	3.40563	2.69e-05	-2.96236
Solyc01g066740.3	2320	2692	2357	356	830	1279	14.4603	16.6466	12.3541	2.23462	5.10036	8.27167	8.93e-05	-2.95791
Solyc04g050470.4	3376	3160	4222	752	1556	1445	70.3537	65.3028	73.9708	15.8112	31.9455	31.2491	1.05e-08	-2.9575
Solyc01g112060.4	1861	2651	5059	763	1497	962	38.2173	54.0168	87.3742	15.8061	30.313	20.4987	1.1e-05	-2.9567
Solyc06g060360.3	53	67	108	22	32	22	1.39089	1.72332	2.36766	0.572353	0.809943	0.587361	6.47e-05	-2.95598
Solyc02g090480.4	60	122	270	34	45	60	0.962617	1.9326	3.63061	0.537351	0.698454	0.985123	0.00228965	-2.95593
Solyc06g069030.3	2086	2323	3473	612	976	1135	50.3906	55.6694	70.5494	14.918	23.2378	28.4406	1.15e-08	-2.95436
Solyc05g015980.3	1039	1159	1353	398	248	560	19.1367	21.1844	20.9572	7.38912	4.49955	10.6985	7.93e-07	-2.95333
Solyc12g006973.1	589	861	1469	219	388	378	13.331	19.3284	27.9575	4.99023	8.65599	8.87292	5.53e-06	-2.95119
Solyc07g063080.4	34	47	72	18	18	14	0.337953	0.462825	0.60157	0.180479	0.174779	0.137455	0.000338471	-2.95112
Solyc07g065500.2	5773	4780	6549	1268	2406	2332	289.919	238.034	276.521	64.2095	119.06	121.532	2.31e-09	-2.95068
Solyc01g099560.3	113	120	146	7	52	56	3.18655	3.3459	3.45474	0.192566	1.42263	1.62032	0.0078832	-2.94952
Solyc03g115950.3	60	47	129	22	18	34	2.71551	2.11123	4.89549	0.961281	0.787678	1.58885	0.00162864	-2.94744
Solyc02g090890.4	15830	14912	21219	3028	9705	5196	172.712	161.357	194.641	33.3369	104.368	58.8221	1.34e-05	-2.94705
Solyc03g114730.3	541	1181	2073	351	441	456	5.12028	11.0981	16.5185	3.34958	4.11988	4.47747	7.79e-05	-2.94694
Solyc03g116160.1	3060	3218	3211	547	1511	1248	62.4803	65.1651	55.1275	11.2557	30.4105	26.4356	2.21e-06	-2.94306
Solyc04g007500.1	1168	907	1058	291	383	440	65.4091	50.3799	49.8175	16.4492	21.1007	25.5374	3.12e-12	-2.94264
Solyc12g008980.3	4702	5506	7550	725	1686	3338	66.9905	77.8014	90.4457	10.4176	23.6791	49.3526	0.000645461	-2.94254
Solyc11g066950.2	104	72	164	28	37	48	4.88803	3.38443	6.53088	1.31269	1.69089	2.34155	0.000115254	-2.94216
Solyc01g056780.3	2452	2955	5444	547	1283	1741	96.7197	115.592	180.525	21.7459	49.85	71.2529	0.000183666	-2.94187
Solyc04g078520.3	395	569	915	84	278	255	7.56565	10.8105	14.7478	1.60967	5.24831	5.06321	0.000412876	-2.94109
Solyc03g007030.3	900	999	1887	232	554	494	37.1202	40.8585	65.4504	9.66219	22.5201	21.1503	2.22e-05	-2.94078
Solyc06g066530.1	893	435	606	40	336	233	42.7185	20.6383	24.3877	1.92721	15.8062	11.5365	0.00691736	-2.93916
Solyc06g051990.4	186	300	386	53	103	135	3.37697	5.39299	5.89244	0.953888	1.83947	2.54329	7.99e-05	-2.93915
Solyc10g079360.3	363	261	422	83	181	101	10.5063	7.48075	10.2742	2.41209	5.14853	3.01823	2.23e-06	-2.93858
Solyc05g010700.1	159	151	208	48	55	77	28.6235	26.8729	31.4173	8.5864	9.74338	14.2889	7.58e-08	-2.9366
Solyc08g069020.1	158	172	205	34	98	52	3.44024	3.71727	3.76086	0.746452	2.09094	1.17335	4.15e-05	-2.93536
Solyc09g091960.3	261	193	228	61	99	82	4.45538	3.25437	3.26297	1.04707	1.65216	1.44747	1.01e-08	-2.93473
Solyc07g063590.4	1426	1615	1623	399	670	601	10.4452	11.7308	9.99097	2.94752	4.83699	4.56673	5.12e-14	-2.9345
Solyc02g086180.4	525	1960	2282	211	594	691	11.6901	43.3137	42.7467	4.73524	13.0455	15.9652	0.00270192	-2.93316
Solyc01g110000.3	5652	7396	6699	450	1204	4278	54.8853	71.229	54.6952	4.40233	11.5253	43.1079	0.0082924	-2.93184
Solyc04g008210.2	1746	1378	874	382	471	560	48.4676	37.9344	20.3921	10.6761	12.8865	16.1321	1.33e-06	-2.92738
Solyc05g055160.3	89343	77849	53464	25567	31268	22746	1514.06	1308.38	761.738	437.181	522.276	400.012	8.22e-10	-2.92704
Solyc04g074420.1	91	36	194	39	18	38	9.22957	3.60275	16.5937	3.94787	1.77756	3.92948	0.00844867	-2.92672
Solyc01g110940.3	107	137	134	32	55	46	3.52298	4.49829	3.72125	1.06135	1.79447	1.55134	1.16e-07	-2.92661
Solyc08g079550.1	354	418	538	72	169	205	3.94972	4.63126	5.05725	0.805304	1.86189	2.37411	3.56e-05	-2.92651
Solyc04g077500.4	3389	2893	2487	914	1202	1061	68.9016	58.3289	42.5106	18.7469	24.0762	22.3834	2.67e-14	-2.92579
Solyc02g080480.3	470	354	558	96	206	182	6.9549	5.18963	6.94312	1.43014	2.9999	2.78612	9.67e-07	-2.92403
Solyc02g070210.3	24	124	208	26	18	54	0.363448	1.92399	2.74174	0.409549	0.275025	0.878592	0.0187673	-2.92344
Solyc06g068230.4	19192	19717	24137	4427	8302	9490	92.7843	94.5357	98.1103	21.5933	39.5599	47.6096	2.56e-08	-2.92252
Solyc08g042100.3	136	366	569	90	96	157	1.93044	5.17127	6.8201	1.29247	1.33739	2.31673	0.000974255	-2.92031
Solyc01g010640.3	1935	2042	2882	659	953	852	55.9753	58.5908	70.0988	19.2382	27.1705	25.5801	1.6e-15	-2.91362
Solyc08g080320.3	2204	2415	1925	588	942	842	60.3286	65.562	44.3026	16.2401	25.4136	23.9137	2.03e-12	-2.91224
Solyc05g046270.3	175	147	136	54	56	54	7.554	6.25757	4.90873	2.32658	2.35134	2.41937	8.07e-09	-2.91056
Solyc08g066420.1	369	449	487	187	108	164	19.9339	24.0512	22.1191	10.196	5.75224	9.20058	1.36e-08	-2.90861
Solyc07g006580.3	844	944	1042	291	368	369	13.1147	14.5406	13.6127	4.56337	5.63185	5.94448	1.94e-24	-2.90836
Solyc02g084440.4	95914	67001	69448	11874	39643	29922	1895.73	1313.34	1154.03	236.805	772.29	613.715	7.42e-05	-2.90658
Solyc09g008650.3	2514	1969	2972	362	1191	1025	67.3609	52.302	66.9323	9.77914	31.4444	28.4943	7.15e-05	-2.90625
Solyc09g091690.1	1190	1110	1221	313	543	424	28.1154	26.008	24.2413	7.4596	12.6303	10.3776	2.06e-13	-2.90533
Solyc01g109500.4	921	1008	534	139	374	345	17.1815	18.6538	8.3768	2.60005	6.87241	6.66565	0.00016143	-2.90262
Solyc05g041430.3	642	735	976	155	311	358	20.2266	22.9693	25.8322	4.92091	9.65629	11.7052	1.64e-06	-2.90124
Solyc04g015470.3	687	955	1681	287	466	403	8.04256	11.0958	16.5552	3.39148	5.37876	4.89959	1.58e-06	-2.89927
Solyc09g047900.2	1563	1630	2275	459	831	676	33.5433	34.7062	41.0712	9.92637	17.578	15.0483	1.17e-10	-2.89898
Solyc06g051130.1	289	230	290	55	123	109	6.09238	4.81197	5.1413	1.16956	2.54247	2.38388	2.34e-06	-2.89731
Solyc02g089065.1	11799	14544	14192	3756	5973	5069	451.806	552.345	456.899	145.101	225.44	201.439	7.93e-17	-2.89573
Solyc08g006160.4	3544	3539	4823	981	1818	1500	94.4042	93.493	108.022	26.358	47.719	41.4439	6.62e-11	-2.89408
Solyc08g069180.3	447	298	563	103	171	187	4.99122	3.29349	5.2877	1.15452	1.88202	2.16944	1.77e-06	-2.89147
Solyc01g086820.4	40	241	497	60	65	99	1.50032	9.02501	15.8235	2.29067	2.39351	3.85461	0.0153707	-2.89139
Solyc03g026210.4	2305	2273	2883	394	1042	1168	52.0414	50.8842	54.7313	8.9669	23.1724	27.3538	2.48e-05	-2.89123
Solyc05g050770.4	1562	1117	1897	192	791	586	25.4684	18.0725	26.007	3.14951	12.7062	9.90598	0.000421474	-2.88899
Solyc06g065490.3	1793	1801	2977	284	808	1120	47.6656	47.4764	66.5291	7.61789	21.1658	30.8981	0.000419101	-2.88842
Solyc07g006710.2	65	136	160	22	39	58	3.2612	6.80814	6.78933	1.11149	1.89872	3.0087	0.00110661	-2.88615
Solyc01g109430.3	51	108	265	35	58	41	1.33522	2.80348	5.81717	0.920339	1.47251	1.11027	0.00429561	-2.8824
Solyc05g054350.3	8059	6098	6632	956	2771	3486	161.716	121.343	111.88	19.3569	54.8001	72.5923	0.000201003	-2.88235
Solyc03g095860.3	1257	1461	1486	218	547	701	21.5535	24.8381	21.417	3.75852	9.24258	12.4621	5.33e-05	-2.88051
Solyc03g082560.3	1765	1705	2127	361	737	891	36.2611	34.7277	36.724	7.4834	14.9229	18.9947	1.54e-06	-2.8787
Solyc03g093360.3	89	219	256	18	73	87	2.67362	6.58602	6.51914	0.533342	2.16656	2.71905	0.00632005	-2.87823
Solyc11g010960.2	1359	3028	4244	857	1361	778	25.0563	55.3834	65.7929	15.9322	24.7315	14.8729	3.37e-05	-2.87706
Solyc08g067240.4	552	864	1026	224	310	340	6.69566	10.3902	10.4605	2.73955	3.70387	4.27289	8.21e-09	-2.87466
Solyc09g090570.2	3144	4672	6150	1396	2196	1454	118.07	174.032	194.208	52.8824	81.2805	56.6464	2.28e-09	-2.87042
Solyc01g107660.3	2530	2780	4541	604	1259	1576	84.7552	92.3567	127.877	20.3934	41.5515	54.7877	2.05e-05	-2.86942
Solyc12g062250.2	2522	2955	3916	608	1416	1328	39.3221	45.6999	51.3409	9.55741	21.7554	21.4768	1.34e-06	-2.86889
Solyc02g071380.2	3087	2802	2183	510	1418	991	60.5232	54.4867	35.9808	10.078	27.3972	20.1582	1.4e-05	-2.8665
Solyc07g042440.3	2588	3564	7735	645	1915	2063	59.4527	81.2011	149.409	14.9309	43.359	49.1694	0.00100926	-2.86646
Solyc02g063380.1	33	82	88	6	19	36	2.87219	7.05176	6.45934	0.466926	1.60835	3.26881	0.0151113	-2.8636
Solyc02g043940.1	110	99	94	35	45	30	12.9032	11.5128	9.22557	4.12563	5.18681	3.62835	5.51e-07	-2.8614
Solyc04g051580.4	886	1056	1414	281	387	534	19.0227	22.4842	25.5223	6.07084	8.18379	11.886	6.41e-08	-2.86086
Solyc06g072810.4	39	90	217	12	45	46	0.433308	0.990074	2.0424	0.125028	0.48861	0.535082	0.0161505	-2.85923
Solyc01g150152.1	134	399	271	76	105	99	4.20133	12.4304	7.15309	2.38664	3.22883	3.22196	0.000131694	-2.85791
Solyc05g009100.4	319	477	704	107	227	195	4.08994	6.05893	7.58667	1.38395	2.86496	2.58566	1.59e-05	-2.85683
Solyc01g103100.3	1467	1936	3439	511	855	1030	32.5754	42.6538	64.2368	11.4504	18.7121	23.7369	1.26e-05	-2.85607
Solyc02g078720.4	112	197	208	28	47	97	3.53886	6.20402	5.53357	0.866689	1.4615	3.19509	0.00159319	-2.85446
Solyc12g055720.2	2040	2394	2768	697	964	997	22.4156	26.0892	25.5662	7.72275	10.4358	11.3642	1.24e-16	-2.854
Solyc08g076880.3	4209	2666	3661	726	1832	1273	165.055	103.691	120.7	28.6931	70.8082	51.7735	5.15e-06	-2.85381
Solyc12g042250.3	362	385	456	116	143	181	16.4293	17.3448	17.4106	5.30287	6.39386	8.51677	2.98e-11	-2.85334
Solyc06g074890.1	2278	2461	3612	522	1150	1299	94.7309	101.477	126.265	21.8922	47.1285	56.0402	7.03e-06	-2.85163
Solyc01g091170.3	478	2302	298	251	364	363	7.19167	34.3476	3.7623	3.80593	5.39877	5.66676	0.0120305	-2.85156
Solyc04g079970.3	34208	32333	20823	10253	12528	9737	929.228	871.068	475.567	281.034	335.434	274.466	1.38e-09	-2.85016
Solyc08g082650.2	306	472	796	112	176	253	12.1778	18.6206	26.6423	4.46667	6.90425	10.4266	0.000147898	-2.84943
Solyc06g050760.1	818	597	536	93	340	259	64.7785	46.8873	35.6963	7.4094	26.5327	21.2803	0.000456139	-2.84611
Solyc07g053640.1	1881	2821	3325	1244	891	771	35.4226	52.6848	52.6342	23.6217	16.5251	15.066	7.09e-09	-2.8451
Solyc04g081330.4	4410	4123	4988	959	2082	1913	112.052	103.903	106.561	24.5787	52.1401	50.424	7.6e-08	-2.8433
Solyc05g012370.3	987	1055	1691	180	663	467	18.4164	19.5297	26.5302	3.37254	12.182	9.04152	0.000257845	-2.84146
Solyc03g116740.3	38	246	358	53	50	90	0.734486	4.72611	5.82141	1.0323	0.947996	1.7947	0.0144368	-2.8409
Solyc12g100060.1	6784	6361	4576	2418	2125	2065	387.268	360.114	219.574	139.259	119.519	122.314	3.51e-11	-2.83962
Solyc02g083570.3	1490	1018	2124	482	607	598	37.2293	25.2234	44.6251	12.151	14.9414	15.4898	1.43e-08	-2.83888
Solyc07g005390.3	5421	9504	12511	2097	4474	3271	57.3337	99.6792	111.238	22.3777	46.6352	35.8942	5.05e-06	-2.83798
Solyc06g007370.1	344	349	385	34	185	150	19.7502	19.8595	18.5861	1.91348	10.4268	8.90929	0.002339	-2.83499
Solyc03g025320.4	11071	14916	18956	5606	6601	4430	187.497	250.528	269.911	95.8018	110.184	77.8549	5.53e-13	-2.83361
Solyc04g079210.3	4649	3154	1422	670	1517	1120	141.326	95.0803	36.3302	20.5343	45.4321	35.3039	0.000745312	-2.8336
Solyc10g008200.4	173	352	701	73	184	153	3.17982	6.4333	10.8625	1.34882	3.3432	2.92028	0.00193572	-2.83217
Solyc02g092790.3	538	594	1870	244	358	411	14.36	15.732	41.9925	6.56993	9.41706	11.3695	0.000726191	-2.83204
Solyc02g079520.3	75	117	427	69	54	71	5.91747	9.18058	28.4738	5.50438	4.21114	5.83195	0.00720327	-2.83202
Solyc04g071560.4	724	825	1343	265	323	452	22.0424	24.902	34.3802	8.13722	9.69695	14.26	3.51e-07	-2.83151
Solyc01g088250.4	1741	1287	1809	362	723	694	23.8606	17.4966	20.8472	4.99662	9.76318	9.86477	2.05e-07	-2.82983
Solyc05g052710.3	2429	2821	4425	662	1158	1621	109.752	126.451	168.148	30.1877	51.5611	76.0234	1.31e-05	-2.82962
Solyc06g068690.4	42	36	48	13	13	18	0.544234	0.463596	0.524256	0.171905	0.163234	0.236481	0.000391904	-2.82885
Solyc03g118410.3	3266	4750	6197	744	2126	2157	121.988	175.979	194.645	28.0298	78.2833	83.6267	0.000109861	-2.82673
Solyc12g098890.2	3352	3669	5587	784	1615	2099	136.077	147.721	190.707	32.1049	64.6092	88.423	2.12e-05	-2.82509
Solyc02g067050.3	110	122	196	56	30	63	2.59421	2.85507	3.8867	1.32804	0.685457	1.53222	0.000150591	-2.82225
Solyc07g025140.4	85	95	106	37	41	27	1.53784	1.70889	1.61255	0.677413	0.726153	0.511239	3.54e-07	-2.82174
Solyc06g082860.4	121	154	242	20	79	76	2.50398	3.16052	4.20412	0.414318	1.60099	1.62233	0.00256166	-2.81995
Solyc01g006790.3	331	273	263	40	154	115	12.465	10.183	8.326	1.51703	5.70044	4.45686	0.000653981	-2.81838
Solyc04g071960.3	1070	1209	1799	186	571	672	30.0208	33.6542	42.466	5.2475	15.7885	19.565	0.000400081	-2.81619
Solyc01g079580.3	779	1087	1018	327	288	448	9.86931	13.6622	10.841	4.17425	3.589	5.88497	1.17e-09	-2.8161
Solyc00g500079.1	34	39	77	17	4	24	2.16501	2.47981	4.14398	1.09549	0.203983	1.5516	0.0187135	-2.81573
Solyc05g051290.4	1299	3351	3095	853	848	1075	32.9247	84.2893	65.9967	21.8128	21.196	28.2775	7.39e-06	-2.81548
Solyc08g061630.3	1776	1889	3339	366	1013	1093	41.6042	43.8765	65.7457	8.63995	23.3736	26.5657	0.000191952	-2.81419
Solyc08g067540.1	228	195	202	59	115	58	17.2776	14.6496	12.8427	4.48461	8.57927	4.51182	3.04e-06	-2.81385
Solyc04g080500.3	51	96	46	7	44	10	3.07773	5.80187	2.325	0.418868	2.66239	0.628333	0.0228665	-2.81253
Solyc08g005960.2	3186	2314	4924	401	1775	1446	213.709	153.929	277.682	27.1028	117.338	100.598	0.00138741	-2.81002
Solyc10g084340.2	95	81	188	36	51	42	1.88374	1.58281	3.13215	0.710119	0.994895	0.858588	0.000125344	-2.80929
Solyc03g120430.3	3478	4801	7926	1074	2414	2318	53.4204	73.1348	102.353	16.6373	36.5455	36.9425	3.15e-05	-2.80826
Solyc07g040950.3	2004	2476	2695	580	1109	992	56.7087	69.4888	64.1235	16.5664	30.9329	29.1406	2.06e-09	-2.80565
Solyc02g068070.4	16	80	103	33	14	12	0.271556	1.40797	1.5326	0.58057	0.229305	0.209564	0.0243301	-2.80189
Solyc05g006570.1	93	92	276	43	41	70	1.38759	1.35774	3.4902	0.652046	0.59692	1.08124	0.00238634	-2.80139
Solyc01g106580.3	1084	1690	2555	412	646	852	23.1883	35.8789	45.9774	8.89232	13.6177	18.9065	2.07e-05	-2.79935
Solyc07g056570.1	3005	3424	4228	1786	1109	1051	45.5726	51.4973	53.9053	27.3222	16.565	16.5355	4.78e-09	-2.79924
Solyc02g085220.4	313	249	410	99	128	135	2.37082	1.87058	2.61359	0.757201	0.951153	1.06231	4.48e-09	-2.79773
Solyc02g072140.1	227	336	399	99	121	136	4.55034	6.68746	6.74274	1.99639	2.3879	2.83414	1.25e-08	-2.79742
Solyc03g098440.4	1951	1940	2570	378	943	1034	44.8892	44.2633	49.727	8.77158	21.3776	24.6803	2.24e-05	-2.79739
Solyc09g092510.3	34	110	214	29	14	62	0.317708	1.04279	1.72712	0.273402	0.128124	0.617086	0.0239165	-2.796
Solyc02g088430.1	87	48	110	18	33	35	1.46028	0.797246	1.55666	0.292588	0.550637	0.611789	0.000956029	-2.7951
Solyc07g041340.2	1040	1258	1150	317	529	462	38.0769	45.6543	35.3938	11.6842	19.0705	17.538	2.91e-12	-2.79482
Solyc10g079170.2	259	377	501	75	168	168	2.66977	3.85581	4.34946	0.773403	1.7018	1.7998	4.49e-05	-2.79256
Solyc02g080220.3	11	314	359	62	71	56	0.119774	3.60837	3.49427	0.725009	0.81149	0.668273	0.0427121	-2.79255
Solyc04g009510.4	2962	3062	3153	955	1158	1374	27.165	27.8527	24.313	8.83286	10.4675	13.0752	5.29e-17	-2.79175
Solyc08g083350.4	3022	3151	4936	694	1594	1754	86.523	89.4716	118.805	20.0297	44.9612	52.1035	1.92e-05	-2.79116
Solyc04g015450.3	6120	5649	6964	1749	2722	2649	68.2323	62.4544	65.2717	19.6707	29.9042	30.6455	6.77e-14	-2.78844
Solyc10g084380.1	23	161	416	41	90	43	0.475316	3.38044	7.40684	0.874973	1.87193	0.940982	0.0328204	-2.78747
Solyc09g074470.3	32	93	240	9	28	65	0.713528	2.1132	4.61448	0.200146	0.613834	1.53379	0.0374851	-2.78732
Solyc04g076340.3	1081	787	1271	237	584	349	16.8462	12.1617	16.6515	3.71401	8.9693	5.63531	6.61e-06	-2.78527
Solyc01g005520.4	5280	5409	7993	1511	2814	2662	104.882	106.549	133.484	30.2826	55.0865	54.8704	2.08e-08	-2.78423
Solanum_lycopersicum_newGene_753	129	45	41	35	21	16	4.55273	1.57618	1.20225	1.22841	0.725643	0.586779	0.0122133	-2.78328
Solyc01g094727.1	42	193	149	52	48	29	0.783686	3.57423	2.33779	0.974035	0.871983	0.554947	0.00558761	-2.78313
Solyc05g051660.1	2160	2000	2807	628	1100	912	61.4527	56.4201	67.1432	18.0272	30.8235	26.9089	5.59e-11	-2.78306
Solanum_lycopersicum_newGene_865	162	87	105	13	48	60	2.32199	1.62074	1.72951	0.307402	1.09738	1.13118	0.00668619	-2.78288
Solyc03g115000.3	4579	4640	5324	1169	2293	2044	33.519	33.6848	32.7668	8.63222	16.5461	15.5235	2.06e-09	-2.78194
Solyc09g090410.3	2328	2345	3473	489	1097	1379	102.191	102.064	128.167	21.64	47.4498	62.8125	3.92e-05	-2.78099
Solyc10g081910.2	2086	2356	2134	516	1062	919	17.8146	19.9549	15.3199	4.44489	8.93473	8.14564	2.51e-08	-2.77505
Solyc10g007750.1	206	140	100	19	103	32	6.79055	4.58521	2.76654	0.633372	3.33	1.07932	0.0110845	-2.77459
Solyc03g119110.4	1516	1820	1906	457	847	693	33.234	39.5878	35.1495	10.1049	18.3094	15.7677	1.2e-10	-2.77438
Solyc12g095970.3	74	88	51	15	34	28	3.55729	4.17027	2.05111	0.70597	1.56579	1.39119	0.000968466	-2.77243
Solyc01g068560.3	1853	2157	2290	776	844	810	48.749	56.2797	50.6375	20.5994	21.8839	22.0997	4.07e-43	-2.77235
Solyc02g069920.4	1781	1819	2150	353	912	874	23.1539	23.4542	23.5067	4.63128	11.6829	11.7905	1.06e-05	-2.7715
Solyc02g094100.4	239	162	338	43	86	132	3.04388	2.044	3.61841	0.549902	1.0794	1.73947	0.000912933	-2.77063
Solyc04g026110.4	374	554	779	145	230	254	6.10559	8.97456	10.6982	2.37674	3.70051	4.29541	2.76e-06	-2.77043
Solyc02g021430.1	954	1001	1589	267	506	542	28.55	29.6994	39.979	8.06121	14.9243	16.836	1.92e-06	-2.76783
Solyc02g055440.4	3585	2860	3702	503	1449	1749	122.165	96.6619	106.05	17.2685	48.643	61.824	0.000242141	-2.76666
Solyc11g022400.1	1336	1477	1550	405	674	596	13.0623	14.3197	12.7412	3.98909	6.4912	6.04628	3.49e-13	-2.76658
Solyc02g082680.4	3601	3629	3979	1147	1832	1355	32.3067	32.2878	30.013	10.3802	16.1958	12.614	7.31e-17	-2.7661
Solyc02g088390.4	635	971	1327	362	377	360	21.5409	32.6853	37.8571	12.375	12.5849	12.6836	3.71e-09	-2.76505
Solyc06g069420.3	971	787	728	216	359	373	23.6478	19.0202	14.9074	5.30235	8.60637	9.42845	9.15e-08	-2.76462
Solyc06g051960.3	4561	9210	8747	2043	2385	3833	57.679	115.514	93.0085	26.0633	29.7322	50.3073	9.38e-06	-2.76364
Solyc04g064930.3	2361	2152	3423	573	1056	1315	50.6487	45.7801	61.7419	12.3983	22.3156	29.2707	4.14e-06	-2.76314
Solyc02g089640.3	1821	1098	1880	572	552	691	18.6991	11.1754	16.2296	5.92317	5.58569	7.36343	1.1e-08	-2.7619
Solyc06g060830.3	6164	7766	5396	727	2599	3562	118.84	148.497	87.4562	14.1416	49.3892	71.2671	0.00179503	-2.76184
Solyc03g078150.3	185	194	243	55	128	48	2.33819	2.42416	2.57235	0.693086	1.58284	0.620882	0.000127217	-2.76
Solyc09g014490.4	68	126	177	44	39	50	0.891653	1.63834	1.95091	0.572249	0.504933	0.67945	0.000197457	-2.75983
Solyc11g005190.3	399	422	344	140	175	136	10.144	10.6501	7.36103	3.57951	4.38341	3.57038	1.33e-12	-2.75678
Solyc04g016430.3	118	287	184	35	70	103	1.6077	3.88565	2.10882	0.472896	0.934859	1.46009	0.00190755	-2.75495
Solyc07g056000.2	257	68	446	117	32	93	5.48522	1.43362	8.01131	2.51356	0.662261	2.04392	0.0185717	-2.75417
Solyc03g025990.1	1018	775	891	228	431	371	45.8604	34.6227	33.7488	10.3217	19.1259	17.2995	4.48e-08	-2.75314
Solyc08g079750.3	1060	894	1128	265	476	441	12.2776	10.2709	10.9857	3.09073	5.42705	5.29383	2.83e-09	-2.75189
Solyc01g110360.3	20150	17290	24177	2726	9846	9923	342.105	291.122	345.098	46.6876	164.753	174.813	0.000465051	-2.75085
Solyc07g047710.3	279	326	643	78	147	218	12.6581	14.6897	24.588	3.56351	6.54933	10.2678	0.000698175	-2.74958
Solyc02g079780.1	1545	1070	1094	209	697	484	43.5408	29.9003	25.9107	5.94051	19.3437	14.1449	0.000251948	-2.74773
Solyc12g056510.3	2638	1956	2086	504	1170	885	37.1848	27.3343	24.7115	7.1606	16.2506	12.9365	2.28e-06	-2.74725
Solyc03g096850.4	5473	5924	8305	1241	2991	3116	135.455	145.407	172.814	30.9928	72.9571	80.0092	1.59e-05	-2.74656
Solyc01g106820.3	770	625	358	140	305	218	10.3568	8.34477	4.04322	1.88946	4.0341	3.04206	0.000167696	-2.7462
Solyc03g006880.3	585	1008	1329	44	230	634	10.9714	18.7586	20.9791	0.826425	4.24375	12.3413	0.0246842	-2.74383
Solyc08g083330.2	9938	8522	7988	2667	3535	4054	141.604	120.417	95.6932	38.339	49.6469	59.937	3.72e-11	-2.74187
Solyc06g053730.1	454	524	443	163	197	193	7.97659	9.14541	6.54411	2.88789	3.40271	3.5194	2.24e-15	-2.74137
Solyc08g007120.3	594	576	649	206	224	274	13.9017	13.3793	12.7651	4.85071	5.15319	6.64745	1.98e-15	-2.74109
Solyc09g065780.3	142	401	370	23	142	139	2.61136	7.32006	5.72607	0.427075	2.56228	2.6421	0.0135189	-2.73952
Solyc04g077780.3	10297	10149	10527	1959	5139	4670	250.134	244.503	214.986	47.9956	123.047	117.706	8.8e-06	-2.73763
Solyc01g099020.3	3935	4139	7231	856	3486	1241	77.9884	81.3548	120.496	17.1014	68.0991	25.5262	0.00130897	-2.73718
Solyc07g065530.1	29	84	186	19	14	56	1.32035	3.8514	7.29245	0.876552	0.611039	2.67504	0.0311787	-2.73471
Solyc12g006970.1	97	90	118	30	51	35	12.4347	11.454	12.8269	3.81486	6.38726	4.6461	2.74e-06	-2.73439
Solyc11g010690.3	152	263	443	51	117	136	1.74125	2.99277	4.2848	0.590359	1.3179	1.61398	0.00148125	-2.73378
Solyc01g091230.3	150	370	681	94	176	151	1.71643	4.20478	6.56693	1.08373	1.98655	1.79583	0.00215376	-2.73367
Solyc08g068230.4	3631	3748	4546	899	1847	1820	43.1279	44.1552	45.4024	10.7698	21.6238	22.4246	1.65e-07	-2.73193
Solyc03g118640.3	3388	3467	4176	1175	1530	1596	20.7526	21.0569	21.5052	7.26067	9.23333	10.1405	1.19e-19	-2.7311
Solyc10g061970.2	50	71	77	19	19	34	2.47249	3.51403	3.20769	0.92962	0.917825	1.73636	0.000465118	-2.72844
Solyc03g059500.3	45	38	41	11	24	10	2.95289	2.42499	2.2141	0.707815	1.54412	0.646461	0.00262695	-2.72749
Solyc01g150126.1	74	51	50	23	30	11	5.3127	3.63394	3.03577	1.63795	2.11773	0.776092	0.00227064	-2.72606
Solyc05g018510.3	4936	6219	7204	1812	2395	2872	30.1662	37.6928	37.0182	11.1746	14.4277	18.2157	2.14e-11	-2.72561
Solyc03g113060.3	2938	2512	3530	772	1327	1366	24.0113	20.3596	24.2552	6.36298	10.6906	11.5812	7.28e-09	-2.7243
Solyc08g079170.3	6225	6576	6673	2525	2530	2624	80.8793	84.7339	72.8946	33.099	32.3901	35.3717	1.12e-44	-2.72239
Solyc06g054270.3	2727	1728	985	589	871	626	30.5049	19.1714	9.25791	6.64352	9.60437	7.26443	0.000167871	-2.72222
Solyc10g008980.4	60835	57073	64940	12127	27061	30564	819.417	762.398	735.401	164.813	359.261	427.207	6.57e-06	-2.71967
Solyc04g074920.2	195	218	516	81	124	133	3.3835	3.75543	7.53453	1.418	2.10701	2.39046	0.000305346	-2.71957
Solyc11g072100.2	916	941	1214	349	408	442	22.0158	22.4349	24.5527	8.47047	9.66411	11.0188	5.11e-18	-2.71908
Solanum_lycopersicum_newGene_839	204	143	235	13	96	90	6.19447	4.52112	6.12002	0.398206	3.12372	2.87606	0.0131816	-2.71775
Solyc04g082950.4	243	472	854	115	225	224	4.0096	7.73963	11.8811	1.91357	3.66894	3.84253	0.000892985	-2.71764
Solyc07g049390.3	1343	1572	2078	529	695	715	21.6396	25.1228	28.1563	8.60007	11.0357	11.9632	1.87e-13	-2.71698
Solyc05g013220.2	1348	1850	2522	674	835	702	19.8733	27.0552	31.2796	10.0283	12.1316	10.7448	2.48e-11	-2.71607
Solyc03g114720.3	1690	1754	1859	450	645	939	18.1969	18.7337	16.8321	4.89013	6.84568	10.4865	2.62e-07	-2.71588
Solyc08g013840.3	321	333	624	81	227	166	7.60514	7.8265	12.4456	1.92264	5.31269	4.07922	0.000280304	-2.71469
Solyc08g074270.4	564	487	733	115	277	282	7.00887	5.99803	7.65877	1.43341	3.39309	3.63706	4.02e-05	-2.71443
Solyc01g080020.2	8298	6936	6138	1065	3264	3688	140.263	116.286	87.2333	18.1635	54.3836	64.6849	0.000446583	-2.71418
Solyc04g082660.2	689	833	1106	224	332	444	18.1327	21.7426	24.4674	5.93289	8.61359	12.1195	8.01e-07	-2.71194
Solyc06g083660.4	3357	3775	5097	983	2038	1699	26.1518	29.1618	33.3837	7.72538	15.6432	13.7339	1.22e-07	-2.71118
Solyc08g006530.4	4593	5128	5734	1785	1865	2391	100.656	111.463	105.656	39.4649	40.2733	54.366	1.42e-16	-2.71095
Solyc02g083540.3	1081	1391	2126	318	754	661	14.3972	18.372	23.804	4.27064	9.89479	9.1339	3.02e-05	-2.71033
Solyc03g114070.3	1842	2217	2862	736	1051	918	45.416	54.2045	59.3405	18.3137	25.5384	23.4701	3.4e-14	-2.71006
Solyc12g009600.2	3946	5361	8402	1011	2249	3217	128.579	173.267	230.213	33.2429	72.2241	108.783	0.000415816	-2.71001
Solyc10g050440.2	3508	3922	5090	887	2002	1907	127.091	140.899	155.036	32.3944	71.476	71.6947	2.3e-06	-2.70998
Solyc01g102670.3	268	302	306	76	144	121	4.0741	4.5537	3.91353	1.1611	2.14738	1.90934	3.86e-08	-2.7091
Solyc10g011770.4	3345	4527	7612	989	2184	2559	108.485	145.611	207.567	32.368	69.8057	86.1303	0.000170333	-2.70603
Solyc05g055730.4	76	294	527	93	99	113	0.980031	3.76978	5.74187	1.21366	1.26331	1.51327	0.00746637	-2.70544
Solyc02g083720.4	89	148	187	43	61	56	1.29938	2.1336	2.29144	0.63082	0.872394	0.843093	2.1e-05	-2.70529
Solyc07g007620.3	2748	2624	2606	721	1183	1228	30.462	28.8411	24.2887	8.06096	12.9194	14.1224	4.78e-10	-2.70514
Solyc12g010230.2	711	872	1016	194	426	382	15.38	18.7148	18.4948	4.22972	9.0891	8.57115	1.37e-06	-2.70256
Solyc07g043130.3	20004	18721	13926	5433	7920	7468	269.831	250.438	157.929	73.9421	105.302	104.534	1.26e-09	-2.70227
Solyc10g085980.2	1011	1044	1339	266	497	547	20.4379	20.9324	22.7683	5.42749	9.90828	11.4689	3.98e-07	-2.70121
Solyc03g118710.3	722	601	780	272	298	263	20.6078	17.0206	18.7371	7.82301	8.38584	7.77614	2.61e-19	-2.70017
Solyc12g036160.3	142	219	308	81	96	78	5.59492	8.5375	10.207	3.22193	3.70003	3.16964	2.53e-06	-2.69917
Solyc01g091260.3	151	170	255	89	91	36	3.74155	4.16543	5.31551	2.21844	2.22639	0.926859	0.000250699	-2.69673
Solyc01g087190.4	957	1129	1637	329	605	508	27.2208	31.8585	39.1499	9.44084	16.9601	14.9934	8.78e-08	-2.69657
Solyc05g056520.4	994	866	1171	281	494	417	15.3588	13.2721	15.223	4.37523	7.51545	6.67807	6.5e-10	-2.69504
Solyc11g068520.3	1017	1278	1868	294	629	658	19.0658	23.7652	29.4519	5.55239	11.6187	12.8031	2.04e-05	-2.69467
Solyc10g008660.2	1128	1104	1045	306	478	508	169.908	164.916	132.271	46.5096	70.8675	79.4078	5.73e-10	-2.69448
Solyc02g087150.3	3596	3848	6095	700	1759	2534	108.698	115.361	154.916	21.3252	52.4005	79.4992	0.000588444	-2.69402
Solyc10g083190.3	1501	2067	2391	726	813	805	17.5019	23.9057	23.437	8.53737	9.33572	9.73325	3.34e-16	-2.69242
Solyc04g077470.3	884	1017	1985	363	477	623	7.11632	8.11908	13.4322	2.94149	3.78305	5.19954	1.75e-05	-2.69078
Solyc02g079940.3	74	54	162	13	32	53	2.51933	1.8114	4.64804	0.442341	1.05769	1.85692	0.0132212	-2.68953
Solyc03g026200.4	454	514	566	97	208	277	10.0123	11.249	10.495	2.14567	4.52496	6.34424	8.92e-05	-2.68908
Solyc12g005630.2	21425	22376	39282	6265	13091	12423	597.909	619.272	921.66	176.396	360.091	359.755	8.3e-06	-2.6883
Solyc02g091780.1	420	822	1198	240	419	262	4.77128	9.25986	11.4426	2.75105	4.68827	3.08477	8.41e-05	-2.68699
Solyc01g098790.2	56	53	82	24	21	27	1.04445	0.973642	1.29323	0.452032	0.375073	0.509289	0.000108162	-2.68639
Solyc06g073540.4	4210	5313	5123	1036	2423	2239	36.2713	45.3998	37.1075	9.00491	20.5745	20.0184	2.84e-06	-2.68589
Solyc09g098540.3	10914	16338	21647	4671	7098	7175	197.186	292.758	328.825	85.1533	126.407	134.527	5.63e-08	-2.68473
Solyc08g065220.3	32261	45520	70588	10797	26351	19425	233.951	327.388	430.377	79.0031	188.355	146.18	3.73e-05	-2.68451
Solyc02g078160.3	636	270	266	25	185	194	14.6776	6.16895	5.16319	0.578501	4.19709	4.64423	0.0222614	-2.6838
Solyc10g008740.3	12827	12948	20795	2661	6128	8633	222.147	222.395	302.786	46.4906	104.596	155.15	0.000275711	-2.68321
Solyc04g008960.3	158	106	86	26	55	52	4.77414	3.17849	2.17105	0.776179	1.64037	1.62926	0.000892606	-2.68273
Solyc12g014450.2	731	604	555	266	242	244	14.6492	12.0085	9.35304	5.36704	4.77415	5.05845	2.33e-11	-2.68257
Solyc01g010480.3	22150	13163	10045	2657	9754	4961	321.434	189.427	122.543	38.8914	139.51	74.7018	0.00174212	-2.6823
Solyc06g072700.3	582	1185	1827	253	492	577	11.32	22.8749	29.8976	4.95674	9.43834	11.6562	0.000621074	-2.68224
Solyc05g005670.1	139	111	231	60	58	65	1.85432	1.46839	2.59461	0.804447	0.755967	0.891193	1.83e-05	-2.68208
Solyc06g061070.3	9103	9962	15301	2286	5487	5392	276.098	299.668	390.182	69.9638	164.031	169.72	2.68e-05	-2.67908
Solyc07g020790.4	383	222	554	90	181	167	5.13366	2.95697	6.24931	1.21322	2.38578	2.3223	0.000234738	-2.67866
Solyc11g067160.2	4432	4202	5386	794	2321	2263	79.5514	74.7949	81.2743	14.3715	41.0613	42.1467	0.0001014	-2.67697
Solyc08g079790.1	815	929	1200	288	486	390	20.98	23.7105	25.9724	7.45917	12.3112	10.4131	1.59e-10	-2.67681
Solyc12g042760.1	91	196	294	67	58	87	1.73744	3.70711	4.7209	1.28828	1.08443	1.71478	0.000875248	-2.67671
Solyc03g098240.3	1222	579	732	198	486	300	17.1141	8.03983	8.6144	2.79683	6.7065	4.35089	0.000333874	-2.67515
Solyc11g045225.1	355	359	364	82	204	137	15.7758	15.8182	13.5854	3.65849	8.90842	6.31664	8.41e-06	-2.67473
Solyc11g072980.1	181	770	741	144	185	276	3.56733	15.0739	12.2984	2.85299	3.59668	5.64419	0.00375138	-2.67113
Solyc05g010240.4	2138	1984	3455	500	1031	1345	27.9714	25.7375	38.0065	6.58986	13.2879	18.2583	9.93e-05	-2.67111
Solyc06g060340.3	4711	9412	18677	1596	6089	4094	119.375	236.542	397.929	40.8098	152.073	107.659	0.00452602	-2.67108
Solyc02g070260.4	3124	4353	5022	1181	1667	2042	13.9605	19.2944	18.8714	5.32609	7.34473	9.47238	1.72e-08	-2.67044
Solyc09g098425.1	221	299	324	89	145	100	5.17183	6.93617	6.38664	2.097	3.33054	2.40905	1.44e-08	-2.66711
Solyc09g011690.4	4760	3935	4980	1681	1871	1944	67.1654	55.0587	59.0728	23.9324	26.009	28.4588	1.64e-21	-2.66589
Solyc01g087500.3	135	297	709	106	71	207	0.795386	1.74307	3.53334	0.628966	0.414056	1.27246	0.0120411	-2.66526
Solyc05g026550.3	2808	2650	3757	530	1356	1634	85.9152	80.4038	96.643	16.3616	40.8933	51.8672	0.000163592	-2.66465
Solyc01g107190.3	1546	1192	1277	312	560	703	45.58	34.8397	31.6386	9.28009	16.2578	21.4875	8.22e-06	-2.66258
Solyc09g092480.1	862	525	475	79	404	218	16.8749	10.1839	7.82096	1.55971	7.80298	4.42172	0.00509206	-2.66245
Solyc05g052560.1	1532	440	1188	465	256	454	251.432	71.5455	163.797	76.9003	41.3982	77.2112	0.00192469	-2.65918
Solyc06g054070.3	81	75	116	29	34	42	3.08254	2.80982	3.71713	1.0969	1.25342	1.62999	2.46e-05	-2.65812
Solyc02g065540.3	343	321	436	134	131	171	14.1742	13.166	15.1473	5.58151	5.30707	7.30698	1.58e-10	-2.65729
Solyc07g014690.3	148	51	89	10	38	52	2.41029	0.813538	1.22049	0.150094	0.611048	0.8752	0.0210157	-2.65726
Solyc09g083380.4	250	565	1093	146	168	357	7.22059	16.2311	26.6374	4.25418	4.77694	10.7296	0.00548555	-2.65679
Solyc02g069410.4	972	1226	1679	301	571	635	19.985	25.0148	29.0313	6.23722	11.5673	13.541	5.94e-06	-2.65519
Solyc04g074730.1	523	652	1022	282	304	279	36.4005	44.959	59.8171	19.7924	20.8602	20.1469	6.15e-09	-2.65143
Solyc08g068590.4	1790	1771	2308	510	843	972	38.3002	37.5972	41.5297	10.9958	17.7687	21.589	4.89e-08	-2.64995
Solyc06g083580.4	952	1999	3012	370	818	1018	12.2245	25.4677	32.5328	4.78829	10.3548	13.569	0.00139394	-2.64801
Solyc10g005330.3	3663	4563	5049	1781	2095	1491	39.524	48.8344	45.8061	19.3926	22.2759	16.6894	4.71e-19	-2.64763
Solyc12g006000.1	154	91	147	57	45	51	1.93052	1.13005	1.55434	0.721885	0.55505	0.655637	2.55e-05	-2.6475
Solyc12g008530.2	52	173	268	23	64	81	1.23534	4.11867	5.41298	0.556592	1.50639	2.00664	0.0174036	-2.6465
Solyc02g090680.3	1125	1072	1310	309	562	532	28.5442	26.9795	27.9569	7.90913	14.0515	14.0141	8.26e-09	-2.64649
Solyc06g005070.3	102	167	90	8	86	30	2.97491	4.86051	2.21245	0.236436	2.4873	0.883876	0.0308232	-2.6442
Solyc12g100160.3	6158	6832	10354	1993	2894	4204	173.584	191.007	245.415	56.6855	80.4052	122.97	4.98e-06	-2.64066
Solyc07g015860.3	2070	2158	3061	525	988	1322	39.3831	40.7216	48.9619	10.0709	18.5254	26.104	2.51e-05	-2.64039
Solyc01g058320.4	508	518	913	166	326	268	9.64169	9.74497	14.5739	3.16649	6.101	5.27215	7.3e-06	-2.63998
Solyc02g030480.4	345	1119	2148	373	478	450	6.92458	22.3162	36.3156	7.55056	9.47096	9.38133	0.00418129	-2.63928
Solyc03g115650.4	15340	15191	9157	4810	6506	4780	551.426	541.557	276.735	174.458	230.508	178.307	1.7e-07	-2.63906
Solyc02g093170.4	901	795	1605	221	474	567	17.9389	15.7066	26.8819	4.42792	9.30312	11.7195	0.000249136	-2.63828
Solyc07g055740.1	1526	2729	3689	865	971	1247	39.8346	70.6576	80.9631	22.7872	24.9652	33.7862	4.83e-06	-2.63734
Solyc11g072490.2	3803	6804	8639	1485	2984	2991	44.0194	78.103	84.0657	17.3361	34.0428	35.9188	4.27e-05	-2.63705
Solyc12g006980.2	2379	1818	3035	827	898	1155	30.7491	23.3026	32.9799	10.7749	11.4366	15.4925	3.35e-09	-2.63663
Solyc03g005090.4	4288	3669	3313	915	1928	1690	32.2442	27.361	20.9455	6.93887	14.2864	13.1863	1.55e-06	-2.63639
Solyc03g120920.1	214	152	148	57	88	61	10.5864	7.47521	6.16716	2.82156	4.29605	3.13313	8.57e-06	-2.6352
Solyc08g068160.2	133	163	227	60	96	50	2.96335	3.59611	4.246	1.33569	2.09498	1.13463	1.54e-05	-2.63489
Solyc01g080130.2	1705	1770	2160	568	769	926	18.4252	18.9777	19.6336	6.18941	8.18969	10.3844	7.5e-11	-2.63401
Solyc02g078570.3	116	166	233	59	61	80	2.15441	3.06594	3.63928	1.09505	1.11215	1.53155	1.58e-05	-2.6334
Solyc05g052350.3	1089	1428	1648	402	696	576	11.1287	14.4745	14.1565	4.14207	7.00812	6.1027	1.45e-09	-2.63315
Solyc10g054420.2	5558	5543	5712	1465	2435	2852	154.635	152.928	133.595	41.1159	66.7754	82.3234	4.03e-08	-2.63129
Solyc06g071320.3	160	192	284	55	65	122	5.84697	6.93942	8.7041	2.00333	2.30812	4.6132	0.000322942	-2.63085
Solyc09g014760.4	3877	3355	4044	965	1827	1751	74.4335	63.8682	65.2704	18.6793	34.5641	34.8729	4.59e-08	-2.62997
Solyc04g081300.4	688	1394	2545	418	598	719	8.93937	17.9809	27.8335	5.4755	7.66909	9.70843	0.000678278	-2.62906
Solyc11g033283.1	2612	3022	3178	1171	1304	1136	30.2517	34.7123	30.9473	13.6771	14.8833	13.6532	1.38e-44	-2.62877
Solyc06g068220.3	7550	6812	7811	1754	3763	3403	131.496	117.666	114.379	30.8233	64.6021	61.4912	4.73e-07	-2.62732
Solyc01g006400.4	3723	22986	15542	3342	7419	4750	110.721	678.041	388.639	100.295	217.482	146.61	0.00688357	-2.62685
Solyc08g074450.3	949	1190	1913	186	628	708	21.3792	26.5926	36.2407	4.21042	13.9424	16.5456	0.0019745	-2.62598
Solyc03g031760.4	1140	1313	1635	530	616	519	15.1889	17.348	18.3079	7.11335	8.08569	7.17203	1.74e-21	-2.62509
Solyc03g006360.3	1847	2045	648	353	746	668	63.8708	70.1377	18.8385	12.2946	25.4268	23.9543	0.00210639	-2.62381
Solyc07g062870.3	3900	4007	5399	971	1710	2527	128.768	131.216	149.883	32.3289	55.6528	86.5679	3.22e-05	-2.62352
Solyc06g069120.3	19515	14922	10181	4918	6316	6828	457.542	346.96	200.672	116.341	145.949	166.12	2.62e-06	-2.62308
Solyc10g084600.2	69	76	47	25	32	18	4.27391	4.66696	2.45937	1.54717	1.93948	1.10308	0.000790783	-2.62268
Solyc01g006830.3	5645	5290	8997	2472	2789	2755	93.5895	86.9719	125.401	41.3508	45.5629	47.3866	9.13e-12	-2.62267
Solyc11g007730.2	135	162	111	36	62	64	2.71315	3.23	1.87288	0.730663	1.21151	1.31813	5.4e-05	-2.62185
Solyc06g051830.3	219	430	747	97	178	242	2.7892	5.4514	8.02599	1.24473	2.24263	3.20902	0.00239847	-2.61908
Solyc06g036290.3	222	387	704	94	261	140	2.43071	4.19843	6.47605	1.02958	2.80765	1.58111	0.002252	-2.61856
Solyc03g062710.4	4276	3199	4361	545	1895	2122	79.7526	59.183	68.3946	10.2577	34.8384	41.0727	0.00127624	-2.61832
Solyc04g049390.3	2520	2604	3198	808	1365	1213	55.4421	56.8177	59.1621	17.9185	29.5941	27.6944	2.98e-11	-2.61744
Solyc08g061930.4	1686	1192	1485	349	742	668	24.5981	17.2539	18.2193	5.1338	10.6705	10.109	4.89e-06	-2.61524
Solyc11g006020.2	4316	3958	4219	890	1766	2312	162.346	147.648	133.422	33.7757	65.4761	90.2456	2.43e-05	-2.61421
Solyc02g068710.3	763	568	700	234	303	294	18.3665	13.5452	14.1674	5.6818	7.176	7.32348	1.51e-11	-2.61416
Solyc09g090910.3	274	303	248	90	121	125	5.99498	6.57451	4.57058	1.97349	2.60199	2.82682	3.97e-09	-2.6135
Solyc01g096700.4	31609	29377	26231	10967	12248	12743	392.577	361.838	273.899	137.427	149.933	164.232	3.01e-17	-2.61249
Solyc02g087400.1	6476	6383	9117	1540	3419	3754	161.281	157.647	190.912	38.6801	83.9119	97.0153	2.1e-05	-2.61055
Solyc07g006620.4	6313	7159	6484	1399	3284	3325	73.8765	83.088	63.7917	16.5182	37.8754	40.3773	1.37e-05	-2.60899
Solyc05g014370.3	193	190	292	74	105	93	5.51197	5.38736	7.02881	2.11948	2.9425	2.7444	6.45e-08	-2.6068
Solyc05g005880.2	4665	4286	6279	1212	2185	2679	158.599	144.507	179.466	41.5642	73.2026	94.4891	4e-06	-2.60655
Solyc05g052550.1	1917	632	1946	681	387	648	146.78	47.9783	125.277	52.5883	29.1541	51.4367	0.0014052	-2.60411
Solyc06g007760.4	4040	3954	5703	866	1722	2738	151.552	147.09	179.856	32.7778	63.6697	106.575	0.000289184	-2.60365
Solyc02g078760.1	454	488	652	186	132	304	16.4126	17.4793	19.8177	6.75766	4.67521	11.4	6.53e-05	-2.60199
Solyc01g087760.2	62	64	86	14	24	42	7.15335	7.24827	8.31534	1.5742	2.71768	4.98038	0.00316559	-2.59985
Solanum_lycopersicum_newGene_1714	300	291	391	90	124	178	5.06248	4.85534	5.43766	1.40339	2.02068	2.9355	4.76e-06	-2.59963
Solyc10g005030.4	4617	3999	4240	1842	1960	1538	49.8203	42.7962	38.4603	20.0517	20.8418	17.2153	7.24e-20	-2.59881
Solyc02g070910.3	1773	2157	2191	968	733	804	9.61723	11.6048	9.99248	5.29814	3.91716	4.52251	7.54e-15	-2.5985
Solyc03g096800.4	17886	18126	17240	4707	9753	7444	128.488	129.141	104.126	34.1205	69.0574	55.4933	4.56e-08	-2.59642
Solyc03g121180.4	19197	26505	34771	9512	13832	9447	353.798	484.473	538.78	176.889	251.268	180.674	1.02e-09	-2.59533
Solyc01g079240.3	2418	5404	7786	1984	2360	1769	27.7617	61.5367	75.1656	22.9778	26.7059	21.0788	8.06e-05	-2.59353
Solyc05g052570.3	7264	2227	6115	2539	1286	2176	152.407	46.3286	107.871	53.7512	26.5777	47.3625	0.00173621	-2.59206
Solyc03g058430.3	1161	1631	2156	534	810	669	28.1444	39.2107	43.9489	13.0651	19.3408	16.8316	9.19e-09	-2.5874
Solyc08g082570.4	1448	1521	2058	370	883	774	36.0778	37.5902	43.1242	9.29689	21.6746	19.9998	1.18e-05	-2.58722
Solyc10g005335.1	142	210	164	69	98	41	12.2665	18.032	11.9424	5.96086	8.33535	3.63448	0.000119652	-2.58325
Solyc11g008680.2	161	336	563	84	147	171	3.05027	6.30082	8.96712	1.59121	2.74584	3.36098	0.00201284	-2.58294
Solyc05g052760.4	8795	8042	8324	2748	3996	3742	116.631	105.774	92.8076	36.767	52.2343	51.4869	8.27e-15	-2.58257
Solyc03g116800.4	573	543	835	183	297	312	22.3386	20.9929	27.3673	7.19653	11.3845	12.5996	2.64e-07	-2.58245
Solyc01g005280.3	65	65	166	43	34	35	1.60524	1.57757	3.45257	1.06114	0.828989	0.896292	0.00225588	-2.58178
Solyc06g073090.3	20297	13415	12616	2326	6816	9064	386.481	253.334	201.963	44.6738	127.91	179.096	0.00212821	-2.5793
Solanum_lycopersicum_newGene_1462	301	356	439	84	217	142	6.61588	7.77849	8.11828	1.8592	4.69572	3.2414	4.65e-05	-2.57794
Solyc07g150140.1	89	99	118	36	40	48	8.0906	8.855	8.95313	3.29325	3.57035	4.49682	1.76e-06	-2.57758
Solyc12g006997.1	75	94	93	21	37	46	2.38778	2.9714	2.48522	0.666288	1.16018	1.50231	0.000277725	-2.57725
Solyc05g012620.4	1869	1955	2768	527	1089	1057	33.1932	34.4349	41.3333	9.43394	19.0547	19.4838	3.11e-06	-2.57716
Solyc08g079770.3	440	512	442	159	201	218	6.53604	7.53208	5.5129	2.3732	2.94122	3.35706	1.65e-11	-2.57689
Solyc12g088750.2	2103	1955	2283	690	979	971	38.7282	35.6997	35.3485	12.8108	17.7712	18.5447	8.99e-15	-2.57512
Solyc01g087370.2	771	619	606	242	265	320	12.192	9.69975	8.05552	3.85276	4.12734	5.24341	1.9e-09	-2.57512
Solyc04g082910.1	845	827	786	316	343	368	88.1645	85.5759	68.9598	33.1958	35.2316	39.8172	1.67e-17	-2.57372
Solyc05g014190.4	642	650	1013	274	400	274	17.7623	17.8358	23.5633	7.63771	10.8957	7.84322	3.86e-09	-2.57362
Solyc00g500208.1	129	138	654	184	29	82	1.60502	1.70503	6.87	2.31299	0.347171	1.05126	0.0437996	-2.57242
Solyc01g094723.1	21	82	92	12	39	18	0.570357	2.29486	2.18011	0.316567	1.07597	0.506791	0.0271811	-2.57161
Solyc02g077250.2	101	100	131	18	52	59	2.20427	2.17279	2.40374	0.37981	1.10383	1.34301	0.00236544	-2.57062
Solyc01g079470.4	16804	12814	23105	3014	9188	8755	655.316	495.572	757.539	118.589	353.167	354.289	0.000546716	-2.56538
Solyc10g076700.2	712	786	1247	86	403	536	26.6985	29.212	39.3288	3.23666	14.8845	20.8477	0.00966259	-2.56436
Solyc05g052980.4	5262	4869	4451	2319	2121	1680	89.6625	82.2833	63.7662	39.8607	35.6164	29.7028	3.82e-13	-2.56342
Solyc03g034300.1	108	127	156	54	50	56	6.69122	7.81254	8.12349	3.35359	3.04576	3.5448	1.56e-07	-2.56315
Solyc02g065170.3	1162	1321	2149	412	531	896	15.3804	17.3378	23.9102	5.49337	6.92764	12.2983	7.8e-05	-2.5612
Solyc12g098950.2	3496	4086	4047	1552	1747	1605	59.5329	68.9974	57.9377	26.6643	29.3138	28.3544	1.18e-41	-2.55982
Solyc10g083380.2	722	307	466	150	266	195	22.0943	9.30683	11.9938	4.62267	8.03124	6.17568	0.000280304	-2.55861
Solyc03g005320.3	524	1043	1459	355	411	441	6.20132	12.2415	14.5241	4.2327	4.79119	5.41118	3.88e-05	-2.55843
Solyc03g097950.4	3412	3207	4227	778	1566	2045	122.002	113.732	127.075	28.0515	55.1722	75.8733	4.73e-05	-2.557
Solyc03g097400.1	71	115	110	36	40	44	11.0383	17.7221	14.3217	5.65122	6.11503	7.08582	2.18e-05	-2.55586
Solyc10g075110.2	320	687	849	229	174	322	16.7349	35.7132	37.3728	12.0713	8.9766	17.4904	0.000427194	-2.55527
Solyc02g065530.4	56	160	207	38	45	75	1.38037	3.95079	4.34174	0.947927	1.09103	1.92813	0.00693988	-2.55342
Solyc10g047960.3	1253	1415	1598	533	583	671	31.0751	34.8254	33.3352	13.3413	14.2474	17.2594	3.79e-18	-2.55102
Solyc12g021360.3	3210	3210	3729	787	1683	1716	70.1144	69.55	68.4859	17.3422	36.2338	38.9037	4.09e-06	-2.54877
Solyc01g091780.4	1552	1527	2190	519	874	798	34.3943	33.5622	40.8044	11.6002	19.0832	18.3357	6.12e-09	-2.54737
Solyc09g008270.3	326	503	781	137	245	261	9.06328	13.9021	18.2866	3.84148	6.71001	7.54664	0.000158262	-2.54728
Solyc06g009220.4	2389	2468	3029	829	1201	1271	28.8764	29.5862	30.781	10.0997	14.3	15.9326	7.26e-12	-2.54513
Solyc10g049870.1	70	63	89	11	37	38	3.69653	3.30448	3.97466	0.561494	1.91531	2.08642	0.00586509	-2.54337
Solyc11g018550.4	3152	2835	4042	984	1671	1537	57.2359	51.0543	61.713	18.0217	29.9027	28.9633	4.14e-09	-2.54094
Solyc04g015850.3	1360	1386	1848	476	645	788	33.7654	34.1364	38.59	11.9157	15.7886	20.3123	4.36e-09	-2.54056
Solyc03g115200.3	134	615	945	164	155	293	3.68953	16.7975	21.8797	4.55553	4.20095	8.36128	0.01538	-2.54017
Solyc12g099930.2	20262	22026	25395	4826	13773	9401	390.124	420.587	411.079	93.7581	261.383	187.829	3.7e-05	-2.53808
Solyc04g076480.3	982	1028	916	369	465	411	8.31119	8.63089	6.51813	3.14858	3.87528	3.61047	9.9e-18	-2.53775
Solyc12g006270.2	193	140	145	45	70	82	3.48332	2.49464	2.1905	0.809566	1.23568	1.52852	6.77e-05	-2.53722
Solyc04g049380.4	3083	3091	4173	1028	1826	1489	34.5461	34.3499	39.3223	11.6242	20.1637	17.3092	1.82e-09	-2.53569
Solyc03g051810.4	1736	2076	2934	743	1059	1010	33.2727	39.475	47.2842	14.3595	20.006	20.0776	7.68e-10	-2.53493
Solyc03g005000.4	2911	2380	3141	1082	1281	1215	53.7471	43.5757	48.759	20.1615	23.3079	23.2696	4.8e-19	-2.53418
Solyc02g071880.3	1748	1859	2045	528	981	869	14.0565	14.8305	13.8299	4.28183	7.77723	7.24761	8.77e-09	-2.53273
Solyc08g078100.1	311	359	573	123	224	165	6.07844	6.96673	9.44009	2.41277	4.31609	3.34566	6.42e-06	-2.53271
Solyc08g065420.3	200	257	389	46	164	125	2.99369	3.8205	4.91664	0.692015	2.42105	1.94852	0.00255283	-2.52884
Solyc04g081260.3	2630	3657	5011	994	1736	1906	18.5721	25.6137	29.7514	7.08291	12.0844	13.9655	7.1e-06	-2.52868
Solyc03g123490.1	1399	1443	1665	423	775	700	16.4114	16.7902	16.4243	5.00166	8.96235	8.52023	1.05e-08	-2.52803
Solyc01g080600.4	42	97	282	33	56	61	1.69197	3.90589	9.66729	1.35501	2.23462	2.5559	0.0241883	-2.52659
Solyc01g110550.3	970	1132	1725	299	593	669	28.0614	32.469	41.9483	8.70603	16.9065	20.0791	5.25e-05	-2.52605
Solyc08g076470.4	3012	3513	5693	1161	2021	1866	45.4782	52.5968	72.2605	17.6824	30.0757	29.2295	1.64e-06	-2.52574
Solyc03g115820.3	13126	13804	20683	4220	7212	8255	243.711	254.182	322.855	79.0597	131.969	159.055	1.72e-06	-2.52556
Solyc11g072710.3	35124	30583	30126	8763	15726	16043	276.93	239.143	199.698	69.7155	122.208	131.264	2.3e-07	-2.5199
Solyc02g077770.3	446	402	283	63	250	148	20.7062	18.499	11.0559	2.91224	11.4522	7.11184	0.00331829	-2.51902
Solyc05g009890.1	170	358	705	147	169	165	3.43122	7.18659	11.9874	2.98613	3.36843	3.4628	0.00204335	-2.51817
Solyc01g074000.3	66	257	764	93	136	150	2.81602	10.9294	27.6252	4.01071	5.73609	6.66082	0.0321602	-2.51816
Solyc09g018010.3	8991	17255	20861	4441	7738	7166	358.213	681.831	698.816	178.544	303.885	296.291	2.24e-05	-2.51814
Solyc11g065220.2	65	62	236	30	60	45	1.15327	1.10127	3.55213	0.531912	1.0597	0.833942	0.0149293	-2.51801
Solyc10g078680.3	82	171	264	35	82	83	0.995199	2.05655	2.69509	0.426659	0.980283	1.04555	0.00534876	-2.51791
Solyc09g083190.3	4154	3785	5742	784	2329	2442	104.961	94.8562	121.987	19.9795	58.0061	64.0293	0.0006042	-2.51677
Solyc09g015080.3	950	1031	1282	158	710	451	15.7839	16.9956	17.9112	2.64939	11.6236	7.77623	0.00225137	-2.51654
Solyc06g072730.4	75	129	271	59	52	72	0.799194	1.36745	2.44973	0.630709	0.54638	0.795691	0.00375268	-2.51502
Solyc03g117100.3	57	94	131	38	33	42	1.54847	2.51459	2.99404	1.01645	0.871407	1.17912	0.000528567	-2.51389
Solyc06g084480.3	1153	1377	1917	375	696	770	10.0687	11.9231	14.074	3.30163	5.9906	6.97764	9.55e-06	-2.51257
Solyc11g066720.3	3645	5118	9692	2045	2952	2547	58.1575	80.9757	130.007	32.9193	46.4238	42.1684	3.08e-05	-2.5114
Solyc04g057980.3	2230	1994	3255	569	1425	1111	70.1643	62.2405	86.1331	18.0487	44.2071	36.2844	4.85e-05	-2.511
Solyc06g054240.3	47	50	61	11	24	28	1.10401	1.18597	1.22371	0.263307	0.554554	0.685446	0.00295385	-2.50998
Solyc03g007470.4	1161	1779	1676	755	569	619	36.7791	55.9086	44.6459	24.1349	17.7454	20.3429	1.29e-09	-2.50913
Solanum_lycopersicum_newGene_1167	271	152	148	45	123	67	2.49235	1.37056	1.15199	0.410473	1.10699	0.628773	0.00282673	-2.50884
Solyc11g012360.2	10052	9026	6774	2610	3987	4391	142.266	126.701	80.603	37.2744	55.6136	64.4847	1.07e-06	-2.50865
Solyc03g025410.4	1566	2033	2865	446	1347	870	33.3995	43.0068	51.3958	9.59524	28.322	19.2502	0.000321274	-2.50371
Solyc04g016480.3	86	127	246	51	57	74	1.37313	2.02095	3.32954	0.829431	0.90568	1.23609	0.00143953	-2.50094
Solyc01g087690.3	670	821	963	231	503	304	14.5724	17.7206	17.6252	5.058	10.7782	6.86351	3.2e-06	-2.50067
Solyc05g056470.1	100	136	199	48	76	56	1.48756	2.00172	2.49192	0.713825	1.10995	0.866291	5.91e-05	-2.49924
Solyc06g007980.4	7866	7920	9164	2585	3844	4217	100.165	100.03	98.112	33.2157	48.2434	55.7238	1.3e-10	-2.49907
Solyc03g111110.1	129	120	115	33	54	65	15.4945	14.3048	11.6353	3.95192	6.41674	8.05423	8.69e-05	-2.49817
Solyc11g010350.2	290	358	572	114	208	184	3.51087	4.31211	5.84072	1.38763	2.48127	2.31591	2.86e-05	-2.49746
Solyc10g006870.1	1093	1245	1682	260	753	648	11.9359	13.4893	15.4488	2.86247	8.10486	7.34412	0.000275173	-2.49722
Solyc04g008570.4	1775	1785	2148	645	923	884	22.4686	22.415	22.8699	8.23519	11.5164	11.6106	9.41e-15	-2.49612
Solyc07g025530.1	309	295	431	85	165	181	26.9607	25.5848	31.6902	7.48259	14.1906	16.3834	4.11e-05	-2.49498
Solyc05g006770.4	224	305	345	77	158	132	4.56109	6.15779	5.90836	1.57509	3.16546	2.79265	1.41e-05	-2.49346
Solyc07g066350.1	74	106	166	38	36	64	1.68119	2.39579	3.18383	0.860924	0.796854	1.51856	0.00145352	-2.49252
Solyc03g114130.1	339	317	784	110	263	207	21.9327	20.3027	42.6424	7.13425	16.7722	13.8975	0.0015051	-2.49251
Solyc11g020670.1	2508	1326	807	489	658	782	61.4493	32.2157	16.6204	12.0808	15.883	19.8692	0.0019597	-2.49207
Solyc02g088730.2	471	362	285	103	175	194	17.2209	13.1214	8.74865	3.79959	6.30756	7.33924	0.000111197	-2.49193
Solyc05g008870.3	979	942	1079	378	435	480	17.7411	16.9364	16.4503	6.91516	7.76266	9.03447	1.13e-17	-2.49058
Solyc05g010450.1	746	822	585	190	373	354	23.0658	25.2249	15.2184	5.92916	11.3631	11.3395	1.59e-05	-2.48759
Solyc03g006490.3	4769	8426	6555	1535	2597	4016	124.391	217.966	143.744	40.3777	66.7537	108.707	0.000283459	-2.48603
Solyc01g008780.3	1755	1833	2022	618	968	841	40.0726	41.5253	38.8219	14.2232	21.7762	19.9172	2.17e-13	-2.48375
Solyc05g014560.3	29	96	180	39	26	46	0.652529	2.13171	3.40395	0.880626	0.557027	1.06303	0.0248621	-2.4833
Solyc09g008380.3	47	55	148	46	12	32	0.859377	1.00819	2.29595	0.854585	0.218634	0.606936	0.0286312	-2.48319
Solyc02g066920.3	997	1015	1070	153	479	623	39.8128	40.2221	35.9238	6.14459	18.836	25.7933	0.00239099	-2.48297
Solyc01g091520.3	1351	1398	1676	555	711	652	35.1682	36.0894	36.6806	14.5774	18.2304	17.5934	2.18e-22	-2.48224
Solyc07g021700.3	418	407	587	132	268	200	7.83598	7.55905	9.24826	2.48491	4.95527	3.87885	2.86e-06	-2.48201
Solyc11g006590.2	4318	4161	3905	835	2983	1411	78.8377	75.339	59.9411	15.3698	53.67	26.7191	0.000737666	-2.48112
Solyc04g081890.1	72	47	90	25	29	32	4.85635	3.11797	5.09565	1.65334	1.91289	2.19058	0.000644262	-2.48015
Solyc12g017450.2	1545	1671	2337	744	678	935	23.6327	25.3439	30.056	11.4854	10.2182	14.8339	1.49e-09	-2.47961
Solyc12g006590.3	385	390	397	112	246	145	15.1273	15.2238	13.1368	4.42795	9.54401	5.91221	7.13e-06	-2.47812
Solyc03g031840.3	1309	1186	1373	294	668	677	32.3329	29.0512	28.5175	7.31163	16.2625	17.3345	3.27e-05	-2.4779
Solyc01g057830.3	10131	9723	12486	2307	4515	6629	180.681	171.966	187.207	41.5013	79.3662	122.676	0.000186994	-2.47693
Solyc01g096220.3	118	148	429	70	70	126	2.78778	3.46304	8.54803	1.6581	1.62855	3.09671	0.00893679	-2.47681
Solyc06g066770.1	131	128	229	54	55	91	3.25259	3.16137	4.79791	1.3578	1.3334	2.35169	0.000335884	-2.47496
Solyc06g084470.4	513	489	706	124	284	306	17.199	16.2381	19.8895	4.16506	9.38822	10.6503	0.000158953	-2.47405
Solyc07g042580.3	191	262	371	114	86	141	1.85932	2.53564	3.0406	1.1233	0.827437	1.42584	5.04e-05	-2.47358
Solyc06g071670.1	569	471	741	239	252	273	15.7414	12.9084	17.2252	6.66155	6.86515	7.81998	2.22e-10	-2.47353
Solyc01g106470.3	1731	2213	3108	556	823	1505	24.2841	30.7913	36.6646	7.85821	11.3729	21.9062	0.000491818	-2.47222
Solyc12g005050.2	524	696	817	196	325	345	8.73189	11.505	11.4477	3.29682	5.33972	5.96244	8.62e-07	-2.47181
Solyc03g005010.4	2528	2237	2579	630	1047	1437	27.5778	24.1981	23.6576	6.93171	11.2578	16.2703	1.43e-05	-2.47144
Solyc01g109580.4	44	86	229	37	59	40	0.662717	1.28069	2.91198	0.559387	0.868572	0.623147	0.0172734	-2.47103
Solyc05g006050.3	3155	3953	4277	860	1991	1969	43.7719	54.3971	49.8969	12.0411	27.2185	28.3395	3.08e-05	-2.47089
Solyc01g008770.3	1936	2639	3376	1166	1086	1148	16.6456	22.5067	24.4063	10.1115	9.20505	10.2391	3.97e-11	-2.47065
Solyc06g008510.3	61	81	290	35	53	72	0.835287	1.10994	3.3733	0.484676	0.714775	1.02725	0.0223035	-2.46947
Solyc09g007560.4	7321	6679	9466	1970	3658	4322	166.27	150.419	180.746	45.1373	81.88	101.862	9.65e-06	-2.46768
Solyc03g005030.3	997	1069	1389	396	604	498	22.8355	24.2878	26.7591	9.14115	13.636	11.8214	8.13e-12	-2.46496
Solyc02g005210.3	2658	2564	3756	1083	1459	1344	63.7618	61.0048	75.7773	26.1994	34.4969	33.4576	6.79e-13	-2.46479
Solyc10g011820.4	528	975	1322	344	418	421	10.9074	19.9782	22.9675	7.16915	8.49664	9.02158	1.8e-05	-2.46458
Solyc11g072860.2	90	266	650	119	103	153	7.93764	23.2548	48.2822	10.597	8.96136	13.9988	0.018876	-2.46427
Solyc03g111680.3	86	293	412	122	80	105	0.650896	2.20304	2.62756	0.933607	0.593536	0.826257	0.00831437	-2.46426
Solyc07g005470.4	263	534	566	197	256	117	2.85716	5.76483	5.18302	2.15645	2.74495	1.31898	0.000315591	-2.46388
Solyc09g009190.4	7430	7327	11570	1935	5273	3917	66.4618	65.0046	87.0184	17.4664	46.496	36.36	0.000124215	-2.46202
Solanum_lycopersicum_newGene_429	219	246	271	83	148	87	5.76235	6.41839	5.98769	2.19275	3.8307	2.36572	8.61e-07	-2.46132
Solyc04g071360.4	3130	3150	3377	990	1540	1661	36.6858	36.6154	33.2778	11.7077	17.7861	20.2034	1.73e-09	-2.45963
Solyc02g088190.4	862	1089	1172	352	545	461	15.4113	19.305	17.6165	6.34046	9.59311	8.55215	1.99e-11	-2.4595
Solyc04g072031.1	107	312	333	45	168	85	3.46706	10.0677	9.10959	1.45168	5.39412	2.86585	0.0125432	-2.45944
Solyc07g062810.4	93	148	226	58	57	77	1.8149	2.87759	3.72516	1.1439	1.08862	1.55984	0.000427702	-2.45877
Solyc04g054730.3	161	114	140	47	31	90	1.74177	1.21776	1.26664	0.508962	0.327389	1.00482	0.00396532	-2.4571
Solyc02g072170.3	77	46	44	28	21	20	4.02232	2.37161	1.92084	1.45453	1.07558	1.07669	0.00379153	-2.45569
Solyc12g011440.2	1805	1605	1374	592	703	796	64.1236	56.5432	41.0336	21.1913	24.6134	29.322	1.7e-09	-2.45518
Solyc05g018210.3	1961	2122	2313	565	1243	962	23.754	25.4831	23.5527	6.89773	14.8363	12.093	1.28e-06	-2.45435
Solyc10g083370.1	111	71	54	20	48	30	8.31312	5.24929	3.39272	1.5171	3.51923	2.30674	0.00668812	-2.45358
Solyc11g071740.2	237	30	144	50	45	61	10.7523	1.32319	5.50763	2.27788	2.00223	2.85875	0.0352028	-2.45264
Solyc03g025430.1	553	350	336	68	243	206	21.1416	13.2804	10.787	2.59304	9.13617	8.18483	0.00450325	-2.45199
Solyc03g114120.3	778	964	1005	350	454	400	22.8442	28.0664	24.7866	10.3653	13.1129	12.1743	9.76e-18	-2.45165
Solyc09g092645.1	645	820	601	151	351	377	13.6599	17.2346	10.702	3.22586	7.33089	8.27626	0.000260941	-2.45065
Solyc10g074470.3	979	1316	1527	287	633	696	10.4614	13.9489	13.7171	3.08626	6.66573	7.71105	0.000105594	-2.45054
Solanum_lycopersicum_newGene_82	20694	28555	38903	12703	14203	11144	466.539	638.436	737.377	288.967	315.603	260.707	8.18e-10	-2.44984
Solyc12g099500.2	268	96	210	102	41	87	20.4842	7.2737	13.4605	7.81725	3.05537	6.90945	0.00881331	-2.44678
Solyc12g094720.3	1208	1043	1626	266	657	712	33.4045	28.5806	37.8032	7.40328	17.9046	20.4313	0.000342675	-2.44502
Solyc01g097460.3	4659	6515	13510	2665	3688	3893	110.455	153.172	269.277	63.7364	86.1586	95.756	0.000216599	-2.44468
Solyc10g055780.1	67	222	409	67	129	74	3.4939	11.5585	18.1046	3.52792	6.69529	4.02146	0.017394	-2.44457
Solyc06g054540.3	849	822	624	204	317	461	16.3885	15.7384	10.1282	3.9699	6.02675	9.23093	0.000125097	-2.44415
Solyc09g005320.3	39	38	69	7	25	25	0.582217	0.561345	0.886554	0.100551	0.367579	0.394932	0.0190677	-2.44388
Solyc05g012790.4	1210	2194	3538	789	924	1168	14.4656	26.0278	35.5759	9.51201	10.8865	14.489	0.000202402	-2.44362
Solyc02g005110.3	601	809	990	267	397	375	12.9553	17.2829	17.9382	5.78685	8.41998	8.38859	1.54e-08	-2.44355
Solyc06g051200.3	3979	4190	6983	1030	2386	2907	97.4283	101.748	143.744	25.4488	57.5806	73.8588	0.000558031	-2.44236
Solyc07g063970.3	164	402	479	26	179	189	2.29126	5.59438	5.65595	0.35677	2.46846	2.74723	0.0331394	-2.44177
Solyc09g064500.3	1546	1947	4009	554	1273	1264	46.1659	57.6629	100.675	16.6927	37.4788	39.1656	0.00123366	-2.44156
Solyc10g083790.3	1546	1879	2648	579	959	1062	22.1807	26.7457	31.9523	8.38007	13.5544	15.808	3.05e-06	-2.44154
Solyc06g008500.3	596	747	1194	147	492	411	7.78318	9.68901	13.126	1.93645	6.33213	5.57147	0.00218986	-2.44029
Solyc06g076670.3	1170	1251	1419	433	767	488	21.0663	22.3396	21.4744	7.86524	13.6022	9.11128	3.68e-09	-2.43979
Solyc09g091100.4	2102	1976	2810	675	1224	1098	32.7982	30.5714	36.862	10.6207	18.8252	17.7643	1.36e-07	-2.43713
Solyc10g083180.2	80	128	166	26	52	74	2.32072	3.7015	4.06991	0.746273	1.47618	2.24143	0.00425881	-2.43695
Solyc12g019010.2	756	860	1130	238	524	423	19.4841	21.9782	24.4991	6.19204	13.3174	11.2999	1.05e-05	-2.43645
Solyc01g005100.4	937	796	915	304	508	358	19.0942	16.0804	15.6883	6.25456	10.209	7.56094	2.2e-09	-2.43474
Solyc02g077760.2	111	116	72	39	52	38	15.5867	16.2629	8.48594	5.43013	7.18767	5.50244	0.000287722	-2.43331
Solyc11g072120.2	206	220	193	55	107	106	6.10274	6.46274	4.79976	1.62161	3.10951	3.2436	3.81e-05	-2.43308
Solyc04g080630.4	5383	5425	6834	1456	3204	2984	234.431	234.319	250.249	63.9932	137.525	134.858	8.28e-06	-2.43212
Solyc01g006370.3	2971	4141	6912	1643	2064	2260	13.0818	18.0844	25.5897	7.29931	8.9549	10.3255	7.6e-06	-2.43156
Solyc11g066380.3	1125	1513	1808	509	834	604	13.5698	18.107	18.3428	6.18795	9.91623	7.55723	1.13e-08	-2.42813
Solyc05g009330.3	250	454	518	123	172	222	7.3136	13.2061	12.7672	3.61637	4.9561	6.73028	0.000125344	-2.42798
Solyc11g042640.2	4815	5160	6548	1181	3021	2890	97.7555	103.895	111.774	24.1919	60.4541	60.8805	0.000113978	-2.42786
Solanum_lycopersicum_newGene_2072	67	69	66	23	32	32	0.771505	0.788755	0.642301	0.261741	0.361128	0.383592	0.000103682	-2.42655
Solyc09g010350.4	1098	1123	1100	396	552	527	14.7287	14.9308	12.406	5.3491	7.29369	7.33331	4.45e-14	-2.42505
Solyc08g082590.3	743	1054	1031	443	433	370	13.7121	19.2987	16.0074	8.25258	7.87052	7.07991	3.96e-13	-2.42486
Solyc01g087780.2	5488	7581	10192	1615	4424	3845	53.4646	73.2508	83.4834	15.875	42.4819	38.8654	0.000371918	-2.42458
Solyc03g118470.4	3413	1903	3024	1172	1301	1195	67.9786	37.5809	50.6379	23.5446	25.5449	24.6916	1.79e-07	-2.42332
Solyc01g066440.3	425	587	876	234	228	340	11.7701	16.11	20.3926	6.52536	6.20413	9.7496	2.47e-05	-2.4227
Solyc03g113730.3	4271	4596	3903	1218	1914	2455	171.379	182.923	131.693	49.3045	75.6981	102.246	3.42e-06	-2.41838
Solyc02g080670.3	34	161	265	45	50	77	0.445478	2.14178	2.99361	0.60855	0.66193	1.07272	0.0324365	-2.4174
Solyc04g077370.2	164	239	164	85	79	84	1.6784	2.42296	1.41087	0.872413	0.791283	0.884238	2.92e-06	-2.41564
Solyc01g006020.4	9341	6719	6290	1603	4007	4090	264.129	188.42	149.528	45.7134	111.666	120.008	0.000492679	-2.41446
Solyc06g054320.1	51	97	269	44	61	57	2.51247	4.74895	11.2019	2.19696	2.96414	2.92829	0.0183601	-2.41366
Solyc07g054140.3	61	58	102	30	33	31	1.31131	1.24236	1.8569	0.644051	0.695768	0.691897	0.0003535	-2.4121
Solyc05g005140.4	360	472	549	138	255	212	3.77316	4.90338	4.83713	1.45429	2.62535	2.29879	1.34e-06	-2.41093
Solyc03g112760.3	6351	6928	7520	1137	4321	3438	45.4941	49.214	45.2854	8.21144	30.5027	25.5543	0.00148895	-2.41083
Solyc02g077990.3	10567	10844	16430	3325	6084	6962	251.167	255.615	328.321	79.7347	142.516	171.723	1.65e-05	-2.41051
Solyc06g074370.3	496	604	1029	231	357	330	11.6785	14.1031	20.3839	5.47563	8.27944	8.06219	1.37e-05	-2.41015
Solyc10g081470.2	2529	2435	3616	736	1535	1467	37.3607	35.6725	44.9126	10.9724	22.3467	22.4933	1.52e-05	-2.40703
Solyc01g098500.3	4204	3793	4470	717	2425	2211	66.9941	59.9438	59.8896	11.5261	38.0933	36.5519	0.00115147	-2.40663
Solyc04g082920.4	873	877	1442	222	521	612	8.71483	8.68764	12.1152	2.23672	5.13131	6.33967	0.000698858	-2.40633
Solyc01g007130.3	1435	1496	1707	478	787	791	11.1915	11.5699	11.1934	3.75675	6.04598	6.39997	8.1e-09	-2.40441
Solyc03g034170.4	1916	2158	3415	639	1391	1212	44.0893	49.2468	66.0658	14.8272	31.5547	28.9245	5.23e-05	-2.40416
Solyc12g010870.3	2433	2268	2460	809	1335	1065	56.9376	52.6323	48.4033	19.0934	30.7923	25.868	5.11e-11	-2.40354
Solyc01g108330.2	56	64	126	21	46	35	1.88904	2.17287	3.61544	0.691947	1.51962	1.22805	0.00473	-2.40301
Solyc06g007170.4	147	549	822	194	200	215	2.55364	9.49612	12.0572	3.41109	3.43127	3.87563	0.00903059	-2.40278
Solyc03g082890.3	2211	2292	3196	667	1239	1442	58.6003	60.2398	71.222	17.8266	32.3524	39.6496	1.9e-05	-2.40181
Solyc06g051080.4	4205	4982	7778	1813	2758	2828	37.9212	44.5612	58.9775	16.4951	24.5146	26.4632	9.36e-07	-2.40157
Solyc02g092700.3	6203	6949	6568	2024	3502	3269	101.31	112.56	90.1843	33.3468	56.3662	55.4006	8.43e-09	-2.40013
Solyc03g043770.4	308	399	622	100	169	285	4.75843	6.11831	8.10406	1.5572	2.58161	4.58093	0.00213639	-2.39883
Solyc05g008440.3	2933	3588	2320	1294	1382	1286	81.414	98.7865	54.1506	36.2401	37.8216	37.0302	3.36e-09	-2.39755
Solyc08g005245.1	32	46	53	6	16	29	2.20763	3.09953	3.07765	0.37095	1.05029	2.03133	0.0304561	-2.39677
Solyc11g010630.4	1487	1591	1252	608	711	632	9.73976	10.337	6.89498	4.01532	4.59205	4.29166	4.96e-13	-2.39667
Solanum_lycopersicum_newGene_769	146	164	211	55	83	90	4.33741	5.01679	5.25473	1.62466	2.40672	2.77691	6.27e-06	-2.39664
Solyc04g079560.3	156	237	392	110	76	141	1.90348	2.8677	4.02012	1.34973	0.91232	1.78875	0.00127965	-2.39587
Solyc11g010130.3	182	98	111	49	73	49	4.93327	2.6098	2.5086	1.3277	1.93747	1.36585	0.000822533	-2.39541
Solyc03g093690.3	12681	12254	14951	4450	6567	6786	316.988	303.784	314.21	112.227	161.79	176.027	4.1e-11	-2.39533
Solyc03g058190.3	6268	5925	6957	1947	2939	3593	66.1329	62.0009	61.7102	20.7299	30.5624	39.3424	1.47e-07	-2.39468
Solyc01g096410.4	122	159	214	17	54	121	1.3579	1.76328	2.00897	0.181109	0.58905	1.39612	0.0310402	-2.39144
Solyc10g005110.3	8110	8735	13901	2875	5069	5465	141.433	151.076	203.816	50.5849	87.1329	98.8955	1.18e-05	-2.39135
Solyc09g048980.4	89	102	174	39	49	67	1.46392	1.66687	2.40912	0.63723	0.79378	1.1428	0.00071568	-2.39003
Solyc08g069230.3	290	314	510	81	167	224	12.6414	13.5436	18.6996	3.52754	7.15913	10.1411	0.00135266	-2.38972
Solyc01g103350.3	977	1334	1854	731	571	520	8.49563	11.5072	13.5661	6.41493	4.89125	4.69208	5.41e-07	-2.38965
Solyc01g106090.3	920	1013	1252	252	563	578	21.7752	23.7924	24.9148	6.02039	13.1446	14.195	6.94e-05	-2.38807
Solyc03g113620.3	4717	4348	3606	1286	2106	2274	96.479	88.1908	62.0096	26.5215	42.4562	48.2542	1.7e-06	-2.38636
Solyc09g083290.3	8170	7722	7959	2514	4345	3871	204.77	191.945	167.706	63.5784	107.346	100.69	4.43e-09	-2.38615
Solyc02g078040.3	216	217	530	81	127	190	5.88021	5.87618	12.166	2.22533	3.41561	5.37639	0.00415555	-2.38589
Solyc02g070040.1	97	41	137	47	24	40	2.59384	1.07282	3.08254	1.274	0.634831	1.09898	0.0138284	-2.3857
Solyc11g072080.1	90	172	293	41	93	94	2.06108	3.89685	5.64492	0.93445	2.09884	2.22749	0.00782532	-2.38432
Solyc02g064940.1	9542	10696	13535	2731	7251	4922	188.582	209.659	224.901	54.4653	141.259	100.941	6.37e-05	-2.38334
Solyc02g087190.1	719	844	1709	397	526	491	20.0801	23.3803	40.1347	11.1711	14.4712	14.219	5.43e-05	-2.38311
Solyc06g054010.3	1501	1595	1810	573	981	658	14.9135	15.7147	15.1172	5.74217	9.60409	6.77848	7.11e-10	-2.3818
Solyc01g099410.3	768	1143	2127	470	526	720	30.1928	44.5573	70.3157	18.6221	20.3902	29.3618	0.000378832	-2.38026
Solyc05g015390.3	3610	3057	3407	1225	2133	1200	78.7256	66.1308	62.4773	26.957	45.8473	27.1637	1.49e-07	-2.37826
Solyc08g006540.4	1713	1997	3272	474	991	1490	47.8031	55.2581	76.7568	13.3225	27.243	43.1219	0.0018348	-2.37743
Solyc04g007640.3	1015	1068	1330	444	485	598	11.461	11.9619	12.6264	5.05655	5.3979	7.00308	9.12e-12	-2.37742
Solyc04g008720.4	684	833	1409	308	471	498	6.09356	7.36252	10.5663	2.76802	4.13707	4.60309	2.74e-05	-2.37414
Solyc11g008620.2	8849	10671	17804	2845	7085	6237	157.404	188.246	266.264	51.063	124.223	115.128	0.000413747	-2.37409
Solyc03g007860.1	1002	692	861	140	432	524	49.503	33.8647	35.7582	6.93969	21.0147	26.8601	0.0040475	-2.37355
Solyc06g068480.3	3424	3377	5300	880	2118	2264	63.6465	62.2572	82.837	16.4984	38.7996	43.6683	0.000352617	-2.37284
Solyc06g005350.3	87	119	179	43	64	60	3.73243	5.08346	6.49242	1.87338	2.69577	2.68639	0.000249896	-2.37178
Solyc10g044710.2	1038	1016	1369	282	648	585	29.2886	28.4297	32.4701	8.00599	18.0242	17.1057	4.64e-05	-2.37061
Solyc05g008940.3	1412	1293	1118	532	628	581	16.5031	14.9862	10.9845	6.26275	7.22386	7.03694	5.66e-12	-2.37044
Solyc02g068040.3	237	195	88	61	86	80	14.8367	12.1043	4.64045	3.81343	5.27528	5.16333	0.00389713	-2.36992
Solyc03g034010.3	192	192	329	87	83	138	5.58557	5.53687	8.03825	2.55704	2.36729	4.14834	0.000203746	-2.36874
Solyc04g011440.4	447	418	624	171	357	128	4.87562	4.52582	5.72518	1.88326	3.83368	1.45029	0.000633408	-2.36868
Solyc09g009830.3	1761	1521	1705	478	763	981	41.0215	35.1476	33.4038	11.2273	17.5111	23.7178	7.61e-06	-2.36863
Solyc12g019100.2	488	567	622	216	262	279	13.4885	15.5589	14.4615	6.01546	7.13047	7.99088	1.97e-13	-2.36862
Solyc03g119960.3	1479	1677	2110	282	1138	855	26.3467	29.6405	31.6131	5.06585	19.9821	15.808	0.00290279	-2.36676
Solyc02g086840.3	533	534	1042	232	332	358	5.98479	5.94858	9.84036	2.62478	3.67755	4.17289	4.32e-05	-2.36548
Solyc07g061900.3	5686	5402	9177	1859	3312	3741	129.026	121.563	175.08	42.5504	74.0786	88.0967	3.39e-05	-2.36544
Solyc11g011260.1	7260	8242	9939	3191	4182	4136	113.275	127.532	130.377	50.2299	64.3194	66.9668	1.57e-15	-2.36542
Solyc09g098190.3	212	272	412	121	132	142	3.04191	3.86546	4.96971	1.75413	1.86598	2.11482	3.82e-06	-2.36438
Solyc08g081770.3	1881	1758	2300	532	1037	1079	29.6667	27.496	30.4889	8.45227	16.1193	17.6604	8.35e-06	-2.36361
Solyc07g055930.3	709	606	677	213	314	369	8.81954	7.4804	7.07981	2.6741	3.84074	4.76505	4.79e-07	-2.36255
Solyc09g008460.3	584	495	559	203	280	262	13.3857	11.2466	10.7734	4.6937	6.3111	6.21854	7.36e-11	-2.36187
Solyc01g094020.3	391	405	546	177	280	146	4.98521	5.12392	5.84681	2.2772	3.51242	1.9227	2.53e-06	-2.36149
Solyc07g062190.4	8588	8243	10450	2745	4345	5134	251.08	239.008	256.867	80.9841	125.195	155.768	4.16e-07	-2.36013
Solyc06g008030.3	4172	3123	1895	905	1731	1487	66.3288	49.2398	25.3301	14.5151	27.1228	24.5259	0.00056029	-2.36005
Solyc03g062660.4	184	183	154	39	101	90	1.87094	1.84684	1.3209	0.394332	1.01694	0.950504	0.00111391	-2.3572
Solyc05g005010.3	891	844	1003	367	496	389	13.5352	12.7186	12.8095	5.61711	7.42926	6.12529	1.33e-16	-2.35695
Solyc02g077710.1	18990	26960	25600	11982	8302	11696	508.828	716.424	576.712	323.944	219.26	325.204	3.42e-08	-2.35601
Solyc11g066110.2	10769	9085	10898	3054	5314	5523	148.601	124.33	126.436	42.5178	72.2764	79.091	4.9e-07	-2.35566
Solyc08g081940.3	1436	1811	2145	458	1136	812	17.8885	22.3852	22.4732	5.7483	13.9537	10.4965	5.64e-05	-2.35562
Solyc08g005980.3	1037	1219	1578	426	565	720	19.4424	22.6703	24.8713	8.04898	10.4385	13.9974	4.2e-07	-2.3548
Solyc09g098290.3	1035	2624	4625	807	1290	1368	7.99501	20.1147	30.055	6.29143	9.82264	10.9716	0.00477973	-2.35423
Solyc07g006030.4	10393	12071	16095	2652	7512	6806	42.9143	49.4315	55.8756	11.0496	30.5737	29.1651	0.00049292	-2.35127
Solyc03g111610.3	9309	9467	15554	2448	6448	6143	193.696	195.359	272.109	51.3967	132.248	132.64	0.000558349	-2.35108
Solyc07g063430.3	26440	18086	14015	5273	12495	8670	457.626	310.455	203.943	92.0802	213.151	155.717	0.000529684	-2.35103
Solyc10g074820.1	158	237	442	80	118	157	4.55421	6.78855	10.7579	2.3357	3.35875	4.69397	0.0025732	-2.35081
Solyc03g111700.3	3882	3543	3525	740	2028	2090	81.3262	73.6034	62.0889	15.6246	41.868	45.4361	0.000618053	-2.35078
Solyc11g020230.1	1059	454	991	425	347	336	12.4832	5.30763	9.82357	5.05925	4.02376	4.10715	0.00026605	-2.34985
Solyc04g008970.3	41	106	88	37	41	22	0.881337	2.26117	1.57955	0.794024	0.858228	0.485888	0.00683738	-2.34929
Solyc02g090580.3	702	861	1215	240	642	350	7.93645	9.65387	11.5516	2.73857	7.15302	4.10049	0.00039508	-2.34831
Solyc01g100650.3	4551	4630	5496	1504	2716	2446	34.3919	34.7024	34.9239	11.4662	20.2321	19.1783	3.97e-08	-2.34767
Solyc09g092460.4	791	778	823	313	417	369	6.71699	6.54818	5.87451	2.6813	3.48688	3.24848	6.7e-17	-2.34689
Solyc03g071620.2	1347	1900	2588	674	1036	904	39.0303	54.6122	63.0625	19.6962	29.5982	27.1924	6.92e-07	-2.34687
Solyc07g056270.3	1768	2592	3346	750	1416	1267	20.5417	29.8708	32.6926	8.7963	16.2128	15.2833	1.72e-05	-2.34686
Solyc06g008050.4	198	323	212	99	85	140	2.89724	4.68073	2.59874	1.46121	1.21277	2.11541	0.000208774	-2.34493
Solyc12g088930.1	192	405	459	98	170	190	6.40947	13.4171	12.8831	3.28123	5.59084	6.58358	0.0010743	-2.34456
Solyc01g097030.3	842	748	887	383	497	249	7.97991	7.03811	7.07198	3.65846	4.64032	2.44772	8.81e-07	-2.3444
Solyc01g010030.3	660	697	1040	256	478	346	7.55119	7.90778	10.0025	2.95351	5.38258	4.1002	2.67e-06	-2.34357
Solyc03g113460.1	977	984	1444	453	615	481	33.6022	33.5827	41.7839	15.7091	20.843	17.1557	8.91e-11	-2.34324
Solyc08g082660.2	1262	1337	1977	496	734	823	19.9405	20.9519	26.2652	7.89974	11.4335	13.5009	6.53e-07	-2.34317
Solyc01g094340.3	5657	4590	4552	1001	2258	3257	61.8144	49.747	41.8163	11.032	24.3173	36.9276	0.00149502	-2.34253
Solyc10g081840.3	146	178	131	67	68	71	8.64248	10.4086	6.50833	3.96789	3.94034	4.31242	2.66e-06	-2.34251
Solyc11g010920.3	70	124	264	58	42	86	0.513825	0.905721	1.63665	0.426672	0.303473	0.653099	0.0142914	-2.34138
Solyc08g066180.3	1656	2297	3451	834	1298	1172	20.8843	28.7429	36.6064	10.6083	16.138	15.3389	5.45e-06	-2.34068
Solyc02g071220.3	660	573	576	378	125	280	19.6227	16.8808	14.4008	11.3418	3.65816	8.63096	0.00207212	-2.34043
Solyc06g068670.3	11607	10480	15040	3354	6251	7039	242.615	217.256	264.323	70.7408	128.79	152.694	1.63e-05	-2.34037
Solyc12g088320.2	294	275	534	58	196	213	13.6487	12.6827	20.8904	2.6944	8.95563	10.2916	0.00856644	-2.34007
Solyc06g073180.3	5396	6621	6044	2108	3419	2769	114.349	139.142	107.675	45.066	71.4131	60.8842	1.12e-10	-2.33988
Solyc01g108300.3	2897	2392	2136	638	1526	1209	46.1294	37.7764	28.6001	10.2496	23.9493	19.9774	0.000116497	-2.33819
Solyc12g057080.2	1336	1640	2596	672	894	927	25.2063	30.6797	41.1878	12.7865	16.6227	18.1419	1.04e-06	-2.33812
Solyc09g009470.1	469	247	311	107	164	189	10.2461	5.35667	5.70894	2.34657	3.52018	4.28948	0.00050894	-2.33766
Solyc07g039380.3	163	219	342	115	88	115	6.39625	8.54744	11.3212	4.55897	3.40848	4.6824	0.000100385	-2.33644
Solyc04g058100.3	75	38	90	16	51	18	4.04141	2.01253	4.08136	0.825439	2.68386	0.964377	0.0253581	-2.33599
Solyc11g069960.2	592	731	1086	340	488	255	7.28693	8.92748	11.2427	4.21616	5.91253	3.24678	1.63e-05	-2.33533
Solyc03g097690.3	138	243	319	113	96	99	1.82348	3.19031	3.55478	1.50395	1.25292	1.35929	0.000138333	-2.33494
Solyc12g099970.2	4842	4942	3675	1314	1997	2763	118.978	120.443	75.9133	32.5721	48.3622	70.4433	5.88e-05	-2.33471
Solyc03g098110.4	1720	2027	2191	684	1055	981	31.6255	36.962	33.8766	12.691	19.1179	18.7095	7.63e-11	-2.33447
Solyc11g012385.1	221	140	101	51	28	112	7.89958	4.9509	3.02848	1.81121	0.9637	4.12726	0.026599	-2.33026
Solyc01g087730.4	17704	15268	16814	4115	8638	9728	334.786	286.338	267.329	78.5024	160.994	190.899	7.7e-05	-2.32984
Solyc09g059990.1	280	203	303	53	124	166	10.3712	7.44139	9.41121	1.96269	4.50048	6.37889	0.00325371	-2.32948
Solyc05g013530.4	8969	6947	5901	3089	3857	3166	261.956	201.22	144.883	91.0372	111.038	95.9396	4.96e-08	-2.32704
Solyc01g091700.4	197	203	174	93	17	120	4.99967	5.11681	3.70342	2.38686	0.42346	3.14685	0.0351109	-2.32676
Solyc01g109370.3	332	375	476	87	239	201	5.86857	6.57444	7.07379	1.53671	4.16686	3.68802	0.000652801	-2.32631
Solyc06g051940.4	98	148	205	94	75	14	1.63831	2.46514	2.89029	1.59056	1.22936	0.234834	0.0348425	-2.32568
Solyc03g120160.1	57	38	44	24	23	14	6.33116	4.19138	4.09785	2.69542	2.50556	1.55625	0.00488484	-2.32489
Solyc11g013810.3	8776	5777	10565	5817	2451	2729	73.5029	47.978	74.3905	49.1547	20.2259	23.7192	0.00115694	-2.32319
Solyc10g047260.1	242	154	224	67	88	123	34.675	21.8615	27.0084	9.65822	12.373	18.2724	0.000291449	-2.31969
Solyc06g007990.4	345	272	410	122	124	213	13.2941	10.3957	13.2654	4.72612	4.68682	8.49951	0.000105325	-2.31803
Solyc08g013720.4	367	393	704	90	221	317	10.0137	10.6227	16.1401	2.46333	5.94005	8.97844	0.00623321	-2.31549
Solyc08g007000.3	504	603	795	253	345	276	5.40669	6.41502	7.17776	2.73776	3.64425	3.07454	9.24e-10	-2.31381
Solyc01g068470.4	896	699	816	192	388	504	16.4966	12.7639	12.6205	3.56256	7.03224	9.62925	0.000508982	-2.31377
Solyc06g074670.4	1550	1827	2808	985	888	935	22.9294	26.8068	34.9371	14.7095	12.9446	14.3555	2.42e-08	-2.31288
Solyc00g500041.1	86	90	107	64	31	29	2.14755	2.24097	2.26343	1.6252	0.754081	0.734909	0.00277002	-2.31086
Solyc11g005420.3	175	131	212	97	64	72	6.51324	4.8514	6.6417	3.64365	2.34722	2.76926	7.42e-05	-2.31081
Solyc07g044880.3	302	448	484	151	187	223	6.69078	9.84459	9.00885	3.37207	4.07853	5.11147	1.2e-06	-2.31022
Solyc01g091800.3	1711	1604	2309	457	986	1092	31.6497	29.4287	35.9175	8.52245	17.9681	20.9623	0.000177729	-2.30803
Solyc12g044410.2	1805	1673	1999	633	986	923	15.9436	14.6557	14.8454	5.63678	8.5791	8.458	3.68e-10	-2.30672
Solyc11g066820.2	1834	3539	6638	1226	1986	2000	24.9927	47.8339	76.0526	16.8564	26.6721	28.2813	0.00228097	-2.30667
Solyc07g014640.3	247	273	505	91	167	194	4.19481	4.59996	7.21642	1.55525	2.79737	3.41235	0.00107151	-2.30643
Solyc04g076290.3	370	435	423	114	205	240	5.70383	6.64761	5.47621	1.77327	3.10538	3.83979	4.53e-05	-2.30584
Solyc10g085550.3	1864	2101	3730	612	1214	1567	27.9795	31.2846	47.0925	9.26162	17.9658	24.4064	0.00106324	-2.30492
Solyc06g064460.4	4058	3662	3797	1422	1970	1979	99.3451	88.9139	78.1587	35.1148	47.5424	50.2653	1.35e-11	-2.30491
Solyc02g070530.4	618	926	968	365	383	408	7.45581	11.0799	9.82705	4.44096	4.55098	5.1105	7.66e-10	-2.30235
Solyc01g150176.1	3521	3450	2189	1032	1858	1372	141.087	137.104	73.7517	41.692	73.3844	57.0338	3.5e-05	-2.30089
Solyc01g079880.3	45575	42114	40107	15068	24061	20690	1057.73	969.351	782.598	352.857	550.416	498.293	1.12e-09	-2.30071
Solyc07g009150.3	2039	1868	2517	632	1260	1069	28.7257	26.0955	29.8062	8.97411	17.4879	15.6264	2.65e-06	-2.30023
Solyc03g114310.3	315	291	370	53	209	170	4.79362	4.39017	4.73405	0.812234	3.13952	2.68743	0.00591322	-2.29998
Solyc01g097910.2	2177	2238	2896	499	1431	1362	55.4208	56.5023	61.9687	12.8065	35.8905	35.9746	0.000816035	-2.29941
Solyc11g042950.1	3304	3914	4448	840	2379	2068	46.6674	54.8246	52.8201	11.9704	33.1079	30.303	0.000455725	-2.29824
Solyc08g081220.1	775	1355	1733	504	554	681	12.8293	22.2474	24.1171	8.40697	9.03041	11.694	2.57e-05	-2.29804
Solyc06g076010.3	132	174	205	61	91	82	5.22922	6.81867	6.8243	2.41224	3.53968	3.3515	4.76e-06	-2.29777
Solyc10g078160.2	744	900	1327	235	566	533	9.86687	11.8301	14.7891	3.13612	7.38997	7.33535	0.000509432	-2.29763
Solyc09g082500.4	756	1305	2471	577	693	722	7.74176	13.2548	21.2795	5.96063	6.99291	7.6739	0.000875467	-2.2971
Solyc05g053400.3	240	384	335	144	99	187	5.65496	8.98782	6.64098	3.41291	2.29291	4.57272	0.000207604	-2.29649
Solyc06g074190.3	632	528	568	196	338	272	8.49675	7.04595	6.42499	2.65361	4.47309	3.78903	2.92e-07	-2.29643
Solyc03g031940.4	953	3852	4483	944	1975	1073	12.0621	48.3766	47.7326	12.0627	24.6452	14.0955	0.0115472	-2.29564
Solyc08g075920.4	2868	2549	2631	600	1488	1584	57.4678	50.6527	44.3211	12.1194	29.3741	32.9236	0.000466105	-2.29217
Solyc06g062520.1	623	604	689	210	322	356	29.7896	28.6737	27.6988	10.0955	15.1614	17.6601	1.89e-07	-2.2917
Solyc12g011020.2	273	367	485	143	168	202	7.72313	10.3108	11.5484	4.06768	4.69114	5.92859	3.26e-06	-2.29138
Solyc04g007110.4	736	774	1149	249	566	402	15.2151	15.8837	19.9832	5.19483	11.5301	8.61489	7.2e-05	-2.29121
Solyc03g078610.3	1593	1859	2323	667	1099	916	33.6878	39.0085	41.3203	14.2244	22.9055	20.1084	8.44e-09	-2.2909
Solyc09g075550.3	38	104	220	56	40	51	0.270989	0.736749	1.32385	0.403749	0.279167	0.376216	0.0291774	-2.29051
Solyc02g085480.4	42	110	131	26	31	61	1.24225	3.25167	3.28019	0.782226	0.893316	1.87526	0.0211399	-2.28889
Solyc06g084610.4	252	394	594	122	231	203	6.88628	10.7014	13.6679	3.35781	6.2276	5.76739	0.000563775	-2.28785
Solyc02g063190.2	53	106	147	34	50	50	2.59977	5.15825	6.07446	1.69221	2.38714	2.54404	0.00422375	-2.28632
Solyc09g005120.3	368	561	874	86	171	482	4.63408	7.01752	9.26747	1.0884	2.12124	6.30161	0.0299377	-2.28549
Solyc03g120170.1	74	112	111	45	51	40	5.89015	8.88997	7.50563	3.59995	4.03466	3.33648	5e-05	-2.28548
Solyc12g010840.2	7753	6705	9260	2386	3868	4671	93.3452	80.0532	93.7333	28.9807	45.9029	58.3503	5.92e-06	-2.28513
Solyc11g005340.3	646	821	907	144	568	356	19.9659	25.1865	23.5926	4.48325	17.3052	11.4139	0.00373319	-2.28506
Solyc04g071650.4	4527	5523	10131	2232	3453	3448	31.483	38.0924	59.2395	15.6628	23.6705	24.8855	6.98e-05	-2.28242
Solyc07g064230.4	162	277	383	124	123	124	2.59988	4.4037	5.16696	1.99642	1.93522	2.05274	0.000122299	-2.28101
Solyc06g050840.3	383	538	543	108	333	225	12.3923	17.2691	14.7702	3.52577	10.6286	7.56147	0.00133821	-2.28083
Solyc01g005550.3	5533	6035	6570	2140	3362	3018	73.3757	79.371	73.2553	28.6253	43.9383	41.5359	2.8e-11	-2.28064
Solyc07g049370.2	185	407	689	152	103	280	3.08765	6.74946	9.69811	2.5679	1.70087	4.86967	0.016074	-2.28029
Solyc03g113920.4	2000	3371	5455	1412	1863	1614	24.5582	41.0492	56.3232	17.4896	22.5496	20.5617	0.000114292	-2.27928
Solyc07g006630.4	11750	14268	11816	4656	5850	7178	244.131	294.007	206.406	97.6019	119.787	154.755	1.48e-08	-2.27907
Solanum_lycopersicum_newGene_280	237	282	434	108	190	139	5.22517	6.14852	8.00448	2.54879	4.10762	3.17212	4.56e-05	-2.27845
Solyc08g067840.3	2976	2379	3716	793	1591	1770	59.3117	47.0238	62.2841	15.94	31.2501	36.6015	0.00013261	-2.27814
Solyc12g057000.1	111	138	171	60	43	85	6.66781	8.17204	8.61995	3.59999	2.51992	5.29366	0.000698794	-2.27801
Solyc07g041730.4	288	180	243	81	128	121	8.27284	5.11566	5.87103	2.34986	3.60184	3.60707	7.31e-05	-2.27501
Solyc01g098080.3	871	911	1050	383	474	477	8.86557	9.19155	8.98658	3.93116	4.74759	5.03594	1.11e-16	-2.27494
Solyc08g077430.3	4455	3775	4785	1282	2469	2320	26.2733	22.0784	23.7251	7.62712	14.3511	14.1934	3.74e-06	-2.27479
Solyc08g005090.2	86	102	110	28	42	64	2.90185	3.41742	3.11336	0.952604	1.37038	2.22754	0.00164219	-2.27346
Solyc12g010950.2	110	67	81	41	36	41	2.41794	1.46218	1.49727	0.897847	0.779011	0.917438	0.000805207	-2.27326
Solyc01g067290.3	3061	3400	5405	809	2128	2381	52.5148	57.8375	77.957	13.9965	35.9728	42.3778	0.00189075	-2.27308
Solyc03g112990.1	934	968	1173	352	488	592	35.3205	36.2723	37.2851	13.4328	18.18	23.1979	1.29e-07	-2.27124
Solyc02g014150.4	6432	6644	11012	2248	4082	4671	114.697	117.509	165.113	40.4506	71.7543	86.4413	0.000109381	-2.26868
Solyc01g081570.3	4834	7764	8641	2585	3945	3355	64.0434	102.011	96.2497	34.5501	51.5157	46.1294	3.76e-07	-2.26743
Solyc07g038160.4	350	426	448	150	250	176	8.76906	10.5944	9.44121	3.78737	6.16419	4.5763	6.77e-08	-2.26677
Solyc10g078370.2	86	58	116	31	51	36	1.19086	0.790418	1.34567	0.429551	0.685792	0.509825	0.00169412	-2.26544
Solyc11g045530.3	249	202	344	39	130	177	7.03334	5.64974	8.18702	1.09932	3.60551	5.19126	0.0155901	-2.26312
Solyc11g064750.3	625	572	756	81	383	396	11.3223	10.2737	11.5265	1.46611	6.84664	7.44269	0.0148036	-2.26203
Solyc08g041710.3	1252	1406	1896	594	794	751	16.159	18.003	20.5807	7.73626	10.1017	10.0554	1.07e-10	-2.26159
Solyc03g117740.3	1942	2483	4366	858	1565	1573	43.4805	55.1527	82.2108	19.3873	34.5403	36.5487	0.000310307	-2.26031
Solyc09g082580.4	1389	1333	1493	584	813	612	21.351	20.3277	19.2995	9.05546	12.322	9.75072	2.81e-15	-2.26014
Solyc11g008780.3	1082	1065	1224	293	602	669	19.7197	19.2487	18.7649	5.38509	10.8203	12.6557	9.68e-05	-2.25936
Solyc07g063740.2	317	551	714	124	256	326	2.49435	4.30056	4.72271	0.978545	1.98592	2.65763	0.00302493	-2.25924
Solyc04g076870.4	7541	8690	13132	3452	4849	5326	108.058	123.501	158.214	49.9064	68.4918	79.1921	8.79e-07	-2.25864
Solyc11g012450.2	1165	882	916	301	521	568	14.7134	11.0456	9.72596	3.83346	6.48366	7.43804	3.78e-05	-2.25821
Solyc05g010680.2	78	75	120	24	33	63	1.74941	1.68035	2.27263	0.527035	0.7334	1.46431	0.0083872	-2.25659
Solyc01g104950.4	13407	29900	30608	4778	12798	15275	128.843	284.976	247.308	46.3307	121.228	152.335	0.00580245	-2.25654
Solyc10g009580.4	2086	1627	1697	327	1387	774	37.2961	28.8518	25.5067	5.88576	24.4343	14.3515	0.00569207	-2.25532
Solanum_lycopersicum_newGene_1767	74	97	83	21	52	43	0.826607	1.06973	0.774845	0.23088	0.572686	0.497741	0.00284061	-2.25526
Solyc06g076480.4	1693	1809	2345	674	990	1080	53.0216	56.1889	61.7526	21.3026	30.571	35.0948	4.82e-08	-2.25443
Solyc07g064150.4	16409	14017	9931	6631	6648	5923	128.202	108.609	65.2306	52.2748	51.1939	48.0183	1.04e-06	-2.25417
Solyc08g065360.3	1228	1535	2015	527	871	834	13.5228	16.7608	18.6594	5.85358	9.44741	9.52815	1.29e-06	-2.2533
Solanum_lycopersicum_newGene_1169	179	269	424	152	161	82	4.39957	6.65397	8.24387	3.8219	3.9387	2.09758	0.0013823	-2.25253
Solyc06g005590.4	1561	1690	1705	924	729	697	15.4225	16.5564	14.1581	9.20408	7.09589	7.14135	2.55e-12	-2.25123
Solyc03g113240.3	4367	5042	6976	1608	2809	3185	133.178	152.499	178.863	49.4648	84.4269	100.793	2.5e-05	-2.24995
Solyc02g080530.3	3677	4042	5462	1603	2611	2017	74.8026	81.5586	93.4425	32.9022	52.3667	42.5707	9.21e-09	-2.24943
Solyc04g011900.4	1597	1619	2198	414	902	1162	37.4935	37.6952	43.3987	9.80663	20.8713	28.2967	0.000833102	-2.24922
Solyc06g051400.3	4939	8024	11041	3342	4468	3342	74.4919	120.022	140.005	50.8488	66.4117	52.2994	7.04e-06	-2.24897
Solyc09g076050.4	12111	15116	17905	7456	7797	6158	177.146	219.275	220.185	110.035	112.412	93.4617	1.6e-14	-2.24838
Solyc12g015630.2	164	122	205	49	112	66	7.90599	5.79603	8.28431	2.38632	5.31811	3.27267	0.00114407	-2.2483
Solyc04g057940.4	311	434	428	123	223	204	1.82945	2.53572	2.1185	0.731001	1.2938	1.24637	1.16e-05	-2.24804
Solyc08g006310.3	634	934	1287	303	487	526	6.77338	9.89413	11.5613	3.26551	5.12735	5.82317	7.87e-05	-2.24735
Solyc10g047950.2	911	1164	1358	335	585	677	21.5943	27.3732	27.0735	8.02011	13.6684	16.6482	3.21e-05	-2.24684
Solyc01g079770.2	197	224	275	95	137	97	4.10497	4.63261	4.81906	1.98495	2.81169	2.09726	1.41e-07	-2.24606
Solyc11g031970.2	654	591	593	161	376	327	16.7347	15.0049	12.743	4.14115	9.47435	8.66334	0.00017444	-2.24487
Solyc12g009580.2	582	929	1220	282	525	456	24.4159	38.6546	43.04	11.939	21.697	19.8294	0.000136363	-2.24336
Solyc05g008950.4	3701	3660	4205	1091	1835	2469	38.464	37.7183	36.7371	11.4324	18.7931	26.6177	5.61e-05	-2.24324
Solyc02g078670.3	7382	6977	8583	2230	4697	3920	59.4195	55.696	58.0886	18.11	37.2692	32.7466	6.62e-06	-2.24278
Solyc11g018500.3	104	202	249	83	90	81	1.10162	2.12393	2.22582	0.88133	0.938793	0.888868	0.000456544	-2.24175
Solyc07g056310.3	192	347	476	98	168	193	4.43134	7.95867	9.25625	2.28254	3.82437	4.62935	0.00179808	-2.24107
Solyc09g009900.4	28	52	83	16	22	32	0.978616	1.80505	2.47804	0.539189	0.753702	1.15731	0.0219538	-2.23863
Solyc11g011840.2	971	1000	1226	466	610	457	20.3668	20.7915	21.6149	9.85622	12.5973	9.94339	4.16e-15	-2.23592
Solyc02g068090.3	6295	5800	9321	1992	3355	4555	194.119	177.374	241.667	61.9677	101.968	145.755	0.000215961	-2.23533
Solyc02g071940.1	73	67	79	41	36	25	6.82506	6.1814	6.18353	3.8527	3.2836	2.39023	0.000408188	-2.23524
Solyc04g076530.3	1324	1227	1339	529	659	680	14.9783	13.7601	12.7355	6.02867	7.34217	7.9783	4.54e-14	-2.23318
Solyc04g081490.3	20137	21666	25775	6462	13203	12294	337.308	359.931	362.997	109.214	217.976	213.706	9.6e-06	-2.23208
Solyc05g014310.3	5023	4903	5680	1460	2519	3339	137.235	132.867	130.486	40.2397	67.8217	94.6736	6.85e-05	-2.23074
Solyc02g094640.4	9563	8445	9586	3028	5121	5036	97.0083	84.9547	81.7495	30.9844	51.1991	53.0061	1.96e-07	-2.23055
Solyc09g065160.4	2899	2867	2855	887	1445	1756	25.5047	25.0072	21.1159	7.87401	12.5235	16.0228	8.05e-06	-2.22849
Solyc03g005060.4	355	388	605	166	252	217	2.78257	3.01906	3.99247	1.31243	1.94458	1.76517	3.65e-06	-2.22801
Solyc03g031680.3	428	671	679	253	317	275	6.02009	9.3525	8.02028	3.57985	4.38711	4.01176	3e-08	-2.22765
Solyc02g080600.1	179	167	214	69	100	97	24.7881	22.9263	24.9993	9.61472	13.6881	13.9075	9.9e-07	-2.22764
Solyc05g007090.4	928	1040	1269	233	722	553	17.842	19.8372	20.516	4.52245	13.6763	11.0253	0.00130868	-2.22656
Solyc08g082370.1	628	421	433	315	251	129	57.0725	37.9872	33.0585	28.9096	22.4332	12.142	0.00143331	-2.22624
Solyc11g006540.2	241	268	553	167	195	127	3.60629	3.989	6.9823	2.52539	2.88227	1.97415	0.000574368	-2.2257
Solyc06g082300.4	1109	1163	1970	242	795	875	19.2151	19.9857	28.6957	4.21789	13.5636	15.7266	0.00738391	-2.22553
Solyc07g005830.3	4755	4788	6236	1351	2730	3298	105.133	104.99	115.923	30.1351	59.4844	75.6587	0.000213706	-2.22364
Solyc02g076780.3	531	695	797	236	389	338	4.99934	6.49501	6.30706	2.23635	3.61094	3.29677	3.61e-07	-2.2223
Solyc02g069010.4	1563	1753	2882	739	1062	1109	31.9088	35.4982	49.4755	15.2183	21.3742	23.4958	6.71e-06	-2.22186
Solyc07g062260.3	645	794	1145	168	492	519	12.0372	14.6952	17.9655	3.14567	9.04763	10.0387	0.00403995	-2.22186
Solyc05g007790.3	379	312	484	74	241	224	11.7306	9.56984	12.5944	2.31242	7.34022	7.1976	0.00522727	-2.2214
Solyc10g024410.2	5902	5710	6416	2369	3148	3178	102.466	98.3196	93.6538	41.4921	53.8743	57.2603	2.28e-14	-2.22121
Solyc01g096250.2	427	365	732	186	286	242	9.60855	8.14503	13.8623	4.21077	6.34243	5.64789	6.51e-05	-2.22098
Solyc01g109010.3	83	111	99	70	11	42	1.70072	2.24578	1.69718	1.44724	0.203404	0.878615	0.0456897	-2.21992
Solyc04g082970.4	121	332	362	90	174	106	1.86977	5.10219	4.71785	1.39764	2.65708	1.70452	0.00619982	-2.21979
Solyc02g086730.3	8626	9344	14672	3144	5581	6514	415.045	445.902	593.548	152.632	264.681	325.234	0.000112415	-2.21958
Solyc01g105470.4	71	43	54	28	27	23	7.95624	4.75531	5.02992	3.06561	2.90894	2.61026	0.0032041	-2.21859
Solyc04g011500.3	4293	3902	5335	1922	2400	2198	75.1049	67.6893	78.4587	33.9203	41.379	39.8949	1.07e-15	-2.21856
Solyc02g077670.3	614	581	656	204	390	295	10.1464	9.52829	9.11661	3.38917	6.35767	5.05062	1.46e-06	-2.21837
Solyc06g076220.3	111	448	1060	264	165	234	2.41425	9.692	19.4472	5.80832	3.54428	5.28379	0.046578	-2.21756
Solyc02g087230.3	6411	5790	8485	2364	4076	3462	154.765	138.622	172.231	57.5804	96.9851	86.7187	2.5e-07	-2.215
Solyc06g006080.3	28622	20354	34408	7445	17943	14040	323.421	228.094	326.892	84.8824	199.847	164.637	0.000289723	-2.21479
Solyc01g080590.3	327	352	378	141	192	177	13.9908	14.9289	13.5739	6.05385	8.07429	7.84273	4.8e-11	-2.21371
Solyc07g045300.4	1801	1672	2260	562	1022	1134	32.9862	30.3717	34.8083	10.3844	18.4478	21.5466	2.67e-05	-2.213
Solyc07g042560.4	94	42	74	31	35	31	0.845756	0.375986	0.563482	0.280926	0.307247	0.290988	0.00588914	-2.21296
Solyc11g066510.3	148	189	120	39	92	83	5.98306	7.6088	4.06928	1.57476	3.65306	3.47651	0.00308712	-2.21259
Solyc08g082250.3	2830	4855	8804	2828	1882	2745	30.5818	52.036	79.9973	30.8357	20.0408	30.7798	0.00167973	-2.21191
Solyc12g008560.1	4024	4320	3013	1313	1629	2455	456.556	486.126	287.341	150.324	182.084	288.959	9.28e-05	-2.21165
Solyc02g091370.2	158	204	207	53	76	133	2.68074	3.4388	2.94933	0.896727	1.26831	2.33824	0.00233114	-2.21098
Solyc10g045190.3	644	681	641	255	383	316	49.2594	51.7185	41.2444	19.6964	28.901	25.0478	2.96e-10	-2.2104
Solyc11g045250.1	1658	1130	1012	457	699	675	23.685	16.0109	12.1511	6.58244	9.84774	10.0069	5.77e-05	-2.2093
Solyc05g005080.3	4034	6253	8439	2141	3283	3383	43.6325	67.0711	76.7426	23.368	34.9922	37.9687	3.19e-05	-2.20848
Solyc09g089690.3	3052	3122	3577	841	2072	1733	50.9334	51.6739	50.1864	14.1465	34.0777	30.0113	0.000130979	-2.20775
Solyc04g077340.3	1213	1509	1570	523	835	717	13.1176	16.1864	14.2691	5.69788	8.893	8.04579	3.15e-09	-2.20382
Solyc10g006130.1	2819	918	2137	986	583	1122	116.691	37.6903	74.3683	41.1877	23.7768	48.1876	0.00716061	-2.20259
Solyc09g007840.3	86	65	95	43	35	38	0.997285	0.751183	0.925408	0.498234	0.397669	0.457398	0.000311798	-2.20177
Solyc05g005540.4	89	175	224	25	118	73	1.12172	2.20709	2.38811	0.313181	1.47894	0.955694	0.0295655	-2.20153
Solyc03g025830.4	825	1165	1280	351	609	600	6.88241	9.64254	8.97882	2.95508	5.00734	5.19164	9e-06	-2.20111
Solyc12g005030.3	683	521	514	258	343	236	16.968	12.8444	10.7292	6.47021	8.38281	6.0804	8.77e-07	-2.20017
Solyc07g006230.1	137	222	318	63	109	138	9.49387	15.3255	18.614	4.35913	7.44753	9.95568	0.00340746	-2.19983
Solyc03g114030.3	1595	2281	3267	902	1315	1174	19.1143	27.118	32.9238	10.9095	15.5376	14.6024	6.27e-06	-2.19943
Solyc02g069630.3	405	583	764	209	283	335	3.55556	5.07508	5.63969	1.84525	2.44421	3.05005	3.37e-05	-2.19923
Solyc09g092670.3	2826	2531	2705	557	1952	1315	43.7231	38.8371	35.1848	8.69005	29.7639	21.0987	0.00237599	-2.19915
Solyc03g119150.4	5380	5164	7548	1080	3725	3586	125.167	119.161	147.647	25.3376	85.4134	86.5731	0.00458865	-2.19867
Solyc09g097870.4	3899	2690	3125	1609	1511	1599	58.8688	40.2744	39.6687	24.5	22.4846	25.0481	1.68e-08	-2.19739
Solyc01g105920.3	57	38	95	35	21	29	0.849133	0.551916	1.19037	0.5152	0.302691	0.440577	0.0130141	-2.19738
Solyc01g098410.4	405	576	745	365	281	162	6.13733	8.66333	9.49791	5.58752	4.19719	2.53676	0.000604706	-2.19724
Solyc12g008680.3	59	90	114	23	62	36	1.82697	2.76219	2.96787	0.692504	1.89002	1.12926	0.00841263	-2.19699
Solyc12g089230.2	218	293	289	111	150	126	2.46468	3.28545	2.74415	1.26246	1.66616	1.4712	2.7e-08	-2.19534
Solyc05g008230.3	4614	5366	4454	1450	2254	3181	50.2992	58.0148	40.8192	15.9441	24.2138	35.9861	0.000103886	-2.19522
Solyc07g053493.1	48	42	42	20	21	21	1.67147	1.44721	1.2348	0.696893	0.7025	0.740705	0.0024666	-2.19316
Solyc03g080060.1	5699	4796	4586	1496	3440	2385	81.5782	68.0813	55.1858	21.606	48.5289	35.4255	8.64e-05	-2.19306
Solyc01g105120.4	9198	9392	10558	4378	5655	4258	93.1641	94.3452	89.9125	44.7411	56.4593	44.75	9.33e-21	-2.19293
Solyc06g068680.3	697	545	458	214	342	272	6.94145	5.3774	3.8336	2.14616	3.34833	2.81022	2.6e-05	-2.19215
Solyc03g005230.3	24921	25300	29958	7299	16117	15065	449.98	453.053	454.786	132.97	286.834	282.276	5.48e-05	-2.19182
Solyc05g006440.4	4617	4001	4967	1286	2641	2605	133.019	114.308	120.313	37.3816	74.9879	77.8705	4.35e-05	-2.19135
Solyc10g079200.2	1332	2329	3549	1102	1247	1038	27.3968	47.5193	61.3856	22.8787	25.2706	22.1507	0.000138942	-2.19016
Solyc04g049840.4	748	838	934	255	508	452	7.29903	8.11776	7.67176	2.51392	4.88716	4.57716	1.19e-05	-2.18943
Solyc10g024360.2	868	511	621	182	413	363	9.3409	5.4552	5.61732	1.97045	4.37974	4.05228	0.00124012	-2.18929
Solyc11g033270.2	7244	7422	8125	3336	4057	3789	42.3658	43.048	39.9534	19.6876	23.3879	22.9981	4.27e-29	-2.18905
Solyc02g087760.3	3598	4839	7020	2024	2509	2826	44.8484	59.8139	73.5671	25.4548	30.8239	36.5438	2.82e-06	-2.18861
Solyc08g074560.3	2925	2792	3690	931	1897	1703	31.4846	29.8026	33.3924	10.1085	20.1287	19.0185	1.69e-05	-2.18813
Solanum_lycopersicum_newGene_2141	128	163	155	34	97	79	1.30622	1.6446	1.3303	0.3425	0.967749	0.831598	0.00344394	-2.18697
Solyc06g083190.4	6710	7413	7431	3163	3819	3605	80.7438	88.4716	75.1837	38.4002	45.295	45.0137	1.56e-26	-2.18632
Solyc12g056350.2	320	525	633	169	174	340	9.24371	15.0359	15.3881	4.91557	4.95399	10.1826	0.00194526	-2.18389
Solyc08g081310.4	4420	4222	4425	1356	2776	2235	77.8089	73.7097	65.4958	24.0753	48.1743	40.8333	5.24e-06	-2.18366
Solyc07g063610.4	1400	1590	2125	699	898	883	51.6049	58.1136	65.8334	25.9972	32.6073	33.7576	2.02e-10	-2.18358
Solyc12g008830.3	630	1233	1150	217	774	421	18.5638	36.0441	28.5094	6.43985	22.4967	12.8705	0.00702085	-2.18017
Solyc07g014650.3	2128	1868	1749	715	1169	942	56.3925	49.0972	38.9743	19.1147	30.5296	25.8977	1.51e-07	-2.17924
Solyc10g081720.2	1583	2168	3857	1002	1164	1406	26.8546	36.4657	55.0084	17.1536	19.4554	24.7526	0.000199485	-2.17917
Solyc05g010810.1	4460	4862	3679	1830	2218	2336	63.9384	69.1307	44.3425	26.4712	31.3435	34.7466	5.22e-09	-2.17812
Solyc03g119700.3	3198	2653	3473	930	1936	1659	102.264	84.1393	93.3857	30.0128	61.0134	55.06	2.53e-05	-2.17777
Solyc10g009080.4	360	379	464	162	232	194	15.0849	15.7452	16.3125	6.84509	9.57244	8.41451	6.61e-10	-2.17726
Solyc12g035190.2	302	578	561	165	276	247	5.45415	10.3638	8.52536	3.00776	4.9068	4.63161	0.000175731	-2.17707
Solyc10g076890.3	1694	1795	2288	856	1016	957	41.9258	44.0367	47.6064	21.3669	24.7853	24.5758	2.65e-17	-2.17659
Solyc08g082720.4	39	66	79	14	30	39	0.470864	0.792948	0.80538	0.166982	0.355771	0.486729	0.0194177	-2.17498
Solyc08g078840.3	268	199	199	72	46	181	4.25886	3.14082	2.66353	1.15217	0.713524	2.9906	0.0242763	-2.1744
Solyc09g010380.3	566	690	1046	328	380	398	11.615	14.05	18.061	6.79821	7.68071	8.474	1.08e-06	-2.17438
Solyc11g071300.2	37	73	89	27	23	40	0.327942	0.654802	0.674899	0.247839	0.204327	0.37678	0.0124296	-2.17415
Solyc07g053630.4	6487	6806	6561	2249	3605	3850	107.162	111.5	91.1255	37.4807	58.6974	65.9972	3.43e-07	-2.17324
Solyc12g096430.1	134	137	121	48	93	49	1.89563	1.92147	1.44374	0.678039	1.30209	0.714432	0.000609117	-2.17182
Solyc06g071500.3	1761	1827	2619	581	1297	1108	16.3547	16.83	20.4543	5.44458	11.8745	10.6777	0.000128698	-2.17158
Solyc07g150145.1	1312	1362	1447	878	498	611	27.5293	28.3435	25.5223	18.5737	10.288	13.2962	6.44e-06	-2.17058
Solyc03g112880.1	112	265	469	130	129	124	2.39489	5.62824	8.46271	2.79946	2.71062	2.76322	0.00977522	-2.17044
Solyc11g027830.2	867	943	1383	325	593	614	17.4051	18.7927	23.3511	6.58927	11.7276	12.7873	6.71e-05	-2.17035
Solyc07g007600.3	37790	44401	57632	18914	25650	23731	376.563	438.788	482.822	190.164	251.924	245.385	6e-11	-2.16998
Solyc01g095300.3	3439	3381	3987	1389	2033	1895	26.5361	25.8682	25.8668	10.8094	15.458	15.1694	1.11e-11	-2.16928
Solyc12g150113.1	200	291	240	79	148	127	6.35384	9.18562	6.4214	2.51367	4.63628	4.193	0.000108358	-2.1692
Solyc11g020960.2	717	994	922	232	361	645	28.8544	39.6604	31.1988	9.40398	14.3157	26.9168	0.00221918	-2.16837
Solyc05g052600.4	21626	24958	37151	8361	15302	16435	368.066	421.263	531.593	143.583	256.695	290.27	8.88e-05	-2.16795
Solyc10g078920.3	3976	3383	3943	1165	1884	2426	156.582	132.135	130.55	46.276	73.1386	99.1437	4.62e-05	-2.16675
Solyc11g005080.1	2993	2549	2735	877	1760	1428	40.689	34.3688	31.2535	12.0299	23.5741	20.1374	1.03e-05	-2.16609
Solyc08g076310.3	1593	2097	2466	797	1076	1125	14.9735	19.5496	19.4927	7.55817	9.96713	10.9778	1.85e-08	-2.16587
Solyc03g115540.2	736	583	676	233	489	256	15.316	12.0362	11.8193	4.87999	10.0228	5.51688	0.000141275	-2.16578
Solyc06g007440.4	6708	6409	4996	2032	3598	3283	102.014	96.659	63.8693	31.1779	53.9245	51.7967	1.3e-05	-2.16542
Solyc06g053840.3	4329	4602	3689	1516	2279	2413	105.623	111.343	75.6687	37.3011	54.8082	61.0901	7.24e-07	-2.16416
Solanum_lycopersicum_newGene_2418	188	217	228	80	99	128	2.41215	1.72906	2.00055	0.625681	0.900229	1.15523	8.75e-06	-2.16298
Solyc04g039730.3	1404	1312	1476	498	833	735	14.2958	13.2483	12.6376	5.11622	8.35897	7.76634	4.21e-08	-2.16245
Solyc12g088400.1	905	168	371	222	152	280	85.6566	15.7672	29.486	21.1843	14.1213	27.4728	0.0398387	-2.16149
Solyc02g092140.1	546	457	396	205	317	168	12.0025	9.95286	7.31518	4.52623	6.86874	3.83009	8.13e-05	-2.16107
Solyc08g005650.3	284	191	223	114	107	120	4.13002	2.7543	2.71956	1.67192	1.52854	1.80519	1.84e-05	-2.16106
Solyc06g005230.3	880	861	1130	356	562	492	21.5642	20.922	23.2829	8.78805	13.5528	12.5031	1.69e-08	-2.16099
Solyc07g064320.3	158	160	221	97	86	79	8.68004	8.70992	10.2022	5.3732	4.64374	4.47485	1.38e-06	-2.1604
Solyc03g083070.3	2236	2126	2631	1208	1169	1080	77.8388	73.3971	76.9901	42.4012	40.1109	38.9988	4.81e-21	-2.16015
Solyc01g066680.3	532	1216	1353	277	667	515	18.9973	43.1172	40.6501	9.98365	23.4841	19.0917	0.00388085	-2.16014
Solyc07g007790.3	8981	7639	7369	3114	4786	4012	65.1448	54.9548	44.9395	22.7896	34.2165	30.1939	2.08e-08	-2.15958
Solyc05g015150.3	1211	1275	1508	483	768	714	13.5156	14.1168	14.1517	5.43692	8.44905	8.27022	1.17e-08	-2.15825
Solyc05g012450.4	968	1281	1676	628	704	585	8.54341	11.2117	12.4315	5.59197	6.1209	5.35313	6.04e-09	-2.15814
Solyc01g087450.3	148	148	113	59	69	72	1.37958	1.36714	0.885534	0.551648	0.628132	0.690226	5.63e-05	-2.15791
Solyc02g030170.4	23869	28396	35411	9420	18748	14671	311.46	367.476	388.482	124.025	241.127	198.653	6.28e-06	-2.15764
Solyc06g068770.3	547	837	1059	268	472	436	6.99652	10.6171	11.3902	3.45191	5.94131	5.78278	0.000100258	-2.15743
Solyc08g081260.1	393	381	573	203	218	236	3.61879	3.47773	4.43287	1.87711	1.97414	2.25124	3.67e-08	-2.15736
Solyc05g005560.4	4812	6048	8709	1472	3262	4455	56.1929	70.0398	85.4988	17.3381	37.5421	53.987	0.00307887	-2.15703
Solyc03g098140.3	714	700	859	345	418	363	12.5204	12.1614	12.6603	6.10533	7.22524	6.59391	3.35e-17	-2.15681
Solyc09g092260.4	830	821	377	121	246	556	27.9773	27.4487	10.6821	4.1121	8.16828	19.4487	0.0341443	-2.15659
Solyc08g006690.1	579	716	526	244	333	322	27.2816	33.4257	20.8189	11.5838	15.4655	15.7244	3.23e-07	-2.15634
Solyc08g075940.4	399	541	879	112	296	423	2.7552	3.70533	5.10334	0.775721	2.01217	3.03011	0.0141298	-2.15608
Solyc04g074860.4	469	454	518	142	328	235	6.66962	6.40162	6.1938	2.03515	4.59673	3.4617	0.000122299	-2.15515
Solyc12g096100.2	847	629	843	314	401	427	40.385	29.7143	33.772	15.1119	18.8103	21.1147	9.4e-08	-2.15459
Solyc05g054480.3	55	70	203	32	35	74	1.09562	1.39935	3.44103	0.640231	0.695657	1.54013	0.0447048	-2.15429
Solyc12g035130.2	80098	80833	61365	35120	41516	34228	944.593	945.398	608.421	417.905	482.572	418.878	1.33e-09	-2.15334
Solyc03g005100.3	1136	1025	1136	449	647	544	16.8953	15.1165	14.1999	6.73755	9.47701	8.39677	1.82e-11	-2.15252
Solyc07g009170.4	152	201	383	60	121	157	3.16592	4.16578	6.74637	1.25294	2.48404	3.41155	0.0106398	-2.15245
Solyc02g065570.1	306	185	123	44	100	142	54.9788	32.9221	18.5671	7.93299	17.6064	26.3985	0.0264808	-2.1521
Solyc01g112140.4	253	294	305	92	145	177	3.70993	4.27313	3.75893	1.35422	2.09793	2.68891	6.52e-05	-2.15114
Solyc09g010860.4	2318	2854	3556	1350	1437	1506	62.4544	76.2707	80.5648	36.6901	38.164	42.0966	2.3e-12	-2.14916
Solyc03g078000.3	5562	5012	5817	1878	3310	2929	69.3858	62.0082	61.0141	23.633	40.6929	37.9123	2.83e-07	-2.14785
Solyc07g064760.2	115	69	79	22	53	50	8.34366	4.95002	4.79813	1.55004	3.77647	3.74388	0.0115035	-2.14665
Solyc06g076770.3	3400	2665	3736	1091	2083	1663	48.5374	37.7358	44.8445	15.7137	29.3048	24.6288	7.16e-06	-2.14574
Solyc03g123570.3	3041	3132	3358	1599	1621	1539	13.2608	13.545	12.3139	7.03678	6.9686	6.9643	1.77e-36	-2.14524
Solyc01g111100.5	218	206	286	98	148	104	2.83199	2.65069	3.12266	1.27651	1.88908	1.40121	1.89e-06	-2.14309
Solyc10g081340.1	259	285	296	51	163	183	4.80351	5.25589	4.61506	0.950389	2.98391	3.52916	0.0096466	-2.14238
Solyc01g087390.2	360	363	382	180	237	132	7.75325	7.7419	6.91366	3.89773	5.01377	2.93412	1.23e-06	-2.14106
Solyc05g056220.3	5502	4506	4339	2496	2290	2371	40.2064	32.6502	26.6574	18.4003	16.4922	17.9746	7.31e-10	-2.141
Solyc07g054820.4	9839	10583	14535	3438	6222	7309	220.017	234.69	273.255	77.5655	137.133	169.6	0.000100921	-2.14089
Solyc03g114970.3	1203	1680	1688	690	853	727	47.0322	65.1433	55.4898	27.2035	32.8462	29.4807	3.73e-12	-2.14053
Solyc12g049510.3	887	1098	1481	353	594	727	5.84344	7.17896	8.20708	2.34618	3.85922	4.97058	0.000183882	-2.14044
Solyc01g096630.3	500	708	545	310	317	243	13.7539	19.3153	12.6132	8.61518	8.58204	6.92339	1.08e-07	-2.13972
Solyc04g080870.1	1241	1083	1389	456	756	633	131.028	113.38	123.282	48.5319	78.687	69.2947	7.37e-08	-2.13945
Solyc01g008530.3	723	731	930	327	445	412	13.2935	13.3404	14.3878	6.06572	8.0668	7.8608	2.46e-11	-2.1394
Solyc10g078930.2	1635	1629	2082	892	1096	673	29.8907	29.5299	31.9959	16.4384	19.7373	12.7523	5.18e-09	-2.13667
Solyc03g114250.4	1282	1201	1847	406	899	804	28.6621	26.6245	34.7083	9.15115	19.7935	18.6523	0.000265952	-2.13656
Solyc07g016180.3	5480	4164	3842	1673	2134	2856	36.4817	27.493	21.5028	11.2356	13.9998	19.729	4.84e-05	-2.13534
Solyc06g076140.4	30352	20847	24384	10586	15957	11351	1376.41	937.561	929.656	484.399	713.233	534.148	7.08e-07	-2.13391
Solyc01g111990.3	4888	4361	6307	1455	3124	3031	39.1595	34.653	42.4855	11.7597	24.669	25.203	0.000168156	-2.13358
Solyc08g008470.2	487	548	694	274	304	281	54.5244	60.8504	65.3324	30.9551	33.4799	32.679	1.56e-12	-2.13346
Solyc10g083520.2	2270	2699	3256	1262	1540	1298	81.2618	95.8405	98.0076	45.5809	54.3229	48.2117	1.56e-15	-2.13317
Solyc10g084150.2	1106	2015	2691	882	896	1020	38.0878	68.8595	77.9576	30.6433	30.4356	36.4471	0.000114268	-2.13307
Solyc02g063350.1	157	187	262	75	99	120	9.86685	11.6396	13.8177	4.75417	6.08785	7.806	0.000117195	-2.13285
Solyc04g071470.3	381	431	513	144	255	253	7.84125	8.79572	8.86407	2.98311	5.16893	5.39482	1.79e-05	-2.13175
Solyc06g053600.4	1355	1729	2624	476	1032	1217	24.7184	31.2787	40.253	8.75899	18.5556	23.0366	0.00207557	-2.13135
Solyc08g082990.3	3667	4129	4365	1829	2651	1617	39.0143	43.5664	39.0513	19.6337	27.7983	17.8526	1.78e-09	-2.13018
Solyc02g067360.3	1459	1541	2498	350	1207	1057	24.0211	25.1604	34.579	5.81681	19.5804	18.0622	0.00701776	-2.13006
Solyc06g072013.1	40	63	107	22	35	40	1.5429	2.45582	3.51895	0.866745	1.34112	1.60557	0.0155387	-2.12892
Solyc02g036370.3	33	47	55	34	17	10	0.43622	0.604426	0.606453	0.440784	0.215723	0.136499	0.0379423	-2.12784
Solyc08g067260.4	4512	6572	6678	3046	3226	2579	64.4159	93.0574	80.1559	43.8742	45.3997	38.2105	7.17e-11	-2.12589
Solyc06g071330.4	267	657	1131	213	282	441	3.32666	8.1349	11.8786	2.68115	3.47194	5.70779	0.017394	-2.12572
Solyc01g110340.4	338	835	1278	251	300	566	5.01425	12.2882	15.9437	3.74546	4.37654	8.72018	0.0168387	-2.12571
Solyc03g019880.3	1695	1708	1629	405	1126	944	64.2747	64.225	51.9201	15.4739	42.0782	37.1221	0.00109351	-2.12524
Solyc01g096370.4	1000	1486	1557	445	687	845	16.8407	24.8181	22.0478	7.55099	11.3959	14.7563	7.36e-05	-2.12472
Solyc03g065340.3	4272	4860	5620	1929	2658	2767	34.9086	39.3834	38.6072	15.906	21.4093	23.4631	3e-10	-2.12441
Solyc03g096080.4	2174	1580	1141	618	899	921	65.6432	47.2952	28.9496	18.8156	26.7576	28.8533	0.000352744	-2.12389
Solyc06g084380.4	107	99	135	62	58	48	1.57902	1.45004	1.68605	0.922777	0.838731	0.726238	2.85e-05	-2.12359
Solyc03g115940.4	6464	8060	7775	4149	3454	3536	86.3454	106.769	87.3192	55.9192	45.4724	49.0133	2.4e-13	-2.12346
Solyc09g082820.3	279	255	220	148	129	99	15.6172	14.1933	10.3574	8.36537	7.13089	5.75556	1.77e-05	-2.12091
Solyc04g007790.3	41453	43324	46359	13091	33925	18269	1383.69	1434.23	1301.02	440.928	1116.16	632.831	0.000289175	-2.12063
Solyc04g074080.3	1057	1330	1449	635	775	512	30.006	37.4361	34.5729	18.1819	21.672	15.0755	8.2e-10	-2.11999
Solyc01g088630.3	145	118	107	54	59	70	3.59644	2.9064	2.22793	1.3362	1.44631	1.79224	0.000215151	-2.11968
Solyc12g019110.3	1776	1715	2411	679	961	1263	19.7807	18.9466	22.5781	7.62579	10.5449	14.5983	2.18e-05	-2.11806
Solyc02g078640.3	6652	8663	9375	3953	4133	4276	26.5582	34.3049	31.4718	15.9268	16.2664	17.7165	2.1e-15	-2.11603
Solyc01g087290.3	2071	2270	2909	814	1353	1430	32.377	35.1991	38.2409	12.8333	20.8525	23.2076	4.83e-06	-2.11317
Solyc09g083120.3	2125	2149	2221	645	1318	1273	22.1178	22.1833	19.438	6.7705	13.5213	13.7523	5.2e-05	-2.11272
Solyc10g039270.2	905	917	1313	215	614	680	21.6988	21.8048	26.4848	5.2046	14.511	16.9329	0.00508656	-2.11184
Solyc07g005530.4	21825	23096	21256	10151	12195	11232	181.852	190.859	148.908	85.3445	100.153	97.1158	1.23e-19	-2.11146
Solyc08g079840.2	3605	3540	4851	1467	2788	1755	45.5734	44.3793	51.5503	18.7077	34.7297	23.0139	4.85e-06	-2.11013
Solyc03g113680.4	1111	1521	1898	495	708	1006	11.6957	15.8845	16.8046	5.25616	7.34821	10.9895	0.000251948	-2.10993
Solyc06g072470.4	5453	5877	8551	2150	3561	4081	198.596	212.275	261.837	79.0146	127.829	154.23	4.55e-05	-2.10989
Solyc04g078810.4	390	725	1045	292	328	417	4.38004	8.07325	9.86148	3.30532	3.62932	4.85255	0.00110109	-2.10988
Solyc11g072000.2	135	165	120	63	81	66	6.44282	7.81701	4.83089	3.0397	3.79023	3.26138	4.36e-05	-2.1098
Solyc07g045540.4	4476	3829	4612	1371	2283	2766	58.4224	49.5692	50.6134	18.0492	29.3723	37.4711	4.22e-05	-2.10933
Solyc10g005870.4	733	736	1015	206	458	545	20.9665	20.8714	24.4229	5.92393	12.9222	16.1892	0.00160466	-2.10928
Solyc04g077120.4	967	636	877	359	541	349	14.3538	9.35709	10.9464	5.37209	7.90921	5.37021	1.07e-05	-2.10855
Solyc07g008900.4	1889	2410	2786	903	1235	1391	17.1824	21.7472	21.3085	8.28816	11.0691	13.1289	1.94e-07	-2.10814
Solyc06g050800.4	102	106	153	50	63	65	1.80484	1.87372	2.28561	0.885958	1.10489	1.18809	7.54e-05	-2.10798
Solyc12g006930.2	6971	7215	10132	4181	3947	4043	112.924	115.905	137.989	68.3298	63.021	67.9623	1.58e-12	-2.10704
Solyc04g077830.2	232	321	294	67	174	172	2.97714	4.08691	3.17184	0.861053	2.20406	2.29364	0.00333087	-2.1069
Solyc04g076100.4	147	327	700	144	204	193	1.01709	2.25621	4.09592	1.00585	1.39758	1.39303	0.0186912	-2.10632
Solyc05g009300.1	2015	2120	2598	662	1208	1455	115.006	120.022	124.655	38.0874	67.931	86.1695	0.000141409	-2.10624
Solyc02g091530.4	748	699	982	261	457	487	14.4945	13.4342	16.007	5.10447	8.72077	9.7968	4.35e-05	-2.10546
Solyc04g016560.2	219	193	183	89	112	99	9.13896	7.97076	6.40127	3.7213	4.57297	4.27023	1.32e-06	-2.10515
Solyc01g006100.4	48	132	331	66	85	75	0.515087	1.41077	3.00281	0.714687	0.899066	0.837757	0.0497025	-2.10413
Solyc10g006030.3	3586	3955	6062	1234	2246	3115	105.62	115.531	150.11	36.678	65.1849	95.2118	0.00132986	-2.10393
Solyc11g022530.3	48	49	60	22	31	24	1.07946	1.092	1.11865	0.481568	0.685192	0.557138	0.00164857	-2.10284
Solyc03g097190.3	5270	6316	8438	3044	3372	3596	41.2779	49.0628	55.5682	24.0528	26.0289	29.2282	3.82e-10	-2.10221
Solyc08g048550.3	1639	1587	2137	591	1138	956	34.9128	33.5232	38.2761	12.7004	23.8847	21.1186	9.6e-06	-2.1018
Solyc03g083130.3	103	135	189	81	64	64	0.689497	0.891432	1.06384	0.54104	0.421459	0.442038	0.000267787	-2.10079
Solyc03g097870.4	48124	36686	30234	13712	24019	20497	913.189	690.407	482.353	262.542	449.236	403.621	8.51e-05	-2.1003
Solyc04g014680.4	1635	1957	2882	730	1169	1295	22.845	27.1196	33.8556	10.2846	16.0898	18.78	6.09e-05	-2.09976
Solyc01g095470.3	878	1469	1988	531	870	730	12.2032	20.2502	23.2384	7.44556	11.9126	10.5198	0.000201914	-2.09964
Solyc02g063180.4	49	93	125	31	46	50	1.9502	3.7222	4.22934	1.2507	1.82795	2.06074	0.00875423	-2.09807
Solyc05g009470.4	5916	9829	23474	4654	8139	5743	50.388	83.0268	168.098	39.9957	68.3259	50.7601	0.0092302	-2.09665
Solyc01g088100.4	8011	9494	9417	3423	5549	4684	75.5332	88.7814	74.6553	32.5615	51.5738	45.8346	3.84e-09	-2.09554
Solyc09g057580.4	1657	1544	1810	540	975	1002	19.6258	18.1402	18.0225	6.45145	11.3786	12.3173	1.5e-05	-2.09435
Solyc02g020980.4	6316	5633	6735	2182	3149	4030	52.7648	46.6696	47.3096	18.3881	25.9261	34.9344	7.82e-06	-2.09428
Solyc01g067900.3	1292	1536	1954	779	819	812	40.7878	48.1081	51.867	24.8088	25.4825	26.5835	1.68e-12	-2.09302
Solyc01g005010.4	382	343	524	170	268	190	9.55722	8.50752	11.0342	4.27595	6.61252	4.92555	4.11e-06	-2.09279
Solyc01g014373.1	921	1044	1047	329	660	531	16.0559	18.0679	15.349	5.77596	11.3477	9.60864	1.33e-05	-2.09265
Solyc02g087870.3	2043	1988	2335	774	1208	1234	13.274	12.8117	12.7523	5.07193	7.73285	8.31808	1.23e-07	-2.09225
Solyc03g121440.4	1902	2301	2629	561	1232	1558	18.951	22.7337	22.0189	5.63363	12.0962	16.1098	0.00165824	-2.09187
Solyc08g083210.3	52	336	296	93	111	106	0.829615	5.31281	3.96897	1.49614	1.7343	1.75126	0.0470897	-2.09106
Solyc11g027840.2	1108	765	1482	315	760	583	28.5548	19.5678	32.1348	8.18952	19.308	15.5788	0.00157635	-2.0907
Solyc04g007970.3	10351	8562	6097	3448	5272	4036	310.865	255.021	153.947	104.47	156.055	125.793	5.13e-05	-2.0897
Solyc10g086650.1	1306	864	1013	371	535	689	22.3395	14.6486	14.5642	6.39042	9.01304	12.2201	0.000242132	-2.08891
Solyc04g016330.3	294	856	1027	350	385	310	3.10675	8.97857	9.13715	3.73258	4.00958	3.3965	0.00537065	-2.08789
Solyc05g010250.3	982	938	1367	495	534	625	46.9938	44.52	54.9849	23.8963	25.1844	31.0292	1.46e-08	-2.08519
Solyc11g008140.3	217	250	352	119	120	167	4.16759	4.76532	5.68525	2.29352	2.26151	3.32571	5.11e-05	-2.08398
Solyc05g050990.1	264	382	590	179	221	210	5.54453	7.96607	10.4527	3.79429	4.58293	4.58183	0.00015603	-2.08381
Solyc01g107990.3	564	710	1008	331	437	377	8.89196	11.1148	13.3754	5.26565	6.80025	6.16367	8.31e-07	-2.0838
Solyc02g085130.4	156	189	367	111	133	104	2.50408	3.0087	4.97377	1.7991	2.10358	1.72503	0.00117346	-2.08329
Solyc09g060100.3	597	725	1185	257	524	456	12.1538	14.6486	20.2993	5.27238	10.5077	9.62587	0.000764794	-2.08185
Solyc08g061800.3	573	601	821	193	341	451	33.6746	34.9861	40.5336	11.4429	19.7511	27.494	0.000761063	-2.08153
Solyc01g109860.3	221	153	128	37	91	116	2.69435	1.84262	1.30699	0.456247	1.08752	1.46132	0.0189286	-2.08122
Solyc07g043580.4	7231	6765	6715	2526	4270	3785	92.859	86.1509	72.5003	32.724	54.0455	50.4294	2.72e-07	-2.0809
Solyc12g096320.2	631	716	963	232	421	494	14.8763	16.7419	19.098	5.52208	9.77952	12.0982	0.000340961	-2.07908
Solyc01g096620.4	721	742	643	392	377	309	22.1057	22.5417	16.5653	12.1139	11.3944	9.81342	1.59e-09	-2.07896
Solyc02g064950.3	5639	5248	7897	2134	3992	3347	119.225	110.031	140.369	45.5086	83.1871	73.4226	1.34e-05	-2.07881
Solyc09g010360.3	703	857	574	250	464	371	8.87087	10.7298	6.09492	3.18089	5.76418	4.85521	0.000119159	-2.07808
Solyc01g108670.4	97	227	512	109	86	180	0.295636	0.685811	1.31001	0.332941	0.256929	0.569375	0.0430501	-2.07738
Solyc11g011630.3	103	75	62	22	26	65	6.33073	4.54318	3.2101	1.36388	1.52198	4.12996	0.0377395	-2.0772
Solyc06g060880.4	465	482	516	173	322	250	8.74132	8.99309	8.16155	3.27879	5.95935	4.86748	4.52e-06	-2.07601
Solyc01g102950.3	257	409	1120	154	422	254	3.33077	5.25531	12.2073	2.00433	5.39248	3.41128	0.0330811	-2.07496
Solyc02g092570.1	362	485	583	200	265	257	7.56518	10.0581	10.2483	4.22044	5.4564	5.56713	4e-07	-2.07494
Solyc05g009500.3	97	232	396	43	151	138	1.33978	3.1915	4.61777	0.602248	2.062	1.97837	0.0474527	-2.0744
Solyc09g083090.4	285	237	296	127	156	135	4.94179	4.07407	4.31273	2.21472	2.66829	2.41759	1.84e-08	-2.0729
Solyc02g076950.2	282	231	355	160	168	111	8.05055	6.53974	8.5358	4.6076	4.7215	3.28804	1.46e-05	-2.07185
Solyc08g061100.3	16237	25388	30377	10385	13324	12575	119.222	184.874	187.527	76.937	96.4272	95.8147	7.53e-07	-2.07127
Solyc09g008930.4	1394	1435	1281	491	878	737	21.2086	21.647	16.3781	7.52708	13.1588	11.6248	2.85e-06	-2.07058
Solyc01g087040.2	3562	3956	5867	748	2302	3352	101.326	111.613	140.35	21.4699	64.5496	98.9539	0.0171152	-2.07012
Solyc05g010010.1	104	100	129	46	54	67	3.66944	3.49089	3.83687	1.617	1.88414	2.43681	0.00013113	-2.06965
Solyc08g077550.3	190	392	753	196	131	290	4.29651	8.78905	14.3134	4.45431	2.91803	6.79113	0.0238852	-2.06844
Solyc01g067690.4	106	108	118	47	58	63	4.84537	4.88529	4.53604	2.14223	2.58693	2.97509	2.75e-05	-2.06764
Solyc11g051160.2	6657	4944	5781	2590	3661	2715	88.3704	65.0888	64.5188	34.688	47.8998	37.3902	3.35e-08	-2.06743
Solyc02g086740.1	2246	2489	5200	774	1829	2182	110.361	121.315	214.846	38.3553	88.5808	111.275	0.00908545	-2.067
Solyc12g042240.2	588	573	608	243	301	359	20.8123	20.1074	18.0993	8.68728	10.5064	13.1935	6.86e-08	-2.06673
Solyc08g008290.3	2854	2298	1980	1419	1154	1081	72.8442	58.1651	42.485	36.5483	29.0189	28.6321	3.97e-06	-2.06651
Solyc04g015040.3	2159	1883	2995	528	1268	1656	62.2417	53.8547	72.6097	15.3543	36.0416	49.557	0.0051387	-2.06608
Solyc11g012520.1	93	128	155	36	80	70	6.70773	9.16228	9.38197	2.61271	5.69737	5.19485	0.0032761	-2.06565
Solyc07g056350.3	2508	3562	4519	1660	1933	1770	28.4543	40.0767	43.102	19.0023	21.6112	20.8382	4.87e-08	-2.06543
Solyc03g117180.3	640	720	1103	372	489	386	9.74734	10.8829	14.1289	5.70686	7.34185	6.10212	8.44e-07	-2.06541
Solyc06g076790.1	973	1226	1783	401	769	811	83.5383	104.354	128.706	34.6884	65.0967	72.2737	0.000551255	-2.06539
Solyc04g011430.3	7695	7408	5010	3238	4243	2898	189.244	180.692	103.586	80.3472	102.86	73.9558	1.31e-05	-2.0653
Solyc10g083670.3	143	235	687	82	204	200	1.69067	2.75685	6.84982	0.974911	2.38201	2.46424	0.046186	-2.06497
Solyc10g008665.1	501	424	481	123	365	222	29.8978	25.0869	24.1295	7.35155	21.4355	13.725	0.00280996	-2.06314
Solyc04g045600.4	1403	1806	1933	962	836	828	29.347	37.4582	33.9825	20.3033	17.2184	17.9542	1.08e-11	-2.0626
Solyc12g094630.2	3264	3391	4122	1295	2129	2077	100.544	103.601	106.756	40.2515	64.6226	66.3811	4.16e-07	-2.06234
Solyc09g009420.1	1626	2005	2031	741	914	1217	96.4085	117.894	101.247	44.2862	53.404	74.841	1.59e-06	-2.06232
Solyc10g085120.3	209	164	248	47	170	90	1.8877	1.47055	1.88386	0.42241	1.51239	0.839695	0.0132939	-2.06136
Solyc03g033510.3	37	63	61	25	20	33	0.45596	0.768833	0.632131	0.299913	0.239058	0.422043	0.0101548	-2.06089
Solyc09g010060.3	71	114	251	54	65	86	0.553864	0.878449	1.64685	0.424152	0.500039	0.697226	0.0209954	-2.06045
Solyc01g006130.4	3149	2320	3448	832	1872	1794	80.2401	58.6148	73.8563	21.3846	47.0021	47.4178	0.000695273	-2.06028
Solyc03g123590.4	46	70	132	31	39	48	0.703257	1.06653	1.6946	0.472692	0.581247	0.751829	0.0168019	-2.05994
Solyc02g084590.4	517	717	856	228	351	464	11.6228	15.9711	16.1747	5.16282	7.76748	10.8083	0.00039508	-2.05926
Solyc05g026570.3	1043	870	1121	243	585	686	42.4395	35.1362	38.3564	9.95907	23.4786	28.9883	0.00297517	-2.05819
Solanum_lycopersicum_newGene_2453	761	689	792	208	437	486	7.62505	6.84968	6.67575	2.09688	4.31698	5.03908	0.000703341	-2.05804
Solyc10g076280.3	74	127	122	46	62	54	1.36026	2.30533	1.88206	0.848599	1.10789	1.0269	0.000608083	-2.05766
Solyc10g084970.2	829	816	907	363	446	502	17.4748	17.0558	16.0736	7.71275	9.27248	10.9705	5.22e-10	-2.05738
Solyc10g078700.3	121	114	135	22	72	85	2.96223	2.77276	2.78063	0.525849	1.7407	2.16151	0.0233592	-2.05734
Solyc01g104400.3	115	261	368	72	160	127	4.33561	9.79315	11.6928	2.7157	5.95473	4.97045	0.0147368	-2.05548
Solyc08g066750.3	779	984	1462	416	545	656	10.8749	13.6164	17.1501	5.85871	7.49478	9.49913	6.12e-05	-2.05544
Solyc05g008350.3	4811	5658	5957	1565	3355	3407	52.4211	61.149	54.5725	17.204	36.0302	38.527	0.000245306	-2.05378
Solyc03g096460.4	595	777	1028	195	488	507	20.7602	26.8694	30.1543	6.86046	16.7829	18.3612	0.00346069	-2.05309
Solyc12g056980.1	2836	3532	3621	1266	1896	1962	84.6158	104.504	90.835	38.1043	55.7384	60.7424	1.13e-07	-2.05163
Solyc07g055050.3	12573	11437	21590	4736	8772	9298	238.749	215.385	344.67	90.7306	164.183	183.216	0.00062478	-2.05096
Solyc11g010600.2	6889	10722	13860	4314	5784	5801	93.7053	144.633	158.503	59.2032	77.5446	81.8854	1.3e-05	-2.0507
Solyc07g048090.2	156	420	725	217	165	230	6.1298	16.4303	24.0129	8.60084	6.39205	9.37984	0.0208271	-2.05049
Solyc04g010190.1	1417	1327	2249	613	987	932	68.4989	63.6425	91.4603	29.9112	47.032	46.7642	2.85e-05	-2.04931
Solyc01g104710.3	986	1162	1212	291	649	750	36.6669	42.845	37.904	10.9012	23.7969	28.9504	0.00137394	-2.04907
Solyc03g115230.3	369	363	511	106	421	75	3.13178	3.0597	3.65421	0.905285	3.52412	0.655185	0.0472568	-2.04879
Solyc01g087260.4	4413	4127	4966	1585	3556	1808	65.1296	60.3996	61.6194	23.5989	51.7229	27.6825	0.000195622	-2.04804
Solyc06g075460.4	95	162	156	44	71	90	5.37398	9.12059	7.43677	2.48823	3.96929	5.30658	0.0036301	-2.04644
Solyc09g031970.3	10544	10750	15530	3766	7905	7040	93.1459	94.1819	115.343	33.5628	68.8324	64.5404	0.000148385	-2.04571
Solyc06g083040.3	2440	5569	4580	600	3031	2448	37.4772	84.8332	59.1361	9.29561	45.8784	39.0087	0.0322477	-2.04524
Solyc09g083150.4	2368	2277	3513	661	1645	1769	61.3059	58.4408	76.4503	17.2494	41.9616	47.5018	0.00281536	-2.0444
Solyc04g045470.4	548	942	1126	372	466	483	6.12917	10.4657	10.6004	4.19417	5.14098	5.60527	5.47e-05	-2.04371
Solyc01g059870.4	4349	5330	5679	2094	2984	2858	27.3394	33.2279	30.01	13.2806	18.4845	18.6424	4.12e-10	-2.04273
Solanum_lycopersicum_newGene_2731	248	277	242	122	185	88	3.1877	3.81717	2.66366	1.65661	2.36254	1.1646	0.000269815	-2.04228
Solyc01g106790.3	1041	1081	1201	517	664	549	27.5746	28.3969	26.7547	13.8054	17.333	15.083	1.15e-17	-2.04194
Solyc07g042315.1	2958	2940	3552	1266	1952	1681	41.6283	41.0245	42.0231	17.9672	27.0711	24.5501	9.97e-10	-2.04119
Solyc10g007120.4	3826	3274	5865	948	2797	2701	72.5008	61.5231	93.432	18.1243	52.2307	53.1118	0.00643959	-2.03926
Solyc09g010120.2	2365	2295	3186	788	1611	1596	74.4937	71.6968	84.3942	25.0236	50.0114	52.1752	0.000204856	-2.03919
Solyc05g009310.3	1833	1442	2289	411	1107	1259	33.4036	26.0484	35.0684	7.54073	19.8799	23.7968	0.00609665	-2.03641
Solyc03g117690.3	1444	1753	2245	264	1304	1095	23.3186	28.0784	30.4868	4.29668	20.7465	18.3434	0.0238362	-2.03598
Solyc10g150105.1	155	170	249	104	109	80	3.99311	4.34961	5.3888	2.69643	2.76148	2.13295	3.44e-05	-2.0345
Solyc10g081490.2	250	420	335	156	222	139	8.4598	14.126	9.52432	5.32301	7.4072	4.89056	9.05e-05	-2.03435
Solyc02g084990.3	2065	1853	2129	856	1104	1183	31.9018	28.3938	27.6573	13.3435	16.8061	18.9735	6.23e-10	-2.03392
Solyc08g005010.4	8410	7791	9271	3039	4539	5526	128.395	117.964	118.994	46.8119	68.2981	87.5471	7.45e-06	-2.03371
Solyc05g025890.3	742	761	823	296	498	415	22.0622	22.4363	20.5557	8.88069	14.5779	12.8033	1.99e-07	-2.03325
Solyc01g105680.4	2222	2011	2758	779	1577	1248	24.6928	22.1646	25.7759	8.73721	17.2717	14.388	3.68e-05	-2.03311
Solyc12g056240.2	299	325	306	156	164	164	9.75823	10.5169	8.38903	5.12476	5.28642	5.53745	2.29e-10	-2.03196
Solanum_lycopersicum_newGene_167	117	133	165	61	101	50	1.51093	1.76253	1.79244	1.13426	1.296	0.695211	0.000836576	-2.03145
Solyc01g087520.3	2519	2555	4042	939	1831	1858	79.3533	79.8403	107.07	29.8248	56.8493	60.7361	0.000361875	-2.0303
Solyc05g032660.4	2134	2564	3710	849	1690	1720	44.4316	52.9387	64.9457	17.8237	34.6889	37.1567	0.000492679	-2.03025
Solyc05g053870.3	1016	1337	1676	652	731	694	15.8689	20.7024	22.0045	10.2637	11.2527	11.2471	3.35e-09	-2.03023
Solanum_lycopersicum_newGene_2797	109	100	74	26	43	71	1.35373	1.22868	0.773604	0.324974	0.520224	0.918275	0.0191072	-2.03013
Solyc12g010790.2	1002	933	1124	634	393	539	26.2909	24.2931	24.8015	16.7807	10.1543	14.673	6.94e-06	-2.02971
Solyc03g083550.1	133	167	225	71	118	79	2.98485	3.73569	4.26627	1.61671	2.62108	1.84409	0.00027298	-2.0297
Solyc06g075470.3	61	51	99	17	47	39	6.97227	5.79784	9.4695	1.91271	5.23806	4.55533	0.0238744	-2.02963
Solyc04g080860.1	987	925	1193	370	663	574	146.235	135.965	148.591	55.2964	96.8204	88.2605	4.83e-06	-2.02943
Solyc01g067480.4	798	1128	1383	411	594	681	8.77844	12.3117	12.7925	4.56168	6.43874	7.77177	4.46e-05	-2.0293
Solyc06g009670.3	55	143	267	80	61	77	0.708536	1.82942	2.90566	1.03761	0.767685	1.03666	0.0354525	-2.02768
Solyc01g091200.4	441	559	823	264	312	352	6.47255	8.14362	10.1643	3.90477	4.52047	5.36894	2.19e-05	-2.02752
Solyc09g042710.3	111	191	314	74	87	138	1.45674	2.48531	3.47119	0.980165	1.12479	1.87754	0.0118972	-2.02715
Solyc10g086565.2	254	404	382	88	170	258	4.15302	6.57554	5.26612	1.45134	2.7372	4.38785	0.00816715	-2.02696
Solyc01g010370.3	270	311	359	143	126	209	2.65721	3.03374	2.96819	1.4115	1.22229	2.12927	9.86e-05	-2.02639
Solyc12g099940.2	1841	1504	865	487	715	951	38.6806	31.3263	15.2799	10.3168	14.7995	20.7348	0.00440106	-2.02619
Solyc07g064480.1	53	61	89	27	31	43	1.48986	1.69828	2.09784	0.74471	0.840868	1.25061	0.00492881	-2.02608
Solyc03g082380.4	7763	7616	6885	3706	4380	3632	164.01	159.584	122.3	78.9959	91.1943	79.6299	5.12e-14	-2.02518
Solyc10g079600.2	281	444	425	293	124	154	11.0875	17.4027	14.1188	11.6802	4.82969	6.28399	0.00507063	-2.02389
Solyc08g014470.4	3235	3017	2932	1142	1848	1805	40.2836	37.2521	30.6985	14.339	22.6748	23.3244	1.36e-06	-2.02335
Solyc04g008950.4	177	174	124	86	74	85	4.58276	4.45542	2.6964	2.23529	1.87451	2.26138	0.000305158	-2.02288
Solyc02g086130.4	2682	2979	3653	946	2117	1735	21.9002	24.1271	25.0821	7.79208	17.0374	14.6971	0.000169881	-2.02262
Solyc03g113250.4	1709	3894	2834	456	1590	2058	23.6295	53.399	32.9445	6.35461	21.6647	29.5282	0.0302747	-2.02208
Solyc10g081100.3	1986	2254	3571	738	1401	1783	107.578	121.069	162.612	40.2857	74.7509	100.204	0.00204575	-2.0217
Solyc03g120940.4	3706	3516	3526	1558	2229	1867	78.709	74.0569	62.9604	33.3911	46.6532	41.1521	3.29e-11	-2.0216
Solyc08g081190.3	14161	16187	21933	8312	11400	7458	317.692	360.143	413.691	188.142	252.068	173.624	7.21e-08	-2.02158
Solanum_lycopersicum_newGene_2517	98	161	255	97	72	85	2.76238	4.54366	5.98563	2.59127	1.85298	2.66133	0.00452459	-2.0212
Solyc02g087960.3	736	536	728	426	348	262	17.3379	12.5276	14.4284	10.1307	8.08642	6.40102	2.47e-05	-2.0194
Solyc03g111710.3	484	396	497	171	195	335	9.09503	7.3694	7.85146	3.2422	3.60518	6.52953	0.000759117	-2.01834
Solyc10g079440.2	306	266	307	135	159	165	4.99401	4.30237	4.21427	2.21614	2.55996	2.78391	3.34e-08	-2.01808
Solyc12g041880.2	1497	1516	2216	532	1042	1101	33.4564	33.6203	41.6546	11.9981	22.9558	25.5368	0.000385015	-2.01591
Solyc02g077140.3	261	144	173	98	143	55	5.43274	2.9756	3.03219	2.06214	2.92712	1.18945	0.0106922	-2.01546
Solyc02g093220.3	882	902	839	504	562	307	21.3643	21.6895	17.1006	12.308	13.4144	7.72417	1.26e-05	-2.01531
Solyc03g118620.3	3231	2397	2588	1386	1447	1483	23.9549	17.6285	16.1308	10.371	10.5751	11.4058	2.13e-08	-2.01493
Solyc11g065340.2	2897	1939	1554	1108	1366	878	28.3933	18.8486	12.7989	10.9513	13.1929	8.92721	0.000477359	-2.01436
Solyc02g087850.1	2673	2114	2788	1321	1405	1252	58.4858	45.8672	51.2842	29.1663	30.2873	28.4257	2.26e-12	-2.01429
Solyc07g025520.3	726	790	968	264	527	492	22.0172	23.7627	24.6728	8.07479	15.7466	15.4685	0.000119449	-2.01396
Solyc03g123560.3	4152	5085	5279	3063	1661	2695	87.7727	106.622	93.8278	65.3453	34.6101	59.1221	8.93e-05	-2.01112
Solyc07g014590.4	1038	1021	1276	294	755	665	10.2635	10.0187	10.6116	2.93553	7.3606	6.82195	0.00138245	-2.01103
Solyc01g110370.4	227	244	230	122	132	114	4.45883	4.75523	3.79188	2.41633	2.54141	2.32642	8.78e-09	-2.01056
Solyc09g063070.3	1285	1468	1184	604	797	677	26.5318	30.0548	20.5531	12.5739	16.2179	14.4893	1.52e-09	-2.01023
Solyc01g087570.2	265	309	376	86	107	272	13.3045	15.3759	15.9053	4.34851	5.28572	14.1595	0.0190248	-2.00812
Solyc12g049520.2	137	132	210	38	81	118	5.09218	4.87216	6.56204	1.41863	2.95664	4.54955	0.0158704	-2.00711
Solyc02g083340.4	3338	3847	4541	1283	2630	2187	29.6589	33.8999	33.923	11.4997	23.03	20.1612	4.73e-05	-2.00689
Solyc06g076410.4	1748	1859	1761	945	1083	815	36.5914	38.5974	30.9858	19.9439	22.3328	17.7035	3.46e-14	-2.00536
Solyc03g007370.3	1728	1473	1541	658	1071	779	23.6172	19.9593	17.71	9.07402	14.4263	11.0445	4.58e-07	-2.00502
Solyc02g021000.3	2162	2250	3231	887	1536	1534	68.6628	70.8525	86.2688	28.3989	48.0647	50.5388	3.7e-05	-2.00437
Solyc08g066850.3	1259	1361	1892	462	981	885	11.2906	12.1019	14.267	4.17356	8.67103	8.22904	0.000335803	-2.00409
Solyc07g043570.3	3421	3570	5030	1050	3028	2107	69.4543	71.8803	85.8515	21.4934	60.5786	44.3815	0.00222931	-2.00239
Solyc07g006000.3	4046	4263	6413	1413	2546	3517	133.896	139.937	178.44	47.1852	83.0562	120.788	0.00179532	-2.00191
Solyc07g052240.3	118	300	558	110	135	218	1.56035	3.93268	6.21408	1.4657	1.75084	2.99499	0.0373681	-2.00159
Solyc04g054520.3	1990	2294	4117	680	1681	1848	53.7793	61.4792	93.5517	18.5359	44.7816	51.8151	0.00752249	-2.00076
Solyc05g012600.3	1727	1752	2185	549	1057	1307	55.555	55.8801	59.0901	17.8205	33.5038	43.6166	0.000763593	-2.00061
Solyc06g071790.3	19225	20073	30605	6711	14074	15029	304.467	315.263	407.492	107.228	219.683	246.99	0.00093982	-2.0003
Solyc06g073320.3	30767	35310	34930	16546	19622	17397	370.605	421.811	353.738	201.095	232.96	217.458	3.73e-27	-2.00018
Solyc09g092640.3	331	215	232	105	223	74	5.64056	3.6168	3.31193	1.80199	3.74033	1.2993	0.0131448	-1.99986
Solyc07g006360.1	592	696	669	347	391	297	11.3215	13.2071	10.7648	6.68933	7.3649	5.89621	4.12e-12	-1.99972
Solyc11g069270.2	3978	6211	11348	1906	4931	3921	36.8391	57.0457	88.3637	17.8104	45.0138	37.6856	0.00989898	-1.99885
Solyc09g005030.3	127	159	100	39	91	69	5.20348	6.47893	3.43242	1.60893	3.67143	2.9148	0.00729262	-1.99726
Solyc04g079050.3	3362	3086	3728	1098	2688	1552	102.648	93.4453	95.6867	33.815	80.8722	49.1461	0.000429806	-1.99648
Solyc12g014020.2	180	162	165	94	83	89	12.0254	10.7174	9.28787	6.30389	5.48384	6.1732	4.43e-06	-1.99574
Solyc03g093460.3	438	493	735	320	328	217	8.38818	9.35827	11.8301	6.17932	6.17656	4.30284	2.61e-05	-1.99561
Solyc07g022770.1	276	287	381	117	174	199	10.1173	10.4405	11.7733	4.30314	6.30283	7.5577	6.13e-05	-1.99471
Solyc02g084230.3	1626	1190	1179	617	715	779	51.6928	37.5194	31.5126	19.7876	22.4022	25.6813	4.4e-06	-1.9944
Solyc01g087770.4	315	448	473	114	263	258	5.93134	8.35992	7.49191	2.16497	4.87398	5.04298	0.00236221	-1.99278
Solyc05g024260.3	1740	2761	2822	590	2179	982	37.2406	58.6142	50.7738	12.7402	45.9587	21.8102	0.0118652	-1.99197
Solyc05g008400.4	912	998	922	367	516	606	21.7786	23.6317	18.5055	8.82581	12.1448	15.024	3.64e-06	-1.9916
Solyc11g071610.2	88	127	136	29	84	65	0.477049	0.684456	0.620683	0.158849	0.450973	0.363595	0.0123146	-1.9913
Solyc04g005180.4	471	565	591	156	388	303	11.879	14.121	12.5245	3.9603	9.63287	7.91115	0.0010615	-1.98997
Solyc08g078010.3	3803	4185	6196	1485	2264	3481	96.2718	105.065	131.89	37.9363	56.4847	91.4536	0.00153193	-1.98993
Solyc02g079200.1	1133	1691	1594	330	860	1054	18.0405	26.7047	21.3461	5.28798	13.4995	17.4071	0.00808421	-1.98993
Solyc10g006330.3	3613	3288	4053	1559	2367	1889	34.9612	31.5515	32.9734	15.2233	22.5733	18.9617	1.03e-09	-1.98976
Solyc05g052720.1	663	693	577	271	367	385	41.1167	42.6249	30.1035	16.9693	22.4396	24.7861	1.13e-06	-1.98934
Solyc09g005310.3	2272	3083	3957	1516	1560	1775	31.1571	41.9384	45.6309	20.9784	21.0858	25.262	2.97e-07	-1.98879
Solyc02g070050.3	1003	1361	1698	617	688	810	23.7579	31.9788	33.8394	14.7447	16.0661	19.9138	1.33e-06	-1.98868
Solyc01g005330.3	4363	4772	6149	2055	3084	2904	44.6939	48.4848	52.9642	21.2362	31.1407	30.871	5.48e-08	-1.98865
Solyc03g025730.3	750	1046	1306	454	574	590	6.37387	8.81593	9.33353	3.8891	4.80657	5.19717	1.84e-06	-1.98827
Solyc06g005560.4	207	576	689	182	166	366	4.95773	13.7157	13.8939	4.38693	3.92185	9.11303	0.0268451	-1.98597
Solyc03g117850.4	1087	1368	2003	621	931	774	18.2137	22.7397	28.225	10.493	15.3683	13.4538	1.31e-05	-1.98506
Solyc08g066530.4	340	540	680	181	329	295	7.84509	12.3628	13.1989	4.19773	7.47672	7.04965	0.000770604	-1.98423
Solyc01g010520.3	1008	1213	1339	414	705	746	17.3019	20.6417	19.3146	7.16411	11.9204	13.2849	3.09e-05	-1.98417
Solyc09g065300.4	806	731	1072	283	550	528	22.4685	20.2097	25.1458	7.94605	15.1262	15.2686	0.000243577	-1.98371
Solyc07g063960.3	4855	4987	7940	1699	3329	4089	153.312	156.182	210.825	54.1298	103.602	134.001	0.00186813	-1.98304
Solyc04g054980.3	5152	5639	8400	2636	4218	3227	110.797	120.262	151.888	57.1972	89.4113	72.0128	3.01e-06	-1.9829
Solyc11g069090.2	75184	58060	47523	32783	30541	32731	868.087	664.833	461.313	381.928	347.564	392.173	1.07e-05	-1.98224
Solyc11g033284.1	1139	1243	2147	521	987	835	27.2846	29.5243	43.2368	12.5714	23.2983	20.7374	0.000533185	-1.98196
Solyc03g065250.4	12362	21226	27286	9529	13475	8647	149.425	254.449	277.291	116.223	160.542	108.464	0.000178001	-1.98059
Solyc04g079080.2	68	107	98	27	63	50	1.66385	2.60032	2.02007	0.650327	1.51666	1.25528	0.00827627	-1.98035
Solyc11g045100.2	707	577	606	252	366	384	6.14907	4.97234	4.42686	2.20385	3.13127	3.46245	8.26e-06	-1.9803
Solyc05g025810.3	2551	2393	2272	710	1692	1403	53.8775	50.1237	40.3538	15.1171	35.223	30.7514	0.000662601	-1.98008
Solyc08g076720.4	1808	1801	2077	941	1131	966	12.3585	12.2064	11.9368	6.48638	7.6165	6.84931	1.99e-22	-1.97952
Solyc04g056580.3	5351	4970	6300	1682	3585	3451	150.535	138.667	149.019	47.7229	99.3929	100.743	0.000291135	-1.97816
Solyc08g078960.4	2566	1818	2037	1160	1274	997	25.7594	18.0959	17.1887	11.7487	12.6062	10.3799	3.81e-07	-1.97757
Solyc02g084720.3	945	3035	5868	1333	1832	1614	7.34955	23.4249	38.4017	10.4638	14.0559	13.0343	0.0329039	-1.97573
Solyc12g014150.3	849	666	1116	302	506	563	13.9161	10.8233	15.3788	4.98274	8.16078	9.56604	0.000378963	-1.9755
Solyc02g077850.3	1913	2388	2606	1052	1287	1327	23.247	28.7814	26.6273	12.893	15.4185	16.7314	3.39e-11	-1.97419
Solyc03g111670.3	1836	2198	3122	1133	1286	1341	22.3037	26.4785	31.8935	13.8868	15.3928	16.9011	1.45e-07	-1.97351
Solanum_lycopersicum_newGene_2298	88	60	59	35	39	34	4.48571	3.02373	2.5235	1.7815	1.94464	1.8031	0.00437419	-1.97347
Solyc07g064030.4	442	686	1076	340	393	402	4.28198	6.59802	8.77916	3.32941	3.75201	4.04049	0.000517212	-1.97145
Solyc05g026240.3	390	528	912	238	403	303	9.1212	12.2642	17.962	5.61519	9.30635	7.36096	0.00139228	-1.97137
Solyc12g011410.1	109	158	148	48	93	76	18.5121	26.6515	21.0739	8.18494	15.4785	13.249	0.00122604	-1.97081
Solyc05g010813.1	541	481	397	211	248	295	61.3368	54.1073	37.8295	24.1102	27.6301	34.6273	3.42e-05	-1.97067
Solyc03g114350.1	965	508	702	335	393	422	30.5725	15.9492	18.6794	10.6889	12.2689	13.865	0.000386846	-1.97004
Solyc11g068730.2	2003	2177	2683	742	1586	1294	38.5395	41.5228	43.3877	14.3997	30.0769	25.8216	0.000132795	-1.96949
Solyc08g066030.3	507	556	427	271	282	245	18.7744	20.4061	13.2848	10.0973	10.2787	9.39758	1.83e-07	-1.96722
Solyc01g006690.4	906	1190	1624	284	1005	627	12.0771	15.7317	18.1935	3.80871	13.2001	8.6636	0.0109094	-1.96532
Solyc10g076300.2	238	189	245	78	135	141	9.43576	7.4272	8.1586	3.11269	5.2714	5.80253	0.000494026	-1.96445
Solyc11g066410.2	4648	4409	6500	1353	2564	4053	137.05	128.923	161.13	40.238	74.5192	124.003	0.00579055	-1.96441
Solyc11g007900.3	8039	6691	8567	2778	4758	4846	45.8012	37.8093	41.0379	15.9691	26.7198	28.6526	2.17e-05	-1.9628
Solyc11g067010.2	1487	1190	968	594	668	692	56.8495	45.1105	31.1013	22.8946	25.1552	27.4416	1.62e-05	-1.96243
Solyc10g080080.3	3525	3670	5504	1632	2493	2568	48.3224	49.9013	63.4381	22.5702	33.6805	36.5251	1.33e-05	-1.96233
Solyc10g079190.3	1475	1189	1186	606	717	744	24.2785	19.4106	16.4189	10.0568	11.6335	12.7071	1.14e-07	-1.96209
Solyc10g005640.4	410	374	474	225	256	193	4.83004	4.37017	4.69569	2.67055	2.9688	2.34896	2.11e-09	-1.9604
[truncated: 6,108 more rows]
